# Supplementary material for: Biochemical and transcriptomic analyses reveal that critical genes involved in pigment biosynthesis influence leaf color changes in a new sweet osmanthus cultivar ‘Qiannan Guifei’
Source: PeerJ. 2021 Oct 8;9:e12265. doi: 10.7717/peerj.12265 (PMC8504463; doi:10.7717/peerj.12265)
Supplement: Supplemental Information 1 [file peerj-09-12265-s001.xlsx]

## Sheet: Sheet1
Table S1 Six OfMYBs and 35 MYBs from other plant species used for phylogenetic analysis
Species	Gene name	GenBank accession number
Osmanthus fragrans	OfMYB1	MT481994
	OfMYB2	MT481995
	OfMYB3	MT481996
	OfMYB4	MT481997
	OfMYB5	MT481998
	OfMYB6	MT481999
Arabidopsis thaliana	AtMYB4	At4g38620
	AtMYB6	AT4G09460
	AtMYB12	ABB03913
	AtMYB23	NP_198849
	AtMYB32	AT4G34990
	AtMYB75	AAG42001
	AtMYB113	NP176811
	AtMYBTT2	CAC40021
	AtGL1	P27900
	AtWER	NP_196979
Anthurium andraeanum	AaMYB1	AAO92352.1
Antirrhinum majus	AmROSEA1	ABB83826
	AmMYB308	P81393
Gerbera hybrid	GhMYB10	CAD87010
Lilium hybrid	LhMYB6	BAJ05399
	LhMYB12	BAJ05398
Lotus japonicas	LjTT2a	AB300033
Malus × domestica	MdMYB10	ACQ45201
	MdMYB16	ADL36756
Medicago truncatula	MtLAP1	ACN79541
Nicotiana tabacum	NtAN2	ACO52472
Oncidium hybrid	OhMYB1	ABS58501
Oryza sativa	OsC1	BAD04024
	OsMYB-IF35	BAB20661
Petunia hybrida	PhAN2	AAF66727
	PhMYB4	ADX33331
Phalaenopsis equestris	PeMYB2	AIS35919.1
Phalaenopsis schilleriana	PsMYB6	FJ039860
Solanum lycopersicum	SlMYB12	NP_001234401
Vanda hybrid	VhMYB6	ADQ57817
Vitis vinifera	VvMYBA1	BAD18977
	VvMYBF1	FJ948477
Zea mays	ZmC1	AAA33482
	ZmP1	AAC49394
	ZmMYB38	P20025
