# Supplementary material for: Biochemical and transcriptomic analyses reveal that critical genes involved in pigment biosynthesis influence leaf color changes in a new sweet osmanthus cultivar ‘Qiannan Guifei’
Source: PeerJ. 2021 Oct 8;9:e12265. doi: 10.7717/peerj.12265 (PMC8504463; doi:10.7717/peerj.12265)
Supplement: Supplemental Information 2 — Table S2 Primers used for qRT-PCR. Table S3 Summary of novel transcript. Table S4 Summary of assembly quality of novel coding transcript. [file peerj-09-12265-s002.xlsx]

## Sheet: Table S2
Table S2. Primers used for qRT-PCR
Gene ID	GenBank accession number	Gene name	Forward primer 5’→3’	Reverse primer 5’→3’
evm.model.Contig337.42	MT495420	OfPAL	AATGGTAACTCAGACGCCAAACT	ACCATACGCTTCACCTCATCG
evm.model.Contig482.28	MT495418	OfF3H	CATGTGAGGACTGGGGCATT	CACAATCTCTCTCCAGTCCCG
evm.model.Contig306.27	MT495417	OfDFR	CCAACATTAGTAGTTGGTCCATTCA	AAGAATATATGAGCGTCGCATAGAT
evm.model.Contig583.8	MT495415	OfANS	GGCTAACGTGGTGAATCCGA	CCCTTGTCGCACTTTTCTTCC
evm.model.Contig11.137	MT495422	OfUGT	ACTCTGTGTAGCTAAGCCGCG	CTCTAACGACAATCTTGCTTGTGTT
evm.model.Contig47.12	MT495419	OfHYB	TAAAGCTCTCTGGCACGCAT	ACGAGAGGAGGGTTATGGCT
evm.model.Contig71.184	MT495423	OfZEP	TCACCCAACTTCCCTGTTCG	CGCGTTGGTAGACTTTGGTG
evm.model.Contig42.15	MT495421	OfPOR	GTACCTCCAAAGGCGAACCT	ACGGTGAAACTCTTGCTATCCT
evm.model.Contig477.31	MT495416	OfCAO	CGGAGAAGGAGCCTGGAT	ACCCAAGGTTCCTCGAAGC
evm.model.Contig199.61	MT481993	OfActin	TTCAATAAACATGACAAAGAGCCA	GTTGTAAAATCACTGCTATAAACCTCA

## Sheet: Table S3
Table S3 Summary of novel transcript
Type of novel transcript	Number
Coding transcript	30598
Noncoding transcript	6505
Novel isoform	27655
Novel gene	2943
Total	37103

## Sheet: Table S4
Table S4 Summary of assembly quality of novel coding transcript
Total number	Total length	Maximum length (bp)	Minimum length (bp)	Average length	N50 (bp)	N90 (bp)	GC (%)
30598	69629201	16555	200	2276	2743	1314	0.4026
Note: The assembly transcripts are ordered from longest to shortest, and N50 is the length of transcripts that are no less than 50% the total length, N90 is the length of transcripts that are no less than 90% the total length.
