# Supplementary material for: Biochemical and transcriptomic analyses reveal that critical genes involved in pigment biosynthesis influence leaf color changes in a new sweet osmanthus cultivar ‘Qiannan Guifei’
Source: PeerJ. 2021 Oct 8;9:e12265. doi: 10.7717/peerj.12265 (PMC8504463; doi:10.7717/peerj.12265)
Supplement: Supplemental Information 3 — Table S5 Up-regulated DEGs in R vs YG group. Table S6 Down-regulated DEGs in R vs YG group. Table S7 Up-regulated DEGs in R vs G group. Table S8 Down-regulated DEGs in R vs G group. Table S9 Up-regulated DEGs in YG vs G group. Table S10 Down-regulated DEG [file peerj-09-12265-s003.xlsx]

## Sheet: Tabe S5
Table S5 Up-regulated DEGs in R vs YG group
Gene ID	R FPKM	YG FPKM	log2(YG/R)	Q-value(R-vs-YG)	P-value(R-vs-YG)	Nr	GO	Kegg Orthology
BGI_novel_G000014	0.12	8.095	6.06511	1.02957e-154	4.39077e-155		GO:0044425//membrane part;GO:0031224//intrinsic component of membrane;GO:0016020//membrane;GO:0016021//integral component of membrane;GO:0003824//catalytic activity;GO:0016301//kinase activity;GO:0016740//transferase activity;GO:0016772//transferase activity, transferring phosphorus-containing groups;	K13420//LRR receptor-like serine/threonine-protein kinase FLS2 [EC:2.7.11.1]+ko04016//MAPK signaling pathway - plant+ko04626//Plant-pathogen interaction
BGI_novel_G000015	0.455	3.52	3.00365	0.00016245	0.000568164
BGI_novel_G000017	0.16	2.65	4.08102	1.95671e-50	2.04687e-50			K13420//LRR receptor-like serine/threonine-protein kinase FLS2 [EC:2.7.11.1]+ko04016//MAPK signaling pathway - plant+ko04626//Plant-pathogen interaction
BGI_novel_G000022	9.945	742.79	6.23346	0	0		GO:0042221//response to chemical;GO:0009415//response to water;GO:0006950//response to stress;GO:0009628//response to abiotic stimulus;GO:0050896//response to stimulus;GO:0001101//response to acid chemical;GO:1901700//response to oxygen-containing compound;GO:0010035//response to inorganic substance;
BGI_novel_G000025	0.57	2.975	2.38906	2.98306e-07	8.68602e-07
BGI_novel_G000028	0	2.545	5.41869	7.75884e-07	2.31042e-06		GO:0016773//phosphotransferase activity, alcohol group as acceptor;GO:0097367//carbohydrate derivative binding;GO:0016772//transferase activity, transferring phosphorus-containing groups;GO:0017076//purine nucleotide binding;GO:0004674//protein serine/threonine kinase activity;GO:0003824//catalytic activity;GO:0036094//small molecule binding;GO:0032553//ribonucleotide binding;GO:1901265//nucleosi…	K13414//mitogen-activated protein kinase kinase kinase 1 [EC:2.7.11.25]+ko04016//MAPK signaling pathway - plant+ko04626//Plant-pathogen interaction
BGI_novel_G000029	0.045	0.72	3.89489	2.87197e-05	9.50958e-05			K15803//(-)-germacrene D synthase [EC:4.2.3.75]+ko00909//Sesquiterpenoid and triterpenoid biosynthesis
BGI_novel_G000035	2.105	12.985	2.62123	2.32355e-61	2.12634e-61		GO:0140096//catalytic activity, acting on a protein;GO:0019787//ubiquitin-like protein transferase activity;GO:0003824//catalytic activity;GO:0016740//transferase activity;GO:0004842//ubiquitin-protein transferase activity;	K08332//vacuolar protein 8;K04733//interleukin-1 receptor-associated kinase 4 [EC:2.7.11.1];K10260//F-box and WD-40 domain protein 7+ko04120//Ubiquitin mediated proteolysis
BGI_novel_G000036	0.075	0.805	3.45431	5.31295e-10	1.35737e-09			K01904//4-coumarate--CoA ligase [EC:6.2.1.12]+ko00130//Ubiquinone and other terpenoid-quinone biosynthesis+ko01100//Metabolic pathways+ko01110//Biosynthesis of secondary metabolites+ko00940//Phenylpropanoid biosynthesis+ko00360//Phenylalanine metabolism
BGI_novel_G000051	0.77	1.57	1.02825	0.000884409	0.00331265		GO:0016021//integral component of membrane;GO:0016020//membrane;GO:0031224//intrinsic component of membrane;GO:0044425//membrane part;	K17345//tetraspanin-5
BGI_novel_G000073	0.81	1.94	1.24876	0.000417858	0.00151725		GO:0005488//binding;GO:0005515//protein binding;GO:0046983//protein dimerization activity;
BGI_novel_G000074	4.285	15.02	1.81244	5.32994e-21	9.51162e-21
BGI_novel_G000080	0	4.805	8.19479	4.68525e-31	6.70379e-31		GO:0006807//nitrogen compound metabolic process;GO:0009058//biosynthetic process;GO:0034654//nucleobase-containing compound biosynthetic process;GO:0046483//heterocycle metabolic process;GO:0008152//metabolic process;GO:0019438//aromatic compound biosynthetic process;GO:0055086//nucleobase-containing small molecule metabolic process;GO:0005975//carbohydrate metabolic process;GO:0009225//nucleotid…	K01809//mannose-6-phosphate isomerase [EC:5.3.1.8]+ko00520//Amino sugar and nucleotide sugar metabolism+ko01100//Metabolic pathways+ko00051//Fructose and mannose metabolism+ko01110//Biosynthesis of secondary metabolites
BGI_novel_G000088	0.66	3.705	2.51024	4.42536e-20	8.08937e-20			K07407//alpha-galactosidase [EC:3.2.1.22]+ko00603//Glycosphingolipid biosynthesis - globo and isoglobo series+ko00600//Sphingolipid metabolism+ko01100//Metabolic pathways+ko00052//Galactose metabolism+ko00561//Glycerolipid metabolism
BGI_novel_G000090	9.735	23.5	1.26334	5.17248e-26	8.18261e-26		GO:0031224//intrinsic component of membrane;GO:0016021//integral component of membrane;GO:0005623//cell;GO:0044464//cell part;GO:0005886//plasma membrane;GO:0016020//membrane;GO:0071944//cell periphery;GO:0044425//membrane part;
BGI_novel_G000091	1.115	5.215	2.22669	2.67203e-19	4.98072e-19		GO:0010556//regulation of macromolecule biosynthetic process;GO:2001141//regulation of RNA biosynthetic process;GO:0031326//regulation of cellular biosynthetic process;GO:0051252//regulation of RNA metabolic process;GO:0019219//regulation of nucleobase-containing compound metabolic process;GO:0051171//regulation of nitrogen compound metabolic process;GO:0065007//biological regulation;GO:0080090//…	K09326//homeobox protein OTX1;K20043//clathrin coat assembly protein AP180;K16222//Dof zinc finger protein DOF5.5+ko04712//Circadian rhythm - plant
BGI_novel_G000092	0.29	2.935	3.31915	2.92645e-12	6.8054e-12		GO:0006914//autophagy;GO:0044248//cellular catabolic process;GO:0009987//cellular process;GO:0061919//process utilizing autophagic mechanism;GO:0008152//metabolic process;GO:0044237//cellular metabolic process;GO:0009056//catabolic process;	K19730//autophagy-related protein 101+ko04136//Autophagy - other
BGI_novel_G000093	10.08	38.1	1.92031	1.02417e-98	6.4945e-99		GO:0009056//catabolic process;GO:0044248//cellular catabolic process;GO:0061919//process utilizing autophagic mechanism;GO:0009987//cellular process;GO:0008152//metabolic process;GO:0044237//cellular metabolic process;GO:0006914//autophagy;	K19730//autophagy-related protein 101+ko04136//Autophagy - other
BGI_novel_G000095	3.715	7.425	1.00154	5.50983e-26	8.72807e-26		GO:0006793//phosphorus metabolic process;GO:0019637//organophosphate metabolic process;GO:0044237//cellular metabolic process;GO:0071704//organic substance metabolic process;GO:0009987//cellular process;GO:0006002//fructose 6-phosphate metabolic process;GO:1901135//carbohydrate derivative metabolic process;GO:0006796//phosphate-containing compound metabolic process;GO:0008152//metabolic process;G…	K03504//DNA polymerase delta subunit 3+ko03420//Nucleotide excision repair+ko03030//DNA replication+ko03440//Homologous recombination+ko03410//Base excision repair+ko03430//Mismatch repair;K00850//6-phosphofructokinase 1 [EC:2.7.1.11]+ko00010//Glycolysis / Gluconeogenesis+ko00030//Pentose phosphate pathway+ko01230//Biosynthesis of amino acids+ko03018//RNA degradation+ko01100//Metabolic pathways+k…
BGI_novel_G000099	0	0.315	5.27866	2.29543e-06	7.06328e-06		GO:0006796//phosphate-containing compound metabolic process;GO:0008152//metabolic process;GO:0044237//cellular metabolic process;GO:1901135//carbohydrate derivative metabolic process;GO:0019637//organophosphate metabolic process;GO:0006793//phosphorus metabolic process;GO:0071704//organic substance metabolic process;GO:0006002//fructose 6-phosphate metabolic process;GO:0009987//cellular process;G…	K03504//DNA polymerase delta subunit 3+ko03420//Nucleotide excision repair+ko03030//DNA replication+ko03440//Homologous recombination+ko03410//Base excision repair+ko03430//Mismatch repair;K00850//6-phosphofructokinase 1 [EC:2.7.1.11]+ko00010//Glycolysis / Gluconeogenesis+ko00030//Pentose phosphate pathway+ko01230//Biosynthesis of amino acids+ko03018//RNA degradation+ko01100//Metabolic pathways+k…
BGI_novel_G000100	2.29	4.7	1.03831	4.66692e-13	1.05448e-12		GO:0006793//phosphorus metabolic process;GO:0019637//organophosphate metabolic process;GO:0006002//fructose 6-phosphate metabolic process;GO:0008152//metabolic process;GO:1901135//carbohydrate derivative metabolic process;GO:0009987//cellular process;GO:0044237//cellular metabolic process;GO:0006796//phosphate-containing compound metabolic process;GO:0071704//organic substance metabolic process;G…	K03504//DNA polymerase delta subunit 3+ko03420//Nucleotide excision repair+ko03030//DNA replication+ko03440//Homologous recombination+ko03410//Base excision repair+ko03430//Mismatch repair;K00850//6-phosphofructokinase 1 [EC:2.7.1.11]+ko00010//Glycolysis / Gluconeogenesis+ko00030//Pentose phosphate pathway+ko01230//Biosynthesis of amino acids+ko03018//RNA degradation+ko01100//Metabolic pathways+k…
BGI_novel_G000101	3.255	298.935	6.4973	0	0			K22995//(+)-piperitol/(+)-sesamin synthase [EC:1.14.19.74]+ko00999//Biosynthesis of secondary metabolites - unclassified+ko01110//Biosynthesis of secondary metabolites;K13260//isoflavone/4'-methoxyisoflavone 2'-hydroxylase [EC:1.14.14.90 1.14.14.89]+ko01110//Biosynthesis of secondary metabolites+ko00943//Isoflavonoid biosynthesis
BGI_novel_G000112	0.215	2.52	3.55619	1.39802e-08	3.80776e-08			K08867//WNK lysine deficient protein kinase [EC:2.7.11.1];K06066//CBF1 interacting corepressor;K01176//alpha-amylase [EC:3.2.1.1]+ko01100//Metabolic pathways+ko00500//Starch and sucrose metabolism
BGI_novel_G000114	0	1.29	5.74695	4.07488e-08	1.13515e-07			K18835//WRKY transcription factor 2+ko04626//Plant-pathogen interaction;K13424//WRKY transcription factor 33+ko04016//MAPK signaling pathway - plant+ko04626//Plant-pathogen interaction
BGI_novel_G000115	0	2.69	6.73744	7.09366e-14	1.55944e-13		GO:0090304//nucleic acid metabolic process;GO:0018130//heterocycle biosynthetic process;GO:0046483//heterocycle metabolic process;GO:0044237//cellular metabolic process;GO:0044271//cellular nitrogen compound biosynthetic process;GO:0071704//organic substance metabolic process;GO:0006725//cellular aromatic compound metabolic process;GO:0043170//macromolecule metabolic process;GO:0010467//gene expr…	K13424//WRKY transcription factor 33+ko04016//MAPK signaling pathway - plant+ko04626//Plant-pathogen interaction;K18835//WRKY transcription factor 2+ko04626//Plant-pathogen interaction
BGI_novel_G000119	0	3.295	5.32481	1.62223e-06	4.93749e-06		GO:0005488//binding;GO:0036094//small molecule binding;GO:0043168//anion binding;GO:0004672//protein kinase activity;GO:0030554//adenyl nucleotide binding;GO:0032555//purine ribonucleotide binding;GO:0005524//ATP binding;GO:0097367//carbohydrate derivative binding;GO:0000166//nucleotide binding;GO:0032559//adenyl ribonucleotide binding;GO:0140096//catalytic activity, acting on a protein;GO:000814…	K04688//ribosomal protein S6 kinase beta [EC:2.7.11.1]
BGI_novel_G000120	1.47	16.285	3.47239	1.06947e-228	3.10654e-229			K15255//ATP-dependent DNA helicase PIF1 [EC:3.6.4.12]
BGI_novel_G000121	0.33	2.33	2.82874	1.4367e-08	3.91574e-08
BGI_novel_G000122	0	1.075	7.47701	6.97587e-21	1.24915e-20
BGI_novel_G000123	0.26	0.99	1.94651	5.159e-08	1.4433e-07
BGI_novel_G000125	7.105	25.18	1.8191	1.13312e-107	6.67806e-108		GO:0016020//membrane;GO:0044425//membrane part;GO:0031224//intrinsic component of membrane;GO:0016021//integral component of membrane;	K10664//E3 ubiquitin-protein ligase ATL6/9/15/31/42/55 [EC:2.3.2.27];K19041//E3 ubiquitin-protein ligase RNF38/44 [EC:2.3.2.27]
BGI_novel_G000128	0.39	1.28	1.74884	0.00068204	0.00252454			K17422//large subunit ribosomal protein L41
BGI_novel_G000132	1.42	10.255	2.86114	1.52519e-22	2.6146e-22
BGI_novel_G000134	5.17	58.615	3.48686	2.61978e-129	1.33142e-129		GO:0044425//membrane part;GO:0031224//intrinsic component of membrane;GO:0016021//integral component of membrane;GO:0016020//membrane;
BGI_novel_G000162	0.83	1.97	1.25784	4.93712e-11	1.20802e-10			K03006//DNA-directed RNA polymerase II subunit RPB1 [EC:2.7.7.6]+ko03020//RNA polymerase;K12447//UDP-sugar pyrophosphorylase [EC:2.7.7.64]+ko00520//Amino sugar and nucleotide sugar metabolism+ko00040//Pentose and glucuronate interconversions+ko01100//Metabolic pathways+ko00052//Galactose metabolism+ko00053//Ascorbate and aldarate metabolism;K03549//KUP system potassium uptake protein;K01528//dyna…
BGI_novel_G000163	0.045	2.975	6.0275	7.39036e-17	1.47492e-16
BGI_novel_G000164	0	0.505	4.96367	1.94318e-05	6.35112e-05
BGI_novel_G000165	0.09	2.06	4.44796	1.18366e-06	3.56847e-06
BGI_novel_G000176	1.64	4.095	1.32624	3.51637e-10	8.9155e-10
BGI_novel_G000181	0.095	3.165	5.11913	1.20806e-17	2.36075e-17
BGI_novel_G000182	0.45	1.18	1.38627	3.24066e-06	1.0065e-05			K03006//DNA-directed RNA polymerase II subunit RPB1 [EC:2.7.7.6]+ko03020//RNA polymerase;K03549//KUP system potassium uptake protein
BGI_novel_G000193	0.835	1.68	1.0038	0.00033656	0.00121306			K23145//scopoletin 8-hydroxylase [EC:1.14.11.60];K06892//feruloyl-CoA ortho-hydroxylase [EC:1.14.11.-]+ko01110//Biosynthesis of secondary metabolites+ko00940//Phenylpropanoid biosynthesis;K04125//gibberellin 2beta-dioxygenase [EC:1.14.11.13]+ko00904//Diterpenoid biosynthesis+ko01110//Biosynthesis of secondary metabolites
BGI_novel_G000195	0.44	1.55	1.81278	4.12746e-08	1.14998e-07			K23145//scopoletin 8-hydroxylase [EC:1.14.11.60];K04125//gibberellin 2beta-dioxygenase [EC:1.14.11.13]+ko00904//Diterpenoid biosynthesis+ko01110//Biosynthesis of secondary metabolites;K06892//feruloyl-CoA ortho-hydroxylase [EC:1.14.11.-]+ko01110//Biosynthesis of secondary metabolites+ko00940//Phenylpropanoid biosynthesis
BGI_novel_G000199	1.695	5.095	1.58735	1.03178e-07	2.931e-07			K23145//scopoletin 8-hydroxylase [EC:1.14.11.60];K06892//feruloyl-CoA ortho-hydroxylase [EC:1.14.11.-]+ko01110//Biosynthesis of secondary metabolites+ko00940//Phenylpropanoid biosynthesis
BGI_novel_G000207	0.415	1.505	1.8623	5.33147e-07	1.5731e-06
BGI_novel_G000208	0.14	1.82	3.72125	1.2279e-09	3.18473e-09			K05665//ATP-binding cassette, subfamily C (CFTR/MRP), member 1 [EC:7.6.2.3]+ko02010//ABC transporters
BGI_novel_G000211	0.035	1.075	4.95474	7.5761e-16	1.56107e-15			K09338//homeobox-leucine zipper protein;K03686//molecular chaperone DnaJ;K19347//SUN domain-containing protein 1/2
BGI_novel_G000213	8.195	22.89	1.47889	3.05758e-39	3.78106e-39			K02325//DNA polymerase epsilon subunit 2 [EC:2.7.7.7]+ko03420//Nucleotide excision repair+ko03030//DNA replication+ko03410//Base excision repair
BGI_novel_G000214	3.695	9.41	1.35318	7.02499e-32	9.87337e-32			K02325//DNA polymerase epsilon subunit 2 [EC:2.7.7.7]+ko03420//Nucleotide excision repair+ko03030//DNA replication+ko03410//Base excision repair
BGI_novel_G000217	1.16	3.12	1.45877	2.92443e-05	9.69321e-05
BGI_novel_G000221	0.8	2.805	1.81046	9.05226e-10	2.3358e-09		GO:0044424//intracellular part;GO:0005623//cell;GO:0005622//intracellular;GO:0005634//nucleus;GO:0043231//intracellular membrane-bounded organelle;GO:0043226//organelle;GO:0043227//membrane-bounded organelle;GO:0044464//cell part;GO:0043229//intracellular organelle;GO:0005488//binding;GO:0097159//organic cyclic compound binding;GO:0003677//DNA binding;GO:1901363//heterocyclic compound binding;GO:…	K11296//high mobility group protein B3
BGI_novel_G000228	0.34	3.81	3.45459	5.23977e-12	1.22971e-11			K15747//beta-ring hydroxylase [EC:1.14.-.-]+ko00906//Carotenoid biosynthesis+ko01100//Metabolic pathways+ko01110//Biosynthesis of secondary metabolites
BGI_novel_G000233	7.215	20.94	1.53466	3.41805e-68	2.89553e-68		GO:0044425//membrane part;GO:0016020//membrane;GO:0031224//intrinsic component of membrane;GO:0016021//integral component of membrane;	K14209//solute carrier family 36 (proton-coupled amino acid transporter)
BGI_novel_G000238	0.61	6.15	3.32706	4.65137e-25	7.52739e-25
BGI_novel_G000249	15.36	293.18	4.23677	0	0
BGI_novel_G000250	1.215	28.19	4.50347	3.81821e-72	3.10442e-72
BGI_novel_G000251	10.06	208.855	4.35295	0	0
BGI_novel_G000252	46.955	1321.26	4.79139	0	0
BGI_novel_G000253	14.485	240.46	4.034	0	0
BGI_novel_G000259	0.2	1.41	2.7972	3.81764e-06	1.19007e-05		GO:0020037//heme binding;GO:0005488//binding;GO:0046872//metal ion binding;GO:0046914//transition metal ion binding;GO:0003824//catalytic activity;GO:0046906//tetrapyrrole binding;GO:0016491//oxidoreductase activity;GO:0016705//oxidoreductase activity, acting on paired donors, with incorporation or reduction of molecular oxygen;GO:0043167//ion binding;GO:0005506//iron ion binding;GO:0043169//cati…	K07428//cytochrome P450 family 4 subfamily X [EC:1.14.14.1];K07425//long-chain fatty acid omega-monooxygenase [EC:1.14.14.80]+ko00590//Arachidonic acid metabolism+ko01100//Metabolic pathways+ko00071//Fatty acid degradation
BGI_novel_G000262	12.66	28.945	1.20498	2.10363e-11	5.06552e-11
BGI_novel_G000282	0.955	85.53	6.48478	0	0			K04733//interleukin-1 receptor-associated kinase 4 [EC:2.7.11.1]
BGI_novel_G000288	0.11	15.865	7.14115	3.64129e-63	3.27103e-63
BGI_novel_G000291	0.015	0.235	4.09676	1.80706e-05	5.89407e-05
BGI_novel_G000294	0	34.75	7.50615	3.19128e-21	5.66286e-21			K00993//ethanolaminephosphotransferase [EC:2.7.8.1]+ko00440//Phosphonate and phosphinate metabolism+ko01100//Metabolic pathways+ko01110//Biosynthesis of secondary metabolites+ko00564//Glycerophospholipid metabolism+ko00565//Ether lipid metabolism
BGI_novel_G000298	0	2.23	8.59637	1.00136e-38	1.2484e-38
BGI_novel_G000299	0.3	2.49	3.05598	1.40481e-30	2.02679e-30			K05658//ATP-binding cassette, subfamily B (MDR/TAP), member 1 [EC:7.6.2.2]+ko02010//ABC transporters
BGI_novel_G000302	3.89	7.88	1.01368	7.26096e-12	1.71415e-11			K14819//dual specificity phosphatase 12 [EC:3.1.3.16 3.1.3.48];K05863//solute carrier family 25 (mitochondrial adenine nucleotide translocator), member 4/5/6/31;K19619//tyrosyl-DNA phosphodiesterase 2 [EC:3.1.4.-]
BGI_novel_G000308	0.035	1.505	5.41001	1.14825e-11	2.73321e-11		GO:0043231//intracellular membrane-bounded organelle;GO:0044424//intracellular part;GO:0044464//cell part;GO:0005622//intracellular;GO:0043226//organelle;GO:0043229//intracellular organelle;GO:0043227//membrane-bounded organelle;GO:0005623//cell;GO:0005634//nucleus;GO:0003677//DNA binding;GO:1901363//heterocyclic compound binding;GO:0003676//nucleic acid binding;GO:0005488//binding;GO:0097159//or…
BGI_novel_G000318	3.3	7.685	1.21637	1.82493e-07	5.25497e-07			K04454//MADS-box transcription enhancer factor 2C;K12412//pheromone receptor transcription factor;K09260//MADS-box transcription enhancer factor 2A
BGI_novel_G000322	0	8.815	8.37233	3.04057e-34	4.09082e-34		GO:0044237//cellular metabolic process;GO:0009987//cellular process;GO:0000377//RNA splicing, via transesterification reactions with bulged adenosine as nucleophile;GO:0006397//mRNA processing;GO:0006807//nitrogen compound metabolic process;GO:0000375//RNA splicing, via transesterification reactions;GO:0046483//heterocycle metabolic process;GO:0008152//metabolic process;GO:0006725//cellular aroma…	K12625//U6 snRNA-associated Sm-like protein LSm6+ko03040//Spliceosome+ko03018//RNA degradation
BGI_novel_G000329	1.255	3.875	1.62455	6.89921e-06	2.18453e-05
BGI_novel_G000337	12.285	35.575	1.52635	2.48103e-46	2.75002e-46			K04733//interleukin-1 receptor-associated kinase 4 [EC:2.7.11.1];K01051//pectinesterase [EC:3.1.1.11]+ko00040//Pentose and glucuronate interconversions+ko01100//Metabolic pathways
BGI_novel_G000339	0.98	28.015	4.83826	0	0			K04733//interleukin-1 receptor-associated kinase 4 [EC:2.7.11.1]
BGI_novel_G000340	2.01	13.52	2.75887	2.24129e-130	1.12707e-130			K04733//interleukin-1 receptor-associated kinase 4 [EC:2.7.11.1]
BGI_novel_G000341	16.27	119.29	2.87747	0	0			K04733//interleukin-1 receptor-associated kinase 4 [EC:2.7.11.1]
BGI_novel_G000345	0.725	3.455	2.25704	2.50166e-09	6.58323e-09			K01513//ectonucleotide pyrophosphatase/phosphodiesterase family member 1/3 [EC:3.1.4.1 3.6.1.9]+ko00740//Riboflavin metabolism+ko00230//Purine metabolism+ko00770//Pantothenate and CoA biosynthesis+ko01100//Metabolic pathways+ko00760//Nicotinate and nicotinamide metabolism+ko00500//Starch and sucrose metabolism+ko00240//Pyrimidine metabolism;K14317//nuclear pore complex protein Nup214+ko03013//RNA…
BGI_novel_G000346	0	0.62	4.54169	0.000190341	0.000670569
BGI_novel_G000357	0.325	0.96	1.56783	5.20691e-17	1.03502e-16			K01166//ribonuclease T2 [EC:3.1.27.1];K09008//NADH dehydrogenase [ubiquinone] 1 alpha subcomplex assembly factor 3
BGI_novel_G000365	0	0.38	4.68172	9.52041e-05	0.000327736			K10908//DNA-directed RNA polymerase, mitochondrial [EC:2.7.7.6]
BGI_novel_G000367	0.755	2.51	1.73651	7.6423e-05	0.000260911		GO:0022607//cellular component assembly;GO:0071840//cellular component organization or biogenesis;GO:0006511//ubiquitin-dependent protein catabolic process;GO:0044265//cellular macromolecule catabolic process;GO:0044260//cellular macromolecule metabolic process;GO:0019941//modification-dependent protein catabolic process;GO:0019538//protein metabolic process;GO:0009057//macromolecule catabolic pr…	K03029//26S proteasome regulatory subunit N10+ko03050//Proteasome
BGI_novel_G000369	3.28	6.63	1.01754	2.75352e-29	4.07025e-29			K22686//pro-apoptotic serine protease NMA111 [EC:3.4.21.-];K12447//UDP-sugar pyrophosphorylase [EC:2.7.7.64]+ko00520//Amino sugar and nucleotide sugar metabolism+ko00040//Pentose and glucuronate interconversions+ko01100//Metabolic pathways+ko00052//Galactose metabolism+ko00053//Ascorbate and aldarate metabolism;K01147//exoribonuclease II [EC:3.1.13.1];K03517//quinolinate synthase [EC:2.5.1.72]+ko…
BGI_novel_G000372	1.98	7.38	1.89539	4.57925e-11	1.11905e-10			K04733//interleukin-1 receptor-associated kinase 4 [EC:2.7.11.1];K01623//fructose-bisphosphate aldolase, class I [EC:4.1.2.13]+ko00010//Glycolysis / Gluconeogenesis+ko00030//Pentose phosphate pathway+ko01230//Biosynthesis of amino acids+ko01100//Metabolic pathways+ko00051//Fructose and mannose metabolism+ko01110//Biosynthesis of secondary metabolites+ko00710//Carbon fixation in photosynthetic org…
BGI_novel_G000373	1.085	2.88	1.40703	0.000312021	0.00111965		GO:0030001//metal ion transport;GO:0006812//cation transport;GO:0006810//transport;GO:0051234//establishment of localization;GO:0006811//ion transport;GO:0051179//localization;GO:0043169//cation binding;GO:0046872//metal ion binding;GO:0043167//ion binding;GO:0005488//binding;	K01623//fructose-bisphosphate aldolase, class I [EC:4.1.2.13]+ko00010//Glycolysis / Gluconeogenesis+ko00030//Pentose phosphate pathway+ko01230//Biosynthesis of amino acids+ko01100//Metabolic pathways+ko00051//Fructose and mannose metabolism+ko01110//Biosynthesis of secondary metabolites+ko00710//Carbon fixation in photosynthetic organisms+ko01200//Carbon metabolism;K04733//interleukin-1 receptor-…
BGI_novel_G000380	0.07	7.905	6.77873	6.79533e-75	5.37027e-75		GO:0051179//localization;GO:0034220//ion transmembrane transport;GO:0055085//transmembrane transport;GO:0030001//metal ion transport;GO:0006814//sodium ion transport;GO:0051234//establishment of localization;GO:0015672//monovalent inorganic cation transport;GO:0006812//cation transport;GO:0035725//sodium ion transmembrane transport;GO:0098660//inorganic ion transmembrane transport;GO:0006810//tra…
BGI_novel_G000391	2.49	13.185	2.40662	2.36697e-34	3.17876e-34			K10268//F-box and leucine-rich repeat protein 2/20;K15227//arogenate dehydrogenase (NADP+), plant [EC:1.3.1.78]+ko01230//Biosynthesis of amino acids+ko01100//Metabolic pathways+ko01110//Biosynthesis of secondary metabolites+ko00400//Phenylalanine, tyrosine and tryptophan biosynthesis;K14288//exportin-T+ko03013//RNA transport;K00430//peroxidase [EC:1.11.1.7]+ko01100//Metabolic pathways+ko01110//Bi…
BGI_novel_G000394	0.86	2.48	1.53733	8.61014e-05	0.000294887
BGI_novel_G000395	2.53	13.56	2.4141	1.14689e-51	1.18046e-51			K11446//histone demethylase JARID1 [EC:1.14.11.-];K00103//L-gulonolactone oxidase [EC:1.1.3.8]+ko01100//Metabolic pathways+ko00053//Ascorbate and aldarate metabolism;K13336//peroxin-3+ko04146//Peroxisome;K21844//protein FAM126;K09338//homeobox-leucine zipper protein
BGI_novel_G000396	0.13	2.395	4.19075	9.36799e-19	1.77141e-18			K11446//histone demethylase JARID1 [EC:1.14.11.-];K00103//L-gulonolactone oxidase [EC:1.1.3.8]+ko01100//Metabolic pathways+ko00053//Ascorbate and aldarate metabolism;K13336//peroxin-3+ko04146//Peroxisome;K21844//protein FAM126;K09338//homeobox-leucine zipper protein
BGI_novel_G000401	0.09	5.14	5.84146	4.35884e-15	9.20994e-15			K03283//heat shock 70kDa protein 1/2/6/8+ko03040//Spliceosome+ko04144//Endocytosis+ko04141//Protein processing in endoplasmic reticulum
BGI_novel_G000402	0.38	3.505	3.17327	1.00611e-12	2.30171e-12			K17609//nucleoredoxin [EC:1.8.1.8]
BGI_novel_G000412	2.835	6.585	1.21815	1.13024e-06	3.40309e-06
BGI_novel_G000415	0.415	5.6	3.74062	1.04665e-22	1.78689e-22		GO:0071705//nitrogen compound transport;GO:0033036//macromolecule localization;GO:0051234//establishment of localization;GO:0006810//transport;GO:0015031//protein transport;GO:0008104//protein localization;GO:0042886//amide transport;GO:0045184//establishment of protein localization;GO:0071702//organic substance transport;GO:0051179//localization;GO:0015833//peptide transport;GO:0030133//transpor…	K19995//secretory carrier-associated membrane protein
BGI_novel_G000425	0	0.95	4.7972	5.12813e-05	0.000173109		GO:0044425//membrane part;GO:0016021//integral component of membrane;GO:0031224//intrinsic component of membrane;GO:0016020//membrane;
BGI_novel_G000429	1.35	4.395	1.71555	4.22139e-07	1.23788e-06		GO:0003824//catalytic activity;GO:0016741//transferase activity, transferring one-carbon groups;GO:0008168//methyltransferase activity;GO:0016740//transferase activity;	K23151//methyltransferase-like protein 23 [EC:2.1.1.-]
BGI_novel_G000435	11.76	25.545	1.11715	2.03762e-28	3.06773e-28			K23151//methyltransferase-like protein 23 [EC:2.1.1.-]
BGI_novel_G000442	0.34	3.75	3.47894	1.03919e-50	1.08421e-50		GO:0022414//reproductive process;GO:0007154//cell communication;GO:0009875//pollen-pistil interaction;GO:0009987//cellular process;GO:0044706//multi-multicellular organism process;GO:0051704//multi-organism process;GO:0048544//recognition of pollen;GO:0032501//multicellular organismal process;GO:0008037//cell recognition;GO:0009856//pollination;GO:0000003//reproduction;GO:0031224//intrinsic compo…	K04733//interleukin-1 receptor-associated kinase 4 [EC:2.7.11.1]
BGI_novel_G000443	4.495	28.895	2.68857	1.22079e-274	2.90812e-275		GO:0032501//multicellular organismal process;GO:0022414//reproductive process;GO:0048544//recognition of pollen;GO:0000003//reproduction;GO:0008037//cell recognition;GO:0007154//cell communication;GO:0051704//multi-organism process;GO:0009856//pollination;GO:0009875//pollen-pistil interaction;GO:0044706//multi-multicellular organism process;GO:0009987//cellular process;GO:0031224//intrinsic compo…	K04733//interleukin-1 receptor-associated kinase 4 [EC:2.7.11.1]
BGI_novel_G000444	1.74	19.01	3.44961	1.5029e-231	4.30813e-232		GO:0007154//cell communication;GO:0048544//recognition of pollen;GO:0009856//pollination;GO:0000003//reproduction;GO:0009987//cellular process;GO:0022414//reproductive process;GO:0008037//cell recognition;GO:0009875//pollen-pistil interaction;GO:0044706//multi-multicellular organism process;GO:0051704//multi-organism process;GO:0032501//multicellular organismal process;GO:0044425//membrane part;G…	K04733//interleukin-1 receptor-associated kinase 4 [EC:2.7.11.1]
BGI_novel_G000456	0.73	5.415	2.8895	3.2508e-15	6.83196e-15			K14486//auxin response factor+ko04075//Plant hormone signal transduction
BGI_novel_G000466	0	0.8	7.06	1.40821e-16	2.83603e-16		GO:0008152//metabolic process;GO:0003824//catalytic activity;	K18660//malonyl-CoA/methylmalonyl-CoA synthetase [EC:6.2.1.-]+ko00280//Valine, leucine and isoleucine degradation
BGI_novel_G000474	0	1.215	5.26669	2.50711e-06	7.73841e-06
BGI_novel_G000476	0.66	3.285	2.32823	6.25935e-06	1.97676e-05
BGI_novel_G000484	0.25	2.17	3.11666	4.85187e-15	1.02635e-14
BGI_novel_G000485	0.205	1.41	2.7972	0.000533519	0.00195686			K19791//iron transport multicopper oxidase
BGI_novel_G000487	0.025	0.875	5.10979	0.00024846	0.000884357			K14007//protein transport protein SEC24+ko04141//Protein processing in endoplasmic reticulum
BGI_novel_G000490	1.005	2.885	1.52253	0.000323507	0.00116299		GO:0003723//RNA binding;GO:0097159//organic cyclic compound binding;GO:1901363//heterocyclic compound binding;GO:0005488//binding;GO:0003676//nucleic acid binding;
BGI_novel_G000496	2.26	9.52	2.07477	4.32431e-111	2.48115e-111
BGI_novel_G000497	0.23	0.825	1.85151	6.77181e-06	2.14245e-05
BGI_novel_G000498	0.1	0.53	2.3615	2.40944e-05	7.93507e-05
BGI_novel_G000505	1.435	4.22	1.55619	5.57826e-18	1.07901e-17		GO:0016020//membrane;GO:0031224//intrinsic component of membrane;GO:0016021//integral component of membrane;GO:0044425//membrane part;GO:0030554//adenyl nucleotide binding;GO:0032559//adenyl ribonucleotide binding;GO:0043167//ion binding;GO:0036094//small molecule binding;GO:1901363//heterocyclic compound binding;GO:0016301//kinase activity;GO:0000166//nucleotide binding;GO:0140096//catalytic act…	K04733//interleukin-1 receptor-associated kinase 4 [EC:2.7.11.1]
BGI_novel_G000507	1.535	8.63	2.48853	4.64453e-39	5.75984e-39		GO:0080090//regulation of primary metabolic process;GO:1901360//organic cyclic compound metabolic process;GO:0051252//regulation of RNA metabolic process;GO:0034645//cellular macromolecule biosynthetic process;GO:0009058//biosynthetic process;GO:0019438//aromatic compound biosynthetic process;GO:0044249//cellular biosynthetic process;GO:0006807//nitrogen compound metabolic process;GO:0060255//reg…	K03028//26S proteasome regulatory subunit N1+ko03050//Proteasome
BGI_novel_G000508	0	6.795	8.44194	1.4029e-35	1.84418e-35		GO:0006139//nucleobase-containing compound metabolic process;GO:1901362//organic cyclic compound biosynthetic process;GO:0097659//nucleic acid-templated transcription;GO:0032774//RNA biosynthetic process;GO:0006355//regulation of transcription, DNA-templated;GO:0090304//nucleic acid metabolic process;GO:0031323//regulation of cellular metabolic process;GO:0008152//metabolic process;GO:0006351//tr…	K03028//26S proteasome regulatory subunit N1+ko03050//Proteasome
BGI_novel_G000509	1.215	5.67	2.23295	1.78856e-25	2.86521e-25		GO:0016020//membrane;	K13412//calcium-dependent protein kinase [EC:2.7.11.1]+ko04626//Plant-pathogen interaction;K01593//aromatic-L-amino-acid/L-tryptophan decarboxylase [EC:4.1.1.28 4.1.1.105]+ko00380//Tryptophan metabolism+ko00901//Indole alkaloid biosynthesis+ko00965//Betalain biosynthesis+ko00350//Tyrosine metabolism+ko01100//Metabolic pathways+ko00950//Isoquinoline alkaloid biosynthesis+ko01110//Biosynthesis of s…
BGI_novel_G000510	2.225	6.595	1.56388	1.00055e-17	1.94974e-17		GO:0016020//membrane;	K13412//calcium-dependent protein kinase [EC:2.7.11.1]+ko04626//Plant-pathogen interaction;K01593//aromatic-L-amino-acid/L-tryptophan decarboxylase [EC:4.1.1.28 4.1.1.105]+ko00380//Tryptophan metabolism+ko00901//Indole alkaloid biosynthesis+ko00965//Betalain biosynthesis+ko00350//Tyrosine metabolism+ko01100//Metabolic pathways+ko00950//Isoquinoline alkaloid biosynthesis+ko01110//Biosynthesis of s…
BGI_novel_G000514	0	0.765	6.53505	2.04626e-12	4.72916e-12		GO:0044281//small molecule metabolic process;GO:1901564//organonitrogen compound metabolic process;GO:0043604//amide biosynthetic process;GO:0006082//organic acid metabolic process;GO:0016070//RNA metabolic process;GO:0071704//organic substance metabolic process;GO:0010467//gene expression;GO:0009987//cellular process;GO:0006520//cellular amino acid metabolic process;GO:0090304//nucleic acid meta…	K01868//threonyl-tRNA synthetase [EC:6.1.1.3]+ko00970//Aminoacyl-tRNA biosynthesis
BGI_novel_G000517	0	0.71	6.62471	4.84072e-13	1.09463e-12		GO:0006435//threonyl-tRNA aminoacylation;GO:0010467//gene expression;GO:0006725//cellular aromatic compound metabolic process;GO:0009058//biosynthetic process;GO:0043039//tRNA aminoacylation;GO:0034660//ncRNA metabolic process;GO:0043604//amide biosynthetic process;GO:0006418//tRNA aminoacylation for protein translation;GO:0006412//translation;GO:0006082//organic acid metabolic process;GO:0019752…	K01868//threonyl-tRNA synthetase [EC:6.1.1.3]+ko00970//Aminoacyl-tRNA biosynthesis
BGI_novel_G000520	0.22	7.325	5.03977	6.37322e-46	7.11776e-46		GO:0016020//membrane;
BGI_novel_G000521	3.49	18.845	2.43547	6.086e-78	4.66834e-78		GO:0016020//membrane;	K13412//calcium-dependent protein kinase [EC:2.7.11.1]+ko04626//Plant-pathogen interaction
BGI_novel_G000523	8.725	20.145	1.2112	8.44255e-91	5.76128e-91
BGI_novel_G000524	1.18	2.545	1.11213	9.747e-14	2.15092e-13		GO:0097159//organic cyclic compound binding;GO:0003676//nucleic acid binding;GO:1901363//heterocyclic compound binding;GO:0003723//RNA binding;GO:0005488//binding;	K15153//mediator of RNA polymerase II transcription subunit 31;K02868//large subunit ribosomal protein L11e+ko03010//Ribosome
BGI_novel_G000526	0.17	0.585	1.80352	1.54482e-07	4.43233e-07		GO:0097159//organic cyclic compound binding;GO:0003723//RNA binding;GO:0005488//binding;GO:1901363//heterocyclic compound binding;GO:0003676//nucleic acid binding;	K02868//large subunit ribosomal protein L11e+ko03010//Ribosome;K15153//mediator of RNA polymerase II transcription subunit 31
BGI_novel_G000533	0	18.7	10.4492	5.71706e-105	3.44013e-105
BGI_novel_G000536	40.865	93.74	1.20557	1.81301e-41	2.16167e-41
BGI_novel_G000551	0.5	3.8	2.91112	8.95661e-25	1.46082e-24		GO:0051179//localization;GO:0051234//establishment of localization;GO:0006810//transport;GO:0044464//cell part;GO:0005622//intracellular;GO:0005623//cell;	K15322//tRNA-splicing endonuclease subunit Sen2 [EC:4.6.1.16]
BGI_novel_G000554	0	0.555	5.98575	3.23042e-09	8.54196e-09			K15322//tRNA-splicing endonuclease subunit Sen2 [EC:4.6.1.16]
BGI_novel_G000555	0.67	3.265	2.30265	5.61966e-13	1.27427e-12		GO:0051179//localization;GO:0051234//establishment of localization;GO:0006810//transport;GO:0005622//intracellular;GO:0044464//cell part;GO:0005623//cell;	K15322//tRNA-splicing endonuclease subunit Sen2 [EC:4.6.1.16]
BGI_novel_G000556	0.15	0.52	1.78575	3.72165e-05	0.000124272		GO:0051234//establishment of localization;GO:0051179//localization;GO:0006810//transport;GO:0005623//cell;GO:0005622//intracellular;GO:0044464//cell part;	K15322//tRNA-splicing endonuclease subunit Sen2 [EC:4.6.1.16]
BGI_novel_G000562	0.025	6.47	7.94171	8.78236e-100	5.50872e-100
BGI_novel_G000565	0.215	1.29	2.55557	1.03407e-08	2.79625e-08			K08150//MFS transporter, SP family, solute carrier family 2 (myo-inositol transporter), member 13
BGI_novel_G000571	0.49	6.775	3.79415	2.85028e-58	2.69852e-58
BGI_novel_G000573	3.595	12.245	1.76702	2.27566e-58	2.15206e-58
BGI_novel_G000575	4.33	11.53	1.41217	3.88459e-11	9.45736e-11
BGI_novel_G000583	0.66	3.505	2.40557	1.98213e-19	3.6808e-19		GO:0003824//catalytic activity;GO:0046872//metal ion binding;GO:0005488//binding;GO:0043167//ion binding;GO:0016491//oxidoreductase activity;GO:0043169//cation binding;	K05658//ATP-binding cassette, subfamily B (MDR/TAP), member 1 [EC:7.6.2.2]+ko02010//ABC transporters;K05278//flavonol synthase [EC:1.14.20.6]+ko01100//Metabolic pathways+ko01110//Biosynthesis of secondary metabolites+ko00941//Flavonoid biosynthesis
BGI_novel_G000590	3.265	7.125	1.12857	4.67485e-26	7.39181e-26			K12812//ATP-dependent RNA helicase UAP56/SUB2 [EC:3.6.4.13]+ko03040//Spliceosome+ko03015//mRNA surveillance pathway+ko03013//RNA transport
BGI_novel_G000593	1.415	3.165	1.16526	2.29288e-09	6.02294e-09			K07052//uncharacterized protein
BGI_novel_G000596	0	0.34	4.26669	0.000626598	0.00231387		GO:0000166//nucleotide binding;GO:0016491//oxidoreductase activity;GO:0097159//organic cyclic compound binding;GO:0043167//ion binding;GO:1901265//nucleoside phosphate binding;GO:1901363//heterocyclic compound binding;GO:0048037//cofactor binding;GO:0036094//small molecule binding;GO:0050662//coenzyme binding;GO:0043168//anion binding;GO:0016614//oxidoreductase activity, acting on CH-OH group of …	K00108//choline dehydrogenase [EC:1.1.99.1]+ko01100//Metabolic pathways+ko00260//Glycine, serine and threonine metabolism
BGI_novel_G000601	1.9	4.28	1.1767	1.69293e-05	5.51121e-05			K02218//casein kinase 1 [EC:2.7.11.1];K14318//nuclear pore complex protein Nup88+ko03013//RNA transport;K00430//peroxidase [EC:1.11.1.7]+ko01100//Metabolic pathways+ko01110//Biosynthesis of secondary metabolites+ko00940//Phenylpropanoid biosynthesis;K05291//phosphatidylinositol glycan, class S+ko01100//Metabolic pathways+ko00563//Glycosylphosphatidylinositol (GPI)-anchor biosynthesis
BGI_novel_G000616	0.625	1.345	1.09676	0.000588058	0.00216463		GO:0044464//cell part;GO:0044424//intracellular part;GO:0005623//cell;GO:0044444//cytoplasmic part;GO:0005737//cytoplasm;GO:0005622//intracellular;GO:0005829//cytosol;	K20463//oxysterol-binding protein-related protein 3/6/7;K20174//oxysterol-binding protein-related protein 1/2
BGI_novel_G000618	1.46	3.71	1.33412	0.000763535	0.00283996			K03549//KUP system potassium uptake protein
BGI_novel_G000619	0.44	3.135	2.83472	1.07264e-10	2.65977e-10		GO:0009725//response to hormone;GO:0009733//response to auxin;GO:0042221//response to chemical;GO:0050896//response to stimulus;GO:0009719//response to endogenous stimulus;GO:0010033//response to organic substance;	K14488//SAUR family protein+ko04075//Plant hormone signal transduction
BGI_novel_G000622	0	0.705	4.29368	0.00056264	0.00206771			K04733//interleukin-1 receptor-associated kinase 4 [EC:2.7.11.1]
BGI_novel_G000624	1.855	4.025	1.12431	0.000975871	0.00367537
BGI_novel_G000625	0.915	6.11	2.73799	3.73011e-27	5.75379e-27		GO:0044237//cellular metabolic process;GO:0006807//nitrogen compound metabolic process;GO:0042558//pteridine-containing compound metabolic process;GO:0008152//metabolic process;GO:1901564//organonitrogen compound metabolic process;GO:0046483//heterocycle metabolic process;GO:0009987//cellular process;GO:0006725//cellular aromatic compound metabolic process;GO:0071704//organic substance metabolic …	K18980//2-methylene-furan-3-one reductase [EC:1.3.1.105]
BGI_novel_G000626	1.13	10.1	3.15867	3.38353e-53	3.41948e-53			K18980//2-methylene-furan-3-one reductase [EC:1.3.1.105]
BGI_novel_G000627	1.6	5.08	1.66872	3.04598e-14	6.60955e-14		GO:0043226//organelle;GO:0044444//cytoplasmic part;GO:0043229//intracellular organelle;GO:0005737//cytoplasm;GO:0005623//cell;GO:0009507//chloroplast;GO:0043227//membrane-bounded organelle;GO:0009536//plastid;GO:0005622//intracellular;GO:0044424//intracellular part;GO:0043231//intracellular membrane-bounded organelle;GO:0044464//cell part;GO:0043169//cation binding;GO:0008270//zinc ion binding;GO…	K18980//2-methylene-furan-3-one reductase [EC:1.3.1.105]
BGI_novel_G000640	0	1.56	7.32442	3.43856e-19	6.42794e-19			K13104//zinc finger protein 830
BGI_novel_G000665	0	0.77	5.26669	2.50711e-06	7.73841e-06
BGI_novel_G000667	0	0.69	5.80991	2.16295e-08	5.94142e-08		GO:0034641//cellular nitrogen compound metabolic process;GO:0051252//regulation of RNA metabolic process;GO:0044265//cellular macromolecule catabolic process;GO:0009057//macromolecule catabolic process;GO:0010467//gene expression;GO:0008152//metabolic process;GO:0009892//negative regulation of metabolic process;GO:0006402//mRNA catabolic process;GO:0006396//RNA processing;GO:0044237//cellular met…	K12876//RNA-binding protein 8A+ko03040//Spliceosome+ko03015//mRNA surveillance pathway+ko03013//RNA transport
BGI_novel_G000670	0.305	0.775	1.35082	0.000124856	0.000433475		GO:0051252//regulation of RNA metabolic process;GO:0044238//primary metabolic process;GO:0016071//mRNA metabolic process;GO:1903311//regulation of mRNA metabolic process;GO:0044248//cellular catabolic process;GO:0008152//metabolic process;GO:0034641//cellular nitrogen compound metabolic process;GO:0071704//organic substance metabolic process;GO:0009987//cellular process;GO:0048024//regulation of …	K12876//RNA-binding protein 8A+ko03040//Spliceosome+ko03015//mRNA surveillance pathway+ko03013//RNA transport
BGI_novel_G000671	0	0.82	5.91182	7.36493e-09	1.97795e-08		GO:0071704//organic substance metabolic process;GO:0016070//RNA metabolic process;GO:0034641//cellular nitrogen compound metabolic process;GO:1901360//organic cyclic compound metabolic process;GO:0044237//cellular metabolic process;GO:0043170//macromolecule metabolic process;GO:0006725//cellular aromatic compound metabolic process;GO:0008152//metabolic process;GO:0006139//nucleobase-containing co…	K12876//RNA-binding protein 8A+ko03040//Spliceosome+ko03015//mRNA surveillance pathway+ko03013//RNA transport
BGI_novel_G000676	0.595	1.89	1.68172	0.00031555	0.0011328		GO:0043167//ion binding;GO:0043169//cation binding;GO:0003676//nucleic acid binding;GO:0046872//metal ion binding;GO:1901363//heterocyclic compound binding;GO:0097159//organic cyclic compound binding;GO:0005488//binding;	K03549//KUP system potassium uptake protein;K12309//beta-galactosidase [EC:3.2.1.23]+ko00600//Sphingolipid metabolism+ko00604//Glycosphingolipid biosynthesis - ganglio series+ko00531//Glycosaminoglycan degradation+ko00511//Other glycan degradation+ko01100//Metabolic pathways+ko00052//Galactose metabolism;K22410//PR domain zinc finger protein 16
BGI_novel_G000684	1.105	2.53	1.19957	0.000510567	0.00186659			K15223//upstream activation factor subunit UAF30;K01681//aconitate hydratase [EC:4.2.1.3]+ko00020//Citrate cycle (TCA cycle)+ko01230//Biosynthesis of amino acids+ko01100//Metabolic pathways+ko01110//Biosynthesis of secondary metabolites+ko01210//2-Oxocarboxylic acid metabolism+ko01200//Carbon metabolism+ko00630//Glyoxylate and dicarboxylate metabolism
BGI_novel_G000704	1.905	5.765	1.60281	1.36988e-30	1.97577e-30		GO:0016021//integral component of membrane;GO:0031224//intrinsic component of membrane;GO:0044425//membrane part;GO:0016020//membrane;GO:1901265//nucleoside phosphate binding;GO:0036094//small molecule binding;GO:0016773//phosphotransferase activity, alcohol group as acceptor;GO:0030246//carbohydrate binding;GO:0008144//drug binding;GO:0030554//adenyl nucleotide binding;GO:0004672//protein kinase…	K04733//interleukin-1 receptor-associated kinase 4 [EC:2.7.11.1]
BGI_novel_G000705	0.08	1.35	4.01659	1.64375e-19	3.04565e-19		GO:0016020//membrane;GO:0016021//integral component of membrane;GO:0044425//membrane part;GO:0031224//intrinsic component of membrane;GO:0017076//purine nucleotide binding;GO:0003824//catalytic activity;GO:0008144//drug binding;GO:0032555//purine ribonucleotide binding;GO:0035639//purine ribonucleoside triphosphate binding;GO:0000166//nucleotide binding;GO:0097367//carbohydrate derivative binding…	K04733//interleukin-1 receptor-associated kinase 4 [EC:2.7.11.1]
BGI_novel_G000707	0.52	2.255	2.09893	9.32091e-13	2.1291e-12		GO:0016021//integral component of membrane;GO:0031224//intrinsic component of membrane;GO:0044425//membrane part;GO:0016020//membrane;GO:0030554//adenyl nucleotide binding;GO:0030247//polysaccharide binding;GO:0043168//anion binding;GO:0140096//catalytic activity, acting on a protein;GO:0008144//drug binding;GO:0043167//ion binding;GO:1901265//nucleoside phosphate binding;GO:0016773//phosphotrans…	K04733//interleukin-1 receptor-associated kinase 4 [EC:2.7.11.1]
BGI_novel_G000708	0.19	1.22	2.64743	0.000140757	0.000490378		GO:0044425//membrane part;GO:0016021//integral component of membrane;GO:0016020//membrane;GO:0031224//intrinsic component of membrane;GO:0030247//polysaccharide binding;GO:0032555//purine ribonucleotide binding;GO:0036094//small molecule binding;GO:0016773//phosphotransferase activity, alcohol group as acceptor;GO:0032553//ribonucleotide binding;GO:0016772//transferase activity, transferring phos…	K04733//interleukin-1 receptor-associated kinase 4 [EC:2.7.11.1]
BGI_novel_G000709	0.215	1.925	3.15261	1.80839e-30	2.61458e-30		GO:0016021//integral component of membrane;GO:0031224//intrinsic component of membrane;GO:0044425//membrane part;GO:0016020//membrane;GO:0005488//binding;GO:0015405//P-P-bond-hydrolysis-driven transmembrane transporter activity;GO:0016787//hydrolase activity;GO:0036094//small molecule binding;GO:0005524//ATP binding;GO:0016818//hydrolase activity, acting on acid anhydrides, in phosphorus-containi…	K03006//DNA-directed RNA polymerase II subunit RPB1 [EC:2.7.7.6]+ko03020//RNA polymerase
BGI_novel_G000710	0.415	2.185	2.39325	3.4786e-19	6.50385e-19		GO:0044425//membrane part;GO:0016020//membrane;GO:0016021//integral component of membrane;GO:0031224//intrinsic component of membrane;GO:0017076//purine nucleotide binding;GO:0005524//ATP binding;GO:0005488//binding;GO:0030246//carbohydrate binding;GO:0000166//nucleotide binding;GO:0032559//adenyl ribonucleotide binding;GO:0001871//pattern binding;GO:0032553//ribonucleotide binding;GO:0043168//an…	K04733//interleukin-1 receptor-associated kinase 4 [EC:2.7.11.1]
BGI_novel_G000713	0.28	3.75	3.75278	1.81399e-68	1.53197e-68			K16302//metal transporter CNNM
BGI_novel_G000714	1.155	6.675	2.53381	9.90926e-62	9.03339e-62		GO:0044425//membrane part;GO:0016021//integral component of membrane;GO:0031224//intrinsic component of membrane;GO:0016020//membrane;	K16302//metal transporter CNNM
BGI_novel_G000715	0.17	2.22	3.7358	3.78284e-30	5.50219e-30			K16302//metal transporter CNNM
BGI_novel_G000727	0.315	1.635	2.36705	1.58629e-21	2.79132e-21		GO:0005488//binding;GO:0097159//organic cyclic compound binding;GO:0043169//cation binding;GO:1901363//heterocyclic compound binding;GO:0003676//nucleic acid binding;GO:0043167//ion binding;GO:0046914//transition metal ion binding;GO:0046872//metal ion binding;GO:0008270//zinc ion binding;
BGI_novel_G000728	0.345	1.305	1.93772	1.44558e-11	3.454e-11		GO:0097159//organic cyclic compound binding;GO:0046914//transition metal ion binding;GO:0043167//ion binding;GO:1901363//heterocyclic compound binding;GO:0005488//binding;GO:0043169//cation binding;GO:0046872//metal ion binding;GO:0003676//nucleic acid binding;GO:0008270//zinc ion binding;
BGI_novel_G000731	0	3.31	8.39999	9.08992e-35	1.21019e-34			K04733//interleukin-1 receptor-associated kinase 4 [EC:2.7.11.1]
BGI_novel_G000732	0.16	2.3	3.82165	6.52379e-52	6.6908e-52			K03549//KUP system potassium uptake protein;K03006//DNA-directed RNA polymerase II subunit RPB1 [EC:2.7.7.6]+ko03020//RNA polymerase
BGI_novel_G000734	0	0.775	4.68172	9.52041e-05	0.000327736
BGI_novel_G000743	0.72	5.3	2.88121	1.87105e-15	3.90136e-15		GO:0019438//aromatic compound biosynthetic process;GO:0006778//porphyrin-containing compound metabolic process;GO:0033013//tetrapyrrole metabolic process;GO:0006783//heme biosynthetic process;GO:0034641//cellular nitrogen compound metabolic process;GO:1901362//organic cyclic compound biosynthetic process;GO:0044249//cellular biosynthetic process;GO:1901360//organic cyclic compound metabolic proce…	K02259//cytochrome c oxidase assembly protein subunit 15+ko00860//Porphyrin and chlorophyll metabolism+ko01100//Metabolic pathways+ko00190//Oxidative phosphorylation+ko01110//Biosynthesis of secondary metabolites
BGI_novel_G000746	1.215	3.535	1.54445	6.72649e-14	1.47759e-13			K22706//(R)-mandelonitrile beta-glucosyltransferase [EC:2.4.1.354]+ko00460//Cyanoamino acid metabolism;K00699//glucuronosyltransferase [EC:2.4.1.17]+ko00860//Porphyrin and chlorophyll metabolism+ko00040//Pentose and glucuronate interconversions+ko01100//Metabolic pathways+ko00053//Ascorbate and aldarate metabolism+ko01110//Biosynthesis of secondary metabolites;K04628//ceramide galactosyltransfera…
BGI_novel_G000751	0.025	0.67	4.87864	1.57733e-08	4.307e-08			K13457//disease resistance protein RPM1+ko04626//Plant-pathogen interaction;K07393//glutathionyl-hydroquinone reductase [EC:1.8.5.7];K01183//chitinase [EC:3.2.1.14]+ko00520//Amino sugar and nucleotide sugar metabolism+ko01100//Metabolic pathways;K07200//5'-AMP-activated protein kinase, regulatory gamma subunit;K05387//glutamate receptor, ionotropic, plant
BGI_novel_G000760	0.23	2.105	3.19571	9.28482e-21	1.66715e-20		GO:0050794//regulation of cellular process;GO:0060255//regulation of macromolecule metabolic process;GO:0031326//regulation of cellular biosynthetic process;GO:2000112//regulation of cellular macromolecule biosynthetic process;GO:0051171//regulation of nitrogen compound metabolic process;GO:0019222//regulation of metabolic process;GO:0080090//regulation of primary metabolic process;GO:0009889//re…	K21437//ankyrin repeat domain-containing protein 13;K04733//interleukin-1 receptor-associated kinase 4 [EC:2.7.11.1];K11866//STAM-binding protein [EC:3.4.19.12]+ko04144//Endocytosis;K10398//kinesin family member 11;K03686//molecular chaperone DnaJ
BGI_novel_G000761	0	0.895	6.88857	4.42224e-15	9.34524e-15			K03686//molecular chaperone DnaJ;K07203//serine/threonine-protein kinase mTOR [EC:2.7.11.1]+ko04136//Autophagy - other;K04125//gibberellin 2beta-dioxygenase [EC:1.14.11.13]+ko00904//Diterpenoid biosynthesis+ko01110//Biosynthesis of secondary metabolites;K14301//nuclear pore complex protein Nup107+ko03013//RNA transport
BGI_novel_G000762	1.57	3.365	1.0965	0.000203153	0.000717845			K17964//leucine-rich PPR motif-containing protein, mitochondrial;K18328//lariat debranching enzyme [EC:3.1.-.-];K01230//mannosyl-oligosaccharide alpha-1,2-mannosidase [EC:3.2.1.113]+ko04141//Protein processing in endoplasmic reticulum+ko00510//N-Glycan biosynthesis+ko01100//Metabolic pathways;K05665//ATP-binding cassette, subfamily C (CFTR/MRP), member 1 [EC:7.6.2.3]+ko02010//ABC transporters;K05…
BGI_novel_G000765	0.065	2.81	5.39853	3.69624e-21	6.57245e-21
BGI_novel_G000769	0.08	2.41	4.87114	3.93181e-05	0.00013153			K04733//interleukin-1 receptor-associated kinase 4 [EC:2.7.11.1]
BGI_novel_G000771	0.07	3.945	5.75183	1.45492e-26	2.27382e-26			K04733//interleukin-1 receptor-associated kinase 4 [EC:2.7.11.1]
BGI_novel_G000772	0.2	3.245	4.03627	8.43675e-24	1.40555e-23		GO:0031224//intrinsic component of membrane;GO:0044425//membrane part;GO:0016021//integral component of membrane;GO:0016020//membrane;GO:0016301//kinase activity;GO:0030554//adenyl nucleotide binding;GO:0097159//organic cyclic compound binding;GO:0032553//ribonucleotide binding;GO:0001871//pattern binding;GO:0016772//transferase activity, transferring phosphorus-containing groups;GO:0005524//ATP …	K04733//interleukin-1 receptor-associated kinase 4 [EC:2.7.11.1]
BGI_novel_G000777	0.305	0.74	1.27774	0.000331699	0.0011937			K21737//acyl-lipid Delta6-acetylenase / acyl-lipid (9-3)-desaturase [EC:1.14.19.38 1.14.19.47]
BGI_novel_G000782	0.05	3.45	6.14115	4.84781e-18	9.35567e-18			K11649//SWI/SNF related-matrix-associated actin-dependent regulator of chromatin subfamily C;K02608//origin recognition complex subunit 6;K07304//peptide-methionine (S)-S-oxide reductase [EC:1.8.4.11]
BGI_novel_G000787	0.74	2.16	1.53733	8.61014e-05	0.000294887			K00284//glutamate synthase (ferredoxin) [EC:1.4.7.1]+ko00910//Nitrogen metabolism+ko00630//Glyoxylate and dicarboxylate metabolism;K07739//elongator complex protein 3 [EC:2.3.1.48];K18195//rhamnogalacturonan endolyase [EC:4.2.2.23]
BGI_novel_G000795	0.32	1.225	1.93421	4.35296e-08	1.21434e-07		GO:0034641//cellular nitrogen compound metabolic process;GO:0006807//nitrogen compound metabolic process;GO:0071704//organic substance metabolic process;GO:0043170//macromolecule metabolic process;GO:0006397//mRNA processing;GO:0006139//nucleobase-containing compound metabolic process;GO:0006725//cellular aromatic compound metabolic process;GO:0016070//RNA metabolic process;GO:0090304//nucleic ac…	K13176//THO complex subunit 7+ko03013//RNA transport
BGI_novel_G000802	1.41	10.04	2.82227	3.44158e-42	4.05346e-42		GO:0071704//organic substance metabolic process;GO:0019538//protein metabolic process;GO:0044267//cellular protein metabolic process;GO:0044271//cellular nitrogen compound biosynthetic process;GO:0044237//cellular metabolic process;GO:0044238//primary metabolic process;GO:0044260//cellular macromolecule metabolic process;GO:0034645//cellular macromolecule biosynthetic process;GO:0009987//cellular…	K02838//ribosome recycling factor
BGI_novel_G000804	0	3.69	6.51664	2.72488e-12	6.32958e-12		GO:0008168//methyltransferase activity;GO:0003824//catalytic activity;GO:0016740//transferase activity;GO:0016741//transferase activity, transferring one-carbon groups;	K15190//7SK snRNA methylphosphate capping enzyme [EC:2.1.1.-]
BGI_novel_G000806	0.84	2.215	1.3746	9.2057e-05	0.000316466			K03006//DNA-directed RNA polymerase II subunit RPB1 [EC:2.7.7.6]+ko03020//RNA polymerase;K02184//formin 2;K15174//RNA polymerase II-associated factor 1
BGI_novel_G000808	0	2.355	6.93445	1.81815e-15	3.78913e-15		GO:0016741//transferase activity, transferring one-carbon groups;GO:0008168//methyltransferase activity;GO:0003824//catalytic activity;GO:0016740//transferase activity;	K15190//7SK snRNA methylphosphate capping enzyme [EC:2.1.1.-]
BGI_novel_G000810	1.37	3.21	1.23671	6.4208e-06	2.02901e-05			K08770//ubiquitin C
BGI_novel_G000832	4.665	15.095	1.70186	6.26419e-17	1.24835e-16			K20718//LRR receptor-like serine/threonine-protein kinase ERECTA [EC:2.7.11.1]+ko04016//MAPK signaling pathway - plant
BGI_novel_G000835	0.07	4.9	6.10892	4.52831e-17	8.98402e-17		GO:1901576//organic substance biosynthetic process;GO:0006725//cellular aromatic compound metabolic process;GO:0032774//RNA biosynthetic process;GO:0009058//biosynthetic process;GO:1901362//organic cyclic compound biosynthetic process;GO:0051252//regulation of RNA metabolic process;GO:0050794//regulation of cellular process;GO:0044260//cellular macromolecule metabolic process;GO:0097659//nucleic …	K18730//PERQ amino acid-rich with GYF domain-containing protein
BGI_novel_G000836	2.535	13.7	2.43714	5.43766e-35	7.21038e-35
BGI_novel_G000837	0.88	2.535	1.52126	9.88363e-06	3.16604e-05			K01230//mannosyl-oligosaccharide alpha-1,2-mannosidase [EC:3.2.1.113]+ko04141//Protein processing in endoplasmic reticulum+ko00510//N-Glycan biosynthesis+ko01100//Metabolic pathways;K17964//leucine-rich PPR motif-containing protein, mitochondrial;K18328//lariat debranching enzyme [EC:3.1.-.-];K05658//ATP-binding cassette, subfamily B (MDR/TAP), member 1 [EC:7.6.2.2]+ko02010//ABC transporters;K143…
BGI_novel_G000851	1.295	5.065	1.96275	7.77991e-18	1.51242e-17			K07466//replication factor A1+ko03420//Nucleotide excision repair+ko03030//DNA replication+ko03440//Homologous recombination+ko03430//Mismatch repair;K00658//2-oxoglutarate dehydrogenase E2 component (dihydrolipoamide succinyltransferase) [EC:2.3.1.61]+ko00310//Lysine degradation+ko00020//Citrate cycle (TCA cycle)+ko01100//Metabolic pathways+ko01110//Biosynthesis of secondary metabolites+ko01200/…
BGI_novel_G000852	0.135	0.56	2.07139	0.000150674	0.000525756			K07466//replication factor A1+ko03420//Nucleotide excision repair+ko03030//DNA replication+ko03440//Homologous recombination+ko03430//Mismatch repair
BGI_novel_G000854	0.59	1.55	1.37933	0.000323355	0.0011624			K17499//protein phosphatase 1G [EC:3.1.3.16]
BGI_novel_G000861	4.02	23.14	2.52748	4.78888e-205	1.54764e-205
BGI_novel_G000865	2.64	13.84	2.39067	2.16612e-36	2.81238e-36			K01759//lactoylglutathione lyase [EC:4.4.1.5]+ko00620//Pyruvate metabolism
BGI_novel_G000866	0.22	0.57	1.37664	2.18509e-05	7.17151e-05			K22686//pro-apoptotic serine protease NMA111 [EC:3.4.21.-];K12447//UDP-sugar pyrophosphorylase [EC:2.7.7.64]+ko00520//Amino sugar and nucleotide sugar metabolism+ko00040//Pentose and glucuronate interconversions+ko01100//Metabolic pathways+ko00052//Galactose metabolism+ko00053//Ascorbate and aldarate metabolism;K17545//serine/threonine-protein kinase ULK4 [EC:2.7.11.1];K03515//DNA repair protein …
BGI_novel_G000889	0	0.22	4.33707	0.00047142	0.00171886			K10614//E3 ubiquitin-protein ligase HERC3 [EC:2.3.2.26]+ko04120//Ubiquitin mediated proteolysis
BGI_novel_G000895	0.26	1.175	2.17741	2.50818e-12	5.8151e-12		GO:0034645//cellular macromolecule biosynthetic process;GO:0034660//ncRNA metabolic process;GO:0009987//cellular process;GO:0071704//organic substance metabolic process;GO:0016070//RNA metabolic process;GO:0002128//tRNA nucleoside ribose methylation;GO:0006518//peptide metabolic process;GO:0030488//tRNA methylation;GO:0010467//gene expression;GO:0009058//biosynthetic process;GO:0044249//cellular …	K14864//tRNA (cytidine32/guanosine34-2'-O)-methyltransferase [EC:2.1.1.205]
BGI_novel_G000900	4.315	16.09	1.903	6.79515e-42	8.04584e-42			K12447//UDP-sugar pyrophosphorylase [EC:2.7.7.64]+ko00520//Amino sugar and nucleotide sugar metabolism+ko00040//Pentose and glucuronate interconversions+ko01100//Metabolic pathways+ko00052//Galactose metabolism+ko00053//Ascorbate and aldarate metabolism;K03006//DNA-directed RNA polymerase II subunit RPB1 [EC:2.7.7.6]+ko03020//RNA polymerase;K03517//quinolinate synthase [EC:2.5.1.72]+ko01100//Meta…
BGI_novel_G000901	0.03	3.565	6.9047	1.24675e-13	2.76155e-13			K20924//cellulose synthase-like protein [EC:2.4.1.-];K19893//glucan endo-1,3-beta-glucosidase 5/6 [EC:3.2.1.39]+ko00500//Starch and sucrose metabolism
BGI_novel_G000908	0.15	2.05	3.75973	6.67239e-10	1.71182e-09
BGI_novel_G000918	0.275	1.465	2.39828	1.6598e-07	4.76957e-07			K09122//uncharacterized protein
BGI_novel_G000920	0.39	2.33	2.57481	1.01407e-07	2.87915e-07
BGI_novel_G000923	0.145	16.435	6.82121	1.09985e-165	4.34767e-166			K20924//cellulose synthase-like protein [EC:2.4.1.-];K19893//glucan endo-1,3-beta-glucosidase 5/6 [EC:3.2.1.39]+ko00500//Starch and sucrose metabolism
BGI_novel_G000927	0	0.795	5.06485	1.02315e-05	3.28029e-05			K00819//ornithine--oxo-acid transaminase [EC:2.6.1.13]+ko00330//Arginine and proline metabolism+ko01100//Metabolic pathways+ko01110//Biosynthesis of secondary metabolites
BGI_novel_G000944	0.21	4.555	4.38216	6.98138e-11	1.71663e-10
BGI_novel_G000945	3.045	13.43	2.13581	1.30108e-41	1.5477e-41
BGI_novel_G000951	0.96	3.02	1.63733	0.000145438	0.000507064		GO:0006754//ATP biosynthetic process;GO:0006725//cellular aromatic compound metabolic process;GO:0009058//biosynthetic process;GO:0019693//ribose phosphate metabolic process;GO:0008152//metabolic process;GO:0090407//organophosphate biosynthetic process;GO:0034654//nucleobase-containing compound biosynthetic process;GO:0006807//nitrogen compound metabolic process;GO:0046483//heterocycle metabolic …	K02132//F-type H+-transporting ATPase subunit alpha+ko01100//Metabolic pathways+ko00190//Oxidative phosphorylation
BGI_novel_G000957	1.28	3.59	1.48452	3.85576e-06	1.20219e-05		GO:0046483//heterocycle metabolic process;GO:2001141//regulation of RNA biosynthetic process;GO:0050789//regulation of biological process;GO:0009889//regulation of biosynthetic process;GO:2000112//regulation of cellular macromolecule biosynthetic process;GO:0008152//metabolic process;GO:0080090//regulation of primary metabolic process;GO:0051716//cellular response to stimulus;GO:0044271//cellular…	K14486//auxin response factor+ko04075//Plant hormone signal transduction
BGI_novel_G000965	5.88	19.42	1.72711	5.20175e-54	5.20139e-54		GO:0036094//small molecule binding;GO:0097159//organic cyclic compound binding;GO:0035639//purine ribonucleoside triphosphate binding;GO:0000166//nucleotide binding;GO:0140096//catalytic activity, acting on a protein;GO:0004672//protein kinase activity;GO:0017076//purine nucleotide binding;GO:1901265//nucleoside phosphate binding;GO:0005524//ATP binding;GO:0043168//anion binding;GO:0043167//ion b…	K04733//interleukin-1 receptor-associated kinase 4 [EC:2.7.11.1]
BGI_novel_G000968	1.78	6.965	1.97349	1.20662e-24	1.97316e-24		GO:0016773//phosphotransferase activity, alcohol group as acceptor;GO:0030554//adenyl nucleotide binding;GO:0035639//purine ribonucleoside triphosphate binding;GO:1901265//nucleoside phosphate binding;GO:0000166//nucleotide binding;GO:0032555//purine ribonucleotide binding;GO:0016772//transferase activity, transferring phosphorus-containing groups;GO:0017076//purine nucleotide binding;GO:1901363/…	K04733//interleukin-1 receptor-associated kinase 4 [EC:2.7.11.1]
BGI_novel_G000969	0.04	1.385	5.05096	1.95701e-09	5.12244e-09
BGI_novel_G000970	0.53	3.95	2.90412	5.26022e-09	1.40491e-08
BGI_novel_G000980	0.135	1.71	3.63673	1.40157e-20	2.53053e-20
BGI_novel_G000981	0.555	2.33	2.06141	5.42583e-14	1.18765e-13
BGI_novel_G000998	19.62	42.555	1.11908	3.69086e-26	5.82183e-26
BGI_novel_G001003	0.105	6.935	6.01562	9.01387e-61	8.30117e-61		GO:0046483//heterocycle metabolic process;GO:0071704//organic substance metabolic process;GO:0006725//cellular aromatic compound metabolic process;GO:0006259//DNA metabolic process;GO:0015074//DNA integration;GO:0008152//metabolic process;GO:0009987//cellular process;GO:0006807//nitrogen compound metabolic process;GO:0044260//cellular macromolecule metabolic process;GO:0044238//primary metabolic …	K09338//homeobox-leucine zipper protein;K03686//molecular chaperone DnaJ;K12396//AP-3 complex subunit delta
BGI_novel_G001004	1.79	3.63	1.02014	0.000433015	0.00157394			K12616//enhancer of mRNA-decapping protein 4+ko03018//RNA degradation
BGI_novel_G001009	1.93	10.13	2.39793	2.32089e-11	5.59754e-11		GO:0036094//small molecule binding;GO:0043167//ion binding;GO:0017076//purine nucleotide binding;GO:0032555//purine ribonucleotide binding;GO:0043168//anion binding;GO:0008144//drug binding;GO:0032553//ribonucleotide binding;GO:1901363//heterocyclic compound binding;GO:0097367//carbohydrate derivative binding;GO:0032559//adenyl ribonucleotide binding;GO:0000166//nucleotide binding;GO:0097159//org…	K17681//ATPase family AAA domain-containing protein 3A/B
BGI_novel_G001010	0.23	1.325	2.53315	1.1224e-08	3.04145e-08		GO:0005488//binding;GO:0043167//ion binding;GO:0035639//purine ribonucleoside triphosphate binding;GO:0008144//drug binding;GO:0032559//adenyl ribonucleotide binding;GO:0005524//ATP binding;GO:0032555//purine ribonucleotide binding;GO:0036094//small molecule binding;GO:0097159//organic cyclic compound binding;GO:0017076//purine nucleotide binding;GO:0030554//adenyl nucleotide binding;GO:0032553//…	K17681//ATPase family AAA domain-containing protein 3A/B
BGI_novel_G001014	4.875	9.78	1.01336	0.000346518	0.00125038		GO:0006952//defense response;GO:0006950//response to stress;GO:0050896//response to stimulus;GO:0005488//binding;GO:0000166//nucleotide binding;GO:0043167//ion binding;GO:0032553//ribonucleotide binding;GO:1901265//nucleoside phosphate binding;GO:0017076//purine nucleotide binding;GO:0097159//organic cyclic compound binding;GO:0032559//adenyl ribonucleotide binding;GO:0097367//carbohydrate deriva…	K13457//disease resistance protein RPM1+ko04626//Plant-pathogen interaction;K07198//5'-AMP-activated protein kinase, catalytic alpha subunit [EC:2.7.11.11]
BGI_novel_G001016	21.56	43.84	1.02416	1.43129e-07	4.10263e-07
BGI_novel_G001023	0.035	42.105	10.2296	7.47233e-185	2.67633e-185		GO:0016020//membrane;GO:0016021//integral component of membrane;GO:0031224//intrinsic component of membrane;GO:0044425//membrane part;GO:0016772//transferase activity, transferring phosphorus-containing groups;GO:0016740//transferase activity;GO:0016301//kinase activity;GO:0003824//catalytic activity;	K13466//EIX receptor 1/2+ko04626//Plant-pathogen interaction
BGI_novel_G001040	1.04	7.755	2.89802	1.65925e-49	1.75699e-49		GO:0008152//metabolic process;GO:0016757//transferase activity, transferring glycosyl groups;GO:0016740//transferase activity;GO:0016758//transferase activity, transferring hexosyl groups;GO:0003824//catalytic activity;	K13692//UDP-glucose:(indol-3-yl)acetate beta-D-glucosyltransferase [EC:2.4.1.121]
BGI_novel_G001046	0.415	3.94	3.25153	1.30988e-10	3.26206e-10
BGI_novel_G001049	0.36	2.075	2.51313	3.02942e-10	7.65588e-10
BGI_novel_G001052	1.32	4.315	1.6915	9.19866e-15	1.96639e-14
BGI_novel_G001065	0.015	5.325	8.48478	9.10153e-71	7.52381e-71			K11593//eukaryotic translation initiation factor 2C;K22686//pro-apoptotic serine protease NMA111 [EC:3.4.21.-];K17545//serine/threonine-protein kinase ULK4 [EC:2.7.11.1];K03515//DNA repair protein REV1 [EC:2.7.7.-]
BGI_novel_G001068	0.25	2.125	3.04799	2.58161e-14	5.58692e-14		GO:0016021//integral component of membrane;GO:0044425//membrane part;GO:0031224//intrinsic component of membrane;GO:0016020//membrane;	K01193//beta-fructofuranosidase [EC:3.2.1.26]+ko01100//Metabolic pathways+ko00052//Galactose metabolism+ko00500//Starch and sucrose metabolism
BGI_novel_G001070	1.96	9.02	2.19322	1.88507e-26	2.95358e-26		GO:0006812//cation transport;GO:0006811//ion transport;GO:0006810//transport;GO:0030001//metal ion transport;GO:0051179//localization;GO:0051234//establishment of localization;GO:0046872//metal ion binding;GO:0043169//cation binding;GO:0005488//binding;GO:0043167//ion binding;
BGI_novel_G001089	2.375	5.2	1.13268	0.000251088	0.000894131		GO:0016020//membrane;GO:0044425//membrane part;GO:0031224//intrinsic component of membrane;GO:0016021//integral component of membrane;GO:0016772//transferase activity, transferring phosphorus-containing groups;GO:0035639//purine ribonucleoside triphosphate binding;GO:0016740//transferase activity;GO:0140096//catalytic activity, acting on a protein;GO:0016301//kinase activity;GO:0003824//catalytic…
BGI_novel_G001106	0.81	7.55	3.21663	1.10363e-162	4.45537e-163			K17398//DNA (cytosine-5)-methyltransferase 3A [EC:2.1.1.37]+ko01100//Metabolic pathways+ko00270//Cysteine and methionine metabolism;K01537//Ca2+-transporting ATPase [EC:3.6.3.8];K04733//interleukin-1 receptor-associated kinase 4 [EC:2.7.11.1];K11649//SWI/SNF related-matrix-associated actin-dependent regulator of chromatin subfamily C
BGI_novel_G001110	1.185	4.76	2.01724	0.00014731	0.000513747			K11866//STAM-binding protein [EC:3.4.19.12]+ko04144//Endocytosis;K10398//kinesin family member 11;K04733//interleukin-1 receptor-associated kinase 4 [EC:2.7.11.1];K21437//ankyrin repeat domain-containing protein 13;K20799//BRISC complex subunit Abro1
BGI_novel_G001113	0.01	0.105	3.00365	0.00016245	0.000568164			K03006//DNA-directed RNA polymerase II subunit RPB1 [EC:2.7.7.6]+ko03020//RNA polymerase;K03549//KUP system potassium uptake protein;K22686//pro-apoptotic serine protease NMA111 [EC:3.4.21.-];K17545//serine/threonine-protein kinase ULK4 [EC:2.7.11.1]
BGI_novel_G001116	1.24	3.51	1.52712	2.2198e-07	6.41912e-07			K14829//pre-rRNA-processing protein IPI3
BGI_novel_G001122	0.83	3.51	2.09676	6.70376e-09	1.79752e-08
BGI_novel_G001125	0.81	5.035	2.65815	8.98254e-16	1.85485e-15		GO:0016740//transferase activity;GO:0003824//catalytic activity;GO:0016741//transferase activity, transferring one-carbon groups;GO:0008168//methyltransferase activity;	K23151//methyltransferase-like protein 23 [EC:2.1.1.-];K21805//protein N-lysine methyltransferase METTL21C [EC:2.1.1.-]
BGI_novel_G001126	9.82	24.58	1.32877	6.01638e-31	8.62864e-31		GO:0008168//methyltransferase activity;GO:0016740//transferase activity;GO:0016741//transferase activity, transferring one-carbon groups;GO:0003824//catalytic activity;	K23151//methyltransferase-like protein 23 [EC:2.1.1.-];K21805//protein N-lysine methyltransferase METTL21C [EC:2.1.1.-]
BGI_novel_G001127	0	1.275	6.89248	4.10571e-15	8.66254e-15			K14288//exportin-T+ko03013//RNA transport;K10268//F-box and leucine-rich repeat protein 2/20
BGI_novel_G001128	0	2.51	7.40874	4.15599e-20	7.58874e-20			K14288//exportin-T+ko03013//RNA transport;K10268//F-box and leucine-rich repeat protein 2/20;K00430//peroxidase [EC:1.11.1.7]+ko01100//Metabolic pathways+ko01110//Biosynthesis of secondary metabolites+ko00940//Phenylpropanoid biosynthesis
BGI_novel_G001132	0.085	4.265	5.65135	9.77289e-48	1.06159e-47		GO:0016020//membrane;GO:0016021//integral component of membrane;GO:0044425//membrane part;GO:0031224//intrinsic component of membrane;GO:0030554//adenyl nucleotide binding;GO:0003824//catalytic activity;GO:0032559//adenyl ribonucleotide binding;GO:1901265//nucleoside phosphate binding;GO:0008144//drug binding;GO:0097367//carbohydrate derivative binding;GO:0043167//ion binding;GO:0017076//purine n…	K20359//PRA1 family protein 1;K20718//LRR receptor-like serine/threonine-protein kinase ERECTA [EC:2.7.11.1]+ko04016//MAPK signaling pathway - plant
BGI_novel_G001134	2.76	7.55	1.4449	1.39771e-12	3.21404e-12		GO:0044425//membrane part;GO:0031224//intrinsic component of membrane;GO:0016020//membrane;GO:0016021//integral component of membrane;GO:0016772//transferase activity, transferring phosphorus-containing groups;GO:0016301//kinase activity;GO:0016740//transferase activity;GO:0003824//catalytic activity;	K13466//EIX receptor 1/2+ko04626//Plant-pathogen interaction
BGI_novel_G001140	2.565	7.1	1.472	1.55719e-16	3.14057e-16
BGI_novel_G001141	0.21	2.44	3.52963	3.82022e-15	8.04969e-15
BGI_novel_G001142	0.82	1.895	1.21024	0.00055224	0.00202874
BGI_novel_G001146	2.3	23.54	3.36332	1.16004e-40	1.40121e-40
BGI_novel_G001149	0.88	2.505	1.5202	1.3859e-07	3.96959e-07		GO:0044260//cellular macromolecule metabolic process;GO:1901564//organonitrogen compound metabolic process;GO:0043603//cellular amide metabolic process;GO:0043043//peptide biosynthetic process;GO:0009987//cellular process;GO:0019538//protein metabolic process;GO:0044249//cellular biosynthetic process;GO:0044237//cellular metabolic process;GO:0006518//peptide metabolic process;GO:0044267//cellular…	K10773//endonuclease III [EC:4.2.99.18]+ko03410//Base excision repair;K02925//large subunit ribosomal protein L3e+ko03010//Ribosome
BGI_novel_G001153	0	7.945	8.81231	1.39448e-43	1.61045e-43			K00430//peroxidase [EC:1.11.1.7]+ko01100//Metabolic pathways+ko01110//Biosynthesis of secondary metabolites+ko00940//Phenylpropanoid biosynthesis
BGI_novel_G001154	9.315	78.95	3.07616	0	0
BGI_novel_G001159	0.28	20.075	6.11913	2.72832e-49	2.89738e-49		GO:0006812//cation transport;GO:0006810//transport;GO:0051179//localization;GO:0051234//establishment of localization;GO:0006811//ion transport;GO:0030001//metal ion transport;GO:0046872//metal ion binding;GO:0005488//binding;GO:0043167//ion binding;GO:0043169//cation binding;	K04733//interleukin-1 receptor-associated kinase 4 [EC:2.7.11.1];K10572//inositol-pentakisphosphate 2-kinase [EC:2.7.1.158]+ko01100//Metabolic pathways+ko04070//Phosphatidylinositol signaling system+ko00562//Inositol phosphate metabolism;K19307//25S rRNA (uracil2634-N3)-methyltransferase [EC:2.1.1.313]
BGI_novel_G001160	0	9.345	7.20277	6.10914e-18	1.1831e-17			K13466//EIX receptor 1/2+ko04626//Plant-pathogen interaction
BGI_novel_G001162	0.56	9.585	4.13238	4.24676e-20	7.75707e-20
BGI_novel_G001164	0.15	1.465	3.26669	5.25738e-07	1.55027e-06			K02350//DNA polymerase zeta [EC:2.7.7.7];K22686//pro-apoptotic serine protease NMA111 [EC:3.4.21.-];K03006//DNA-directed RNA polymerase II subunit RPB1 [EC:2.7.7.6]+ko03020//RNA polymerase;K19882//O-palmitoleoyl-L-serine hydrolase [EC:3.1.1.98];K00939//adenylate kinase [EC:2.7.4.3]+ko00230//Purine metabolism+ko01100//Metabolic pathways+ko01110//Biosynthesis of secondary metabolites+ko00730//Thiam…
BGI_novel_G001165	3.595	78.81	4.45835	0	0			K09286//EREBP-like factor
BGI_novel_G001168	4.375	11.105	1.34062	3.45983e-12	8.06585e-12		GO:0016020//membrane;GO:0016021//integral component of membrane;GO:0044425//membrane part;GO:0031224//intrinsic component of membrane;
BGI_novel_G001170	2.935	8.05	1.45712	0.000475048	0.00173296
BGI_novel_G001175	3.085	15.885	2.36702	3.54172e-16	7.21825e-16
BGI_novel_G001186	0	0.205	4.57055	0.000165977	0.000581487			K19984//exocyst complex component 5;K04733//interleukin-1 receptor-associated kinase 4 [EC:2.7.11.1];K10398//kinesin family member 11;K21437//ankyrin repeat domain-containing protein 13
BGI_novel_G001187	1.395	5.855	2.06948	2.96261e-35	3.91125e-35			K19984//exocyst complex component 5;K04733//interleukin-1 receptor-associated kinase 4 [EC:2.7.11.1];K10398//kinesin family member 11;K21437//ankyrin repeat domain-containing protein 13
BGI_novel_G001188	0	4.505	8.95791	3.49238e-47	3.82352e-47			K19984//exocyst complex component 5;K04733//interleukin-1 receptor-associated kinase 4 [EC:2.7.11.1];K10398//kinesin family member 11;K21437//ankyrin repeat domain-containing protein 13
BGI_novel_G001193	0	0.895	5.41869	7.75884e-07	2.31042e-06			K03686//molecular chaperone DnaJ;K02469//DNA gyrase subunit A [EC:5.99.1.3];K14050//geranylgeranyl transferase type-2 subunit alpha [EC:2.5.1.60]
BGI_novel_G001196	0.735	1.81	1.31809	0.000123613	0.00042878			K17086//transmembrane 9 superfamily member 2/4
BGI_novel_G001197	2.1	4.52	1.11078	9.2257e-09	2.48938e-08			K17086//transmembrane 9 superfamily member 2/4
BGI_novel_G001199	0	3.205	7.85165	1.07708e-25	1.71639e-25		GO:0043231//intracellular membrane-bounded organelle;GO:0005634//nucleus;GO:0044424//intracellular part;GO:0043229//intracellular organelle;GO:0005622//intracellular;GO:0005623//cell;GO:0043226//organelle;GO:0043227//membrane-bounded organelle;GO:0044464//cell part;
BGI_novel_G001210	0.145	4.51	4.96466	8.48108e-37	1.09324e-36
BGI_novel_G001221	0.89	3.84	2.10414	2.92817e-28	4.42371e-28
BGI_novel_G001225	0.97	2.95	1.60155	2.25891e-10	5.68208e-10		GO:0043170//macromolecule metabolic process;GO:0044260//cellular macromolecule metabolic process;GO:0044237//cellular metabolic process;GO:0044238//primary metabolic process;GO:0034641//cellular nitrogen compound metabolic process;GO:0046483//heterocycle metabolic process;GO:0090304//nucleic acid metabolic process;GO:0015074//DNA integration;GO:0071704//organic substance metabolic process;GO:0006…	K03283//heat shock 70kDa protein 1/2/6/8+ko03040//Spliceosome+ko04144//Endocytosis+ko04141//Protein processing in endoplasmic reticulum;K09571//FK506-binding protein 4/5 [EC:5.2.1.8];K04730//interleukin-1 receptor-associated kinase 1 [EC:2.7.11.1];K20279//synaptojanin [EC:3.1.3.36]+ko01100//Metabolic pathways+ko04070//Phosphatidylinositol signaling system+ko00562//Inositol phosphate metabolism
BGI_novel_G001226	0.055	3.29	5.95474	3.84373e-16	7.84373e-16		GO:0016788//hydrolase activity, acting on ester bonds;GO:0043167//ion binding;GO:0003824//catalytic activity;GO:0004722//protein serine/threonine phosphatase activity;GO:0004721//phosphoprotein phosphatase activity;GO:0043169//cation binding;GO:0016791//phosphatase activity;GO:0005488//binding;GO:0042578//phosphoric ester hydrolase activity;GO:0046872//metal ion binding;GO:0140096//catalytic acti…	K14497//protein phosphatase 2C [EC:3.1.3.16]+ko04016//MAPK signaling pathway - plant+ko04075//Plant hormone signal transduction
BGI_novel_G001231	0.09	1.87	4.38216	6.98138e-11	1.71663e-10
BGI_novel_G001237	0.045	3.505	6.24651	3.28207e-19	6.13038e-19			K18693//diacylglycerol diphosphate phosphatase / phosphatidate phosphatase [EC:3.1.3.81 3.1.3.4]+ko01110//Biosynthesis of secondary metabolites+ko00564//Glycerophospholipid metabolism+ko00561//Glycerolipid metabolism
BGI_novel_G001241	3.025	9.075	1.58815	1.25002e-10	3.10936e-10
BGI_novel_G001242	0.745	54.755	6.17598	6.42195e-79	4.86813e-79			K04733//interleukin-1 receptor-associated kinase 4 [EC:2.7.11.1]
BGI_novel_G001250	0.325	1.575	2.27069	2.18002e-05	7.15452e-05
BGI_novel_G001258	16.625	74.215	2.14428	8.97729e-114	5.048e-114		GO:0050896//response to stimulus;GO:0050794//regulation of cellular process;GO:0007165//signal transduction;GO:0023052//signaling;GO:0051716//cellular response to stimulus;GO:0006950//response to stress;GO:0006952//defense response;GO:0009987//cellular process;GO:0007154//cell communication;GO:0050789//regulation of biological process;GO:0065007//biological regulation;GO:0071944//cell periphery;G…	K13459//disease resistance protein RPS2+ko04626//Plant-pathogen interaction
BGI_novel_G001259	0.97	12.955	3.749	6.54337e-74	5.22413e-74		GO:0050794//regulation of cellular process;GO:0009987//cellular process;GO:0051716//cellular response to stimulus;GO:0007154//cell communication;GO:0065007//biological regulation;GO:0023052//signaling;GO:0007165//signal transduction;GO:0006952//defense response;GO:0006950//response to stress;GO:0050896//response to stimulus;GO:0050789//regulation of biological process;GO:0005623//cell;GO:0071944/…	K13459//disease resistance protein RPS2+ko04626//Plant-pathogen interaction
BGI_novel_G001260	6.915	28.45	2.02472	1.40708e-44	1.60286e-44		GO:0006952//defense response;GO:0007154//cell communication;GO:0007165//signal transduction;GO:0006950//response to stress;GO:0050794//regulation of cellular process;GO:0050896//response to stimulus;GO:0023052//signaling;GO:0065007//biological regulation;GO:0051716//cellular response to stimulus;GO:0009987//cellular process;GO:0050789//regulation of biological process;GO:0044464//cell part;GO:001…	K13459//disease resistance protein RPS2+ko04626//Plant-pathogen interaction
BGI_novel_G001271	48.28	167.75	1.79723	0	0			K05933//aminocyclopropanecarboxylate oxidase [EC:1.14.17.4]+ko01100//Metabolic pathways+ko01110//Biosynthesis of secondary metabolites+ko00270//Cysteine and methionine metabolism
BGI_novel_G001280	0.03	14.62	8.80421	4.83931e-64	4.3014e-64		GO:0044425//membrane part;GO:0031224//intrinsic component of membrane;GO:0016021//integral component of membrane;GO:0016020//membrane;GO:0016627//oxidoreductase activity, acting on the CH-CH group of donors;GO:0003824//catalytic activity;GO:0016491//oxidoreductase activity;GO:0016628//oxidoreductase activity, acting on the CH-CH group of donors, NAD or NADP as acceptor;	K00213//7-dehydrocholesterol reductase [EC:1.3.1.21]+ko01100//Metabolic pathways+ko01110//Biosynthesis of secondary metabolites+ko00100//Steroid biosynthesis
BGI_novel_G001285	1.06	3.59	1.76661	1.27097e-11	3.03059e-11
BGI_novel_G001294	0.6	1.305	1.12187	3.24641e-05	0.000107932			K13352//peroxin-11B+ko04146//Peroxisome
BGI_novel_G001297	0	1.44	6.68503	1.75976e-13	3.91885e-13		GO:0071705//nitrogen compound transport;GO:0046907//intracellular transport;GO:0015833//peptide transport;GO:0070727//cellular macromolecule localization;GO:0006810//transport;GO:0051234//establishment of localization;GO:0006886//intracellular protein transport;GO:0042886//amide transport;GO:0045184//establishment of protein localization;GO:0051641//cellular localization;GO:0071702//organic subst…	K12182//hepatocyte growth factor-regulated tyrosine kinase substrate+ko04144//Endocytosis+ko04145//Phagosome;K13141//integrator complex subunit 4;K13126//polyadenylate-binding protein+ko03015//mRNA surveillance pathway+ko03018//RNA degradation+ko03013//RNA transport
BGI_novel_G001299	2.895	15.015	2.37851	9.5003e-78	7.30038e-78		GO:0008152//metabolic process;GO:0003824//catalytic activity;	K18482//4-amino-4-deoxychorismate lyase [EC:4.1.3.38]+ko00790//Folate biosynthesis
BGI_novel_G001303	0.115	1.13	3.27827	2.69832e-08	7.44873e-08			K17086//transmembrane 9 superfamily member 2/4;K17604//zinc finger SWIM domain-containing protein 3
BGI_novel_G001304	3.265	13.54	2.05827	7.80605e-76	6.10581e-76			K03006//DNA-directed RNA polymerase II subunit RPB1 [EC:2.7.7.6]+ko03020//RNA polymerase;K12447//UDP-sugar pyrophosphorylase [EC:2.7.7.64]+ko00520//Amino sugar and nucleotide sugar metabolism+ko00040//Pentose and glucuronate interconversions+ko01100//Metabolic pathways+ko00052//Galactose metabolism+ko00053//Ascorbate and aldarate metabolism;K03517//quinolinate synthase [EC:2.5.1.72]+ko01100//Meta…
BGI_novel_G001305	0.22	1.75	2.97123	1.65139e-09	4.31137e-09
BGI_novel_G001311	0.185	1.55	3.07156	3.79822e-05	0.000126887		GO:0030001//metal ion transport;GO:0051234//establishment of localization;GO:0006812//cation transport;GO:0006810//transport;GO:0051179//localization;GO:0006811//ion transport;GO:0005488//binding;GO:0046872//metal ion binding;GO:0043169//cation binding;GO:0043167//ion binding;	K04733//interleukin-1 receptor-associated kinase 4 [EC:2.7.11.1]
BGI_novel_G001312	0.42	2.56	2.61349	5.62559e-06	1.77214e-05			K04733//interleukin-1 receptor-associated kinase 4 [EC:2.7.11.1]
BGI_novel_G001325	2.485	5.73	1.19726	2.23244e-12	5.16624e-12			K06890//uncharacterized protein
BGI_novel_G001326	0	0.445	4.90412	2.78129e-05	9.19836e-05			K03834//tyrosine-specific transport protein
BGI_novel_G001332	0.105	0.335	1.70002	0.000927147	0.00348095		GO:0000266//mitochondrial fission;GO:0007005//mitochondrion organization;GO:0009987//cellular process;GO:0007031//peroxisome organization;GO:0006996//organelle organization;GO:0048285//organelle fission;GO:0016559//peroxisome fission;GO:0016043//cellular component organization;GO:0071840//cellular component organization or biogenesis;GO:0098588//bounding membrane of organelle;GO:0044425//membrane…	K17969//mitochondrial fission 1 protein
BGI_novel_G001333	0.415	1.49	1.83309	2.41082e-06	7.42866e-06		GO:0048285//organelle fission;GO:0007005//mitochondrion organization;GO:0006996//organelle organization;GO:0016043//cellular component organization;GO:0000266//mitochondrial fission;GO:0071840//cellular component organization or biogenesis;GO:0009987//cellular process;GO:0016559//peroxisome fission;GO:0007031//peroxisome organization;GO:0005740//mitochondrial envelope;GO:0044446//intracellular or…	K17969//mitochondrial fission 1 protein
BGI_novel_G001337	0.535	1.89	1.82889	2.80943e-17	5.54076e-17			K00895//diphosphate-dependent phosphofructokinase [EC:2.7.1.90]+ko00010//Glycolysis / Gluconeogenesis+ko00030//Pentose phosphate pathway+ko01100//Metabolic pathways+ko00051//Fructose and mannose metabolism+ko01110//Biosynthesis of secondary metabolites
BGI_novel_G001348	0.675	2.08	1.62894	3.5944e-05	0.000119869		GO:0043226//organelle;GO:0044446//intracellular organelle part;GO:0005737//cytoplasm;GO:0009941//chloroplast envelope;GO:0009507//chloroplast;GO:0044424//intracellular part;GO:0043231//intracellular membrane-bounded organelle;GO:0044425//membrane part;GO:0031975//envelope;GO:0016021//integral component of membrane;GO:0043229//intracellular organelle;GO:0005622//intracellular;GO:0009536//plastid;G…	K16055//trehalose 6-phosphate synthase/phosphatase [EC:2.4.1.15 3.1.3.12]+ko01100//Metabolic pathways+ko00500//Starch and sucrose metabolism
BGI_novel_G001351	0.245	1.065	2.15467	7.59701e-05	0.000259318		GO:0006810//transport;GO:0006813//potassium ion transport;GO:0006811//ion transport;GO:0051234//establishment of localization;GO:0006812//cation transport;GO:0051179//localization;GO:0015672//monovalent inorganic cation transport;GO:0030001//metal ion transport;GO:0016021//integral component of membrane;GO:0016020//membrane;GO:0031224//intrinsic component of membrane;GO:0044425//membrane part;GO:…	K09008//NADH dehydrogenase [ubiquinone] 1 alpha subcomplex assembly factor 3
BGI_novel_G001352	1.36	3.44	1.34518	4.93145e-06	1.5482e-05
BGI_novel_G001355	4.47	9.685	1.11799	1.29763e-07	3.71114e-07
BGI_novel_G001356	1.21	5.055	2.0516	3.26417e-09	8.63518e-09
BGI_novel_G001360	0	3.3	5.16285	5.28656e-06	1.66276e-05		GO:0017076//purine nucleotide binding;GO:0003824//catalytic activity;GO:0003676//nucleic acid binding;GO:0000166//nucleotide binding;GO:0016818//hydrolase activity, acting on acid anhydrides, in phosphorus-containing anhydrides;GO:0016787//hydrolase activity;GO:0005524//ATP binding;GO:0005488//binding;GO:0008270//zinc ion binding;GO:0043167//ion binding;GO:0032553//ribonucleotide binding;GO:00971…
BGI_novel_G001361	0.12	1.715	3.82032	0.000103161	0.000355978			K01303//acylaminoacyl-peptidase [EC:3.4.19.1];K03070//preprotein translocase subunit SecA+ko03060//Protein export;K08176//MFS transporter, PHS family, inorganic phosphate transporter;K00799//glutathione S-transferase [EC:2.5.1.18]+ko00480//Glutathione metabolism
BGI_novel_G001362	0.67	3.395	2.33966	1.0726e-24	1.75269e-24		GO:0016020//membrane;GO:0016021//integral component of membrane;GO:0044425//membrane part;GO:0031224//intrinsic component of membrane;GO:0097159//organic cyclic compound binding;GO:0005524//ATP binding;GO:0004672//protein kinase activity;GO:0030554//adenyl nucleotide binding;GO:0000166//nucleotide binding;GO:0016772//transferase activity, transferring phosphorus-containing groups;GO:0016740//tran…	K04733//interleukin-1 receptor-associated kinase 4 [EC:2.7.11.1]
BGI_novel_G001363	0.18	1.48	3.04534	8.61332e-07	2.57315e-06		GO:0016020//membrane;GO:0044425//membrane part;GO:0016021//integral component of membrane;GO:0031224//intrinsic component of membrane;GO:0140096//catalytic activity, acting on a protein;GO:0043167//ion binding;GO:0016740//transferase activity;GO:0035639//purine ribonucleoside triphosphate binding;GO:1901363//heterocyclic compound binding;GO:0005488//binding;GO:0030554//adenyl nucleotide binding;G…	K04733//interleukin-1 receptor-associated kinase 4 [EC:2.7.11.1]
BGI_novel_G001365	1.16	3.51	1.5903	6.95764e-19	1.31085e-18
BGI_novel_G001374	1.76	3.715	1.08064	9.7333e-10	2.5151e-09		GO:2001141//regulation of RNA biosynthetic process;GO:0031323//regulation of cellular metabolic process;GO:1903506//regulation of nucleic acid-templated transcription;GO:0019222//regulation of metabolic process;GO:0031326//regulation of cellular biosynthetic process;GO:0060255//regulation of macromolecule metabolic process;GO:0080090//regulation of primary metabolic process;GO:0050789//regulation…	K04733//interleukin-1 receptor-associated kinase 4 [EC:2.7.11.1];K20923//mixed-linked glucan synthase [EC:2.4.1.-];K12396//AP-3 complex subunit delta
BGI_novel_G001378	3	10.78	1.85556	8.4499e-30	1.23563e-29		GO:0010467//gene expression;GO:0043170//macromolecule metabolic process;GO:0006397//mRNA processing;GO:0071704//organic substance metabolic process;GO:0006807//nitrogen compound metabolic process;GO:0008152//metabolic process;GO:0016070//RNA metabolic process;GO:0046483//heterocycle metabolic process;GO:0034641//cellular nitrogen compound metabolic process;GO:0000398//mRNA splicing, via spliceoso…	K12893//splicing factor, arginine/serine-rich 4/5/6+ko03040//Spliceosome
BGI_novel_G001389	5.345	12.49	1.23085	4.72257e-11	1.15473e-10		GO:0006629//lipid metabolic process;GO:0044283//small molecule biosynthetic process;GO:0044237//cellular metabolic process;GO:0009058//biosynthetic process;GO:1902652//secondary alcohol metabolic process;GO:0008204//ergosterol metabolic process;GO:1901360//organic cyclic compound metabolic process;GO:0008610//lipid biosynthetic process;GO:0008202//steroid metabolic process;GO:0071704//organic sub…	K00801//farnesyl-diphosphate farnesyltransferase [EC:2.5.1.21]+ko00909//Sesquiterpenoid and triterpenoid biosynthesis+ko01100//Metabolic pathways+ko01110//Biosynthesis of secondary metabolites+ko00100//Steroid biosynthesis
BGI_novel_G001392	0.485	2.25	2.2255	9.1143e-08	2.58258e-07		GO:0031224//intrinsic component of membrane;GO:0016020//membrane;GO:0044425//membrane part;GO:0016021//integral component of membrane;GO:0008194//UDP-glycosyltransferase activity;GO:0016758//transferase activity, transferring hexosyl groups;GO:0016740//transferase activity;GO:0008375//acetylglucosaminyltransferase activity;GO:0003824//catalytic activity;GO:0016757//transferase activity, transferr…	K09775//uncharacterized protein
BGI_novel_G001394	0.04	1.675	5.30621	5.70336e-11	1.39855e-10		GO:0046983//protein dimerization activity;GO:1901363//heterocyclic compound binding;GO:0003676//nucleic acid binding;GO:0005488//binding;GO:0005515//protein binding;GO:0097159//organic cyclic compound binding;GO:0003677//DNA binding;	K15200//general transcription factor 3C polypeptide 2;K08592//sentrin-specific protease 1 [EC:3.4.22.68];K17592//sacsin
BGI_novel_G001397	1.105	6.69	2.62728	8.10034e-10	2.08547e-09
BGI_novel_G001408	61.2	478.14	2.96241	0	0			K08770//ubiquitin C
BGI_novel_G001409	2.26	15.365	2.75584	2.29329e-175	8.58874e-176			K08770//ubiquitin C
BGI_novel_G001410	1.525	3.39	1.1477	6.0899e-09	1.63003e-08		GO:0033036//macromolecule localization;GO:0016043//cellular component organization;GO:0061024//membrane organization;GO:0072657//protein localization to membrane;GO:0010256//endomembrane system organization;GO:0051641//cellular localization;GO:0045048//protein insertion into ER membrane;GO:0051179//localization;GO:0033365//protein localization to organelle;GO:0051205//protein insertion into membr…	K22384//tail-anchored protein insertion receptor
BGI_novel_G001411	1.22	8.535	2.8103	2.28856e-46	2.53493e-46		GO:0070008//serine-type exopeptidase activity;GO:0008238//exopeptidase activity;GO:0017171//serine hydrolase activity;GO:0003824//catalytic activity;GO:0004180//carboxypeptidase activity;GO:0070011//peptidase activity, acting on L-amino acid peptides;GO:0008236//serine-type peptidase activity;GO:0004185//serine-type carboxypeptidase activity;GO:0008233//peptidase activity;GO:0016787//hydrolase ac…	K16296//serine carboxypeptidase-like clade I [EC:3.4.16.-]
BGI_novel_G001413	0.605	1.835	1.60142	3.44696e-10	8.73531e-10			K03424//TatD DNase family protein [EC:3.1.21.-]
BGI_novel_G001417	0.84	5.405	2.66668	7.80547e-15	1.66427e-14			K20556//cytochrome P450 family 76 subfamily C
BGI_novel_G001427	0.655	2.645	2.01882	1.58759e-14	3.41682e-14
BGI_novel_G001428	0.075	1.17	3.92451	3.77226e-11	9.17812e-11		GO:0016021//integral component of membrane;GO:0031224//intrinsic component of membrane;GO:0016020//membrane;GO:0044425//membrane part;
BGI_novel_G001438	0.185	2.315	3.64108	4.14573e-09	1.1018e-08
BGI_novel_G001440	0.535	1.755	1.73428	3.62269e-05	0.000120846			K12593//M-phase phosphoprotein 6, animal type+ko03018//RNA degradation
BGI_novel_G001443	0	1.415	5.27866	2.29543e-06	7.06328e-06
BGI_novel_G001444	0	1.08	4.66358	0.000104529	0.000360859
BGI_novel_G001455	0	1.12	5.00269	1.52479e-05	4.94613e-05			K07943//ADP-ribosylation factor-like protein 2
BGI_novel_G001456	0	6.055	7.43679	2.0121e-20	3.64546e-20			K07943//ADP-ribosylation factor-like protein 2
BGI_novel_G001463	0.74	5.68	2.96183	1.11062e-10	2.75633e-10		GO:0031224//intrinsic component of membrane;GO:0016020//membrane;GO:0016021//integral component of membrane;GO:0044425//membrane part;	K14376//poly(A) polymerase [EC:2.7.7.19]+ko03015//mRNA surveillance pathway
BGI_novel_G001471	0.06	17.73	8.17358	2.64317e-59	2.47416e-59		GO:0016020//membrane;GO:0016021//integral component of membrane;GO:0044425//membrane part;GO:0031224//intrinsic component of membrane;	K00558//DNA (cytosine-5)-methyltransferase 1 [EC:2.1.1.37]+ko01100//Metabolic pathways+ko00270//Cysteine and methionine metabolism
BGI_novel_G001480	0	0.575	5.27069	2.43532e-06	7.5064e-06		GO:0044425//membrane part;GO:0016021//integral component of membrane;GO:0016020//membrane;GO:0031224//intrinsic component of membrane;
BGI_novel_G001485	1.52	4.625	1.59652	8.58667e-26	1.36545e-25
BGI_novel_G001487	1.485	3.42	1.21726	8.02898e-06	2.55403e-05		GO:0046914//transition metal ion binding;GO:0043167//ion binding;GO:0003676//nucleic acid binding;GO:0008270//zinc ion binding;GO:0097159//organic cyclic compound binding;GO:0005488//binding;GO:0043169//cation binding;GO:1901363//heterocyclic compound binding;GO:0046872//metal ion binding;
BGI_novel_G001499	0	2.9	7.73585	4.22307e-24	6.9943e-24		GO:0008152//metabolic process;GO:0043227//membrane-bounded organelle;GO:0043229//intracellular organelle;GO:0044464//cell part;GO:0043226//organelle;GO:0005623//cell;GO:0044424//intracellular part;GO:0043231//intracellular membrane-bounded organelle;GO:0005622//intracellular;GO:0016740//transferase activity;GO:0016758//transferase activity, transferring hexosyl groups;GO:0016757//transferase acti…	K04628//ceramide galactosyltransferase [EC:2.4.1.47]+ko00600//Sphingolipid metabolism+ko01100//Metabolic pathways+ko00565//Ether lipid metabolism;K13692//UDP-glucose:(indol-3-yl)acetate beta-D-glucosyltransferase [EC:2.4.1.121]
BGI_novel_G001503	0	0.175	4.26669	0.000626598	0.00231387			K20924//cellulose synthase-like protein [EC:2.4.1.-];K18195//rhamnogalacturonan endolyase [EC:4.2.2.23];K13447//respiratory burst oxidase [EC:1.6.3.- 1.11.1.-]+ko04016//MAPK signaling pathway - plant+ko04626//Plant-pathogen interaction;K20299//vacuolar protein sorting-associated protein 53
BGI_novel_G001504	1.675	4.785	1.5118	4.54153e-06	1.42232e-05
BGI_novel_G001505	0.24	0.715	1.58219	3.06733e-05	0.000101823		GO:0035639//purine ribonucleoside triphosphate binding;GO:0097159//organic cyclic compound binding;GO:0008144//drug binding;GO:0043167//ion binding;GO:0032553//ribonucleotide binding;GO:0097367//carbohydrate derivative binding;GO:1901265//nucleoside phosphate binding;GO:1901363//heterocyclic compound binding;GO:0005488//binding;GO:0032559//adenyl ribonucleotide binding;GO:0000166//nucleotide bind…	K17545//serine/threonine-protein kinase ULK4 [EC:2.7.11.1];K15376//gephyrin [EC:2.10.1.1 2.7.7.75]+ko01100//Metabolic pathways+ko00790//Folate biosynthesis;K05349//beta-glucosidase [EC:3.2.1.21]+ko01100//Metabolic pathways+ko00500//Starch and sucrose metabolism+ko01110//Biosynthesis of secondary metabolites+ko00460//Cyanoamino acid metabolism+ko00940//Phenylpropanoid biosynthesis;K03453//bile aci…
BGI_novel_G001506	1.665	43.51	4.70538	0	0		GO:0031224//intrinsic component of membrane;GO:0016020//membrane;GO:0044425//membrane part;GO:0016021//integral component of membrane;	K12619//5'-3' exoribonuclease 2 [EC:3.1.13.-]+ko03018//RNA degradation+ko03008//Ribosome biogenesis in eukaryotes
BGI_novel_G001508	1.235	12.015	3.27491	8.94027e-136	4.29497e-136		GO:0009875//pollen-pistil interaction;GO:0022414//reproductive process;GO:0007154//cell communication;GO:0008037//cell recognition;GO:0051704//multi-organism process;GO:0009856//pollination;GO:0048544//recognition of pollen;GO:0032501//multicellular organismal process;GO:0000003//reproduction;GO:0044706//multi-multicellular organism process;GO:0009987//cellular process;GO:0031224//intrinsic compo…	K04733//interleukin-1 receptor-associated kinase 4 [EC:2.7.11.1]
BGI_novel_G001510	0.165	2.305	3.77593	8.37203e-28	1.27695e-27		GO:0006468//protein phosphorylation;GO:0048544//recognition of pollen;GO:0044267//cellular protein metabolic process;GO:0009987//cellular process;GO:0044238//primary metabolic process;GO:0036211//protein modification process;GO:0006464//cellular protein modification process;GO:0019538//protein metabolic process;GO:0022414//reproductive process;GO:1901564//organonitrogen compound metabolic process…	K04733//interleukin-1 receptor-associated kinase 4 [EC:2.7.11.1]
BGI_novel_G001511	0	0.43	5.67328	8.30797e-08	2.35042e-07		GO:0008152//metabolic process;GO:0000003//reproduction;GO:0036211//protein modification process;GO:0006796//phosphate-containing compound metabolic process;GO:0022414//reproductive process;GO:0009856//pollination;GO:0071704//organic substance metabolic process;GO:0044267//cellular protein metabolic process;GO:0006807//nitrogen compound metabolic process;GO:0019538//protein metabolic process;GO:19…	K04733//interleukin-1 receptor-associated kinase 4 [EC:2.7.11.1]
BGI_novel_G001518	6.525	31.685	2.27149	1.53635e-109	8.91838e-110		GO:0046872//metal ion binding;GO:0005488//binding;GO:0043167//ion binding;GO:0005509//calcium ion binding;GO:0043169//cation binding;	K02183//calmodulin+ko04016//MAPK signaling pathway - plant+ko04626//Plant-pathogen interaction+ko04070//Phosphatidylinositol signaling system
BGI_novel_G001519	6.635	65.68	3.29554	1.99019e-96	1.28758e-96		GO:0046872//metal ion binding;GO:0005488//binding;GO:0005509//calcium ion binding;GO:0043169//cation binding;GO:0043167//ion binding;	K02183//calmodulin+ko04016//MAPK signaling pathway - plant+ko04626//Plant-pathogen interaction+ko04070//Phosphatidylinositol signaling system
BGI_novel_G001520	2.825	12.2	2.09676	3.27832e-11	7.95377e-11
BGI_novel_G001524	0.03	1.92	5.90692	4.70741e-17	9.34511e-17			K15397//3-ketoacyl-CoA synthase [EC:2.3.1.199]+ko01100//Metabolic pathways+ko01110//Biosynthesis of secondary metabolites+ko00062//Fatty acid elongation;K22390//acid phosphatase type 7
BGI_novel_G001525	0.14	5.595	5.30914	5.74807e-20	1.05371e-19			K15397//3-ketoacyl-CoA synthase [EC:2.3.1.199]+ko01100//Metabolic pathways+ko01110//Biosynthesis of secondary metabolites+ko00062//Fatty acid elongation;K22390//acid phosphatase type 7
BGI_novel_G001526	3.725	40.775	3.45431	0	0		GO:0016020//membrane;GO:0044425//membrane part;GO:0031224//intrinsic component of membrane;GO:0016021//integral component of membrane;
BGI_novel_G001529	0.88	11.89	3.75268	3.42393e-213	1.06676e-213		GO:0016021//integral component of membrane;GO:0044425//membrane part;GO:0016020//membrane;GO:0031224//intrinsic component of membrane;	K20924//cellulose synthase-like protein [EC:2.4.1.-];K19893//glucan endo-1,3-beta-glucosidase 5/6 [EC:3.2.1.39]+ko00500//Starch and sucrose metabolism;K09291//nucleoprotein TPR+ko03013//RNA transport
BGI_novel_G001531	0.35	2.41	2.7972	0.000533519	0.00195686			K19042//E3 ubiquitin-protein ligase BOI and related proteins [EC:2.3.2.27]
BGI_novel_G001533	3.005	7.515	1.3272	1.53995e-30	2.22293e-30		GO:0038023//signaling receptor activity;GO:0009882//blue light photoreceptor activity;GO:0009881//photoreceptor activity;GO:0060089//molecular transducer activity;	K12118//cryptochrome 1+ko04712//Circadian rhythm - plant
BGI_novel_G001535	5.5	15.595	1.49935	8.19152e-52	8.41626e-52
BGI_novel_G001537	0	1.36	6.05096	1.51574e-09	3.95029e-09			K18121//glyoxylate/succinic semialdehyde reductase [EC:1.1.1.79 1.1.1.-]+ko01100//Metabolic pathways+ko00650//Butanoate metabolism+ko01200//Carbon metabolism+ko00630//Glyoxylate and dicarboxylate metabolism
BGI_novel_G001544	6.175	124.415	4.32113	0	0		GO:0016020//membrane;GO:0016021//integral component of membrane;GO:0044425//membrane part;GO:0031224//intrinsic component of membrane;GO:0016787//hydrolase activity;GO:0015075//ion transmembrane transporter activity;GO:0035639//purine ribonucleoside triphosphate binding;GO:0036094//small molecule binding;GO:0005215//transporter activity;GO:0008324//cation transmembrane transporter activity;GO:190…	K01537//Ca2+-transporting ATPase [EC:3.6.3.8]
BGI_novel_G001551	3.525	7.35	1.05895	0.000872078	0.00326527		GO:0000278//mitotic cell cycle;GO:0009987//cellular process;GO:0007049//cell cycle;GO:0000775//chromosome, centromeric region;GO:0005694//chromosome;GO:0044427//chromosomal part;GO:0043229//intracellular organelle;GO:0005623//cell;GO:0044446//intracellular organelle part;GO:0043228//non-membrane-bounded organelle;GO:0044424//intracellular part;GO:0043232//intracellular non-membrane-bounded organe…	K11548//kinetochore protein Nuf2
BGI_novel_G001553	0.7	11.24	4.00365	5.24785e-15	1.1118e-14
BGI_novel_G001555	0.605	2.87	2.23807	4.85552e-12	1.13827e-11		GO:0000166//nucleotide binding;GO:0071949//FAD binding;GO:0036094//small molecule binding;GO:1901363//heterocyclic compound binding;GO:1901265//nucleoside phosphate binding;GO:0005488//binding;GO:0050660//flavin adenine dinucleotide binding;GO:0043167//ion binding;GO:0043168//anion binding;GO:0050662//coenzyme binding;GO:0048037//cofactor binding;GO:0097159//organic cyclic compound binding;
BGI_novel_G001556	1.41	5.035	1.83409	1.89263e-08	5.18672e-08		GO:0050662//coenzyme binding;GO:1901363//heterocyclic compound binding;GO:0050660//flavin adenine dinucleotide binding;GO:0071949//FAD binding;GO:0048037//cofactor binding;GO:0043167//ion binding;GO:0000166//nucleotide binding;GO:0036094//small molecule binding;GO:0043168//anion binding;GO:1901265//nucleoside phosphate binding;GO:0005488//binding;GO:0097159//organic cyclic compound binding;
BGI_novel_G001566	0.53	2.25	2.06244	1.34043e-11	3.2005e-11
BGI_novel_G001570	0.525	1.835	1.83373	0.000784903	0.00292495
BGI_novel_G001571	1.145	6.395	2.45933	5.27391e-07	1.55555e-06
BGI_novel_G001578	1.105	3.495	1.65864	8.93615e-23	1.5233e-22			K02641//ferredoxin--NADP+ reductase [EC:1.18.1.2]+ko01100//Metabolic pathways+ko00195//Photosynthesis;K04733//interleukin-1 receptor-associated kinase 4 [EC:2.7.11.1];K22804//structural maintenance of chromosomes protein 6;K19026//spatacsin;K14857//AdoMet-dependent rRNA methyltransferase SPB1 [EC:2.1.1.-]
BGI_novel_G001579	0.775	1.56	1.00749	1.33659e-05	4.31787e-05			K20924//cellulose synthase-like protein [EC:2.4.1.-];K04733//interleukin-1 receptor-associated kinase 4 [EC:2.7.11.1];K18195//rhamnogalacturonan endolyase [EC:4.2.2.23];K12598//ATP-dependent RNA helicase DOB1 [EC:3.6.4.13]+ko03018//RNA degradation
BGI_novel_G001586	0.125	1.945	3.95474	3.16608e-08	8.7632e-08
BGI_novel_G001589	0.83	2.26	1.4504	4.07505e-05	0.000136509			K12396//AP-3 complex subunit delta;K19525//vacuolar protein sorting-associated protein 13A/C;K19347//SUN domain-containing protein 1/2;K09338//homeobox-leucine zipper protein
BGI_novel_G001592	0	1.235	6.41869	1.1907e-11	2.83645e-11			K01303//acylaminoacyl-peptidase [EC:3.4.19.1];K00799//glutathione S-transferase [EC:2.5.1.18]+ko00480//Glutathione metabolism;K08176//MFS transporter, PHS family, inorganic phosphate transporter;K03070//preprotein translocase subunit SecA+ko03060//Protein export
BGI_novel_G001599	119.87	378.955	1.65423	0	0			K15104//solute carrier family 25 (mitochondrial oxoglutarate transporter), member 11
BGI_novel_G001611	10.365	24.425	1.23858	2.68995e-37	3.43537e-37
BGI_novel_G001614	1.555	3.115	1.0127	7.1685e-06	2.27286e-05
BGI_novel_G001616	2.75	8.45	1.61864	9.86595e-22	1.72733e-21
BGI_novel_G001619	0.545	2.91	2.41869	6.60692e-11	1.62314e-10		GO:0003824//catalytic activity;GO:0008168//methyltransferase activity;GO:0016740//transferase activity;GO:0016741//transferase activity, transferring one-carbon groups;	K21805//protein N-lysine methyltransferase METTL21C [EC:2.1.1.-]
BGI_novel_G001635	0.46	1.89	2.03536	4.48984e-07	1.31942e-06			K12447//UDP-sugar pyrophosphorylase [EC:2.7.7.64]+ko00520//Amino sugar and nucleotide sugar metabolism+ko00040//Pentose and glucuronate interconversions+ko01100//Metabolic pathways+ko00052//Galactose metabolism+ko00053//Ascorbate and aldarate metabolism;K03260//translation initiation factor 4G+ko03013//RNA transport;K20777//exonuclease 3'-5' domain-containing protein 2 [EC:3.1.11.1];K05387//gluta…
BGI_novel_G001636	0.01	0.37	4.90412	1.17543e-08	3.18894e-08
BGI_novel_G001638	29.27	143.335	2.29036	0	0			K08770//ubiquitin C
BGI_novel_G001639	3.17	13.195	2.03651	4.01016e-56	3.90878e-56			K08770//ubiquitin C
BGI_novel_G001642	0.57	1.17	1.02544	4.11492e-05	0.000137894			K19984//exocyst complex component 5
BGI_novel_G001644	0	0.265	5.39175	9.62797e-07	2.88554e-06			K19984//exocyst complex component 5
BGI_novel_G001648	0.735	2.995	2.00811	1.79656e-06	5.48593e-06
BGI_novel_G001649	0.925	1.955	1.09074	0.000236326	0.000840012
BGI_novel_G001655	0	1.29	7.93243	7.21837e-27	1.12195e-26
BGI_novel_G001656	0.67	10.835	4.01831	2.40926e-92	1.61944e-92			K04079//molecular chaperone HtpG+ko04141//Protein processing in endoplasmic reticulum+ko04626//Plant-pathogen interaction;K17262//tubulin-specific chaperone B;K05665//ATP-binding cassette, subfamily C (CFTR/MRP), member 1 [EC:7.6.2.3]+ko02010//ABC transporters
BGI_novel_G001657	0.005	0.88	7.39619	4.24215e-17	8.40916e-17			K19525//vacuolar protein sorting-associated protein 13A/C;K12349//neutral ceramidase [EC:3.5.1.23]+ko00600//Sphingolipid metabolism+ko01100//Metabolic pathways;K04125//gibberellin 2beta-dioxygenase [EC:1.14.11.13]+ko00904//Diterpenoid biosynthesis+ko01110//Biosynthesis of secondary metabolites;K02469//DNA gyrase subunit A [EC:5.99.1.3]
BGI_novel_G001658	1.035	6.94	2.74852	1.40391e-96	9.06985e-97			K19525//vacuolar protein sorting-associated protein 13A/C;K12349//neutral ceramidase [EC:3.5.1.23]+ko00600//Sphingolipid metabolism+ko01100//Metabolic pathways;K04125//gibberellin 2beta-dioxygenase [EC:1.14.11.13]+ko00904//Diterpenoid biosynthesis+ko01110//Biosynthesis of secondary metabolites;K02469//DNA gyrase subunit A [EC:5.99.1.3]
BGI_novel_G001663	1.66	4.06	1.2947	1.71717e-06	5.2367e-06			K10908//DNA-directed RNA polymerase, mitochondrial [EC:2.7.7.6]
BGI_novel_G001665	0.04	1.205	4.92965	1.37395e-15	2.85162e-15		GO:0065007//biological regulation;GO:0006812//cation transport;GO:0030003//cellular cation homeostasis;GO:0055082//cellular chemical homeostasis;GO:0019725//cellular homeostasis;GO:0051179//localization;GO:0051234//establishment of localization;GO:0065008//regulation of biological quality;GO:0006811//ion transport;GO:0006873//cellular ion homeostasis;GO:0050801//ion homeostasis;GO:0042592//homeos…
BGI_novel_G001668	2.185	5.445	1.33389	3.12e-05	0.000103624
BGI_novel_G001670	0.445	1.635	1.89003	5.85202e-09	1.56538e-08			K00889//1-phosphatidylinositol-4-phosphate 5-kinase [EC:2.7.1.68]+ko04144//Endocytosis+ko01100//Metabolic pathways+ko04070//Phosphatidylinositol signaling system+ko00562//Inositol phosphate metabolism
BGI_novel_G001671	0.29	0.83	1.51346	0.000179176	0.000629837			K00889//1-phosphatidylinositol-4-phosphate 5-kinase [EC:2.7.1.68]+ko04144//Endocytosis+ko01100//Metabolic pathways+ko04070//Phosphatidylinositol signaling system+ko00562//Inositol phosphate metabolism
BGI_novel_G001685	0.425	1.13	1.41869	0.000134528	0.000468124
BGI_novel_G001689	55.43	123.51	1.14974	0	0			K04733//interleukin-1 receptor-associated kinase 4 [EC:2.7.11.1];K07936//GTP-binding nuclear protein Ran+ko03013//RNA transport+ko03008//Ribosome biogenesis in eukaryotes
BGI_novel_G001695	0.36	3.595	3.29574	2.95941e-26	4.65586e-26			K12837//splicing factor U2AF 65 kDa subunit+ko03040//Spliceosome
BGI_novel_G001696	0.52	8.065	3.95157	8.92304e-98	5.70877e-98			K12837//splicing factor U2AF 65 kDa subunit+ko03040//Spliceosome
BGI_novel_G001697	0	1.07	6.46867	5.67275e-12	1.33332e-11			K12837//splicing factor U2AF 65 kDa subunit+ko03040//Spliceosome
BGI_novel_G001698	0.06	6.665	6.82468	4.46618e-27	6.89876e-27		GO:0008152//metabolic process;GO:0003824//catalytic activity;	K01913//acetate---CoA ligase [EC:6.2.1.1]+ko00010//Glycolysis / Gluconeogenesis+ko01100//Metabolic pathways+ko01110//Biosynthesis of secondary metabolites+ko00620//Pyruvate metabolism+ko01200//Carbon metabolism+ko00630//Glyoxylate and dicarboxylate metabolism
BGI_novel_G001702	18.995	53.735	1.50171	2.04055e-94	1.34136e-94		GO:0044464//cell part;GO:0043227//membrane-bounded organelle;GO:0044444//cytoplasmic part;GO:0009579//thylakoid;GO:0005737//cytoplasm;GO:0043231//intracellular membrane-bounded organelle;GO:0009507//chloroplast;GO:0005623//cell;GO:0044424//intracellular part;GO:0044436//thylakoid part;GO:0043229//intracellular organelle;GO:0043226//organelle;GO:0009536//plastid;GO:0031977//thylakoid lumen;GO:0005…	K03768//peptidyl-prolyl cis-trans isomerase B (cyclophilin B) [EC:5.2.1.8]
BGI_novel_G001706	0	0.79	4.90412	2.78129e-05	9.19836e-05
BGI_novel_G001708	0.55	1.48	1.42032	4.33005e-06	1.35443e-05
BGI_novel_G001715	0.75	2.34	1.65029	0.000290648	0.00103963
BGI_novel_G001718	0	2.115	5.62032	1.35902e-07	3.89113e-07
BGI_novel_G001721	0.035	8.11	7.80931	3.38818e-140	1.58318e-140		GO:0016021//integral component of membrane;GO:0031224//intrinsic component of membrane;GO:0016020//membrane;GO:0044425//membrane part;GO:0005488//binding;GO:0004672//protein kinase activity;GO:0035639//purine ribonucleoside triphosphate binding;GO:0016740//transferase activity;GO:0016773//phosphotransferase activity, alcohol group as acceptor;GO:0017076//purine nucleotide binding;GO:0030554//aden…	K13420//LRR receptor-like serine/threonine-protein kinase FLS2 [EC:2.7.11.1]+ko04016//MAPK signaling pathway - plant+ko04626//Plant-pathogen interaction
BGI_novel_G001722	0.17	7.775	5.51455	6.64006e-54	6.65177e-54			K19613//leucine-rich repeat protein SHOC2
BGI_novel_G001729	0	2.01	4.55619	0.000177703	0.000624416
BGI_novel_G001737	0.85	30.075	5.14762	8.36781e-217	2.56361e-217			K20642//Rho GTPase-activating protein 22/24/25
BGI_novel_G001739	0.05	0.225	2.16715	0.000190485	0.000671163			K17545//serine/threonine-protein kinase ULK4 [EC:2.7.11.1];K01528//dynamin GTPase [EC:3.6.5.5]+ko04144//Endocytosis;K22686//pro-apoptotic serine protease NMA111 [EC:3.4.21.-]
BGI_novel_G001773	0.73	4.245	2.53681	4.76955e-46	5.31362e-46			K13352//peroxin-11B+ko04146//Peroxisome
BGI_novel_G001780	1.125	2.825	1.31915	5.12588e-07	1.51001e-06		GO:0005524//ATP binding;GO:0097367//carbohydrate derivative binding;GO:0043168//anion binding;GO:0017076//purine nucleotide binding;GO:0003824//catalytic activity;GO:0016818//hydrolase activity, acting on acid anhydrides, in phosphorus-containing anhydrides;GO:0032555//purine ribonucleotide binding;GO:0016462//pyrophosphatase activity;GO:0035639//purine ribonucleoside triphosphate binding;GO:0097…	K10908//DNA-directed RNA polymerase, mitochondrial [EC:2.7.7.6];K12614//ATP-dependent RNA helicase DDX6/DHH1 [EC:3.6.4.13]+ko03018//RNA degradation
BGI_novel_G001785	5.84	14.06	1.2673	4.76153e-19	8.93379e-19		GO:0006810//transport;GO:0051649//establishment of localization in cell;GO:0045184//establishment of protein localization;GO:0042886//amide transport;GO:0015833//peptide transport;GO:0015031//protein transport;GO:0051169//nuclear transport;GO:0071702//organic substance transport;GO:0008104//protein localization;GO:0071705//nitrogen compound transport;GO:0051234//establishment of localization;GO:0…	K07936//GTP-binding nuclear protein Ran+ko03013//RNA transport+ko03008//Ribosome biogenesis in eukaryotes
BGI_novel_G001787	7.235	17.045	1.23895	7.82717e-19	1.47718e-18		GO:0019825//oxygen binding;GO:0008144//drug binding;GO:0005488//binding;GO:0036094//small molecule binding;	K02349//DNA polymerase theta [EC:2.7.7.7]
BGI_novel_G001791	0.615	2.05	1.72125	1.57384e-08	4.29672e-08			K04079//molecular chaperone HtpG+ko04141//Protein processing in endoplasmic reticulum+ko04626//Plant-pathogen interaction;K05665//ATP-binding cassette, subfamily C (CFTR/MRP), member 1 [EC:7.6.2.3]+ko02010//ABC transporters
BGI_novel_G001792	0.185	0.64	1.81561	0.000541943	0.001989
BGI_novel_G001793	0.495	1.065	1.1096	0.000172621	0.000605792			K11279//nucleosome assembly protein 1-like 1;K05909//laccase [EC:1.10.3.2];K14297//nuclear pore complex protein Nup98-Nup96+ko03013//RNA transport
BGI_novel_G001795	0	4.115	7.18656	8.83122e-18	1.71916e-17			K04460//serine/threonine-protein phosphatase 5 [EC:3.1.3.16]
BGI_novel_G001804	0.85	1.715	1.02024	2.2187e-06	6.8204e-06			K03515//DNA repair protein REV1 [EC:2.7.7.-];K22686//pro-apoptotic serine protease NMA111 [EC:3.4.21.-];K11593//eukaryotic translation initiation factor 2C;K03517//quinolinate synthase [EC:2.5.1.72]+ko01100//Metabolic pathways+ko00760//Nicotinate and nicotinamide metabolism;K01147//exoribonuclease II [EC:3.1.13.1]
BGI_novel_G001815	4.62	10.61	1.20335	9.08804e-24	1.51531e-23			K10268//F-box and leucine-rich repeat protein 2/20;K03006//DNA-directed RNA polymerase II subunit RPB1 [EC:2.7.7.6]+ko03020//RNA polymerase;K17545//serine/threonine-protein kinase ULK4 [EC:2.7.11.1];K05909//laccase [EC:1.10.3.2];K22686//pro-apoptotic serine protease NMA111 [EC:3.4.21.-]
BGI_novel_G001816	0.345	1.57	2.19007	1.03657e-06	3.11678e-06			K03515//DNA repair protein REV1 [EC:2.7.7.-];K12447//UDP-sugar pyrophosphorylase [EC:2.7.7.64]+ko00520//Amino sugar and nucleotide sugar metabolism+ko00040//Pentose and glucuronate interconversions+ko01100//Metabolic pathways+ko00052//Galactose metabolism+ko00053//Ascorbate and aldarate metabolism;K20777//exonuclease 3'-5' domain-containing protein 2 [EC:3.1.11.1];K22920//UTP---glucose-1-phosphat…
BGI_novel_G001817	0.145	1.41	3.22997	3.61951e-05	0.000120729		GO:0051716//cellular response to stimulus;GO:0008152//metabolic process;GO:0044237//cellular metabolic process;GO:0071704//organic substance metabolic process;GO:0006974//cellular response to DNA damage stimulus;GO:0006259//DNA metabolic process;GO:0015074//DNA integration;GO:0050896//response to stimulus;GO:0033554//cellular response to stress;GO:0046483//heterocycle metabolic process;GO:0006725…	K03515//DNA repair protein REV1 [EC:2.7.7.-];K22686//pro-apoptotic serine protease NMA111 [EC:3.4.21.-];K07739//elongator complex protein 3 [EC:2.3.1.48];K03517//quinolinate synthase [EC:2.5.1.72]+ko01100//Metabolic pathways+ko00760//Nicotinate and nicotinamide metabolism;K07151//dolichyl-diphosphooligosaccharide---protein glycosyltransferase [EC:2.4.99.18]+ko04141//Protein processing in endoplas…
BGI_novel_G001820	1.375	2.975	1.11775	0.000143506	0.000500196		GO:0003723//RNA binding;GO:0097159//organic cyclic compound binding;GO:0003676//nucleic acid binding;GO:1901363//heterocyclic compound binding;GO:0003824//catalytic activity;GO:0005488//binding;GO:0016740//transferase activity;GO:0016741//transferase activity, transferring one-carbon groups;GO:0008168//methyltransferase activity;	K06442//23S rRNA (cytidine1920-2'-O)/16S rRNA (cytidine1409-2'-O)-methyltransferase [EC:2.1.1.226 2.1.1.227]
BGI_novel_G001823	0	0.72	4.97843	1.77448e-05	5.78211e-05			K00512//steroid 17alpha-monooxygenase / 17alpha-hydroxyprogesterone deacetylase [EC:1.14.14.19 1.14.14.32]+ko01100//Metabolic pathways
BGI_novel_G001824	0.435	2.25	2.39175	2.7386e-07	7.95872e-07			K00512//steroid 17alpha-monooxygenase / 17alpha-hydroxyprogesterone deacetylase [EC:1.14.14.19 1.14.14.32]+ko01100//Metabolic pathways
BGI_novel_G001831	0	4.89	7.41869	3.21766e-20	5.85816e-20			K19613//leucine-rich repeat protein SHOC2;K03131//transcription initiation factor TFIID subunit 6+ko03022//Basal transcription factors
BGI_novel_G001835	0.485	11.965	4.61246	2.24083e-129	1.13643e-129
BGI_novel_G001838	0.285	1.71	2.57827	1.50502e-22	2.57978e-22			K17964//leucine-rich PPR motif-containing protein, mitochondrial
BGI_novel_G001839	0	10.8	6.00365	2.63206e-09	6.93199e-09			K00213//7-dehydrocholesterol reductase [EC:1.3.1.21]+ko01100//Metabolic pathways+ko01110//Biosynthesis of secondary metabolites+ko00100//Steroid biosynthesis
BGI_novel_G001840	0.19	28.445	7.20028	9.15404e-137	4.37528e-137		GO:0016021//integral component of membrane;GO:0031224//intrinsic component of membrane;GO:0016020//membrane;GO:0044425//membrane part;GO:0016491//oxidoreductase activity;GO:0016627//oxidoreductase activity, acting on the CH-CH group of donors;GO:0016628//oxidoreductase activity, acting on the CH-CH group of donors, NAD or NADP as acceptor;GO:0003824//catalytic activity;	K00213//7-dehydrocholesterol reductase [EC:1.3.1.21]+ko01100//Metabolic pathways+ko01110//Biosynthesis of secondary metabolites+ko00100//Steroid biosynthesis
BGI_novel_G001843	1.21	2.57	1.09177	3.47232e-17	6.86244e-17		GO:0006629//lipid metabolic process;GO:0071704//organic substance metabolic process;GO:0044238//primary metabolic process;GO:0008152//metabolic process;GO:0016020//membrane;GO:0016021//integral component of membrane;GO:0044425//membrane part;GO:0031224//intrinsic component of membrane;GO:0008374//O-acyltransferase activity;GO:0003824//catalytic activity;GO:0016746//transferase activity, transferr…	K00679//phospholipid:diacylglycerol acyltransferase [EC:2.3.1.158]+ko01100//Metabolic pathways+ko00561//Glycerolipid metabolism
BGI_novel_G001844	0.97	3.915	2.00173	4.96915e-29	7.38487e-29		GO:0006629//lipid metabolic process;GO:0008152//metabolic process;GO:0071704//organic substance metabolic process;GO:0044238//primary metabolic process;GO:0016020//membrane;GO:0044425//membrane part;GO:0031224//intrinsic component of membrane;GO:0016021//integral component of membrane;GO:0016746//transferase activity, transferring acyl groups;GO:0003824//catalytic activity;GO:0016740//transferase…	K00679//phospholipid:diacylglycerol acyltransferase [EC:2.3.1.158]+ko01100//Metabolic pathways+ko00561//Glycerolipid metabolism
BGI_novel_G001848	0.98	4.7	2.25546	3.56657e-26	5.62089e-26			K02350//DNA polymerase zeta [EC:2.7.7.7];K21867//potassium channel;K03006//DNA-directed RNA polymerase II subunit RPB1 [EC:2.7.7.6]+ko03020//RNA polymerase;K04733//interleukin-1 receptor-associated kinase 4 [EC:2.7.11.1];K11593//eukaryotic translation initiation factor 2C
BGI_novel_G001877	1.51	9.405	2.63865	7.33242e-32	1.03133e-31			K19037//E3 ubiquitin-protein ligase ATL23 [EC:2.3.2.27]
BGI_novel_G001882	0.265	1.895	2.83227	9.55971e-13	2.18438e-12			K00512//steroid 17alpha-monooxygenase / 17alpha-hydroxyprogesterone deacetylase [EC:1.14.14.19 1.14.14.32]+ko01100//Metabolic pathways
BGI_novel_G001885	0.275	6.95	4.66009	3.87252e-79	2.92549e-79
BGI_novel_G001893	16.9	51.565	1.61339	5.03053e-155	2.13767e-155		GO:0008152//metabolic process;GO:0016740//transferase activity;GO:0003824//catalytic activity;GO:0016757//transferase activity, transferring glycosyl groups;GO:0016758//transferase activity, transferring hexosyl groups;	K18823//soyasaponin III rhamnosyltransferase [EC:2.4.1.273]
BGI_novel_G001904	1.39	14.855	3.40054	3.2007e-17	6.31928e-17			K04733//interleukin-1 receptor-associated kinase 4 [EC:2.7.11.1]
BGI_novel_G001905	0	7.54	6.55783	1.42757e-12	3.2838e-12		GO:0044706//multi-multicellular organism process;GO:0019538//protein metabolic process;GO:0009987//cellular process;GO:0006807//nitrogen compound metabolic process;GO:0071704//organic substance metabolic process;GO:0036211//protein modification process;GO:0016310//phosphorylation;GO:0032501//multicellular organismal process;GO:0043170//macromolecule metabolic process;GO:0008037//cell recognition;…	K04733//interleukin-1 receptor-associated kinase 4 [EC:2.7.11.1]
BGI_novel_G001910	0.77	10.17	3.7082	1.24047e-24	2.02927e-24		GO:0010033//response to organic substance;GO:0050896//response to stimulus;GO:0009733//response to auxin;GO:0009725//response to hormone;GO:0042221//response to chemical;GO:0009719//response to endogenous stimulus;	K14488//SAUR family protein+ko04075//Plant hormone signal transduction
BGI_novel_G001911	0	17.21	9.14666	2.78262e-52	2.84026e-52		GO:0005576//extracellular region;GO:0030145//manganese ion binding;GO:0046914//transition metal ion binding;GO:0045735//nutrient reservoir activity;GO:0043167//ion binding;GO:0046872//metal ion binding;GO:0005488//binding;GO:0043169//cation binding;	K00384//thioredoxin reductase (NADPH) [EC:1.8.1.9]+ko00450//Selenocompound metabolism
BGI_novel_G001913	0.09	3.05	5.05096	7.09302e-17	1.41515e-16		GO:0016788//hydrolase activity, acting on ester bonds;GO:0016787//hydrolase activity;GO:0003824//catalytic activity;	K10396//kinesin family member 5+ko04144//Endocytosis;K01206//alpha-L-fucosidase [EC:3.2.1.51]+ko00511//Other glycan degradation
BGI_novel_G001916	1.65	8.96	2.4331	8.67431e-49	9.27149e-49			K01054//acylglycerol lipase [EC:3.1.1.23]+ko01100//Metabolic pathways+ko00561//Glycerolipid metabolism
BGI_novel_G001918	0	0.61	4.51225	0.000218361	0.000773552			K01054//acylglycerol lipase [EC:3.1.1.23]+ko01100//Metabolic pathways+ko00561//Glycerolipid metabolism
BGI_novel_G001920	0	1.565	4.90412	2.78129e-05	9.19836e-05		GO:0003824//catalytic activity;GO:0016787//hydrolase activity;GO:0016788//hydrolase activity, acting on ester bonds;	K10396//kinesin family member 5+ko04144//Endocytosis
BGI_novel_G001925	3.145	12.14	1.95323	4.66952e-27	7.21641e-27		GO:0008283//cell proliferation;GO:0005576//extracellular region;GO:0005102//receptor binding;GO:0048018//receptor ligand activity;GO:0030545//receptor regulator activity;GO:0008083//growth factor activity;GO:0098772//molecular function regulator;GO:0005515//protein binding;GO:0005488//binding;
BGI_novel_G001934	0.13	7.99	5.9794	1.02881e-30	1.48179e-30
BGI_novel_G001948	0	2.065	5.74062	4.33772e-08	1.20996e-07			K01869//leucyl-tRNA synthetase [EC:6.1.1.4]+ko00970//Aminoacyl-tRNA biosynthesis
BGI_novel_G001954	4.21	9.145	1.12308	1.50249e-09	3.91391e-09
BGI_novel_G001956	29.88	59.805	1.00632	6.49e-23	1.10255e-22			K00416//ubiquinol-cytochrome c reductase subunit 6+ko01100//Metabolic pathways+ko00190//Oxidative phosphorylation
BGI_novel_G001969	0.59	2.255	1.94476	1.02305e-05	3.27982e-05		GO:0008152//metabolic process;GO:0016787//hydrolase activity;GO:0003824//catalytic activity;	K13258//2-hydroxyisoflavanone dehydratase [EC:4.2.1.105]+ko01110//Biosynthesis of secondary metabolites+ko00943//Isoflavonoid biosynthesis;K20506//tuliposide A-converting enzyme [EC:4.2.99.22]
BGI_novel_G001980	0.105	0.85	3.03536	5.15154e-10	1.31503e-09		GO:0008152//metabolic process;GO:0016757//transferase activity, transferring glycosyl groups;GO:0016740//transferase activity;GO:0003824//catalytic activity;GO:0016758//transferase activity, transferring hexosyl groups;	K08237//hydroquinone glucosyltransferase [EC:2.4.1.218]
BGI_novel_G001983	34.965	75.985	1.1239	2.75657e-46	3.05964e-46			K02942//large subunit ribosomal protein LP1+ko03010//Ribosome
BGI_novel_G001989	0.535	1.765	1.73419	0.000199859	0.000705321			K11323//histone arginine demethylase JMJD6 [EC:1.14.11.-]
BGI_novel_G001990	30.59	129.865	2.08641	0	0			K12885//heterogeneous nuclear ribonucleoprotein G+ko03040//Spliceosome;K12741//heterogeneous nuclear ribonucleoprotein A1/A3+ko03040//Spliceosome
BGI_novel_G001996	1.265	3.71	1.55619	2.57548e-05	8.49568e-05
BGI_novel_G002005	1.15	2.665	1.21009	2.45321e-10	6.18283e-10		GO:0046914//transition metal ion binding;GO:0043167//ion binding;GO:0008270//zinc ion binding;GO:0046872//metal ion binding;GO:0005488//binding;GO:0043169//cation binding;	K17604//zinc finger SWIM domain-containing protein 3
BGI_novel_G002011	37.53	208.805	2.47904	0	0		GO:0008152//metabolic process;GO:0003824//catalytic activity;
BGI_novel_G002019	8.68	281.045	5.01983	0	0		GO:0009719//response to endogenous stimulus;GO:0009725//response to hormone;GO:0050896//response to stimulus;GO:0010033//response to organic substance;GO:0009733//response to auxin;GO:0042221//response to chemical;	K14488//SAUR family protein+ko04075//Plant hormone signal transduction
BGI_novel_G002022	6.945	22.945	1.7243	2.22385e-103	1.35855e-103		GO:0097159//organic cyclic compound binding;GO:0003676//nucleic acid binding;GO:0005488//binding;GO:1901363//heterocyclic compound binding;	K13116//ATP-dependent RNA helicase DDX41 [EC:3.6.4.13];K01507//inorganic pyrophosphatase [EC:3.6.1.1]+ko00190//Oxidative phosphorylation;K05605//3-hydroxyisobutyryl-CoA hydrolase [EC:3.1.2.4]+ko00410//beta-Alanine metabolism+ko00280//Valine, leucine and isoleucine degradation+ko00640//Propanoate metabolism+ko01100//Metabolic pathways+ko01200//Carbon metabolism;K03062//26S proteasome regulatory su…
BGI_novel_G002023	3.08	7.755	1.32256	6.59134e-12	1.55375e-11		GO:0097159//organic cyclic compound binding;GO:0005488//binding;GO:1901363//heterocyclic compound binding;GO:0003676//nucleic acid binding;	K13116//ATP-dependent RNA helicase DDX41 [EC:3.6.4.13];K01507//inorganic pyrophosphatase [EC:3.6.1.1]+ko00190//Oxidative phosphorylation;K05605//3-hydroxyisobutyryl-CoA hydrolase [EC:3.1.2.4]+ko00410//beta-Alanine metabolism+ko00280//Valine, leucine and isoleucine degradation+ko00640//Propanoate metabolism+ko01100//Metabolic pathways+ko01200//Carbon metabolism;K03062//26S proteasome regulatory su…
BGI_novel_G002024	1.455	7.96	2.46355	7.83131e-27	1.21805e-26		GO:0005488//binding;GO:0097159//organic cyclic compound binding;GO:0003676//nucleic acid binding;GO:1901363//heterocyclic compound binding;	K13116//ATP-dependent RNA helicase DDX41 [EC:3.6.4.13];K01507//inorganic pyrophosphatase [EC:3.6.1.1]+ko00190//Oxidative phosphorylation;K05605//3-hydroxyisobutyryl-CoA hydrolase [EC:3.1.2.4]+ko00410//beta-Alanine metabolism+ko00280//Valine, leucine and isoleucine degradation+ko00640//Propanoate metabolism+ko01100//Metabolic pathways+ko01200//Carbon metabolism;K03062//26S proteasome regulatory su…
BGI_novel_G002029	0.095	0.46	2.29761	1.02505e-06	3.08089e-06			K22686//pro-apoptotic serine protease NMA111 [EC:3.4.21.-];K12447//UDP-sugar pyrophosphorylase [EC:2.7.7.64]+ko00520//Amino sugar and nucleotide sugar metabolism+ko00040//Pentose and glucuronate interconversions+ko01100//Metabolic pathways+ko00052//Galactose metabolism+ko00053//Ascorbate and aldarate metabolism;K03515//DNA repair protein REV1 [EC:2.7.7.-]
BGI_novel_G002030	15.735	72.445	2.20276	1.59198e-256	4.10131e-257		GO:0048037//cofactor binding;GO:0003824//catalytic activity;GO:0050662//coenzyme binding;GO:0005488//binding;	K09753//cinnamoyl-CoA reductase [EC:1.2.1.44]+ko01100//Metabolic pathways+ko01110//Biosynthesis of secondary metabolites+ko00940//Phenylpropanoid biosynthesis
BGI_novel_G002031	3.295	10.235	1.62957	5.72697e-53	5.80271e-53		GO:0005488//binding;GO:0003824//catalytic activity;GO:0050662//coenzyme binding;GO:0048037//cofactor binding;	K09753//cinnamoyl-CoA reductase [EC:1.2.1.44]+ko01100//Metabolic pathways+ko01110//Biosynthesis of secondary metabolites+ko00940//Phenylpropanoid biosynthesis
BGI_novel_G002035	0	14.955	9.5019	2.34767e-63	2.10536e-63			K02184//formin 2
BGI_novel_G002039	5.8	12.155	1.05494	1.13782e-07	3.24179e-07			K00799//glutathione S-transferase [EC:2.5.1.18]+ko00480//Glutathione metabolism;K03686//molecular chaperone DnaJ
BGI_novel_G002051	0	0.7	6.07907	1.08448e-09	2.80728e-09
BGI_novel_G002058	2.52	32.49	3.67702	1.2343e-122	6.54637e-123		GO:0031224//intrinsic component of membrane;GO:0044425//membrane part;GO:0016021//integral component of membrane;GO:0016020//membrane;	K14209//solute carrier family 36 (proton-coupled amino acid transporter)
BGI_novel_G002064	0.11	0.895	3.01022	0.000838124	0.00313288
BGI_novel_G002068	0.08	2.56	5.00726	3.77787e-42	4.453e-42			K12812//ATP-dependent RNA helicase UAP56/SUB2 [EC:3.6.4.13]+ko03040//Spliceosome+ko03015//mRNA surveillance pathway+ko03013//RNA transport
BGI_novel_G002070	0.46	1.88	2.02276	0.000534629	0.00196118
BGI_novel_G002071	4.47	18.99	2.11026	8.47806e-41	1.02199e-40			K10955//mucin-2
BGI_novel_G002072	0	0.61	4.54037	0.000191489	0.000674933			K10955//mucin-2
BGI_novel_G002078	0.67	6.36	3.25057	1.67419e-18	3.19235e-18
BGI_novel_G002083	30.37	72.1	1.24143	1.0988e-45	1.2322e-45		GO:0016020//membrane;GO:0016021//integral component of membrane;GO:0031224//intrinsic component of membrane;GO:0044425//membrane part;
BGI_novel_G002084	127.985	259.035	1.01693	6.32626e-224	1.87435e-224		GO:0016020//membrane;GO:0016021//integral component of membrane;GO:0031224//intrinsic component of membrane;GO:0044425//membrane part;	K21889//Bax inhibitor 1
BGI_novel_G002085	2.125	8.025	1.91698	2.39913e-11	5.78846e-11
BGI_novel_G002090	0.34	5.255	3.94476	1.20654e-63	1.07759e-63			K05747//Wiskott-Aldrich syndrome protein+ko04144//Endocytosis;K06640//serine/threonine-protein kinase ATR [EC:2.7.11.1]
BGI_novel_G002105	1.585	5.94	1.87637	2.98761e-12	6.94944e-12			K13433//pathogenesis-related genes transcriptional activator PTI5+ko04626//Plant-pathogen interaction;K14516//ethylene-responsive transcription factor 1+ko04016//MAPK signaling pathway - plant+ko04075//Plant hormone signal transduction
BGI_novel_G002108	0	1.84	4.6757	9.82203e-05	0.000338419
BGI_novel_G002109	0.47	5.45	3.50258	1.15523e-08	3.13219e-08
BGI_novel_G002112	0.015	0.205	3.54566	0.000434047	0.00157775			K03006//DNA-directed RNA polymerase II subunit RPB1 [EC:2.7.7.6]+ko03020//RNA polymerase;K04733//interleukin-1 receptor-associated kinase 4 [EC:2.7.11.1]
BGI_novel_G002120	0.61	1.375	1.15476	0.000996246	0.00375484		GO:0016021//integral component of membrane;GO:0016020//membrane;GO:0044425//membrane part;GO:0031224//intrinsic component of membrane;
BGI_novel_G002126	0	3.505	9.60055	8.25571e-67	7.12485e-67			K17604//zinc finger SWIM domain-containing protein 3
BGI_novel_G002130	1.35	4.105	1.61499	2.92299e-41	3.49716e-41			K17604//zinc finger SWIM domain-containing protein 3
BGI_novel_G002137	0	2.765	6.55619	1.46508e-12	3.37163e-12			K10727//chromatin licensing and DNA replication factor 1
BGI_novel_G002141	0	0.225	4.43018	0.00031654	0.00113659		GO:0097367//carbohydrate derivative binding;GO:0032555//purine ribonucleotide binding;GO:0016740//transferase activity;GO:0030554//adenyl nucleotide binding;GO:0043167//ion binding;GO:0043168//anion binding;GO:0035639//purine ribonucleoside triphosphate binding;GO:0036094//small molecule binding;GO:0016301//kinase activity;GO:0017076//purine nucleotide binding;GO:0008144//drug binding;GO:0004713/…	K13436//pto-interacting protein 1 [EC:2.7.11.1]+ko04626//Plant-pathogen interaction
BGI_novel_G002155	0.235	1.89	2.97123	1.02781e-05	3.29617e-05
BGI_novel_G002159	1.47	5.275	1.84379	7.09836e-05	0.000241939
BGI_novel_G002160	0.68	1.67	1.28941	0.000106607	0.000368114		GO:0043226//organelle;GO:0043231//intracellular membrane-bounded organelle;GO:1990234//transferase complex;GO:0005680//anaphase-promoting complex;GO:0000151//ubiquitin ligase complex;GO:0005634//nucleus;GO:0032991//macromolecular complex;GO:0005622//intracellular;GO:0044446//intracellular organelle part;GO:1902494//catalytic complex;GO:0044424//intracellular part;GO:0044422//organelle part;GO:000…	K03358//anaphase-promoting complex subunit 11+ko04120//Ubiquitin mediated proteolysis
BGI_novel_G002167	3.92	125.305	4.99121	0	0		GO:0003006//developmental process involved in reproduction;GO:0022414//reproductive process;GO:0032502//developmental process;GO:0000003//reproduction;GO:0016021//integral component of membrane;GO:0044464//cell part;GO:0071944//cell periphery;GO:0005623//cell;GO:0016020//membrane;GO:0031224//intrinsic component of membrane;GO:0044425//membrane part;GO:0005886//plasma membrane;
BGI_novel_G002174	0	2.065	4.90412	2.78129e-05	9.19836e-05
BGI_novel_G002184	0	2.225	5.88597	9.7379e-09	2.63087e-08
BGI_novel_G002189	1.925	4.705	1.29299	4.76129e-10	1.21352e-09			K14843//pescadillo
BGI_novel_G002195	0.405	1.955	2.26669	2.23801e-05	7.35099e-05
BGI_novel_G002197	0.8	3.405	2.09676	0.000320355	0.00115107		GO:0045454//cell redox homeostasis;GO:0050794//regulation of cellular process;GO:0019725//cellular homeostasis;GO:0050789//regulation of biological process;GO:0065008//regulation of biological quality;GO:0042592//homeostatic process;GO:0009987//cellular process;GO:0065007//biological regulation;GO:0005623//cell;GO:0016491//oxidoreductase activity;GO:0016684//oxidoreductase activity, acting on per…	K03386//peroxiredoxin (alkyl hydroperoxide reductase subunit C) [EC:1.11.1.15]
BGI_novel_G002204	1.31	4.895	1.91801	2.15665e-13	4.8195e-13
BGI_novel_G002205	0.22	1.52	2.7418	2.72462e-06	8.42475e-06
BGI_novel_G002208	0.25	2.85	3.55619	0.000412618	0.00149753
BGI_novel_G002213	4.295	9.715	1.17829	4.25202e-11	1.0372e-10
BGI_novel_G002215	0.755	2.495	1.73114	3.36041e-15	7.06798e-15		GO:0016021//integral component of membrane;GO:0044425//membrane part;GO:0016020//membrane;GO:0031224//intrinsic component of membrane;	K08246//cycloeucalenol cycloisomerase [EC:5.5.1.9]+ko01100//Metabolic pathways+ko01110//Biosynthesis of secondary metabolites+ko00100//Steroid biosynthesis
BGI_novel_G002217	13.68	30.745	1.16778	2.75943e-13	6.18595e-13		GO:0045184//establishment of protein localization;GO:0051649//establishment of localization in cell;GO:0046907//intracellular transport;GO:0008104//protein localization;GO:0006888//ER to Golgi vesicle-mediated transport;GO:0051179//localization;GO:0006810//transport;GO:0051128//regulation of cellular component organization;GO:0060627//regulation of vesicle-mediated transport;GO:0048193//Golgi ves…	K07877//Ras-related protein Rab-2A
BGI_novel_G002221	0.185	7.185	5.29937	2.43382e-53	2.4541e-53		GO:0017038//protein import;GO:0071702//organic substance transport;GO:0015031//protein transport;GO:0045184//establishment of protein localization;GO:0046907//intracellular transport;GO:0061024//membrane organization;GO:0071705//nitrogen compound transport;GO:0016043//cellular component organization;GO:0051641//cellular localization;GO:0051234//establishment of localization;GO:0007006//mitochondr…
BGI_novel_G002222	0.335	6.46	4.26331	3.71301e-43	4.31301e-43		GO:0015031//protein transport;GO:0072655//establishment of protein localization to mitochondrion;GO:0008104//protein localization;GO:0007005//mitochondrion organization;GO:0006605//protein targeting;GO:0051234//establishment of localization;GO:0090151//establishment of protein localization to mitochondrial membrane;GO:0006839//mitochondrial transport;GO:0033036//macromolecule localization;GO:0033…	K11816//indole-3-pyruvate monooxygenase [EC:1.14.13.168]+ko00380//Tryptophan metabolism+ko01100//Metabolic pathways
BGI_novel_G002235	0.99	31.265	4.97249	0	0			K01303//acylaminoacyl-peptidase [EC:3.4.19.1];K00799//glutathione S-transferase [EC:2.5.1.18]+ko00480//Glutathione metabolism;K08176//MFS transporter, PHS family, inorganic phosphate transporter;K03070//preprotein translocase subunit SecA+ko03060//Protein export
BGI_novel_G002240	0	10.775	8.22769	1.26775e-31	1.79243e-31			K05933//aminocyclopropanecarboxylate oxidase [EC:1.14.17.4]+ko01100//Metabolic pathways+ko01110//Biosynthesis of secondary metabolites+ko00270//Cysteine and methionine metabolism
BGI_novel_G002242	0.455	2.86	2.64272	5.24848e-10	1.34042e-09			K05933//aminocyclopropanecarboxylate oxidase [EC:1.14.17.4]+ko01100//Metabolic pathways+ko01110//Biosynthesis of secondary metabolites+ko00270//Cysteine and methionine metabolism
BGI_novel_G002243	0.245	5.235	4.40323	7.0112e-37	9.02694e-37			K05933//aminocyclopropanecarboxylate oxidase [EC:1.14.17.4]+ko01100//Metabolic pathways+ko01110//Biosynthesis of secondary metabolites+ko00270//Cysteine and methionine metabolism
BGI_novel_G002245	0.54	9.535	4.14084	3.39541e-231	9.74869e-232			K05350//beta-glucosidase [EC:3.2.1.21]+ko01100//Metabolic pathways+ko00500//Starch and sucrose metabolism+ko01110//Biosynthesis of secondary metabolites+ko00460//Cyanoamino acid metabolism+ko00940//Phenylpropanoid biosynthesis
BGI_novel_G002254	0.04	0.45	3.43646	5.58374e-09	1.49327e-08
BGI_novel_G002258	4.815	13.345	1.46318	2.23625e-28	3.36918e-28			K05658//ATP-binding cassette, subfamily B (MDR/TAP), member 1 [EC:7.6.2.2]+ko02010//ABC transporters;K05278//flavonol synthase [EC:1.14.20.6]+ko01100//Metabolic pathways+ko01110//Biosynthesis of secondary metabolites+ko00941//Flavonoid biosynthesis;K05277//anthocyanidin synthase [EC:1.14.20.4]+ko01100//Metabolic pathways+ko01110//Biosynthesis of secondary metabolites+ko00941//Flavonoid biosynthes…
BGI_novel_G002262	0.215	2.51	3.55619	5.50876e-13	1.24864e-12		GO:0044425//membrane part;GO:0031224//intrinsic component of membrane;GO:0016021//integral component of membrane;GO:0016020//membrane;
BGI_novel_G002263	0	2.195	6.05096	1.51574e-09	3.95029e-09			K05387//glutamate receptor, ionotropic, plant
BGI_novel_G002264	0.46	3.62	2.95825	4.73587e-21	8.43555e-21			K04079//molecular chaperone HtpG+ko04141//Protein processing in endoplasmic reticulum+ko04626//Plant-pathogen interaction;K08955//ATP-dependent metalloprotease [EC:3.4.24.-];K21596//calmodulin-binding transcription activator
BGI_novel_G002267	0.94	3.32	1.81665	2.59479e-07	7.5269e-07		GO:0000151//ubiquitin ligase complex;GO:0070013//intracellular organelle lumen;GO:0043229//intracellular organelle;GO:0005634//nucleus;GO:0044464//cell part;GO:0005730//nucleolus;GO:0043231//intracellular membrane-bounded organelle;GO:0031981//nuclear lumen;GO:0044428//nuclear part;GO:0044446//intracellular organelle part;GO:1902494//catalytic complex;GO:0080008//Cul4-RING E3 ubiquitin ligase com…	K14830//protein MAK11
BGI_novel_G002272	0	0.965	4.80163	5.00833e-05	0.000168767
BGI_novel_G002275	0.15	0.615	1.99716	5.95133e-07	1.76072e-06		GO:0031224//intrinsic component of membrane;GO:0016021//integral component of membrane;GO:0016020//membrane;GO:0044425//membrane part;GO:0016787//hydrolase activity;GO:0003824//catalytic activity;	K11592//endoribonuclease Dicer [EC:3.1.26.-]
BGI_novel_G002282	1.435	3.825	1.42235	0.000269331	0.000961152
BGI_novel_G002283	0.495	2.305	2.21224	8.93476e-07	2.67232e-06
BGI_novel_G002303	0.06	0.795	3.7497	0.000209117	0.000739656			K00430//peroxidase [EC:1.11.1.7]+ko01100//Metabolic pathways+ko01110//Biosynthesis of secondary metabolites+ko00940//Phenylpropanoid biosynthesis;K14318//nuclear pore complex protein Nup88+ko03013//RNA transport;K02218//casein kinase 1 [EC:2.7.11.1]
BGI_novel_G002305	0.62	3.43	2.47258	1.52794e-12	3.51818e-12			K02218//casein kinase 1 [EC:2.7.11.1];K14318//nuclear pore complex protein Nup88+ko03013//RNA transport;K00430//peroxidase [EC:1.11.1.7]+ko01100//Metabolic pathways+ko01110//Biosynthesis of secondary metabolites+ko00940//Phenylpropanoid biosynthesis;K05291//phosphatidylinositol glycan, class S+ko01100//Metabolic pathways+ko00563//Glycosylphosphatidylinositol (GPI)-anchor biosynthesis
BGI_novel_G002306	1.77	15.055	3.09756	8.50168e-15	1.81441e-14			K15503//serine/threonine-protein phosphatase 6 regulatory ankyrin repeat subunit B
BGI_novel_G002309	0	4.08	8.84542	2.23309e-44	2.55164e-44		GO:0008144//drug binding;GO:0035639//purine ribonucleoside triphosphate binding;GO:0005488//binding;GO:0043168//anion binding;GO:0016772//transferase activity, transferring phosphorus-containing groups;GO:0003824//catalytic activity;GO:0140096//catalytic activity, acting on a protein;GO:0016301//kinase activity;GO:0032553//ribonucleotide binding;GO:0017076//purine nucleotide binding;GO:0043167//i…	K08790//serine/threonine kinase 38 [EC:2.7.11.1]
BGI_novel_G002313	0.325	0.755	1.2495	0.000473281	0.00172601		GO:0016020//membrane;GO:0031224//intrinsic component of membrane;GO:0044425//membrane part;GO:0016021//integral component of membrane;	K20362//protein transport protein YIF1
BGI_novel_G002317	0.735	2.625	1.85407	0.0001042	0.000359645
BGI_novel_G002321	0.805	9.46	3.55955	1.30326e-87	9.17239e-88			K15718//linoleate 9S-lipoxygenase [EC:1.13.11.58]+ko00591//Linoleic acid metabolism;K16292//KDEL-tailed cysteine endopeptidase [EC:3.4.22.-]
BGI_novel_G002324	0	2	6.03552	1.81793e-09	4.75423e-09		GO:0017111//nucleoside-triphosphatase activity;GO:0004386//helicase activity;GO:0016818//hydrolase activity, acting on acid anhydrides, in phosphorus-containing anhydrides;GO:0016787//hydrolase activity;GO:0016817//hydrolase activity, acting on acid anhydrides;GO:0003824//catalytic activity;GO:0016462//pyrophosphatase activity;	K15196//transcription factor IIIB 90 kDa subunit
BGI_novel_G002333	0.835	3.515	2.06585	1.18959e-11	2.83289e-11
BGI_novel_G002352	0.065	1.16	4.18422	9.70793e-06	3.10769e-05		GO:0006810//transport;GO:0006811//ion transport;GO:0051179//localization;GO:0051234//establishment of localization;GO:0030001//metal ion transport;GO:0006812//cation transport;GO:0046872//metal ion binding;GO:0043167//ion binding;GO:0005488//binding;GO:0043169//cation binding;	K04733//interleukin-1 receptor-associated kinase 4 [EC:2.7.11.1];K10572//inositol-pentakisphosphate 2-kinase [EC:2.7.1.158]+ko01100//Metabolic pathways+ko04070//Phosphatidylinositol signaling system+ko00562//Inositol phosphate metabolism
BGI_novel_G002360	4.755	22.1	2.22302	7.64181e-61	7.03175e-61		GO:0008152//metabolic process;GO:0055114//oxidation-reduction process;GO:0031224//intrinsic component of membrane;GO:0016021//integral component of membrane;GO:0044425//membrane part;GO:0016020//membrane;	K08360//cytochrome b-561 [EC:7.2.1.3]
BGI_novel_G002363	10.58	35.155	1.73142	5.03958e-91	3.4329e-91			K03327//multidrug resistance protein, MATE family
BGI_novel_G002367	0.575	5.055	3.09676	1.14998e-07	3.27785e-07
BGI_novel_G002370	0	1.64	5.34469	1.392e-06	4.2189e-06			K16282//E3 ubiquitin-protein ligase RHA2 [EC:2.3.2.27]
BGI_novel_G002376	0.06	0.79	3.68172	0.000220295	0.000780742
BGI_novel_G002383	0.16	0.78	2.30621	9.13643e-07	2.7346e-06		GO:0044425//membrane part;GO:0031224//intrinsic component of membrane;GO:0016021//integral component of membrane;GO:0016020//membrane;GO:0030554//adenyl nucleotide binding;GO:1901363//heterocyclic compound binding;GO:0043168//anion binding;GO:0032553//ribonucleotide binding;GO:0097367//carbohydrate derivative binding;GO:0035639//purine ribonucleoside triphosphate binding;GO:0004672//protein kinas…	K04733//interleukin-1 receptor-associated kinase 4 [EC:2.7.11.1]
BGI_novel_G002385	0.275	10.015	5.14115	6.7128e-18	1.30195e-17		GO:0016740//transferase activity;GO:0004721//phosphoprotein phosphatase activity;GO:0003824//catalytic activity;GO:0008138//protein tyrosine/serine/threonine phosphatase activity;GO:0140096//catalytic activity, acting on a protein;GO:0042578//phosphoric ester hydrolase activity;GO:0005515//protein binding;GO:0051015//actin filament binding;GO:0016791//phosphatase activity;GO:0004725//protein tyro…	K04459//dual specificity MAP kinase phosphatase [EC:3.1.3.16 3.1.3.48];K10999//cellulose synthase A [EC:2.4.1.12];K22374//3''-deamino-3''-oxonicotianamine reductase [EC:1.1.1.285]
BGI_novel_G002389	2.745	5.705	1.07172	0.000118608	0.000410786			K01179//endoglucanase [EC:3.2.1.4]+ko01100//Metabolic pathways+ko00500//Starch and sucrose metabolism
BGI_novel_G002392	1.68	3.915	1.23151	2.11514e-09	5.54476e-09			K07466//replication factor A1+ko03420//Nucleotide excision repair+ko03030//DNA replication+ko03440//Homologous recombination+ko03430//Mismatch repair
BGI_novel_G002396	1.5	4.145	1.46904	0.000343255	0.00123808		GO:0010468//regulation of gene expression;GO:0060255//regulation of macromolecule metabolic process;GO:0019222//regulation of metabolic process;GO:0065007//biological regulation;GO:0050789//regulation of biological process;GO:0005623//cell;GO:0016020//membrane;GO:0071944//cell periphery;GO:0005634//nucleus;GO:0043231//intracellular membrane-bounded organelle;GO:0005773//vacuole;GO:0005622//intrac…	K04371//mitogen-activated protein kinase 1/3 [EC:2.7.11.24]+ko04933//AGE-RAGE signaling pathway in diabetic complications
BGI_novel_G002400	1.675	3.835	1.19159	8.83679e-07	2.64113e-06			K12812//ATP-dependent RNA helicase UAP56/SUB2 [EC:3.6.4.13]+ko03040//Spliceosome+ko03015//mRNA surveillance pathway+ko03013//RNA transport
BGI_novel_G002409	0	3.43	7.20549	5.74061e-18	1.11085e-17		GO:0005623//cell;GO:0005737//cytoplasm;GO:0016020//membrane;GO:0044424//intracellular part;GO:0005622//intracellular;GO:0044464//cell part;GO:0008238//exopeptidase activity;GO:0003824//catalytic activity;GO:0017171//serine hydrolase activity;GO:0004252//serine-type endopeptidase activity;GO:0070008//serine-type exopeptidase activity;GO:0016787//hydrolase activity;GO:0140096//catalytic activity, a…
BGI_novel_G002411	2.015	6.69	1.72176	3.81024e-13	8.58002e-13
BGI_novel_G002412	0.34	1.205	1.81722	8.27368e-10	2.13123e-09			K03942//NADH dehydrogenase (ubiquinone) flavoprotein 1 [EC:7.1.1.2 1.6.99.3]+ko01100//Metabolic pathways+ko00190//Oxidative phosphorylation
BGI_novel_G002428	1.56	4.66	1.57381	5.19346e-18	1.00354e-17			K15400//omega-hydroxypalmitate O-feruloyl transferase [EC:2.3.1.188]+ko00073//Cutin, suberine and wax biosynthesis;K12393//AP-1 complex subunit mu;K04733//interleukin-1 receptor-associated kinase 4 [EC:2.7.11.1]
BGI_novel_G002429	0.88	3.15	1.83373	8.51486e-07	2.54231e-06			K01191//alpha-mannosidase [EC:3.2.1.24]+ko00511//Other glycan degradation;K12447//UDP-sugar pyrophosphorylase [EC:2.7.7.64]+ko00520//Amino sugar and nucleotide sugar metabolism+ko00040//Pentose and glucuronate interconversions+ko01100//Metabolic pathways+ko00052//Galactose metabolism+ko00053//Ascorbate and aldarate metabolism;K03517//quinolinate synthase [EC:2.5.1.72]+ko01100//Metabolic pathways+…
BGI_novel_G002430	2.415	6.29	1.38995	3.32347e-08	9.20999e-08			K14288//exportin-T+ko03013//RNA transport;K10268//F-box and leucine-rich repeat protein 2/20;K00430//peroxidase [EC:1.11.1.7]+ko01100//Metabolic pathways+ko01110//Biosynthesis of secondary metabolites+ko00940//Phenylpropanoid biosynthesis;K06228//fused [EC:2.7.11.1];K05909//laccase [EC:1.10.3.2]
BGI_novel_G002431	3.045	16.16	2.4071	1.02298e-35	1.34241e-35			K20855//beta-1,3-galactosyltransferase 1/2/3/4/5/7/8 [EC:2.4.1.-]
BGI_novel_G002437	0.115	0.35	1.59855	0.000892114	0.00334323			K04733//interleukin-1 receptor-associated kinase 4 [EC:2.7.11.1]
BGI_novel_G002439	0.16	0.755	2.26736	4.63579e-06	1.45255e-05		GO:0003723//RNA binding;GO:0005488//binding;GO:0003725//double-stranded RNA binding;GO:1901363//heterocyclic compound binding;GO:0097159//organic cyclic compound binding;GO:0003676//nucleic acid binding;	K04733//interleukin-1 receptor-associated kinase 4 [EC:2.7.11.1]
BGI_novel_G002440	0	0.95	6.70291	1.29505e-13	2.87052e-13		GO:0097159//organic cyclic compound binding;GO:1901363//heterocyclic compound binding;GO:0005488//binding;GO:0003725//double-stranded RNA binding;GO:0003676//nucleic acid binding;GO:0003723//RNA binding;	K04733//interleukin-1 receptor-associated kinase 4 [EC:2.7.11.1]
BGI_novel_G002444	0.04	0.86	4.48908	8.24845e-07	2.46092e-06			K10955//mucin-2
BGI_novel_G002446	0.255	1.705	2.71789	1.77846e-14	3.83386e-14		GO:0006401//RNA catabolic process;GO:0006139//nucleobase-containing compound metabolic process;GO:0044248//cellular catabolic process;GO:0044237//cellular metabolic process;GO:0006974//cellular response to DNA damage stimulus;GO:0009987//cellular process;GO:1901360//organic cyclic compound metabolic process;GO:0009059//macromolecule biosynthetic process;GO:0006284//base-excision repair;GO:0044238…	K04799//flap endonuclease-1 [EC:3.-.-.-]+ko03030//DNA replication+ko03410//Base excision repair+ko03450//Non-homologous end-joining
BGI_novel_G002455	8.35	39.57	2.22373	1.09944e-41	1.30701e-41
BGI_novel_G002458	0.525	2.45	2.22817	1.29199e-18	2.45449e-18			K14491//two-component response regulator ARR-B family+ko04075//Plant hormone signal transduction
BGI_novel_G002459	0.215	9.015	5.36729	2.2533e-95	1.47053e-95		GO:0044424//intracellular part;GO:0043226//organelle;GO:0044464//cell part;GO:0043231//intracellular membrane-bounded organelle;GO:0005623//cell;GO:0043227//membrane-bounded organelle;GO:0005634//nucleus;GO:0043229//intracellular organelle;GO:0005622//intracellular;GO:0000981//RNA polymerase II transcription factor activity, sequence-specific DNA binding;GO:0097159//organic cyclic compound bindin…
BGI_novel_G002465	3.495	14.955	2.09833	5.11548e-61	4.70007e-61			K04733//interleukin-1 receptor-associated kinase 4 [EC:2.7.11.1]
BGI_novel_G002466	0.14	5.4	5.25551	1.63511e-31	2.31682e-31			K04733//interleukin-1 receptor-associated kinase 4 [EC:2.7.11.1]
BGI_novel_G002467	2.1	11.58	2.45754	4.5291e-66	3.94192e-66			K04733//interleukin-1 receptor-associated kinase 4 [EC:2.7.11.1]
BGI_novel_G002472	0	0.475	5.63778	1.1579e-07	3.30113e-07			K03405//magnesium chelatase subunit I [EC:6.6.1.1]+ko00860//Porphyrin and chlorophyll metabolism+ko01100//Metabolic pathways+ko01110//Biosynthesis of secondary metabolites
BGI_novel_G002478	0	1.205	6.72145	9.39077e-14	2.07174e-13			K04733//interleukin-1 receptor-associated kinase 4 [EC:2.7.11.1]
BGI_novel_G002481	0.02	1.095	5.73339	3.82088e-14	8.31673e-14			K04733//interleukin-1 receptor-associated kinase 4 [EC:2.7.11.1]
BGI_novel_G002485	0	1.01	6.18422	2.94474e-10	7.43962e-10			K04733//interleukin-1 receptor-associated kinase 4 [EC:2.7.11.1]
BGI_novel_G002489	0.14	3.32	4.5723	4.32608e-28	6.55874e-28
BGI_novel_G002491	3.03	34.7	3.51381	3.94254e-203	1.28377e-203		GO:0016020//membrane;GO:0031224//intrinsic component of membrane;GO:0044425//membrane part;GO:0016021//integral component of membrane;GO:0016491//oxidoreductase activity;GO:0043167//ion binding;GO:0020037//heme binding;GO:0046914//transition metal ion binding;GO:0004497//monooxygenase activity;GO:1901363//heterocyclic compound binding;GO:0003824//catalytic activity;GO:0005506//iron ion binding;GO…	K22983//cytochrome P450 family 76 subfamily A
BGI_novel_G002496	0.32	1.265	1.98429	6.28131e-06	1.98427e-05			K20286//TATA element modulatory factor
BGI_novel_G002499	0.935	2.825	1.62032	0.000915667	0.00343617			K07466//replication factor A1+ko03420//Nucleotide excision repair+ko03030//DNA replication+ko03440//Homologous recombination+ko03430//Mismatch repair
BGI_novel_G002500	16.09	1224.53	6.24523	0	0		GO:0046872//metal ion binding;GO:0043169//cation binding;GO:0005488//binding;GO:0043167//ion binding;
BGI_novel_G002501	0.385	1.35	1.81463	2.95755e-05	9.80796e-05
BGI_novel_G002502	0.49	2.87	2.56902	4.89971e-08	1.36964e-07
BGI_novel_G002508	0.52	3.55	2.76636	1.77054e-24	2.90696e-24
BGI_novel_G002511	2.43	6.195	1.34379	8.67907e-12	2.05623e-11		GO:0043169//cation binding;GO:0005488//binding;GO:0097159//organic cyclic compound binding;GO:0046872//metal ion binding;GO:0003676//nucleic acid binding;GO:0003723//RNA binding;GO:0043167//ion binding;GO:1901363//heterocyclic compound binding;	K21444//poly(rC)-binding protein 3/4
BGI_novel_G002517	0.35	0.97	1.46161	0.00012103	0.000419487		GO:0019359//nicotinamide nucleotide biosynthetic process;GO:0006090//pyruvate metabolic process;GO:0017144//drug metabolic process;GO:0009259//ribonucleotide metabolic process;GO:0072525//pyridine-containing compound biosynthetic process;GO:0019438//aromatic compound biosynthetic process;GO:0009127//purine nucleoside monophosphate biosynthetic process;GO:0009185//ribonucleoside diphosphate metabo…	K01623//fructose-bisphosphate aldolase, class I [EC:4.1.2.13]+ko00010//Glycolysis / Gluconeogenesis+ko00030//Pentose phosphate pathway+ko01230//Biosynthesis of amino acids+ko01100//Metabolic pathways+ko00051//Fructose and mannose metabolism+ko01110//Biosynthesis of secondary metabolites+ko00710//Carbon fixation in photosynthetic organisms+ko01200//Carbon metabolism
BGI_novel_G002518	0.03	1.025	5.19256	2.58014e-13	5.77771e-13		GO:0009108//coenzyme biosynthetic process;GO:0072521//purine-containing compound metabolic process;GO:0051188//cofactor biosynthetic process;GO:0006754//ATP biosynthetic process;GO:0046390//ribose phosphate biosynthetic process;GO:0009132//nucleoside diphosphate metabolic process;GO:1901576//organic substance biosynthetic process;GO:0009124//nucleoside monophosphate biosynthetic process;GO:000616…	K01623//fructose-bisphosphate aldolase, class I [EC:4.1.2.13]+ko00010//Glycolysis / Gluconeogenesis+ko00030//Pentose phosphate pathway+ko01230//Biosynthesis of amino acids+ko01100//Metabolic pathways+ko00051//Fructose and mannose metabolism+ko01110//Biosynthesis of secondary metabolites+ko00710//Carbon fixation in photosynthetic organisms+ko01200//Carbon metabolism
BGI_novel_G002519	0.555	3.15	2.48325	6.07236e-14	1.3313e-13		GO:0009987//cellular process;GO:0005975//carbohydrate metabolic process;GO:0009144//purine nucleoside triphosphate metabolic process;GO:0006139//nucleobase-containing compound metabolic process;GO:0009167//purine ribonucleoside monophosphate metabolic process;GO:0006753//nucleoside phosphate metabolic process;GO:0009199//ribonucleoside triphosphate metabolic process;GO:0006757//ATP generation fro…	K01623//fructose-bisphosphate aldolase, class I [EC:4.1.2.13]+ko00010//Glycolysis / Gluconeogenesis+ko00030//Pentose phosphate pathway+ko01230//Biosynthesis of amino acids+ko01100//Metabolic pathways+ko00051//Fructose and mannose metabolism+ko01110//Biosynthesis of secondary metabolites+ko00710//Carbon fixation in photosynthetic organisms+ko01200//Carbon metabolism
BGI_novel_G002521	0.245	1.79	2.84947	6.33782e-14	1.39027e-13			K10268//F-box and leucine-rich repeat protein 2/20;K14288//exportin-T+ko03013//RNA transport;K15227//arogenate dehydrogenase (NADP+), plant [EC:1.3.1.78]+ko01230//Biosynthesis of amino acids+ko01100//Metabolic pathways+ko01110//Biosynthesis of secondary metabolites+ko00400//Phenylalanine, tyrosine and tryptophan biosynthesis;K00430//peroxidase [EC:1.11.1.7]+ko01100//Metabolic pathways+ko01110//Bi…
BGI_novel_G002542	1.245	18.7	3.89031	3.26239e-90	2.23875e-90			K01537//Ca2+-transporting ATPase [EC:3.6.3.8]
BGI_novel_G002545	0.33	5.49	4.06902	1.33916e-21	2.35115e-21			K03006//DNA-directed RNA polymerase II subunit RPB1 [EC:2.7.7.6]+ko03020//RNA polymerase
BGI_novel_G002546	0.915	8.905	3.283	2.16466e-31	3.0784e-31			K10955//mucin-2
BGI_novel_G002551	0.185	13.955	6.22023	4.05551e-103	2.48618e-103			K00083//cinnamyl-alcohol dehydrogenase [EC:1.1.1.195]+ko01100//Metabolic pathways+ko01110//Biosynthesis of secondary metabolites+ko00940//Phenylpropanoid biosynthesis
BGI_novel_G002556	0.215	3.575	4.08042	3.10392e-21	5.505e-21			K15747//beta-ring hydroxylase [EC:1.14.-.-]+ko00906//Carotenoid biosynthesis+ko01100//Metabolic pathways+ko01110//Biosynthesis of secondary metabolites
BGI_novel_G002557	0.345	2.145	2.62971	1.51974e-21	2.67167e-21			K15747//beta-ring hydroxylase [EC:1.14.-.-]+ko00906//Carotenoid biosynthesis+ko01100//Metabolic pathways+ko01110//Biosynthesis of secondary metabolites
BGI_novel_G002559	0.43	1.96	2.17599	8.4715e-18	1.64823e-17
BGI_novel_G002561	9.245	40.95	2.15237	2.67242e-149	1.18217e-149			K17398//DNA (cytosine-5)-methyltransferase 3A [EC:2.1.1.37]+ko01100//Metabolic pathways+ko00270//Cysteine and methionine metabolism;K11649//SWI/SNF related-matrix-associated actin-dependent regulator of chromatin subfamily C;K14766//nucleolar protein 14;K04733//interleukin-1 receptor-associated kinase 4 [EC:2.7.11.1];K07304//peptide-methionine (S)-S-oxide reductase [EC:1.8.4.11]
BGI_novel_G002563	0.15	0.87	2.55964	3.01108e-14	6.53291e-14			K15400//omega-hydroxypalmitate O-feruloyl transferase [EC:2.3.1.188]+ko00073//Cutin, suberine and wax biosynthesis;K12447//UDP-sugar pyrophosphorylase [EC:2.7.7.64]+ko00520//Amino sugar and nucleotide sugar metabolism+ko00040//Pentose and glucuronate interconversions+ko01100//Metabolic pathways+ko00052//Galactose metabolism+ko00053//Ascorbate and aldarate metabolism
BGI_novel_G002564	0.49	11.025	4.49029	3.74744e-106	2.23491e-106		GO:0046872//metal ion binding;GO:0046914//transition metal ion binding;GO:0097159//organic cyclic compound binding;GO:0043169//cation binding;GO:0008270//zinc ion binding;GO:1901363//heterocyclic compound binding;GO:0043167//ion binding;GO:0003676//nucleic acid binding;GO:0005488//binding;	K10268//F-box and leucine-rich repeat protein 2/20;K14288//exportin-T+ko03013//RNA transport;K11752//diaminohydroxyphosphoribosylaminopyrimidine deaminase / 5-amino-6-(5-phosphoribosylamino)uracil reductase [EC:3.5.4.26 1.1.1.193]+ko00740//Riboflavin metabolism+ko01100//Metabolic pathways+ko01110//Biosynthesis of secondary metabolites
BGI_novel_G002566	42.28	469.425	3.47023	0	0		GO:0006810//transport;GO:0071702//organic substance transport;GO:0033036//macromolecule localization;GO:0006869//lipid transport;GO:0010876//lipid localization;GO:0051179//localization;GO:0051234//establishment of localization;
BGI_novel_G002573	0.12	1.41	3.54984	4.18253e-15	8.82782e-15			K03006//DNA-directed RNA polymerase II subunit RPB1 [EC:2.7.7.6]+ko03020//RNA polymerase;K17545//serine/threonine-protein kinase ULK4 [EC:2.7.11.1];K12447//UDP-sugar pyrophosphorylase [EC:2.7.7.64]+ko00520//Amino sugar and nucleotide sugar metabolism+ko00040//Pentose and glucuronate interconversions+ko01100//Metabolic pathways+ko00052//Galactose metabolism+ko00053//Ascorbate and aldarate metaboli…
BGI_novel_G002577	2.555	68.4	4.74933	1.13948e-196	3.82354e-197		GO:0044238//primary metabolic process;GO:0055114//oxidation-reduction process;GO:0019538//protein metabolic process;GO:0006091//generation of precursor metabolites and energy;GO:0006807//nitrogen compound metabolic process;GO:0018298//protein-chromophore linkage;GO:0044237//cellular metabolic process;GO:0009767//photosynthetic electron transport chain;GO:0071704//organic substance metabolic proce…	K02705//photosystem II CP43 chlorophyll apoprotein+ko01100//Metabolic pathways+ko00195//Photosynthesis
BGI_novel_G002580	14.73	31.525	1.09428	1.52607e-11	3.65075e-11
BGI_novel_G002582	0.12	9.98	6.33906	5.8213e-28	8.85054e-28		GO:0044421//extracellular region part;GO:0031012//extracellular matrix;GO:0005576//extracellular region;GO:0070011//peptidase activity, acting on L-amino acid peptides;GO:0008270//zinc ion binding;GO:0008233//peptidase activity;GO:0008237//metallopeptidase activity;GO:0046914//transition metal ion binding;GO:0003824//catalytic activity;GO:0004175//endopeptidase activity;GO:0046872//metal ion bind…	K01388//matrix metalloproteinase-1 (interstitial collagenase) [EC:3.4.24.7];K01402//matrix metalloproteinase-8 (neutrophil collagenase) [EC:3.4.24.34]
BGI_novel_G002597	8.705	17.74	1.02588	6.20201e-25	1.00671e-24			K02469//DNA gyrase subunit A [EC:5.99.1.3];K02178//checkpoint serine/threonine-protein kinase [EC:2.7.11.1];K12349//neutral ceramidase [EC:3.5.1.23]+ko00600//Sphingolipid metabolism+ko01100//Metabolic pathways;K11446//histone demethylase JARID1 [EC:1.14.11.-];K13336//peroxin-3+ko04146//Peroxisome
BGI_novel_G002599	1.3	2.865	1.1479	8.61028e-07	2.57198e-06
BGI_novel_G002607	0	3.17	6.85165	8.89764e-15	1.90068e-14		GO:0016021//integral component of membrane;GO:0016020//membrane;GO:0044425//membrane part;GO:0031224//intrinsic component of membrane;GO:0043169//cation binding;GO:0005488//binding;GO:0003824//catalytic activity;GO:0046872//metal ion binding;GO:0004842//ubiquitin-protein transferase activity;GO:0140096//catalytic activity, acting on a protein;GO:0016874//ligase activity;GO:0019787//ubiquitin-like…	K11975//E3 ubiquitin-protein ligase RNF144 [EC:2.3.2.31]
BGI_novel_G002612	50.875	239.31	2.22784	0	0
BGI_novel_G002613	0	0.845	4.76238	6.21446e-05	0.000210848			K03006//DNA-directed RNA polymerase II subunit RPB1 [EC:2.7.7.6]+ko03020//RNA polymerase
BGI_novel_G002614	0	2.05	4.55619	0.000177703	0.000624416
BGI_novel_G002616	0.5	3.34	2.72903	7.88119e-07	2.34817e-06		GO:0005975//carbohydrate metabolic process;GO:0044238//primary metabolic process;GO:0008152//metabolic process;GO:0071704//organic substance metabolic process;GO:0016798//hydrolase activity, acting on glycosyl bonds;GO:0004565//beta-galactosidase activity;GO:0003824//catalytic activity;GO:0004553//hydrolase activity, hydrolyzing O-glycosyl compounds;GO:0015925//galactosidase activity;GO:0016787//…	K12309//beta-galactosidase [EC:3.2.1.23]+ko00600//Sphingolipid metabolism+ko00604//Glycosphingolipid biosynthesis - ganglio series+ko00531//Glycosaminoglycan degradation+ko00511//Other glycan degradation+ko01100//Metabolic pathways+ko00052//Galactose metabolism
BGI_novel_G002617	0.62	3.63	2.54927	3.98458e-17	7.88885e-17
BGI_novel_G002621	0.46	2.04	2.14465	5.59065e-12	1.31376e-11		GO:0050789//regulation of biological process;GO:0051716//cellular response to stimulus;GO:0050896//response to stimulus;GO:0035556//intracellular signal transduction;GO:0009987//cellular process;GO:0023052//signaling;GO:0007154//cell communication;GO:0050794//regulation of cellular process;GO:0007165//signal transduction;GO:0065007//biological regulation;GO:0005623//cell;GO:0044464//cell part;GO:…
BGI_novel_G002623	0.315	1.695	2.44254	1.8766e-10	4.7015e-10			K17434//large subunit ribosomal protein L53
BGI_novel_G002629	0.205	0.955	2.21173	0.000288912	0.00103293			K00284//glutamate synthase (ferredoxin) [EC:1.4.7.1]+ko00910//Nitrogen metabolism+ko00630//Glyoxylate and dicarboxylate metabolism;K18195//rhamnogalacturonan endolyase [EC:4.2.2.23];K12447//UDP-sugar pyrophosphorylase [EC:2.7.7.64]+ko00520//Amino sugar and nucleotide sugar metabolism+ko00040//Pentose and glucuronate interconversions+ko01100//Metabolic pathways+ko00052//Galactose metabolism+ko0005…
BGI_novel_G002642	0.395	1.55	1.97189	4.63121e-05	0.000155663		GO:0009987//cellular process;GO:0006457//protein folding;GO:0061077//chaperone-mediated protein folding;GO:0044464//cell part;GO:0005622//intracellular;GO:0005737//cytoplasm;GO:0005623//cell;GO:0044424//intracellular part;GO:0003755//peptidyl-prolyl cis-trans isomerase activity;GO:0005528//FK506 binding;GO:0005527//macrolide binding;GO:0005488//binding;GO:0003824//catalytic activity;GO:1901363//h…	K01802//peptidylprolyl isomerase [EC:5.2.1.8]
BGI_novel_G002643	0	3.075	7.00389	4.51576e-16	9.23927e-16		GO:0003824//catalytic activity;GO:0140096//catalytic activity, acting on a protein;GO:0016859//cis-trans isomerase activity;GO:0016853//isomerase activity;GO:0003755//peptidyl-prolyl cis-trans isomerase activity;	K01802//peptidylprolyl isomerase [EC:5.2.1.8]
BGI_novel_G002649	0.28	2.235	2.98482	3.86387e-25	6.2382e-25		GO:0090407//organophosphate biosynthetic process;GO:0034641//cellular nitrogen compound metabolic process;GO:0006139//nucleobase-containing compound metabolic process;GO:0009165//nucleotide biosynthetic process;GO:0044249//cellular biosynthetic process;GO:0009161//ribonucleoside monophosphate metabolic process;GO:1901360//organic cyclic compound metabolic process;GO:0098660//inorganic ion transme…	K13431//signal recognition particle receptor subunit alpha+ko03060//Protein export;K02136//F-type H+-transporting ATPase subunit gamma+ko01100//Metabolic pathways+ko00190//Oxidative phosphorylation
BGI_novel_G002650	0.605	5.86	3.25901	8.03811e-72	6.56121e-72		GO:0044237//cellular metabolic process;GO:0098660//inorganic ion transmembrane transport;GO:0018130//heterocycle biosynthetic process;GO:0009142//nucleoside triphosphate biosynthetic process;GO:1901135//carbohydrate derivative metabolic process;GO:0009141//nucleoside triphosphate metabolic process;GO:0044249//cellular biosynthetic process;GO:0009199//ribonucleoside triphosphate metabolic process;…	K02136//F-type H+-transporting ATPase subunit gamma+ko01100//Metabolic pathways+ko00190//Oxidative phosphorylation
BGI_novel_G002661	0.935	11.785	3.64856	3.20196e-28	4.84028e-28
BGI_novel_G002665	0.045	12.66	8.12566	1.05308e-57	1.00441e-57
BGI_novel_G002678	0.1	0.34	1.79195	1.85952e-08	5.09456e-08			K01303//acylaminoacyl-peptidase [EC:3.4.19.1];K15718//linoleate 9S-lipoxygenase [EC:1.13.11.58]+ko00591//Linoleic acid metabolism;K19525//vacuolar protein sorting-associated protein 13A/C
evm.model.Contig1.101	1.495	3.535	1.4594	3.87469e-14	8.43682e-14	XP_022854539.1|3.4e-65|uncharacterized protein LOC111375860 [Olea europaea var. sylvestris]	GO:0046983//protein dimerization activity;GO:0005515//protein binding;GO:0005488//binding;	K06634//cyclin H+ko03420//Nucleotide excision repair+ko03022//Basal transcription factors;K22794//flavonol-3-O-glucoside/galactoside glucosyltransferase [EC:2.4.1.239 2.4.1.-]+ko00944//Flavone and flavonol biosynthesis;K01230//mannosyl-oligosaccharide alpha-1,2-mannosidase [EC:3.2.1.113]+ko04141//Protein processing in endoplasmic reticulum+ko00510//N-Glycan biosynthesis+ko01100//Metabolic pathway…
evm.model.Contig1.132	9.145	21.34	1.2254	2.03263e-24	3.3413e-24	XP_022876211.1|8.7e-126|chromatin remodeling protein SHL-like [Olea europaea var. sylvestris]	GO:0051213//dioxygenase activity;GO:0016491//oxidoreductase activity;GO:0032452//histone demethylase activity;GO:0140096//catalytic activity, acting on a protein;GO:0043167//ion binding;GO:0032451//demethylase activity;GO:0016705//oxidoreductase activity, acting on paired donors, with incorporation or reduction of molecular oxygen;GO:0005488//binding;GO:0043169//cation binding;GO:0003682//chromat…	K02603//origin recognition complex subunit 1;K02603//origin recognition complex subunit 1
evm.model.Contig1.158	8.275	30.48	1.87782	9.94565e-32	1.40208e-31	XP_022876260.1|3.0e-92|universal stress protein PHOS32-like [Olea europaea var. sylvestris]	GO:0005886//plasma membrane;GO:0071944//cell periphery;GO:0005623//cell;GO:0044464//cell part;GO:0016020//membrane;
evm.model.Contig1.159	31.16	163.18	2.38103	5.62106e-176	2.09744e-176	XP_022876261.1|4.4e-76|glycine-rich RNA-binding protein 2-like [Olea europaea var. sylvestris]	GO:1901363//heterocyclic compound binding;GO:0097159//organic cyclic compound binding;GO:0003723//RNA binding;GO:0005488//binding;GO:0003676//nucleic acid binding;	K13195//cold-inducible RNA-binding protein
evm.model.Contig1.164	389.855	1072.32	1.34502	0	0	NP_001307045.1|3.3e-63|glycine-rich RNA-binding protein [Solanum lycopersicum]	GO:1990904//ribonucleoprotein complex;GO:0032991//macromolecular complex;GO:0003723//RNA binding;GO:0005488//binding;GO:0003676//nucleic acid binding;GO:1901363//heterocyclic compound binding;GO:0097159//organic cyclic compound binding;	K13195//cold-inducible RNA-binding protein;K13195//cold-inducible RNA-binding protein;K12741//heterogeneous nuclear ribonucleoprotein A1/A3+ko03040//Spliceosome
evm.model.Contig1.189	2.57	6.48	1.29216	2.51187e-19	4.67796e-19	XP_011088331.1|1.2e-237|probable E3 ubiquitin-protein ligase ARI2 isoform X1 [Sesamum indicum]	GO:0045732//positive regulation of protein catabolic process;GO:0009987//cellular process;GO:0031331//positive regulation of cellular catabolic process;GO:0051247//positive regulation of protein metabolic process;GO:0051246//regulation of protein metabolic process;GO:0050789//regulation of biological process;GO:0031325//positive regulation of cellular metabolic process;GO:0042176//regulation of p…	K11968//ariadne-1 [EC:2.3.2.31];K11968//ariadne-1 [EC:2.3.2.31]
evm.model.Contig1.193	0.115	1.23	3.41869	0.00077305	0.00287759	XP_022864199.1|1.2e-68|CASP-like protein 5C1 [Olea europaea var. sylvestris]	GO:0044464//cell part;GO:0005623//cell;GO:0071944//cell periphery;GO:0016020//membrane;GO:0005886//plasma membrane;GO:0016021//integral component of membrane;GO:0044425//membrane part;GO:0031224//intrinsic component of membrane;
evm.model.Contig1.196	104.32	276.145	1.40812	2.44107e-283	5.65092e-284	XP_022876175.1|8.3e-43|CCG-binding protein 1-like [Olea europaea var. sylvestris]	GO:0009856//pollination;GO:0044706//multi-multicellular organism process;GO:0000003//reproduction;GO:0032502//developmental process;GO:0009605//response to external stimulus;GO:0048868//pollen tube development;GO:0022414//reproductive process;GO:0042330//taxis;GO:0003006//developmental process involved in reproduction;GO:0051704//multi-organism process;GO:0048856//anatomical structure development…
evm.model.Contig1.234	16.535	34.025	1.04444	7.72329e-61	7.10909e-61	XP_022897852.1|0.0e+00|probable quinone oxidoreductase [Olea europaea var. sylvestris]	GO:0016491//oxidoreductase activity;GO:0043167//ion binding;GO:0043169//cation binding;GO:0046914//transition metal ion binding;GO:0008270//zinc ion binding;GO:0005488//binding;GO:0046872//metal ion binding;GO:0003824//catalytic activity;	K07119//uncharacterized protein
evm.model.Contig1.252	0.89	25.735	4.859	5.30077e-188	1.85401e-188	XP_022868325.1|2.7e-257|scopoletin glucosyltransferase-like [Olea europaea var. sylvestris]	GO:0003824//catalytic activity;GO:0016757//transferase activity, transferring glycosyl groups;GO:0016758//transferase activity, transferring hexosyl groups;GO:0016740//transferase activity;	K14595//abscisate beta-glucosyltransferase [EC:2.4.1.263]+ko00906//Carotenoid biosynthesis+ko01100//Metabolic pathways+ko01110//Biosynthesis of secondary metabolites;K13496//UDP-glucosyl transferase 73C [EC:2.4.1.-]
evm.model.Contig1.253	1.125	22.125	4.29429	2.22273e-151	9.72716e-152	AVM80877.1|1.2e-220|UGT1, partial [Ligustrum quihoui]	GO:0016758//transferase activity, transferring hexosyl groups;GO:0016740//transferase activity;GO:0003824//catalytic activity;GO:0016757//transferase activity, transferring glycosyl groups;	K14595//abscisate beta-glucosyltransferase [EC:2.4.1.263]+ko00906//Carotenoid biosynthesis+ko01100//Metabolic pathways+ko01110//Biosynthesis of secondary metabolites
evm.model.Contig1.273	71.35	152.005	1.10131	6.10312e-243	1.66556e-243	XP_022876314.1|2.1e-218|3-oxo-Delta(4,5)-steroid 5-beta-reductase-like [Olea europaea var. sylvestris]	GO:0050662//coenzyme binding;GO:0003824//catalytic activity;GO:0048037//cofactor binding;GO:0005488//binding;	K22419//Delta4-3-oxosteroid 5beta-reductase [EC:1.3.1.3];K22419//Delta4-3-oxosteroid 5beta-reductase [EC:1.3.1.3];K22419//Delta4-3-oxosteroid 5beta-reductase [EC:1.3.1.3];K22419//Delta4-3-oxosteroid 5beta-reductase [EC:1.3.1.3]
evm.model.Contig1.274	34.48	83.465	1.27297	2.14235e-118	1.16505e-118	XP_022876315.1|1.6e-207|probable protein phosphatase 2C 63 [Olea europaea var. sylvestris]	GO:0004722//protein serine/threonine phosphatase activity;GO:0043169//cation binding;GO:0046872//metal ion binding;GO:0005488//binding;GO:0140096//catalytic activity, acting on a protein;GO:0003824//catalytic activity;GO:0016788//hydrolase activity, acting on ester bonds;GO:0016787//hydrolase activity;GO:0004721//phosphoprotein phosphatase activity;GO:0016791//phosphatase activity;GO:0043167//ion…	K01102//pyruvate dehydrogenase phosphatase [EC:3.1.3.43]
evm.model.Contig1.281	30.85	295.435	3.26057	0	0	XP_022876322.1|3.2e-133|zinc finger protein ZAT10-like [Olea europaea var. sylvestris]	GO:1901363//heterocyclic compound binding;GO:0097159//organic cyclic compound binding;GO:0005488//binding;GO:0003676//nucleic acid binding;	K22534//PR domain zinc finger protein 5;K05747//Wiskott-Aldrich syndrome protein+ko04144//Endocytosis
evm.model.Contig1.296	0	9.7	5.41869	7.75884e-07	2.31042e-06	XP_022876337.1|8.3e-24|uncharacterized protein LOC111394651 [Olea europaea var. sylvestris]
evm.model.Contig1.299	6.225	189.69	4.92728	0	0	XP_011088044.2|5.5e-284|probable zinc metallopeptidase EGY3, chloroplastic [Sesamum indicum]	GO:0044425//membrane part;GO:0016021//integral component of membrane;GO:0031224//intrinsic component of membrane;GO:0016020//membrane;GO:0008233//peptidase activity;GO:0070011//peptidase activity, acting on L-amino acid peptides;GO:0140096//catalytic activity, acting on a protein;GO:0016787//hydrolase activity;GO:0008237//metallopeptidase activity;GO:0003824//catalytic activity;
evm.model.Contig1.30	0.45	1.985	2.14115	7.32272e-06	2.32265e-05	XP_022859366.1|7.1e-133|NAC domain-containing protein 35-like [Olea europaea var. sylvestris]	GO:0006355//regulation of transcription, DNA-templated;GO:2001141//regulation of RNA biosynthetic process;GO:0080090//regulation of primary metabolic process;GO:0060255//regulation of macromolecule metabolic process;GO:0050794//regulation of cellular process;GO:0010468//regulation of gene expression;GO:1903506//regulation of nucleic acid-templated transcription;GO:0065007//biological regulation;G…	K00521//ferric-chelate reductase [EC:1.16.1.7];K13126//polyadenylate-binding protein+ko03015//mRNA surveillance pathway+ko03018//RNA degradation+ko03013//RNA transport;K03094//S-phase kinase-associated protein 1+ko04141//Protein processing in endoplasmic reticulum+ko04120//Ubiquitin mediated proteolysis
evm.model.Contig1.307	5.265	27.76	2.39846	2.80412e-107	1.65776e-107	PIN16208.1|1.4e-186|hypothetical protein CDL12_11142 [Handroanthus impetiginosus]
evm.model.Contig1.323	0.44	1.125	1.35052	0.000806967	0.00301112	XP_022899147.1|2.3e-226|DUF21 domain-containing protein At2g14520-like [Olea europaea var. sylvestris]	GO:0016021//integral component of membrane;GO:0044425//membrane part;GO:0031224//intrinsic component of membrane;GO:0016020//membrane;	K16302//metal transporter CNNM
evm.model.Contig1.338	18.34	65.775	1.84122	2.10591e-188	7.33349e-189	XP_022876352.1|4.5e-217|uncharacterized protein LOC111394661 [Olea europaea var. sylvestris]		K04422//mitogen-activated protein kinase kinase kinase 13 [EC:2.7.11.25];K17604//zinc finger SWIM domain-containing protein 3
evm.model.Contig1.358	21.825	47.305	1.07652	6.08391e-60	5.66051e-60	XP_022863499.1|3.2e-257|WD-40 repeat-containing protein MSI1 [Olea europaea var. sylvestris]	GO:0044464//cell part;GO:0005622//intracellular;GO:0005623//cell;GO:0043227//membrane-bounded organelle;GO:0005634//nucleus;GO:0044424//intracellular part;GO:0043226//organelle;GO:0043231//intracellular membrane-bounded organelle;GO:0043229//intracellular organelle;	K10752//histone-binding protein RBBP4;K10752//histone-binding protein RBBP4
evm.model.Contig1.365	29.965	117.13	1.7759	0	0	XP_022876389.1|2.2e-143|ABSCISIC ACID-INSENSITIVE 5-like protein 6 [Olea europaea var. sylvestris]	GO:0140110//transcription regulator activity;GO:0003700//DNA binding transcription factor activity;	K14432//ABA responsive element binding factor+ko04075//Plant hormone signal transduction;K14432//ABA responsive element binding factor+ko04075//Plant hormone signal transduction;K14432//ABA responsive element binding factor+ko04075//Plant hormone signal transduction
evm.model.Contig1.376	0.19	2.285	3.59557	3.39085e-54	3.38491e-54
evm.model.Contig1.381	14.605	33.715	1.20775	4.76977e-74	3.79937e-74	XP_022876401.1|0.0e+00|BRASSINOSTEROID INSENSITIVE 1-associated receptor kinase 1-like isoform X1 [Olea europaea var. sylvestris]		K13416//brassinosteroid insensitive 1-associated receptor kinase 1 [EC:2.7.10.1 2.7.11.1]+ko04016//MAPK signaling pathway - plant+ko04626//Plant-pathogen interaction+ko04075//Plant hormone signal transduction
evm.model.Contig1.388	2.4	8.425	1.8117	8.9881e-33	1.24196e-32	XP_022876415.1|7.9e-299|putative clathrin assembly protein At4g02650 [Olea europaea var. sylvestris]		K20043//clathrin coat assembly protein AP180
evm.model.Contig1.397	0	3.035	5.76975	3.25062e-08	9.00364e-08	XP_022876433.1|3.6e-68|peroxidase N1-like [Olea europaea var. sylvestris]	GO:0042744//hydrogen peroxide catabolic process;GO:0051187//cofactor catabolic process;GO:0044237//cellular metabolic process;GO:0006950//response to stress;GO:0016999//antibiotic metabolic process;GO:0009056//catabolic process;GO:0008152//metabolic process;GO:0051186//cofactor metabolic process;GO:0017144//drug metabolic process;GO:0072593//reactive oxygen species metabolic process;GO:0017001//a…	K00430//peroxidase [EC:1.11.1.7]+ko01100//Metabolic pathways+ko01110//Biosynthesis of secondary metabolites+ko00940//Phenylpropanoid biosynthesis
evm.model.Contig1.401	1.015	7.865	3.00349	9.80454e-34	1.3302e-33	PIN07044.1|2.7e-147|Peroxidase [Handroanthus impetiginosus]	GO:0006979//response to oxidative stress;GO:0009987//cellular process;GO:0042737//drug catabolic process;GO:0009056//catabolic process;GO:0042744//hydrogen peroxide catabolic process;GO:0016999//antibiotic metabolic process;GO:0072593//reactive oxygen species metabolic process;GO:0008152//metabolic process;GO:0006950//response to stress;GO:0044248//cellular catabolic process;GO:0051187//cofactor …	K00430//peroxidase [EC:1.11.1.7]+ko01100//Metabolic pathways+ko01110//Biosynthesis of secondary metabolites+ko00940//Phenylpropanoid biosynthesis;K00430//peroxidase [EC:1.11.1.7]+ko01100//Metabolic pathways+ko01110//Biosynthesis of secondary metabolites+ko00940//Phenylpropanoid biosynthesis;K00430//peroxidase [EC:1.11.1.7]+ko01100//Metabolic pathways+ko01110//Biosynthesis of secondary metabolites…
evm.model.Contig1.402	0.525	9.535	4.40447	1.7874e-53	1.80012e-53	PIN07044.1|1.9e-148|Peroxidase [Handroanthus impetiginosus]	GO:0051187//cofactor catabolic process;GO:0050896//response to stimulus;GO:0044237//cellular metabolic process;GO:0042737//drug catabolic process;GO:0042744//hydrogen peroxide catabolic process;GO:0009987//cellular process;GO:0044248//cellular catabolic process;GO:0042743//hydrogen peroxide metabolic process;GO:0017144//drug metabolic process;GO:0006979//response to oxidative stress;GO:0072593//r…	K00430//peroxidase [EC:1.11.1.7]+ko01100//Metabolic pathways+ko01110//Biosynthesis of secondary metabolites+ko00940//Phenylpropanoid biosynthesis;K00430//peroxidase [EC:1.11.1.7]+ko01100//Metabolic pathways+ko01110//Biosynthesis of secondary metabolites+ko00940//Phenylpropanoid biosynthesis;K00430//peroxidase [EC:1.11.1.7]+ko01100//Metabolic pathways+ko01110//Biosynthesis of secondary metabolites…
evm.model.Contig1.408	7.135	22.565	1.27338	9.96234e-57	9.62828e-57	XP_022876427.1|4.4e-130|serine/arginine-rich splicing factor SC35-like [Olea europaea var. sylvestris]	GO:0003676//nucleic acid binding;GO:1901363//heterocyclic compound binding;GO:0097159//organic cyclic compound binding;GO:0005488//binding;GO:0003723//RNA binding;	K12891//splicing factor, arginine/serine-rich 2+ko03040//Spliceosome;K12891//splicing factor, arginine/serine-rich 2+ko03040//Spliceosome;K12891//splicing factor, arginine/serine-rich 2+ko03040//Spliceosome;K12891//splicing factor, arginine/serine-rich 2+ko03040//Spliceosome;K12891//splicing factor, arginine/serine-rich 2+ko03040//Spliceosome
evm.model.Contig1.411	4.785	10.975	1.2157	1.34098e-16	2.69919e-16	XP_022898072.1|9.5e-116|metacaspase-1-like isoform X1 [Olea europaea var. sylvestris]		K22684//metacaspase-1 [EC:3.4.22.-];K22684//metacaspase-1 [EC:3.4.22.-]
evm.model.Contig1.412	0.555	2.43	2.04976	7.04744e-19	1.32809e-18	XP_022863284.1|0.0e+00|uncharacterized protein LOC111383404 [Olea europaea var. sylvestris]
evm.model.Contig1.468	0.96	3.4	1.81101	5.87246e-12	1.38124e-11	XP_022865093.1|6.7e-166|homeobox protein knotted-1-like 1 isoform X2 [Olea europaea var. sylvestris]	GO:0031323//regulation of cellular metabolic process;GO:1903506//regulation of nucleic acid-templated transcription;GO:0051252//regulation of RNA metabolic process;GO:0065007//biological regulation;GO:0060255//regulation of macromolecule metabolic process;GO:0006355//regulation of transcription, DNA-templated;GO:0009889//regulation of biosynthetic process;GO:0050794//regulation of cellular proces…	K16670//homeobox protein Meis2;K16670//homeobox protein Meis2;K16670//homeobox protein Meis2
evm.model.Contig1.487	21.05	75.285	1.83115	1.20137e-55	1.17724e-55	AFK38849.1|8.3e-22|unknown [Lotus japonicus]	GO:0031224//intrinsic component of membrane;GO:0016020//membrane;GO:0016021//integral component of membrane;GO:0044425//membrane part;	K03260//translation initiation factor 4G+ko03013//RNA transport;K03260//translation initiation factor 4G+ko03013//RNA transport
evm.model.Contig1.495	16.8	131.345	2.97005	1.29541e-267	3.18683e-268	XP_022852911.1|9.9e-103|germin-like protein 5-1 [Olea europaea var. sylvestris]	GO:0009987//cellular process;GO:0065007//biological regulation;GO:0010496//intercellular transport;GO:2000026//regulation of multicellular organismal development;GO:0051239//regulation of multicellular organismal process;GO:0050789//regulation of biological process;GO:0010497//plasmodesmata-mediated intercellular transport;GO:2000280//regulation of root development;GO:0051179//localization;GO:005…
evm.model.Contig1.502	0.71	2.41	1.76555	2.35278e-13	5.26354e-13	XP_022863838.1|0.0e+00|pentatricopeptide repeat-containing protein At1g14470 [Olea europaea var. sylvestris]	GO:0043169//cation binding;GO:0005488//binding;GO:0043167//ion binding;GO:0046872//metal ion binding;GO:0008270//zinc ion binding;GO:0046914//transition metal ion binding;	K22733//magnesium transporter;K06180//23S rRNA pseudouridine1911/1915/1917 synthase [EC:5.4.99.23]
evm.model.Contig1.503	1.49	29.76	4.32671	6.08595e-74	4.85614e-74	XP_022868476.1|3.2e-92|22.0 kDa class IV heat shock protein-like [Olea europaea var. sylvestris]		K13993//HSP20 family protein+ko04141//Protein processing in endoplasmic reticulum
evm.model.Contig1.504	40.195	74.28	1.02451	2.87104e-188	1.00155e-188	AML78511.1|0.0e+00|putative LOV domain-containing protein [Oxera pulchella]	GO:0000166//nucleotide binding;GO:0097159//organic cyclic compound binding;GO:0043167//ion binding;GO:0035639//purine ribonucleoside triphosphate binding;GO:0097367//carbohydrate derivative binding;GO:1901265//nucleoside phosphate binding;GO:0005488//binding;GO:0043168//anion binding;GO:0016773//phosphotransferase activity, alcohol group as acceptor;GO:0017076//purine nucleotide binding;GO:003255…	K20715//phototropin [EC:2.7.11.1];K20715//phototropin [EC:2.7.11.1];K20715//phototropin [EC:2.7.11.1];K20715//phototropin [EC:2.7.11.1];K20715//phototropin [EC:2.7.11.1];K20715//phototropin [EC:2.7.11.1];K20715//phototropin [EC:2.7.11.1];K20715//phototropin [EC:2.7.11.1];K20715//phototropin [EC:2.7.11.1];K20715//phototropin [EC:2.7.11.1];K20715//phototropin [EC:2.7.11.1]
evm.model.Contig1.516	0.79	6.375	3.10085	1.30604e-54	1.29737e-54	XP_022876606.1|3.5e-149|phosphatidylinositol 4-phosphate 5-kinase 6-like isoform X3 [Olea europaea var. sylvestris]	GO:0036094//small molecule binding;GO:0016772//transferase activity, transferring phosphorus-containing groups;GO:1901363//heterocyclic compound binding;GO:0032555//purine ribonucleotide binding;GO:0016307//phosphatidylinositol phosphate kinase activity;GO:0000166//nucleotide binding;GO:0043168//anion binding;GO:0017076//purine nucleotide binding;GO:0016773//phosphotransferase activity, alcohol g…	K00889//1-phosphatidylinositol-4-phosphate 5-kinase [EC:2.7.1.68]+ko04144//Endocytosis+ko01100//Metabolic pathways+ko04070//Phosphatidylinositol signaling system+ko00562//Inositol phosphate metabolism;K00889//1-phosphatidylinositol-4-phosphate 5-kinase [EC:2.7.1.68]+ko04144//Endocytosis+ko01100//Metabolic pathways+ko04070//Phosphatidylinositol signaling system+ko00562//Inositol phosphate metaboli…
evm.model.Contig1.517	6.39	27.465	2.10564	3.41187e-77	2.63745e-77	XP_011088672.1|6.3e-148|uncharacterized protein LOC105169824 isoform X1 [Sesamum indicum]
evm.model.Contig1.53	2.33	5.77	1.23328	1.49777e-14	3.22144e-14	XP_022869963.1|3.5e-276|V-type proton ATPase subunit B2 [Olea europaea var. sylvestris]		K02147//V-type H+-transporting ATPase subunit B+ko04145//Phagosome+ko01100//Metabolic pathways+ko00190//Oxidative phosphorylation;K02147//V-type H+-transporting ATPase subunit B+ko04145//Phagosome+ko01100//Metabolic pathways+ko00190//Oxidative phosphorylation
evm.model.Contig1.533	6.695	18.35	1.44995	1.17953e-51	1.21441e-51	XP_019258909.1|2.0e-95|PREDICTED: SAC3 family protein C isoform X3 [Nicotiana attenuata]
evm.model.Contig1.541	0.7	3.685	2.40733	2.12589e-36	2.7595e-36	XP_022876633.1|2.4e-304|probable serine/threonine-protein kinase kinX [Olea europaea var. sylvestris]		K18626//trichohyalin;K11267//sister chromatid cohesion protein PDS5;K18626//trichohyalin;K11267//sister chromatid cohesion protein PDS5
evm.model.Contig1.547	0.875	2.14	1.29178	5.31776e-07	1.56881e-06	XP_022876641.1|1.0e-31|pheophytinase, chloroplastic-like isoform X2 [Olea europaea var. sylvestris]
evm.model.Contig1.66	7.87	20.38	1.35118	2.43937e-12	5.65333e-12	XP_019230782.1|1.9e-50|PREDICTED: uncharacterized protein LOC109211672 [Nicotiana attenuata]		K20815//N-terminal acetyltransferase 2;K20815//N-terminal acetyltransferase 2
evm.model.Contig1.75	30.135	69.315	1.20177	6.85007e-68	5.82593e-68	XP_022873082.1|2.9e-136|basic leucine zipper 19-like [Olea europaea var. sylvestris]	GO:0003700//DNA binding transcription factor activity;GO:0140110//transcription regulator activity;
evm.model.Contig10.104	15.14	31.375	1.04746	7.37004e-104	4.4832e-104	XP_011073420.1|0.0e+00|topless-related protein 4 [Sesamum indicum]	GO:0019222//regulation of metabolic process;GO:2000112//regulation of cellular macromolecule biosynthetic process;GO:0031326//regulation of cellular biosynthetic process;GO:0009889//regulation of biosynthetic process;GO:0060255//regulation of macromolecule metabolic process;GO:0050789//regulation of biological process;GO:0051171//regulation of nitrogen compound metabolic process;GO:0010556//regul…	K14963//COMPASS component SWD3;K22382//WD repeat-containing protein 26;K14963//COMPASS component SWD3;K22382//WD repeat-containing protein 26
evm.model.Contig10.111	3.345	8.255	1.30826	7.04931e-28	1.07402e-27	XP_022852019.1|0.0e+00|protein FAR1-RELATED SEQUENCE 8-like [Olea europaea var. sylvestris]	GO:0051252//regulation of RNA metabolic process;GO:0006355//regulation of transcription, DNA-templated;GO:1903506//regulation of nucleic acid-templated transcription;GO:0080090//regulation of primary metabolic process;GO:2001141//regulation of RNA biosynthetic process;GO:2000112//regulation of cellular macromolecule biosynthetic process;GO:0019222//regulation of metabolic process;GO:0019219//regu…	K17604//zinc finger SWIM domain-containing protein 3
evm.model.Contig10.118	7.23	35.67	2.30666	5.36177e-264	1.33707e-264	XP_022862178.1|0.0e+00|F-box/LRR-repeat protein 14 isoform X1 [Olea europaea var. sylvestris]		K10280//F-box and leucine-rich repeat protein 14;K10268//F-box and leucine-rich repeat protein 2/20;K10280//F-box and leucine-rich repeat protein 14;K10280//F-box and leucine-rich repeat protein 14
evm.model.Contig10.135	0	1.905	6.18422	2.94474e-10	7.43962e-10	XP_022853959.1|5.4e-139|probable WRKY transcription factor 40 [Olea europaea var. sylvestris]	GO:0005623//cell;GO:0005622//intracellular;GO:0043231//intracellular membrane-bounded organelle;GO:0044464//cell part;GO:0043229//intracellular organelle;GO:0043227//membrane-bounded organelle;GO:0005634//nucleus;GO:0044424//intracellular part;GO:0043226//organelle;GO:1901363//heterocyclic compound binding;GO:0140110//transcription regulator activity;GO:0003700//DNA binding transcription factor a…	K18834//WRKY transcription factor 1+ko04626//Plant-pathogen interaction
evm.model.Contig10.142	41.34	111.09	1.42311	3.15242e-209	9.97104e-210	XP_022853964.1|9.8e-246|shikimate O-hydroxycinnamoyltransferase isoform X1 [Olea europaea var. sylvestris]	GO:0003824//catalytic activity;GO:0016740//transferase activity;GO:0016746//transferase activity, transferring acyl groups;GO:0016747//transferase activity, transferring acyl groups other than amino-acyl groups;	K13065//shikimate O-hydroxycinnamoyltransferase [EC:2.3.1.133]+ko01100//Metabolic pathways+ko01110//Biosynthesis of secondary metabolites+ko00940//Phenylpropanoid biosynthesis+ko00941//Flavonoid biosynthesis+ko00945//Stilbenoid, diarylheptanoid and gingerol biosynthesis
evm.model.Contig10.145	1.22	21.69	4.15072	3.85298e-152	1.67614e-152	XP_010034044.1|3.6e-249|PREDICTED: heat shock 70 kDa protein [Eucalyptus grandis]	GO:0051707//response to other organism;GO:0009266//response to temperature stimulus;GO:0043207//response to external biotic stimulus;GO:0009607//response to biotic stimulus;GO:0009615//response to virus;GO:0050896//response to stimulus;GO:0009605//response to external stimulus;GO:0006950//response to stress;GO:0009408//response to heat;GO:0051704//multi-organism process;GO:0009628//response to ab…	K03283//heat shock 70kDa protein 1/2/6/8+ko03040//Spliceosome+ko04144//Endocytosis+ko04141//Protein processing in endoplasmic reticulum
evm.model.Contig10.149	12.585	35.26	1.53355	1.32448e-111	7.56098e-112	XP_022859025.1|5.0e-249|uncharacterized protein LOC111379823 isoform X1 [Olea europaea var. sylvestris]
evm.model.Contig10.157	11.55	47.62	2.04929	0	0	XP_011073259.1|0.0e+00|chaperone protein ClpD, chloroplastic [Sesamum indicum]	GO:0008152//metabolic process;GO:1901564//organonitrogen compound metabolic process;GO:0044238//primary metabolic process;GO:0019538//protein metabolic process;GO:0071704//organic substance metabolic process;GO:0043170//macromolecule metabolic process;GO:0006807//nitrogen compound metabolic process;GO:0097159//organic cyclic compound binding;GO:0030554//adenyl nucleotide binding;GO:0008144//drug …	K03696//ATP-dependent Clp protease ATP-binding subunit ClpC;K03696//ATP-dependent Clp protease ATP-binding subunit ClpC
evm.model.Contig10.167	52.105	137.67	1.40655	6.89642e-289	1.548e-289	XP_022842989.1|2.1e-222|uncharacterized protein LOC111366462 isoform X1 [Olea europaea var. sylvestris]	GO:0016021//integral component of membrane;GO:0031224//intrinsic component of membrane;GO:0016020//membrane;GO:0044425//membrane part;
evm.model.Contig10.174	0.195	1.99	3.37127	1.54656e-07	4.43779e-07	XP_022842968.1|1.5e-121|ethylene-responsive transcription factor ERF114-like [Olea europaea var. sylvestris]	GO:0044424//intracellular part;GO:0043226//organelle;GO:0043231//intracellular membrane-bounded organelle;GO:0043227//membrane-bounded organelle;GO:0005622//intracellular;GO:0043229//intracellular organelle;GO:0044464//cell part;GO:0005634//nucleus;GO:0005623//cell;GO:1901363//heterocyclic compound binding;GO:0003700//DNA binding transcription factor activity;GO:0097159//organic cyclic compound b…	K12900//FUS-interacting serine-arginine-rich protein 1+ko03040//Spliceosome;K09286//EREBP-like factor
evm.model.Contig10.193	0.955	3.235	1.78482	0.000125633	0.000436267	XP_022842787.1|5.7e-85|protein C2-DOMAIN ABA-RELATED 4-like [Olea europaea var. sylvestris]		K01537//Ca2+-transporting ATPase [EC:3.6.3.8];K12486//stromal membrane-associated protein+ko04144//Endocytosis
evm.model.Contig10.20	1.625	4.035	1.31308	2.32056e-11	5.5964e-11	XP_022842610.1|2.1e-254|LOW QUALITY PROTEIN: uncharacterized protein LOC111366154 [Olea europaea var. sylvestris]
evm.model.Contig10.202	14.715	37.015	1.33123	4.00196e-67	3.43665e-67	XP_022842646.1|5.7e-235|ACT domain-containing protein ACR10-like [Olea europaea var. sylvestris]	GO:0016772//transferase activity, transferring phosphorus-containing groups;GO:0016779//nucleotidyltransferase activity;GO:0016740//transferase activity;GO:0140096//catalytic activity, acting on a protein;GO:0008773//[protein-PII] uridylyltransferase activity;GO:0070569//uridylyltransferase activity;GO:0003824//catalytic activity;
evm.model.Contig10.22	5.775	14.215	1.36558	9.42732e-90	6.49524e-90	XP_022842611.1|0.0e+00|mediator of RNA polymerase II transcription subunit 15a [Olea europaea var. sylvestris]		K03126//transcription initiation factor TFIID subunit 12+ko03022//Basal transcription factors;K03126//transcription initiation factor TFIID subunit 12+ko03022//Basal transcription factors
evm.model.Contig10.221	9.435	52.9	2.49137	3.84984e-180	1.40947e-180	XP_022841821.1|5.2e-195|12-oxophytodienoate reductase 1-like [Olea europaea var. sylvestris]	GO:0097159//organic cyclic compound binding;GO:0005488//binding;GO:0016491//oxidoreductase activity;GO:0043167//ion binding;GO:0097367//carbohydrate derivative binding;GO:0016627//oxidoreductase activity, acting on the CH-CH group of donors;GO:0016628//oxidoreductase activity, acting on the CH-CH group of donors, NAD or NADP as acceptor;GO:0032553//ribonucleotide binding;GO:0016629//12-oxophytodi…	K05894//12-oxophytodienoic acid reductase [EC:1.3.1.42]+ko00592//alpha-Linolenic acid metabolism+ko01100//Metabolic pathways+ko01110//Biosynthesis of secondary metabolites;K05894//12-oxophytodienoic acid reductase [EC:1.3.1.42]+ko00592//alpha-Linolenic acid metabolism+ko01100//Metabolic pathways+ko01110//Biosynthesis of secondary metabolites
evm.model.Contig10.238	1.08	4.02	1.89427	1.03095e-16	2.06632e-16	XP_022841937.1|2.9e-274|protein NRT1/ PTR FAMILY 5.5-like isoform X1 [Olea europaea var. sylvestris]	GO:0031224//intrinsic component of membrane;GO:0044425//membrane part;GO:0016020//membrane;GO:0016021//integral component of membrane;GO:0005215//transporter activity;GO:0022857//transmembrane transporter activity;	K14638//solute carrier family 15 (peptide/histidine transporter), member 3/4
evm.model.Contig10.25	2.47	8.325	1.74312	1.82257e-08	4.9911e-08	XP_022843251.1|4.0e-83|uncharacterized protein LOC111366786 [Olea europaea var. sylvestris]
evm.model.Contig10.255	13.61	28.515	1.08342	4.18446e-16	8.5544e-16	XP_009794784.1|4.3e-87|PREDICTED: heme-binding-like protein At3g10130, chloroplastic [Nicotiana sylvestris]		K13201//nucleolysin TIA-1/TIAR
evm.model.Contig10.259	0.48	71.155	7.19216	3.32804e-128	1.70154e-128	XP_022842094.1|8.4e-72|copper transporter 6-like [Olea europaea var. sylvestris]	GO:0016021//integral component of membrane;GO:0044425//membrane part;GO:0016020//membrane;GO:0031224//intrinsic component of membrane;GO:0015318//inorganic molecular entity transmembrane transporter activity;GO:0022890//inorganic cation transmembrane transporter activity;GO:0046873//metal ion transmembrane transporter activity;GO:0008324//cation transmembrane transporter activity;GO:0005215//tran…	K14686//solute carrier family 31 (copper transporter), member 1
evm.model.Contig10.271	1.13	9.77	3.12651	8.87543e-11	2.19334e-10	XP_022842140.1|2.6e-54|dynein light chain 1, cytoplasmic-like isoform X2 [Olea europaea var. sylvestris]	GO:0051345//positive regulation of hydrolase activity;GO:0043462//regulation of ATPase activity;GO:0044093//positive regulation of molecular function;GO:0065007//biological regulation;GO:0009987//cellular process;GO:0043085//positive regulation of catalytic activity;GO:0065009//regulation of molecular function;GO:0050790//regulation of catalytic activity;GO:0007017//microtubule-based process;GO:0…	K10418//dynein light chain LC8-type
evm.model.Contig10.28	2.505	49.57	4.2951	0	0	XP_022842628.1|2.0e-188|apyrase-like [Olea europaea var. sylvestris]	GO:0016787//hydrolase activity;GO:0003824//catalytic activity;	K14641//apyrase [EC:3.6.1.5]+ko00230//Purine metabolism+ko00240//Pyrimidine metabolism
evm.model.Contig10.291	4.305	11.305	1.57675	2.13392e-14	4.61056e-14	XP_022853259.1|1.0e-80|UPF0161 protein At3g09310 isoform X1 [Olea europaea var. sylvestris]		K08998//uncharacterized protein;K08998//uncharacterized protein;K08998//uncharacterized protein
evm.model.Contig10.293	5.71	26.45	2.21584	3.12641e-84	2.26152e-84	PIN04762.1|5.2e-193|Rhomboid family protein [Handroanthus impetiginosus]	GO:0031224//intrinsic component of membrane;GO:0016021//integral component of membrane;GO:0044425//membrane part;GO:0016020//membrane;GO:0008236//serine-type peptidase activity;GO:0016787//hydrolase activity;GO:0070011//peptidase activity, acting on L-amino acid peptides;GO:0017171//serine hydrolase activity;GO:0004252//serine-type endopeptidase activity;GO:0008233//peptidase activity;GO:0140096/…	K09651//rhomboid domain-containing protein 1 [EC:3.4.21.-];K00729//dolichyl-phosphate beta-glucosyltransferase [EC:2.4.1.117]+ko00510//N-Glycan biosynthesis+ko01100//Metabolic pathways
evm.model.Contig10.294	3.06	7.63	1.32256	6.05743e-19	1.13995e-18	XP_022869522.1|5.0e-218|transcription factor MYB3R-3-like [Olea europaea var. sylvestris]	GO:1903506//regulation of nucleic acid-templated transcription;GO:0045935//positive regulation of nucleobase-containing compound metabolic process;GO:0047484//regulation of response to osmotic stress;GO:0048522//positive regulation of cellular process;GO:0009266//response to temperature stimulus;GO:0006950//response to stress;GO:0065007//biological regulation;GO:0080090//regulation of primary met…	K09422//transcription factor MYB, plant;K09422//transcription factor MYB, plant;K09422//transcription factor MYB, plant
evm.model.Contig10.295	222.845	734.155	1.72502	5.32052e-205	1.72108e-205	XP_022853258.1|5.0e-34|metallothionein-like protein type 2 [Olea europaea var. sylvestris]	GO:0043167//ion binding;GO:0046872//metal ion binding;GO:0005488//binding;GO:0043169//cation binding;
evm.model.Contig10.327	0.98	11.485	3.54552	3.41014e-82	2.50532e-82	XP_022872756.1|1.5e-291|ankyrin repeat-containing protein At5g02620-like [Olea europaea var. sylvestris]	GO:0044464//cell part;GO:0000502//proteasome complex;GO:0005623//cell;GO:1902494//catalytic complex;GO:0044425//membrane part;GO:0031224//intrinsic component of membrane;GO:1905369//endopeptidase complex;GO:0032991//macromolecular complex;GO:0044424//intracellular part;GO:0005622//intracellular;GO:0016021//integral component of membrane;GO:1905368//peptidase complex;GO:0016020//membrane;	K15503//serine/threonine-protein phosphatase 6 regulatory ankyrin repeat subunit B;K01184//polygalacturonase [EC:3.2.1.15]+ko00040//Pentose and glucuronate interconversions+ko01100//Metabolic pathways
evm.model.Contig10.333	51.075	170.495	1.73994	1.4203e-216	4.35999e-217	XP_011094758.1|5.8e-107|glutathione S-transferase L3-like isoform X1 [Sesamum indicum]	GO:0003824//catalytic activity;GO:0016740//transferase activity;	K00799//glutathione S-transferase [EC:2.5.1.18]+ko00480//Glutathione metabolism
evm.model.Contig10.334	11.825	27.895	1.24025	1.49028e-38	1.86499e-38	XP_024978726.1|3.2e-176|probable serine/threonine-protein kinase PBL7 [Cynara cardunculus var. scolymus]	GO:0044267//cellular protein metabolic process;GO:0044260//cellular macromolecule metabolic process;GO:0010646//regulation of cell communication;GO:0006464//cellular protein modification process;GO:0048518//positive regulation of biological process;GO:0044237//cellular metabolic process;GO:0036211//protein modification process;GO:0006796//phosphate-containing compound metabolic process;GO:0043412…	K04733//interleukin-1 receptor-associated kinase 4 [EC:2.7.11.1]
evm.model.Contig10.339	3.455	10.635	1.62628	3.35542e-93	2.23542e-93	XP_022872758.1|0.0e+00|E3 ubiquitin-protein ligase UPL4 [Olea europaea var. sylvestris]	GO:0016740//transferase activity;GO:0140096//catalytic activity, acting on a protein;GO:0003824//catalytic activity;GO:0004842//ubiquitin-protein transferase activity;GO:0016874//ligase activity;GO:0019787//ubiquitin-like protein transferase activity;	K10590//E3 ubiquitin-protein ligase TRIP12 [EC:2.3.2.26]+ko04120//Ubiquitin mediated proteolysis
evm.model.Contig10.340	37.365	78.465	1.07276	2.33783e-170	9.00917e-171	XP_020553426.1|0.0e+00|pentatricopeptide repeat-containing protein At3g09650, chloroplastic [Sesamum indicum]		K17964//leucine-rich PPR motif-containing protein, mitochondrial
evm.model.Contig10.344	6.37	12.13	1.15565	5.93284e-19	1.11623e-18	XP_022872770.1|4.7e-93|uncharacterized protein LOC111391756 [Olea europaea var. sylvestris]	GO:0006399//tRNA metabolic process;GO:0090305//nucleic acid phosphodiester bond hydrolysis;GO:0009987//cellular process;GO:0071840//cellular component organization or biogenesis;GO:0006379//mRNA cleavage;GO:0016072//rRNA metabolic process;GO:0008152//metabolic process;GO:0034470//ncRNA processing;GO:0034641//cellular nitrogen compound metabolic process;GO:0006807//nitrogen compound metabolic proc…	K03538//ribonuclease P protein subunit POP4 [EC:3.1.26.5]+ko03013//RNA transport+ko03008//Ribosome biogenesis in eukaryotes;K03538//ribonuclease P protein subunit POP4 [EC:3.1.26.5]+ko03013//RNA transport+ko03008//Ribosome biogenesis in eukaryotes
evm.model.Contig10.37	183.31	773.375	2.08056	0	0	XP_022866573.1|3.9e-150|uncharacterized protein LOC111386345 isoform X1 [Olea europaea var. sylvestris]
evm.model.Contig10.371	0.505	1.01	1.00365	7.92823e-05	0.000270915	XP_022841612.1|0.0e+00|putative white-brown complex homolog protein 30 isoform X1 [Olea europaea var. sylvestris]	GO:0016021//integral component of membrane;GO:0044425//membrane part;GO:0016020//membrane;GO:0031224//intrinsic component of membrane;GO:0015419//ATPase-coupled sulfate transmembrane transporter activity;GO:0032553//ribonucleotide binding;GO:0043168//anion binding;GO:0043225//ATPase-coupled anion transmembrane transporter activity;GO:0043167//ion binding;GO:0005524//ATP binding;GO:0032555//purine…	K05681//ATP-binding cassette, subfamily G (WHITE), member 2+ko02010//ABC transporters;K21396//ATP-binding cassette, subfamily G (WHITE), eye pigment precursor transporter
evm.model.Contig10.378	25.265	180.89	2.82799	0	0	XP_022841479.1|2.9e-170|heavy metal-associated isoprenylated plant protein 3-like [Olea europaea var. sylvestris]	GO:0030001//metal ion transport;GO:0006811//ion transport;GO:0006812//cation transport;GO:0051179//localization;GO:0006810//transport;GO:0051234//establishment of localization;GO:0043169//cation binding;GO:0005488//binding;GO:0043167//ion binding;GO:0046872//metal ion binding;	K04733//interleukin-1 receptor-associated kinase 4 [EC:2.7.11.1];K10752//histone-binding protein RBBP4;K07213//copper chaperone
evm.model.Contig10.380	74.03	222.225	1.58772	1.13534e-112	6.44484e-113	XP_022861126.1|1.4e-62|dual specificity phosphatase Cdc25-like isoform X2 [Olea europaea var. sylvestris]		K18065//Cdc25 family phosphatase [EC:3.1.3.48 1.20.4.1]
evm.model.Contig10.384	80.695	290.445	1.85242	0	0	PIN21461.1|4.7e-159|Zn-finger protein [Handroanthus impetiginosus]	GO:0043167//ion binding;GO:0043169//cation binding;GO:0046872//metal ion binding;GO:0008270//zinc ion binding;GO:0046914//transition metal ion binding;GO:0005488//binding;	K10144//RING finger and CHY zinc finger domain-containing protein 1 [EC:2.3.2.27]+ko04120//Ubiquitin mediated proteolysis
evm.model.Contig10.389	1.395	4.18	1.58657	2.19563e-12	5.07939e-12	XP_022899595.1|2.1e-257|UDP-glycosyltransferase 73C6-like [Olea europaea var. sylvestris]		K13496//UDP-glucosyl transferase 73C [EC:2.4.1.-]
evm.model.Contig10.394	0.685	4.16	2.60866	5.92789e-25	9.61767e-25	XP_022899553.1|0.0e+00|wall-associated receptor kinase-like 20 [Olea europaea var. sylvestris]	GO:0044425//membrane part;GO:0016021//integral component of membrane;GO:0016020//membrane;GO:0031224//intrinsic component of membrane;GO:0001871//pattern binding;GO:0016740//transferase activity;GO:0030247//polysaccharide binding;GO:1901363//heterocyclic compound binding;GO:0097367//carbohydrate derivative binding;GO:0043168//anion binding;GO:0008144//drug binding;GO:0016772//transferase activity…	K04733//interleukin-1 receptor-associated kinase 4 [EC:2.7.11.1]
evm.model.Contig10.395	0.05	11.63	7.82808	3.3194e-95	2.16983e-95	XP_022899545.1|1.7e-308|probable glycosyltransferase At5g03795 [Olea europaea var. sylvestris]	GO:0009059//macromolecule biosynthetic process;GO:0043412//macromolecule modification;GO:1901576//organic substance biosynthetic process;GO:0043170//macromolecule metabolic process;GO:0044260//cellular macromolecule metabolic process;GO:0006486//protein glycosylation;GO:0044238//primary metabolic process;GO:1901135//carbohydrate derivative metabolic process;GO:0009100//glycoprotein metabolic proc…	K18789//xylogalacturonan beta-1,3-xylosyltransferase [EC:2.4.2.41];K18789//xylogalacturonan beta-1,3-xylosyltransferase [EC:2.4.2.41]
evm.model.Contig10.40	1.055	12.935	3.63281	3.14056e-37	4.01661e-37	PIN25375.1|1.9e-70|Molecular chaperone (small heat-shock protein Hsp26/Hsp42) [Handroanthus impetiginosus]		K13993//HSP20 family protein+ko04141//Protein processing in endoplasmic reticulum
evm.model.Contig10.406	15.235	40.57	1.41869	3.95163e-63	3.55042e-63	XP_022899451.1|3.8e-195|fructose-bisphosphate aldolase, cytoplasmic isozyme-like [Olea europaea var. sylvestris]	GO:0051186//cofactor metabolic process;GO:0072524//pyridine-containing compound metabolic process;GO:1901576//organic substance biosynthetic process;GO:0072525//pyridine-containing compound biosynthetic process;GO:0019439//aromatic compound catabolic process;GO:0009185//ribonucleoside diphosphate metabolic process;GO:0009135//purine nucleoside diphosphate metabolic process;GO:0016053//organic aci…	K01623//fructose-bisphosphate aldolase, class I [EC:4.1.2.13]+ko00010//Glycolysis / Gluconeogenesis+ko00030//Pentose phosphate pathway+ko01230//Biosynthesis of amino acids+ko01100//Metabolic pathways+ko00051//Fructose and mannose metabolism+ko01110//Biosynthesis of secondary metabolites+ko00710//Carbon fixation in photosynthetic organisms+ko01200//Carbon metabolism
evm.model.Contig10.408	0.255	1.47	2.52269	4.57632e-05	0.000153755	XP_022849641.1|1.4e-58|uncharacterized protein LOC111371737 isoform X2 [Olea europaea var. sylvestris]
evm.model.Contig10.41	1.85	17.72	2.98259	4.48788e-60	4.16938e-60	XP_022858043.1|8.4e-54|uncharacterized protein LOC111378970 isoform X2 [Olea europaea var. sylvestris]
evm.model.Contig10.42	15.555	160.97	3.3867	3.0135e-215	9.30601e-216	XP_011073435.1|4.9e-34|uncharacterized protein LOC105158387 [Sesamum indicum]
evm.model.Contig10.420	6.14	47.73	2.96026	1.25958e-68	1.0626e-68	XP_022899328.1|1.2e-79|zinc finger A20 and AN1 domain-containing stress-associated protein 4-like [Olea europaea var. sylvestris]	GO:0003676//nucleic acid binding;GO:0046914//transition metal ion binding;GO:0043167//ion binding;GO:0003677//DNA binding;GO:0046872//metal ion binding;GO:0008270//zinc ion binding;GO:0043169//cation binding;GO:1901363//heterocyclic compound binding;GO:0005488//binding;GO:0097159//organic cyclic compound binding;
evm.model.Contig10.432	1.675	3.59	1.10958	4.17178e-07	1.22295e-06	XP_011094331.1|2.0e-194|pentatricopeptide repeat-containing protein At2g36240 [Sesamum indicum]		K17964//leucine-rich PPR motif-containing protein, mitochondrial
evm.model.Contig10.435	2.545	19.39	2.91876	9.62351e-85	6.92598e-85	XP_022899273.1|2.7e-205|myb-related protein 2-like isoform X1 [Olea europaea var. sylvestris]		K06236//collagen, type I, alpha+ko04933//AGE-RAGE signaling pathway in diabetic complications;K01940//argininosuccinate synthase [EC:6.3.4.5]+ko00250//Alanine, aspartate and glutamate metabolism+ko00220//Arginine biosynthesis+ko01230//Biosynthesis of amino acids+ko01100//Metabolic pathways+ko01110//Biosynthesis of secondary metabolites;K14491//two-component response regulator ARR-B family+ko04075…
evm.model.Contig10.44	0.29	1.59	2.41869	0.000579475	0.00213162	XP_023885523.1|7.8e-77|signal peptidase complex catalytic subunit SEC11A-like [Quercus suber]	GO:0043170//macromolecule metabolic process;GO:0006518//peptide metabolic process;GO:0006465//signal peptide processing;GO:0051604//protein maturation;GO:0010467//gene expression;GO:0043603//cellular amide metabolic process;GO:0016485//protein processing;GO:0034641//cellular nitrogen compound metabolic process;GO:0019538//protein metabolic process;GO:0071704//organic substance metabolic process;G…	K13280//signal peptidase I [EC:3.4.21.89]+ko03060//Protein export
evm.model.Contig10.45	0.08	1.33	4.09676	1.80706e-05	5.89407e-05	XP_022866213.1|1.0e-102|uncharacterized protein LOC111386016 [Olea europaea var. sylvestris]	GO:0043436//oxoacid metabolic process;GO:0019752//carboxylic acid metabolic process;GO:0008152//metabolic process;GO:0006082//organic acid metabolic process;GO:0006807//nitrogen compound metabolic process;GO:0009987//cellular process;GO:0006520//cellular amino acid metabolic process;GO:0071704//organic substance metabolic process;GO:0044281//small molecule metabolic process;GO:1901564//organonitr…
evm.model.Contig10.462	8.075	18.21	1.15053	1.2145e-25	1.93742e-25	XP_022842779.1|9.4e-209|E3 ubiquitin-protein ligase PUB23-like [Olea europaea var. sylvestris]		K08332//vacuolar protein 8;K04733//interleukin-1 receptor-associated kinase 4 [EC:2.7.11.1];K10260//F-box and WD-40 domain protein 7+ko04120//Ubiquitin mediated proteolysis
evm.model.Contig10.464	25.685	130.675	2.3428	0	0	XP_022845552.1|0.0e+00|BEL1-like homeodomain protein 1 [Olea europaea var. sylvestris]	GO:0006355//regulation of transcription, DNA-templated;GO:0031323//regulation of cellular metabolic process;GO:0009889//regulation of biosynthetic process;GO:0019222//regulation of metabolic process;GO:0019219//regulation of nucleobase-containing compound metabolic process;GO:0065007//biological regulation;GO:0080090//regulation of primary metabolic process;GO:0060255//regulation of macromolecule…	K16670//homeobox protein Meis2;K15613//homeobox protein Meis1;K16670//homeobox protein Meis2;K15613//homeobox protein Meis1;K16670//homeobox protein Meis2;K15613//homeobox protein Meis1;K16670//homeobox protein Meis2;K15613//homeobox protein Meis1
evm.model.Contig10.465	39.67	83.53	1.07444	1.38204e-196	4.64167e-197	XP_011094235.1|0.0e+00|digalactosyldiacylglycerol synthase 1, chloroplastic [Sesamum indicum]	GO:0008378//galactosyltransferase activity;GO:0046481//digalactosyldiacylglycerol synthase activity;GO:0016758//transferase activity, transferring hexosyl groups;GO:0035250//UDP-galactosyltransferase activity;GO:0016740//transferase activity;GO:0008194//UDP-glycosyltransferase activity;GO:0016757//transferase activity, transferring glycosyl groups;GO:0003824//catalytic activity;	K09480//digalactosyldiacylglycerol synthase [EC:2.4.1.241]+ko01100//Metabolic pathways+ko00561//Glycerolipid metabolism
evm.model.Contig10.468	8.69	20.33	1.04888	5.78372e-29	8.614e-29	XP_022899370.1|2.4e-111|uncharacterized protein LOC111412676 [Olea europaea var. sylvestris]		K03283//heat shock 70kDa protein 1/2/6/8+ko03040//Spliceosome+ko04144//Endocytosis+ko04141//Protein processing in endoplasmic reticulum;K03283//heat shock 70kDa protein 1/2/6/8+ko03040//Spliceosome+ko04144//Endocytosis+ko04141//Protein processing in endoplasmic reticulum;K03283//heat shock 70kDa protein 1/2/6/8+ko03040//Spliceosome+ko04144//Endocytosis+ko04141//Protein processing in endoplasmic r…
evm.model.Contig10.471	0.69	6.425	3.21224	2.56855e-16	5.2168e-16	XP_022899358.1|4.7e-108|NDR1/HIN1-like protein 1 [Olea europaea var. sylvestris]	GO:0031224//intrinsic component of membrane;GO:0044425//membrane part;GO:0016020//membrane;GO:0016021//integral component of membrane;
evm.model.Contig10.6	0.6	3.545	2.52972	7.44447e-06	2.36252e-05	XP_022854816.1|2.4e-71|multiprotein-bridging factor 1c [Olea europaea var. sylvestris]	GO:0097159//organic cyclic compound binding;GO:0003676//nucleic acid binding;GO:0043565//sequence-specific DNA binding;GO:0005488//binding;GO:0003677//DNA binding;GO:1901363//heterocyclic compound binding;	K03627//putative transcription factor
evm.model.Contig100.12	11.515	26.975	1.22921	3.85957e-11	9.39467e-11	OLP79680.1|1.1e-06|hypothetical protein AK812_SmicGene39995 [Symbiodinium microadriaticum]		K17553//protein phosphatase 1 regulatory subunit 11;K01180//endo-1,3(4)-beta-glucanase [EC:3.2.1.6]
evm.model.Contig100.19	1.545	3.625	1.23972	1.00316e-07	2.84771e-07	XP_022850156.1|8.4e-240|F-box/FBD/LRR-repeat protein At2g04230-like isoform X1 [Olea europaea var. sylvestris]		K06911//uncharacterized protein;K01322//prolyl oligopeptidase [EC:3.4.21.26];K04733//interleukin-1 receptor-associated kinase 4 [EC:2.7.11.1]
evm.model.Contig100.28	4.655	23.705	2.35772	1.79572e-20	3.24903e-20	XP_022850148.1|5.5e-61|uncharacterized protein LOC111372179 [Olea europaea var. sylvestris]	GO:0031224//intrinsic component of membrane;GO:0016021//integral component of membrane;GO:0044425//membrane part;GO:0016020//membrane;
evm.model.Contig100.36	1.365	19.495	3.81558	1.35791e-18	2.58159e-18	XP_022889712.1|9.1e-19|uncharacterized protein LOC111405175 [Olea europaea var. sylvestris]	GO:0016021//integral component of membrane;GO:0044425//membrane part;GO:0016020//membrane;GO:0031224//intrinsic component of membrane;
evm.model.Contig100.40	0	2.15	6.85165	8.89764e-15	1.90068e-14	XP_011073421.2|5.0e-153|SNF1-related protein kinase regulatory subunit gamma-like PV42a [Sesamum indicum]	GO:0016740//transferase activity;GO:0016301//kinase activity;GO:0003824//catalytic activity;GO:0016772//transferase activity, transferring phosphorus-containing groups;	K07200//5'-AMP-activated protein kinase, regulatory gamma subunit;K07200//5'-AMP-activated protein kinase, regulatory gamma subunit
evm.model.Contig100.61	0.07	0.775	3.45783	5.61243e-06	1.76783e-05	XP_022850124.1|4.8e-72|pentatricopeptide repeat-containing protein At1g80550, mitochondrial-like [Olea europaea var. sylvestris]
evm.model.Contig100.63	1.475	3.64	1.08315	8.704e-08	2.46419e-07	XP_022850122.1|0.0e+00|PX domain-containing protein EREL2-like isoform X1 [Olea europaea var. sylvestris]		K20283//golgin subfamily A member 4;K20283//golgin subfamily A member 4
evm.model.Contig101.106	5.46	15.075	1.47638	6.3606e-39	7.90354e-39	XP_007045845.2|5.6e-187|PREDICTED: cell division control protein 48 homolog B [Theobroma cacao]	GO:0051301//cell division;GO:0009987//cellular process;GO:0044425//membrane part;GO:0016021//integral component of membrane;GO:0016020//membrane;GO:0031224//intrinsic component of membrane;GO:0008144//drug binding;GO:0035639//purine ribonucleoside triphosphate binding;GO:1901363//heterocyclic compound binding;GO:0000166//nucleotide binding;GO:0030554//adenyl nucleotide binding;GO:0017076//purine …	K13525//transitional endoplasmic reticulum ATPase+ko04141//Protein processing in endoplasmic reticulum;K13525//transitional endoplasmic reticulum ATPase+ko04141//Protein processing in endoplasmic reticulum
evm.model.Contig101.107	0	12.025	9.26669	8.49773e-56	8.31146e-56	XP_022862962.1|7.2e-168|putative methylesterase 11, chloroplastic [Olea europaea var. sylvestris]	GO:0016746//transferase activity, transferring acyl groups;GO:0016787//hydrolase activity;GO:0016740//transferase activity;GO:0003824//catalytic activity;	K13544//pheophorbidase [EC:3.1.1.82]+ko00860//Porphyrin and chlorophyll metabolism+ko01110//Biosynthesis of secondary metabolites
evm.model.Contig101.11	42.235	267.35	2.65313	0	0	XP_011071002.1|2.7e-137|sphinganine C4-monooxygenase 1-like [Sesamum indicum]	GO:1901576//organic substance biosynthetic process;GO:0044238//primary metabolic process;GO:0008152//metabolic process;GO:0071704//organic substance metabolic process;GO:0009058//biosynthetic process;GO:0006629//lipid metabolic process;GO:0008610//lipid biosynthetic process;GO:0031224//intrinsic component of membrane;GO:0044425//membrane part;GO:0016020//membrane;GO:0016021//integral component of…	K04713//sphinganine C4-monooxygenase [EC:1.14.18.5]+ko00600//Sphingolipid metabolism+ko01100//Metabolic pathways
evm.model.Contig101.110	1.79	9.355	2.31518	9.66723e-18	1.88338e-17	XP_022862967.1|1.6e-40|uncharacterized protein LOC111383125 [Olea europaea var. sylvestris]	GO:0022613//ribonucleoprotein complex biogenesis;GO:0071840//cellular component organization or biogenesis;GO:0044085//cellular component biogenesis;GO:0042274//ribosomal small subunit biogenesis;GO:0042254//ribosome biogenesis;
evm.model.Contig101.12	0.37	9.025	4.61461	1.59062e-60	1.47044e-60	XP_022863945.1|1.8e-207|protein PHYTOCHROME KINASE SUBSTRATE 1-like [Olea europaea var. sylvestris]	GO:0009628//response to abiotic stimulus;GO:0050896//response to stimulus;GO:0009605//response to external stimulus;GO:0009416//response to light stimulus;GO:0009638//phototropism;GO:0009637//response to blue light;GO:0009314//response to radiation;GO:0009606//tropism;GO:0016740//transferase activity;GO:0016772//transferase activity, transferring phosphorus-containing groups;GO:0016301//kinase ac…	K02184//formin 2;K05747//Wiskott-Aldrich syndrome protein+ko04144//Endocytosis
evm.model.Contig101.121	0.325	2.04	2.63281	2.43167e-06	7.49441e-06	XP_022878350.1|6.9e-116|truncated transcription factor CAULIFLOWER A-like [Olea europaea var. sylvestris]	GO:0031325//positive regulation of cellular metabolic process;GO:0045944//positive regulation of transcription from RNA polymerase II promoter;GO:0009891//positive regulation of biosynthetic process;GO:0009889//regulation of biosynthetic process;GO:0019219//regulation of nucleobase-containing compound metabolic process;GO:0010604//positive regulation of macromolecule metabolic process;GO:0006357/…	K09264//MADS-box transcription factor, plant
evm.model.Contig101.136	0.195	1.515	2.95474	6.71872e-07	1.99351e-06	XP_022881871.1|9.4e-174|uncharacterized protein LOC111398935 [Olea europaea var. sylvestris]		K01246//DNA-3-methyladenine glycosylase I [EC:3.2.2.20]+ko03410//Base excision repair
evm.model.Contig101.139	3.355	11.78	1.81426	1.90371e-76	1.48324e-76	XP_022881873.1|0.0e+00|DNA-directed RNA polymerase 1B, mitochondrial [Olea europaea var. sylvestris]	GO:0044249//cellular biosynthetic process;GO:1901360//organic cyclic compound metabolic process;GO:0034641//cellular nitrogen compound metabolic process;GO:0034654//nucleobase-containing compound biosynthetic process;GO:0044238//primary metabolic process;GO:0034645//cellular macromolecule biosynthetic process;GO:0006351//transcription, DNA-templated;GO:0044271//cellular nitrogen compound biosynth…	K10908//DNA-directed RNA polymerase, mitochondrial [EC:2.7.7.6]
evm.model.Contig101.140	5.52	27.34	2.30757	3.49996e-242	9.57823e-243	XP_022881874.1|0.0e+00|putative U-box domain-containing protein 42 [Olea europaea var. sylvestris]	GO:0140096//catalytic activity, acting on a protein;GO:0003824//catalytic activity;GO:0004842//ubiquitin-protein transferase activity;GO:0016740//transferase activity;GO:0019787//ubiquitin-like protein transferase activity;GO:0016874//ligase activity;	K08332//vacuolar protein 8
evm.model.Contig101.152	0.35	2.085	2.55619	1.24425e-11	2.96591e-11	XP_022864791.1|3.1e-256|uncharacterized protein LOC111384706 [Olea europaea var. sylvestris]	GO:0051704//multi-organism process;GO:0044419//interspecies interaction between organisms;GO:0005576//extracellular region;
evm.model.Contig101.160	9.47	34.625	1.85975	1.84622e-280	4.31056e-281	XP_022881896.1|0.0e+00|putative phospholipid-transporting ATPase 9 [Olea europaea var. sylvestris]	GO:0044425//membrane part;GO:0016021//integral component of membrane;GO:0031224//intrinsic component of membrane;GO:0016020//membrane;GO:0000166//nucleotide binding;GO:1901363//heterocyclic compound binding;GO:0016887//ATPase activity;GO:0036094//small molecule binding;GO:0016817//hydrolase activity, acting on acid anhydrides;GO:0005524//ATP binding;GO:0043169//cation binding;GO:0032555//purine r…	K01530//phospholipid-translocating ATPase [EC:7.6.2.1]
evm.model.Contig101.163	0.35	2.505	2.83011	1.30142e-23	2.1787e-23	XP_022881904.1|0.0e+00|phosphate transporter PHO1 homolog 1-like isoform X1 [Olea europaea var. sylvestris]		K14514//ethylene-insensitive protein 3+ko04016//MAPK signaling pathway - plant+ko04075//Plant hormone signal transduction
evm.model.Contig101.165	16.045	37.66	1.23697	2.29571e-145	1.03938e-145	XP_022881907.1|0.0e+00|phosphoenolpyruvate carboxylase 4-like isoform X1 [Olea europaea var. sylvestris]	GO:0072350//tricarboxylic acid metabolic process;GO:0044238//primary metabolic process;GO:0015980//energy derivation by oxidation of organic compounds;GO:0043436//oxoacid metabolic process;GO:0045333//cellular respiration;GO:0006091//generation of precursor metabolites and energy;GO:0055114//oxidation-reduction process;GO:0071704//organic substance metabolic process;GO:0006082//organic acid metab…	K01595//phosphoenolpyruvate carboxylase [EC:4.1.1.31]+ko01100//Metabolic pathways+ko00710//Carbon fixation in photosynthetic organisms+ko00620//Pyruvate metabolism+ko01200//Carbon metabolism;K01595//phosphoenolpyruvate carboxylase [EC:4.1.1.31]+ko01100//Metabolic pathways+ko00710//Carbon fixation in photosynthetic organisms+ko00620//Pyruvate metabolism+ko01200//Carbon metabolism
evm.model.Contig101.166	0	6.975	5.68172	7.66785e-08	2.1658e-07	PIN01013.1|4.3e-15|hypothetical protein CDL12_26477 [Handroanthus impetiginosus]	GO:0032502//developmental process;GO:0009838//abscission;GO:0003006//developmental process involved in reproduction;GO:0048608//reproductive structure development;GO:0032501//multicellular organismal process;GO:0009791//post-embryonic development;GO:0048367//shoot system development;GO:0000003//reproduction;GO:0048856//anatomical structure development;GO:0007275//multicellular organism developmen…
evm.model.Contig101.18	1.35	57.245	5.39765	3.00726e-183	1.08491e-183	XP_022858720.1|4.8e-119|zinc-finger homeodomain protein 10-like [Olea europaea var. sylvestris]	GO:1901363//heterocyclic compound binding;GO:0097159//organic cyclic compound binding;GO:0003677//DNA binding;GO:0003676//nucleic acid binding;GO:0005488//binding;	K15777//4,5-DOPA dioxygenase extradiol [EC:1.13.11.-]+ko00965//Betalain biosynthesis;K15601//lysine-specific demethylase 3 [EC:1.14.11.-]
evm.model.Contig101.19	0.93	3.195	1.78978	4.33375e-20	7.91993e-20	XP_022858709.1|0.0e+00|pentatricopeptide repeat-containing protein At3g20730-like [Olea europaea var. sylvestris]		K01176//alpha-amylase [EC:3.2.1.1]+ko01100//Metabolic pathways+ko00500//Starch and sucrose metabolism
evm.model.Contig101.20	39.92	131.81	1.7213	7.51983e-207	2.40723e-207	XP_022858713.1|2.2e-153|uncharacterized protein LOC111379553 [Olea europaea var. sylvestris]		K10661//E3 ubiquitin-protein ligase MARCH6 [EC:2.3.2.27]+ko04141//Protein processing in endoplasmic reticulum
evm.model.Contig101.22	2.11	4.72	1.31615	7.37302e-11	1.81485e-10	XP_022858717.1|1.9e-98|myb family transcription factor PHL8-like isoform X1 [Olea europaea var. sylvestris]	GO:0009059//macromolecule biosynthetic process;GO:0019222//regulation of metabolic process;GO:0043170//macromolecule metabolic process;GO:0010556//regulation of macromolecule biosynthetic process;GO:2000112//regulation of cellular macromolecule biosynthetic process;GO:0009987//cellular process;GO:0006725//cellular aromatic compound metabolic process;GO:0008152//metabolic process;GO:1901576//organ…	K06236//collagen, type I, alpha+ko04933//AGE-RAGE signaling pathway in diabetic complications;K14491//two-component response regulator ARR-B family+ko04075//Plant hormone signal transduction;K06236//collagen, type I, alpha+ko04933//AGE-RAGE signaling pathway in diabetic complications;K14491//two-component response regulator ARR-B family+ko04075//Plant hormone signal transduction
evm.model.Contig101.24	3.665	8.25	1.17034	5.96767e-11	1.46473e-10	XP_022878304.1|1.9e-143|cyclic dof factor 1-like [Olea europaea var. sylvestris]	GO:0080090//regulation of primary metabolic process;GO:2001141//regulation of RNA biosynthetic process;GO:0051252//regulation of RNA metabolic process;GO:0019222//regulation of metabolic process;GO:0050789//regulation of biological process;GO:0051171//regulation of nitrogen compound metabolic process;GO:0050794//regulation of cellular process;GO:0065007//biological regulation;GO:2000112//regulati…	K16222//Dof zinc finger protein DOF5.5+ko04712//Circadian rhythm - plant
evm.model.Contig101.30	0.16	1.7	3.36978	1.57471e-07	4.52072e-07	XP_022881834.1|6.4e-145|NAC transcription factor 29-like [Olea europaea var. sylvestris]	GO:0061458//reproductive system development;GO:0032501//multicellular organismal process;GO:0009889//regulation of biosynthetic process;GO:0080090//regulation of primary metabolic process;GO:0010556//regulation of macromolecule biosynthetic process;GO:2000112//regulation of cellular macromolecule biosynthetic process;GO:0048366//leaf development;GO:0009908//flower development;GO:0019222//regulati…	K00521//ferric-chelate reductase [EC:1.16.1.7];K13126//polyadenylate-binding protein+ko03015//mRNA surveillance pathway+ko03018//RNA degradation+ko03013//RNA transport;K12862//pleiotropic regulator 1+ko03040//Spliceosome;K16296//serine carboxypeptidase-like clade I [EC:3.4.16.-]
evm.model.Contig101.4	19.495	115.33	2.56353	1.95099e-174	7.34552e-175	XP_022868571.1|1.4e-87|uncharacterized protein LOC111388127 [Olea europaea var. sylvestris]
evm.model.Contig101.48	1.53	10.245	2.79237	7.12396e-26	1.13111e-25	XP_022887551.1|2.1e-88|uncharacterized protein LOC111403326 isoform X2 [Olea europaea var. sylvestris]
evm.model.Contig101.49	10.835	35.14	1.8565	4.29559e-162	1.73873e-162	XP_022881021.1|0.0e+00|CSC1-like protein At1g69450 [Olea europaea var. sylvestris]	GO:0016020//membrane;GO:0044425//membrane part;GO:0016021//integral component of membrane;GO:0031224//intrinsic component of membrane;	K21989//calcium permeable stress-gated cation channel;K21989//calcium permeable stress-gated cation channel;K21989//calcium permeable stress-gated cation channel
evm.model.Contig101.57	8.155	29.345	1.84098	1.61164e-117	8.82105e-118	PIN03695.1|1.1e-195|hypothetical protein CDL12_23770 [Handroanthus impetiginosus]	GO:0043229//intracellular organelle;GO:0043227//membrane-bounded organelle;GO:0044464//cell part;GO:0005623//cell;GO:0005622//intracellular;GO:0043226//organelle;GO:0005634//nucleus;GO:0043231//intracellular membrane-bounded organelle;GO:0044424//intracellular part;GO:1901363//heterocyclic compound binding;GO:0003700//DNA binding transcription factor activity;GO:0005488//binding;GO:0003676//nucle…	K08819//cyclin-dependent kinase 12/13 [EC:2.7.11.22 2.7.11.23];K13424//WRKY transcription factor 33+ko04016//MAPK signaling pathway - plant+ko04626//Plant-pathogen interaction;K18835//WRKY transcription factor 2+ko04626//Plant-pathogen interaction
evm.model.Contig101.61	36.27	276.185	2.93317	0	0	XP_022881851.1|1.1e-85|eukaryotic translation initiation factor 5A-2 [Olea europaea var. sylvestris]	GO:0019538//protein metabolic process;GO:0034645//cellular macromolecule biosynthetic process;GO:0010557//positive regulation of macromolecule biosynthetic process;GO:0010608//posttranscriptional regulation of gene expression;GO:0006412//translation;GO:0044249//cellular biosynthetic process;GO:0009059//macromolecule biosynthetic process;GO:0031323//regulation of cellular metabolic process;GO:0009…	K03263//translation initiation factor 5A
evm.model.Contig101.68	2.195	6.38	1.27294	2.30472e-28	3.47268e-28	XP_022852585.1|4.5e-21|uncharacterized protein LOC111374185 [Olea europaea var. sylvestris]	GO:0044260//cellular macromolecule metabolic process;GO:0006313//transposition, DNA-mediated;GO:1901360//organic cyclic compound metabolic process;GO:0044238//primary metabolic process;GO:0046483//heterocycle metabolic process;GO:0006139//nucleobase-containing compound metabolic process;GO:0090304//nucleic acid metabolic process;GO:0071704//organic substance metabolic process;GO:0034641//cellular…	K17086//transmembrane 9 superfamily member 2/4;K17604//zinc finger SWIM domain-containing protein 3
evm.model.Contig101.78	7.48	52.825	2.82158	1.60395e-136	7.68099e-137	XP_022852134.1|1.2e-132|probable WRKY transcription factor 57 [Olea europaea var. sylvestris]		K12835//ATP-dependent RNA helicase DDX42 [EC:3.6.4.13]+ko03040//Spliceosome;K18835//WRKY transcription factor 2+ko04626//Plant-pathogen interaction
evm.model.Contig101.86	5.67	15.35	1.43915	8.24845e-07	2.461e-06	PIN11468.1|8.6e-39|hypothetical protein CDL12_15936 [Handroanthus impetiginosus]	GO:1903506//regulation of nucleic acid-templated transcription;GO:0031326//regulation of cellular biosynthetic process;GO:0019222//regulation of metabolic process;GO:0006355//regulation of transcription, DNA-templated;GO:0031323//regulation of cellular metabolic process;GO:0050789//regulation of biological process;GO:0051171//regulation of nitrogen compound metabolic process;GO:0010556//regulatio…	K11343//MRG-binding protein
evm.model.Contig102.28	124.225	277.36	1.15964	0	0	XP_011081684.1|0.0e+00|glycine dehydrogenase (decarboxylating), mitochondrial [Sesamum indicum]	GO:0017144//drug metabolic process;GO:1901564//organonitrogen compound metabolic process;GO:1901565//organonitrogen compound catabolic process;GO:0016054//organic acid catabolic process;GO:0044248//cellular catabolic process;GO:0071704//organic substance metabolic process;GO:0044237//cellular metabolic process;GO:0065007//biological regulation;GO:0042135//neurotransmitter catabolic process;GO:190…	K00281//glycine dehydrogenase [EC:1.4.4.2]+ko01100//Metabolic pathways+ko01110//Biosynthesis of secondary metabolites+ko00260//Glycine, serine and threonine metabolism+ko01200//Carbon metabolism+ko00630//Glyoxylate and dicarboxylate metabolism;K00281//glycine dehydrogenase [EC:1.4.4.2]+ko01100//Metabolic pathways+ko01110//Biosynthesis of secondary metabolites+ko00260//Glycine, serine and threonin…
evm.model.Contig102.29	4.675	10.975	1.23826	1.27474e-17	2.49281e-17	XP_011081683.1|2.9e-178|zinc transporter 4, chloroplastic [Sesamum indicum]	GO:0044425//membrane part;GO:0016021//integral component of membrane;GO:0031224//intrinsic component of membrane;GO:0016020//membrane;GO:0015318//inorganic molecular entity transmembrane transporter activity;GO:0046915//transition metal ion transmembrane transporter activity;GO:0022857//transmembrane transporter activity;GO:0005385//zinc ion transmembrane transporter activity;GO:0015075//ion tran…	K14709//solute carrier family 39 (zinc transporter), member 1/2/3
evm.model.Contig102.52	4.275	10.025	1.23426	4.64031e-12	1.08696e-11	XP_022855435.1|1.9e-61|uncharacterized protein LOC111376695 [Olea europaea var. sylvestris]
evm.model.Contig102.56	3.58	32.155	2.83855	7.38494e-277	1.74004e-277	XP_022881561.1|0.0e+00|LRR receptor-like serine/threonine-protein kinase GSO1 [Olea europaea var. sylvestris]	GO:0031224//intrinsic component of membrane;GO:0044425//membrane part;GO:0016021//integral component of membrane;GO:0016020//membrane;	K13466//EIX receptor 1/2+ko04626//Plant-pathogen interaction;K13420//LRR receptor-like serine/threonine-protein kinase FLS2 [EC:2.7.11.1]+ko04016//MAPK signaling pathway - plant+ko04626//Plant-pathogen interaction;K19613//leucine-rich repeat protein SHOC2;K13466//EIX receptor 1/2+ko04626//Plant-pathogen interaction;K13420//LRR receptor-like serine/threonine-protein kinase FLS2 [EC:2.7.11.1]+ko040…
evm.model.Contig102.6	19.56	53.735	1.46384	4.08669e-140	1.91144e-140	XP_022872057.1|4.8e-293|RNA polymerase sigma factor sigC [Olea europaea var. sylvestris]		K03093//RNA polymerase sigma factor;K03093//RNA polymerase sigma factor
evm.model.Contig102.64	13.41	34.975	1.37384	3.84874e-75	3.03397e-75	XP_022881575.1|8.1e-284|protein ANTAGONIST OF LIKE HETEROCHROMATIN PROTEIN 1-like isoform X2 [Olea europaea var. sylvestris]		K04733//interleukin-1 receptor-associated kinase 4 [EC:2.7.11.1];K07936//GTP-binding nuclear protein Ran+ko03013//RNA transport+ko03008//Ribosome biogenesis in eukaryotes;K04733//interleukin-1 receptor-associated kinase 4 [EC:2.7.11.1];K07936//GTP-binding nuclear protein Ran+ko03013//RNA transport+ko03008//Ribosome biogenesis in eukaryotes
evm.model.Contig102.68	0.725	1.61	1.04503	2.19971e-08	6.04441e-08	XP_022864932.1|2.0e-28|E3 ubiquitin-protein ligase UPL3-like [Olea europaea var. sylvestris]	GO:0016740//transferase activity;GO:0004842//ubiquitin-protein transferase activity;GO:0140096//catalytic activity, acting on a protein;GO:0019787//ubiquitin-like protein transferase activity;GO:0003824//catalytic activity;	K10590//E3 ubiquitin-protein ligase TRIP12 [EC:2.3.2.26]+ko04120//Ubiquitin mediated proteolysis;K10590//E3 ubiquitin-protein ligase TRIP12 [EC:2.3.2.26]+ko04120//Ubiquitin mediated proteolysis;K10590//E3 ubiquitin-protein ligase TRIP12 [EC:2.3.2.26]+ko04120//Ubiquitin mediated proteolysis
evm.model.Contig102.76	0.355	10.04	4.96631	7.99534e-35	1.06312e-34	XP_022882273.1|8.2e-93|probable WRKY transcription factor 50 isoform X2 [Olea europaea var. sylvestris]	GO:1901576//organic substance biosynthetic process;GO:0032774//RNA biosynthetic process;GO:0097659//nucleic acid-templated transcription;GO:0043170//macromolecule metabolic process;GO:0044271//cellular nitrogen compound biosynthetic process;GO:0006725//cellular aromatic compound metabolic process;GO:1901362//organic cyclic compound biosynthetic process;GO:0019438//aromatic compound biosynthetic p…	K13424//WRKY transcription factor 33+ko04016//MAPK signaling pathway - plant+ko04626//Plant-pathogen interaction;K13424//WRKY transcription factor 33+ko04016//MAPK signaling pathway - plant+ko04626//Plant-pathogen interaction
evm.model.Contig102.77	0.17	64.005	8.51671	0	0	XP_022881631.1|2.0e-115|ankyrin repeat-containing protein BDA1-like [Olea europaea var. sylvestris]		K15503//serine/threonine-protein phosphatase 6 regulatory ankyrin repeat subunit B;K15503//serine/threonine-protein phosphatase 6 regulatory ankyrin repeat subunit B;K21435//ankyrin repeat domain-containing protein 6;K15503//serine/threonine-protein phosphatase 6 regulatory ankyrin repeat subunit B;K21435//ankyrin repeat domain-containing protein 6
evm.model.Contig102.8	21.075	53.42	1.34691	8.45411e-72	6.90595e-72	XP_022872056.1|1.5e-188|exosome component 10 [Olea europaea var. sylvestris]	GO:0016787//hydrolase activity;GO:0005488//binding;GO:0003723//RNA binding;GO:0016788//hydrolase activity, acting on ester bonds;GO:0004518//nuclease activity;GO:0097159//organic cyclic compound binding;GO:0003824//catalytic activity;GO:0003676//nucleic acid binding;GO:1901363//heterocyclic compound binding;GO:0004527//exonuclease activity;GO:0008408//3'-5' exonuclease activity;	K18740//exonuclease 3'-5' domain-containing protein 1
evm.model.Contig102.90	0.025	3.09	6.94258	1.47993e-22	2.53656e-22	XP_022862544.1|2.1e-219|ankyrin repeat-containing protein ITN1-like isoform X1 [Olea europaea var. sylvestris]		K15503//serine/threonine-protein phosphatase 6 regulatory ankyrin repeat subunit B;K21435//ankyrin repeat domain-containing protein 6
evm.model.Contig103.105	2.22	21.365	3.25775	7.27999e-32	1.02351e-31	XP_022879113.1|1.0e-66|uncharacterized protein C6C3.02c-like isoform X2 [Olea europaea var. sylvestris]		K22758//coiled-coil-helix-coiled-coil-helix domain-containing protein 2;K22759//coiled-coil-helix-coiled-coil-helix domain-containing protein 10
evm.model.Contig103.20	3.235	9.04	1.4858	1.03111e-17	2.01056e-17	XP_022855601.1|1.7e-148|protein PHLOEM PROTEIN 2-LIKE A10 [Olea europaea var. sylvestris]	GO:0044425//membrane part;GO:0016021//integral component of membrane;GO:0016020//membrane;GO:0031224//intrinsic component of membrane;
evm.model.Contig103.26	0.36	14.06	5.31915	4.0743e-29	6.0469e-29	XP_022866754.1|2.8e-70|uncharacterized protein LOC111386524 [Olea europaea var. sylvestris]
evm.model.Contig103.33	0.38	43.98	6.82468	4.53532e-77	3.51006e-77	XP_022843282.1|4.3e-65|sigma factor binding protein 1, chloroplastic-like [Olea europaea var. sylvestris]
evm.model.Contig103.36	0	3.69	6.22604	1.71344e-10	4.28827e-10	XP_022843899.1|2.0e-77|uncharacterized protein LOC111367320 isoform X2 [Olea europaea var. sylvestris]
evm.model.Contig103.63	25.58	125.86	2.29038	2.10222e-245	5.68241e-246	XP_022872546.1|3.1e-130|zinc finger protein ZAT10-like [Olea europaea var. sylvestris]	GO:0003676//nucleic acid binding;GO:0005488//binding;GO:0097159//organic cyclic compound binding;GO:1901363//heterocyclic compound binding;	K22534//PR domain zinc finger protein 5;K05747//Wiskott-Aldrich syndrome protein+ko04144//Endocytosis
evm.model.Contig103.78	8.525	27.335	1.67127	2.43306e-16	4.9342e-16	XP_022858440.1|8.8e-70|uncharacterized protein LOC111379315 [Olea europaea var. sylvestris]		K07305//peptide-methionine (R)-S-oxide reductase [EC:1.8.4.12]
evm.model.Contig104.113	9.13	33.965	1.89975	6.9571e-102	4.30536e-102	XP_022880544.1|5.4e-247|UDP-glycosyltransferase 76B1-like [Olea europaea var. sylvestris]	GO:0044464//cell part;GO:0044424//intracellular part;GO:0043229//intracellular organelle;GO:0043227//membrane-bounded organelle;GO:0005623//cell;GO:0005622//intracellular;GO:0043231//intracellular membrane-bounded organelle;GO:0043226//organelle;GO:0016757//transferase activity, transferring glycosyl groups;GO:0016758//transferase activity, transferring hexosyl groups;GO:0046527//glucosyltransfer…	K00699//glucuronosyltransferase [EC:2.4.1.17]+ko00860//Porphyrin and chlorophyll metabolism+ko00040//Pentose and glucuronate interconversions+ko01100//Metabolic pathways+ko00053//Ascorbate and aldarate metabolism+ko01110//Biosynthesis of secondary metabolites;K13493//cytokinin-N-glucosyltransferase [EC:2.4.1.-]+ko00908//Zeatin biosynthesis+ko01110//Biosynthesis of secondary metabolites
evm.model.Contig104.124	10.43	37.195	1.75503	3.58434e-219	1.08607e-219	XP_022856435.1|0.0e+00|scarecrow-like protein 30 [Olea europaea var. sylvestris]	GO:0090304//nucleic acid metabolic process;GO:0060255//regulation of macromolecule metabolic process;GO:1903506//regulation of nucleic acid-templated transcription;GO:0018130//heterocycle biosynthetic process;GO:0006351//transcription, DNA-templated;GO:0050789//regulation of biological process;GO:0034645//cellular macromolecule biosynthetic process;GO:0006139//nucleobase-containing compound metab…	K14494//DELLA protein+ko04075//Plant hormone signal transduction;K14494//DELLA protein+ko04075//Plant hormone signal transduction
evm.model.Contig104.138	0	3.525	5.9686	3.92304e-09	1.04118e-08	XP_022890939.1|2.4e-48|elicitor-responsive protein 1-like isoform X1 [Olea europaea var. sylvestris]		K01803//triosephosphate isomerase (TIM) [EC:5.3.1.1]+ko00010//Glycolysis / Gluconeogenesis+ko01230//Biosynthesis of amino acids+ko01100//Metabolic pathways+ko00051//Fructose and mannose metabolism+ko01110//Biosynthesis of secondary metabolites+ko00710//Carbon fixation in photosynthetic organisms+ko01200//Carbon metabolism+ko00562//Inositol phosphate metabolism
evm.model.Contig104.141	12.595	29.66	1.2341	1.86117e-19	3.45333e-19	XP_022890943.1|2.3e-93|uncharacterized protein LOC111406012 [Olea europaea var. sylvestris]
evm.model.Contig104.19	0	0.59	5.10126	8.04811e-06	2.56036e-05	XP_022881000.1|5.0e-250|protein trichome birefringence-like 3 [Olea europaea var. sylvestris]	GO:0044425//membrane part;GO:0016021//integral component of membrane;GO:0016020//membrane;GO:0031224//intrinsic component of membrane;
evm.model.Contig104.31	3.61	9.22	1.26053	2.42358e-12	5.61525e-12	ESR43462.1|9.6e-48|hypothetical protein CICLE_v10013682mg [Citrus clementina]	GO:0097428//protein maturation by iron-sulfur cluster transfer;GO:0043170//macromolecule metabolic process;GO:1901564//organonitrogen compound metabolic process;GO:0008152//metabolic process;GO:0051604//protein maturation;GO:0044238//primary metabolic process;GO:0019538//protein metabolic process;GO:0006807//nitrogen compound metabolic process;GO:0010467//gene expression;GO:0071704//organic subst…	K22063//iron-sulfur cluster assembly 1;K22063//iron-sulfur cluster assembly 1;K22063//iron-sulfur cluster assembly 1;K22063//iron-sulfur cluster assembly 1;K22063//iron-sulfur cluster assembly 1
evm.model.Contig104.43	4.405	16.53	1.91117	2.08173e-137	9.90534e-138	XP_022890929.1|0.0e+00|homeobox-DDT domain protein RLT3-like [Olea europaea var. sylvestris]
evm.model.Contig104.47	1.97	5.485	1.45933	0.000198105	0.000699039	XP_022880844.1|1.1e-59|AT-hook motif nuclear-localized protein 19-like [Olea europaea var. sylvestris]	GO:0044424//intracellular part;GO:0043227//membrane-bounded organelle;GO:0043229//intracellular organelle;GO:0044464//cell part;GO:0005623//cell;GO:0043231//intracellular membrane-bounded organelle;GO:0043226//organelle;GO:0005634//nucleus;GO:0005622//intracellular;GO:0003690//double-stranded DNA binding;GO:0005488//binding;GO:0003680//AT DNA binding;GO:0140110//transcription regulator activity;G…
evm.model.Contig104.50	6.695	29.74	2.14293	1.37532e-181	4.99317e-182	XP_022890928.1|5.8e-288|inositol phosphorylceramide glucuronosyltransferase 1-like isoform X3 [Olea europaea var. sylvestris]	GO:0016020//membrane;GO:0016021//integral component of membrane;GO:0044425//membrane part;GO:0031224//intrinsic component of membrane;GO:0016740//transferase activity;GO:0016757//transferase activity, transferring glycosyl groups;GO:0003824//catalytic activity;	K22809//inositol phosphorylceramide glucuronosyltransferase 1 [EC:2.4.1.-];K22809//inositol phosphorylceramide glucuronosyltransferase 1 [EC:2.4.1.-]
evm.model.Contig104.66	1.735	40.81	4.56204	1.21609e-287	2.74084e-288	XP_022862537.1|5.2e-261|heat shock cognate 70 kDa protein-like [Olea europaea var. sylvestris]	GO:0008144//drug binding;GO:0030554//adenyl nucleotide binding;GO:1901363//heterocyclic compound binding;GO:0043167//ion binding;GO:0043168//anion binding;GO:0035639//purine ribonucleoside triphosphate binding;GO:1901265//nucleoside phosphate binding;GO:0005488//binding;GO:0036094//small molecule binding;GO:0032559//adenyl ribonucleotide binding;GO:0000166//nucleotide binding;GO:0097159//organic …	K03283//heat shock 70kDa protein 1/2/6/8+ko03040//Spliceosome+ko04144//Endocytosis+ko04141//Protein processing in endoplasmic reticulum
evm.model.Contig104.88	1.005	69.79	6.12323	0	0	XP_022863920.1|2.0e-192|protein phosphatase 2C 37-like [Olea europaea var. sylvestris]	GO:0005488//binding;GO:0043169//cation binding;GO:0003824//catalytic activity;GO:0004721//phosphoprotein phosphatase activity;GO:0016791//phosphatase activity;GO:0140096//catalytic activity, acting on a protein;GO:0042578//phosphoric ester hydrolase activity;GO:0016788//hydrolase activity, acting on ester bonds;GO:0046872//metal ion binding;GO:0004722//protein serine/threonine phosphatase activit…	K14497//protein phosphatase 2C [EC:3.1.3.16]+ko04016//MAPK signaling pathway - plant+ko04075//Plant hormone signal transduction
evm.model.Contig105.109	0.105	264.545	11.2345	2.56802e-211	8.04378e-212	XP_022863074.1|8.1e-49|uncharacterized protein LOC111383222 [Olea europaea var. sylvestris]
evm.model.Contig105.110	0.055	128.225	11.2113	6.96036e-104	4.2308e-104	XP_022863074.1|4.8e-49|uncharacterized protein LOC111383222 [Olea europaea var. sylvestris]
evm.model.Contig105.113	0.17	85.01	9.02083	1.44595e-95	9.42543e-96	XP_022863074.1|3.8e-54|uncharacterized protein LOC111383222 [Olea europaea var. sylvestris]
evm.model.Contig105.118	25.535	87.03	1.70635	2.87844e-202	9.41673e-203	XP_022886964.1|1.9e-97|abscisic acid receptor PYL8-like [Olea europaea var. sylvestris]		K14496//abscisic acid receptor PYR/PYL family+ko04016//MAPK signaling pathway - plant+ko04075//Plant hormone signal transduction;K14496//abscisic acid receptor PYR/PYL family+ko04016//MAPK signaling pathway - plant+ko04075//Plant hormone signal transduction
evm.model.Contig105.121	20.97	109.305	2.37287	0	0	XP_022844606.1|1.3e-184|probable WRKY transcription factor 53 [Olea europaea var. sylvestris]	GO:0044464//cell part;GO:0005623//cell;GO:0005622//intracellular;GO:0043229//intracellular organelle;GO:0043231//intracellular membrane-bounded organelle;GO:0043227//membrane-bounded organelle;GO:0043226//organelle;GO:0044424//intracellular part;GO:0005634//nucleus;GO:0003700//DNA binding transcription factor activity;GO:0003676//nucleic acid binding;GO:0003677//DNA binding;GO:0043565//sequence-s…	K13459//disease resistance protein RPS2+ko04626//Plant-pathogen interaction;K16225//probable WRKY transcription factor 52+ko04626//Plant-pathogen interaction
evm.model.Contig105.126	6.5	15.59	1.25126	6.73094e-39	8.36909e-39	XP_011084503.1|5.7e-88|rust resistance kinase Lr10-like [Sesamum indicum]	GO:0044425//membrane part;GO:0016020//membrane;GO:0016021//integral component of membrane;GO:0031224//intrinsic component of membrane;GO:1901265//nucleoside phosphate binding;GO:0016301//kinase activity;GO:0001871//pattern binding;GO:0016740//transferase activity;GO:0032559//adenyl ribonucleotide binding;GO:0016773//phosphotransferase activity, alcohol group as acceptor;GO:0140096//catalytic acti…	K04733//interleukin-1 receptor-associated kinase 4 [EC:2.7.11.1];K04733//interleukin-1 receptor-associated kinase 4 [EC:2.7.11.1]
evm.model.Contig105.128	22.97	62.41	1.45537	9.85787e-106	5.89563e-106	XP_022844098.1|2.8e-201|rust resistance kinase Lr10-like isoform X1 [Olea europaea var. sylvestris]	GO:0016020//membrane;GO:0031224//intrinsic component of membrane;GO:0044425//membrane part;GO:0016021//integral component of membrane;GO:0001871//pattern binding;GO:0032559//adenyl ribonucleotide binding;GO:0016788//hydrolase activity, acting on ester bonds;GO:0035639//purine ribonucleoside triphosphate binding;GO:0043168//anion binding;GO:0043167//ion binding;GO:0042578//phosphoric ester hydrola…	K04733//interleukin-1 receptor-associated kinase 4 [EC:2.7.11.1];K04733//interleukin-1 receptor-associated kinase 4 [EC:2.7.11.1]
evm.model.Contig105.136	0.315	1.125	1.84219	1.6289e-07	4.67878e-07	XP_020546906.1|8.2e-147|interaptin-like [Sesamum indicum]	GO:0003779//actin binding;GO:0005515//protein binding;GO:0005488//binding;GO:0008092//cytoskeletal protein binding;	K20478//golgin subfamily B member 1
evm.model.Contig105.26	10.17	22.13	1.11913	6.12702e-20	1.12383e-19	XP_022873809.1|2.9e-153|E3 ubiquitin-protein ligase SHPRH [Olea europaea var. sylvestris]	GO:0030554//adenyl nucleotide binding;GO:0008144//drug binding;GO:0017111//nucleoside-triphosphatase activity;GO:1901363//heterocyclic compound binding;GO:0043169//cation binding;GO:0032559//adenyl ribonucleotide binding;GO:0032555//purine ribonucleotide binding;GO:0005488//binding;GO:0004386//helicase activity;GO:0036094//small molecule binding;GO:0097367//carbohydrate derivative binding;GO:0046…	K15710//E3 ubiquitin-protein ligase SHPRH [EC:3.6.4.- 2.3.2.27]
evm.model.Contig105.27	1.39	3.71	1.42365	1.73562e-21	3.05675e-21	XP_022873809.1|0.0e+00|E3 ubiquitin-protein ligase SHPRH [Olea europaea var. sylvestris]	GO:0003824//catalytic activity;GO:0036094//small molecule binding;GO:0043169//cation binding;GO:0000166//nucleotide binding;GO:0017076//purine nucleotide binding;GO:0004386//helicase activity;GO:1901265//nucleoside phosphate binding;GO:0016462//pyrophosphatase activity;GO:0016818//hydrolase activity, acting on acid anhydrides, in phosphorus-containing anhydrides;GO:0043167//ion binding;GO:0008144…	K15710//E3 ubiquitin-protein ligase SHPRH [EC:3.6.4.- 2.3.2.27]
evm.model.Contig105.31	4.3	12.765	1.57069	2.1792e-102	1.34192e-102	XP_022873826.1|0.0e+00|uncharacterized protein LOC111392676 [Olea europaea var. sylvestris]	GO:0048583//regulation of response to stimulus;GO:0065007//biological regulation;GO:0043900//regulation of multi-organism process;GO:0002831//regulation of response to biotic stimulus;GO:0031347//regulation of defense response;GO:0032101//regulation of response to external stimulus;GO:0080134//regulation of response to stress;GO:1900150//regulation of defense response to fungus;GO:0050789//regula…	K04733//interleukin-1 receptor-associated kinase 4 [EC:2.7.11.1]
evm.model.Contig105.40	7.5	21.1	1.49721	1.23445e-51	1.27134e-51	XP_022890983.1|9.0e-190|autophagy-related protein 18c-like [Olea europaea var. sylvestris]		K22991//WD repeat-containing protein 45;K22991//WD repeat-containing protein 45
evm.model.Contig105.52	0	0.75	5.09676	8.29175e-06	2.64079e-05	XP_009612619.1|3.1e-138|PREDICTED: uncharacterized protein At1g28695-like [Nicotiana tomentosiformis]	GO:0016043//cellular component organization;GO:0071555//cell wall organization;GO:0045229//external encapsulating structure organization;GO:0071554//cell wall organization or biogenesis;GO:0071840//cellular component organization or biogenesis;GO:0009987//cellular process;GO:0043231//intracellular membrane-bounded organelle;GO:0031090//organelle membrane;GO:0043229//intracellular organelle;GO:000…	K20892//beta-arabinofuranosyltransferase [EC:2.4.2.-]
evm.model.Contig105.65	43.525	87.75	1.0111	3.64064e-99	2.2975e-99	XP_022854348.1|2.6e-246|protein GPR107-like [Olea europaea var. sylvestris]	GO:0016021//integral component of membrane;GO:0016020//membrane;GO:0044425//membrane part;GO:0031224//intrinsic component of membrane;	K22985//G protein-coupled receptor 107
evm.model.Contig105.7	3.085	50.745	4.03451	5.66149e-125	2.95339e-125	XP_012858840.1|1.3e-43|PREDICTED: uncharacterized protein LOC105977981 [Erythranthe guttata]
evm.model.Contig106.107	37.76	84.74	1.16861	1.35884e-50	1.41834e-50	XP_022878453.1|4.4e-103|high-affinity nitrate transporter 3.2-like [Olea europaea var. sylvestris]
evm.model.Contig106.11	1.565	16.955	3.44071	1.3689e-206	4.38418e-207	XP_022886358.1|0.0e+00|chaperone protein ClpB1-like isoform X1 [Olea europaea var. sylvestris]		K03695//ATP-dependent Clp protease ATP-binding subunit ClpB
evm.model.Contig106.110	9.335	48.39	2.37272	2.20106e-220	6.6256e-221	XP_022878454.1|6.5e-273|cytochrome P450 71A6-like [Olea europaea var. sylvestris]		K00512//steroid 17alpha-monooxygenase / 17alpha-hydroxyprogesterone deacetylase [EC:1.14.14.19 1.14.14.32]+ko01100//Metabolic pathways;K00512//steroid 17alpha-monooxygenase / 17alpha-hydroxyprogesterone deacetylase [EC:1.14.14.19 1.14.14.32]+ko01100//Metabolic pathways
evm.model.Contig106.111	0.335	6.335	4.23972	5.69197e-73	4.59222e-73	XP_022865133.1|0.0e+00|probable galactinol--sucrose galactosyltransferase 2 [Olea europaea var. sylvestris]	GO:0016740//transferase activity;GO:0047274//galactinol-sucrose galactosyltransferase activity;GO:0008378//galactosyltransferase activity;GO:0003824//catalytic activity;GO:0016757//transferase activity, transferring glycosyl groups;GO:0016758//transferase activity, transferring hexosyl groups;	K06617//raffinose synthase [EC:2.4.1.82]+ko00052//Galactose metabolism
evm.model.Contig106.118	3.985	8.315	1.06606	6.55546e-10	1.68112e-09	XP_022878444.1|1.5e-183|BTB/POZ and TAZ domain-containing protein 1-like [Olea europaea var. sylvestris]	GO:0031323//regulation of cellular metabolic process;GO:0050794//regulation of cellular process;GO:0010468//regulation of gene expression;GO:0051252//regulation of RNA metabolic process;GO:2001141//regulation of RNA biosynthetic process;GO:0051171//regulation of nitrogen compound metabolic process;GO:0065007//biological regulation;GO:2000112//regulation of cellular macromolecule biosynthetic proc…	K10523//speckle-type POZ protein;K02987//small subunit ribosomal protein S4e+ko03010//Ribosome
evm.model.Contig106.125	0	3.59	7.11913	3.9628e-17	7.84511e-17	XP_022878438.1|1.9e-144|uncharacterized protein LOC111396282 [Olea europaea var. sylvestris]
evm.model.Contig106.126	1.105	2.715	1.30733	9.71549e-07	2.91281e-06	XP_022878437.1|2.2e-243|malate synthase, glyoxysomal isoform X3 [Olea europaea var. sylvestris]	GO:0046487//glyoxylate metabolic process;GO:0072350//tricarboxylic acid metabolic process;GO:0009987//cellular process;GO:0006099//tricarboxylic acid cycle;GO:0006082//organic acid metabolic process;GO:0009060//aerobic respiration;GO:0044281//small molecule metabolic process;GO:0071704//organic substance metabolic process;GO:0019752//carboxylic acid metabolic process;GO:0055114//oxidation-reducti…	K01638//malate synthase [EC:2.3.3.9]+ko01100//Metabolic pathways+ko01110//Biosynthesis of secondary metabolites+ko00620//Pyruvate metabolism+ko01200//Carbon metabolism+ko00630//Glyoxylate and dicarboxylate metabolism
evm.model.Contig106.127	5.49	16.87	1.62419	6.59971e-40	8.0746e-40	XP_022878431.1|6.5e-226|uncharacterized protein LOC111396277 isoform X1 [Olea europaea var. sylvestris]	GO:0016021//integral component of membrane;GO:0044425//membrane part;GO:0031224//intrinsic component of membrane;GO:0016020//membrane;
evm.model.Contig106.132	17.605	35.92	1.02932	1.44207e-65	1.26282e-65	XP_022852300.1|0.0e+00|exocyst complex component EXO70B1-like [Olea europaea var. sylvestris]	GO:0045184//establishment of protein localization;GO:0016192//vesicle-mediated transport;GO:0015031//protein transport;GO:0032940//secretion by cell;GO:0006810//transport;GO:0051179//localization;GO:0071702//organic substance transport;GO:0051234//establishment of localization;GO:0015833//peptide transport;GO:0006887//exocytosis;GO:0008104//protein localization;GO:0033036//macromolecule localizat…	K07195//exocyst complex component 7
evm.model.Contig106.133	6.615	15.935	1.27821	5.80218e-27	8.98992e-27	XP_022852298.1|9.1e-236|SNF1-related protein kinase regulatory subunit gamma-1-like [Olea europaea var. sylvestris]	GO:0030312//external encapsulating structure;GO:0044464//cell part;GO:0005618//cell wall;GO:0071944//cell periphery;GO:0005623//cell;GO:0009505//plant-type cell wall;GO:0019887//protein kinase regulator activity;GO:0016301//kinase activity;GO:0016740//transferase activity;GO:0019207//kinase regulator activity;GO:0030234//enzyme regulator activity;GO:0016772//transferase activity, transferring pho…	K07200//5'-AMP-activated protein kinase, regulatory gamma subunit
evm.model.Contig106.137	1.3	4.17	1.66708	2.81945e-10	7.11793e-10	XP_022852292.1|7.2e-197|uncharacterized protein LOC111373930 isoform X1 [Olea europaea var. sylvestris]	GO:0003824//catalytic activity;	K15631//molybdenum cofactor sulfurtransferase [EC:2.8.1.9]+ko00790//Folate biosynthesis
evm.model.Contig106.159	14.675	62.385	2.04657	0	0	XP_022872199.1|0.0e+00|topless-related protein 4-like isoform X2 [Olea europaea var. sylvestris]	GO:0010468//regulation of gene expression;GO:2001141//regulation of RNA biosynthetic process;GO:0009889//regulation of biosynthetic process;GO:0019222//regulation of metabolic process;GO:0051171//regulation of nitrogen compound metabolic process;GO:0031323//regulation of cellular metabolic process;GO:0006355//regulation of transcription, DNA-templated;GO:2000112//regulation of cellular macromolec…	K14963//COMPASS component SWD3;K22382//WD repeat-containing protein 26;K14963//COMPASS component SWD3;K22382//WD repeat-containing protein 26
evm.model.Contig106.162	0	1.96	6.58861	8.72269e-13	1.99073e-12	XP_022857301.1|1.9e-197|mitochondrial phosphate carrier protein 3, mitochondrial-like [Olea europaea var. sylvestris]	GO:0044425//membrane part;GO:0016020//membrane;GO:0016021//integral component of membrane;GO:0031224//intrinsic component of membrane;GO:0005215//transporter activity;GO:0022857//transmembrane transporter activity;	K15102//solute carrier family 25 (mitochondrial phosphate transporter), member 3
evm.model.Contig106.181	10.06	25.88	1.37153	8.65066e-63	7.80144e-63	XP_027177257.1|3.6e-244|bifunctional purple acid phosphatase 26 [Coffea eugenioides]	GO:0016788//hydrolase activity, acting on ester bonds;GO:0016787//hydrolase activity;GO:0046872//metal ion binding;GO:0042578//phosphoric ester hydrolase activity;GO:0005488//binding;GO:0043167//ion binding;GO:0016791//phosphatase activity;GO:0003993//acid phosphatase activity;GO:0043169//cation binding;GO:0003824//catalytic activity;	K22390//acid phosphatase type 7;K22390//acid phosphatase type 7
evm.model.Contig106.189	47.375	141.675	1.58333	2.00533e-239	5.54309e-240	XP_022886213.1|1.3e-181|codeine O-demethylase-like [Olea europaea var. sylvestris]	GO:0043167//ion binding;GO:0043169//cation binding;GO:0005488//binding;GO:0046872//metal ion binding;GO:0003824//catalytic activity;GO:0016491//oxidoreductase activity;	K05658//ATP-binding cassette, subfamily B (MDR/TAP), member 1 [EC:7.6.2.2]+ko02010//ABC transporters;K05278//flavonol synthase [EC:1.14.20.6]+ko01100//Metabolic pathways+ko01110//Biosynthesis of secondary metabolites+ko00941//Flavonoid biosynthesis;K05277//anthocyanidin synthase [EC:1.14.20.4]+ko01100//Metabolic pathways+ko01110//Biosynthesis of secondary metabolites+ko00941//Flavonoid biosynthes…
evm.model.Contig106.191	3.715	40.91	3.46128	9.81551e-173	3.74505e-173	XP_022886213.1|2.2e-179|codeine O-demethylase-like [Olea europaea var. sylvestris]	GO:0016491//oxidoreductase activity;GO:0043169//cation binding;GO:0046872//metal ion binding;GO:0043167//ion binding;GO:0005488//binding;GO:0003824//catalytic activity;	K05278//flavonol synthase [EC:1.14.20.6]+ko01100//Metabolic pathways+ko01110//Biosynthesis of secondary metabolites+ko00941//Flavonoid biosynthesis;K05658//ATP-binding cassette, subfamily B (MDR/TAP), member 1 [EC:7.6.2.2]+ko02010//ABC transporters
evm.model.Contig106.195	3.14	7.665	1.28728	2.89624e-24	4.78216e-24	XP_022870206.1|0.0e+00|protein PHOX1-like [Olea europaea var. sylvestris]		K17768//mitochondrial import receptor subunit TOM70;K21991//protein unc-45
evm.model.Contig106.200	20.335	218.81	3.42004	0	0	XP_022870182.1|2.2e-90|probable E3 ubiquitin-protein ligase RHY1A [Olea europaea var. sylvestris]		K22378//E3 ubiquitin-protein ligase RNF181 [EC:2.3.2.27];K11982//E3 ubiquitin-protein ligase RNF115/126 [EC:2.3.2.27]
evm.model.Contig106.204	1.155	22.82	4.29503	1.95292e-117	1.07039e-117	XP_022867085.1|2.7e-100|NAC domain-containing protein 92-like isoform X1 [Olea europaea var. sylvestris]	GO:2001141//regulation of RNA biosynthetic process;GO:0065007//biological regulation;GO:0031323//regulation of cellular metabolic process;GO:0019219//regulation of nucleobase-containing compound metabolic process;GO:0050794//regulation of cellular process;GO:0051252//regulation of RNA metabolic process;GO:0019222//regulation of metabolic process;GO:1903506//regulation of nucleic acid-templated tr…	K00521//ferric-chelate reductase [EC:1.16.1.7];K13126//polyadenylate-binding protein+ko03015//mRNA surveillance pathway+ko03018//RNA degradation+ko03013//RNA transport;K12862//pleiotropic regulator 1+ko03040//Spliceosome;K05941//glutathione gamma-glutamylcysteinyltransferase [EC:2.3.2.15]
evm.model.Contig106.23	6.195	14.11	1.15488	6.73812e-38	8.51988e-38	XP_022860789.1|1.1e-140|uncharacterized protein LOC111381262 isoform X1 [Olea europaea var. sylvestris]
evm.model.Contig106.237	72.135	313.785	2.11398	0	0	XP_022845483.1|9.5e-252|spermidine hydroxycinnamoyl transferase-like [Olea europaea var. sylvestris]	GO:0016740//transferase activity;GO:0016746//transferase activity, transferring acyl groups;GO:0003824//catalytic activity;GO:0016747//transferase activity, transferring acyl groups other than amino-acyl groups;	K13065//shikimate O-hydroxycinnamoyltransferase [EC:2.3.1.133]+ko01100//Metabolic pathways+ko01110//Biosynthesis of secondary metabolites+ko00940//Phenylpropanoid biosynthesis+ko00941//Flavonoid biosynthesis+ko00945//Stilbenoid, diarylheptanoid and gingerol biosynthesis
evm.model.Contig106.5	4.535	46.195	3.351	4.62693e-219	1.40269e-219	XP_012831387.1|1.5e-165|PREDICTED: G-type lectin S-receptor-like serine/threonine-protein kinase B120 [Erythranthe guttata]	GO:0071704//organic substance metabolic process;GO:0044260//cellular macromolecule metabolic process;GO:0008152//metabolic process;GO:0006793//phosphorus metabolic process;GO:0019538//protein metabolic process;GO:0036211//protein modification process;GO:0043170//macromolecule metabolic process;GO:1901564//organonitrogen compound metabolic process;GO:0009987//cellular process;GO:0043412//macromole…	K04733//interleukin-1 receptor-associated kinase 4 [EC:2.7.11.1]
evm.model.Contig106.51	5.985	15.015	1.45998	3.53458e-24	5.84484e-24	XP_022848987.1|6.3e-110|transcription factor bHLH47-like [Olea europaea var. sylvestris]	GO:0005515//protein binding;GO:0005488//binding;GO:0046983//protein dimerization activity;
evm.model.Contig106.61	12.175	29.895	1.29697	3.72961e-43	4.33286e-43	XP_022852524.1|3.3e-125|uncharacterized protein LOC111374130 [Olea europaea var. sylvestris]		K12849//pre-mRNA-splicing factor 38A+ko03040//Spliceosome;K12842//U2-associated protein SR140+ko03040//Spliceosome
evm.model.Contig106.63	18.68	58.575	1.62469	1.19562e-122	6.33759e-123	XP_022852542.1|3.1e-192|uncharacterized protein LOC111374143 [Olea europaea var. sylvestris]		K10643//CCR4-NOT transcription complex subunit 4 [EC:2.3.2.27]+ko03018//RNA degradation;K10643//CCR4-NOT transcription complex subunit 4 [EC:2.3.2.27]+ko03018//RNA degradation
evm.model.Contig106.66	24.99	129.73	2.3714	4.28119e-298	9.28269e-299	XP_022852538.1|1.9e-133|transcription factor MYB1R1-like [Olea europaea var. sylvestris]	GO:0043231//intracellular membrane-bounded organelle;GO:0043226//organelle;GO:0043229//intracellular organelle;GO:0005622//intracellular;GO:0043227//membrane-bounded organelle;GO:0044424//intracellular part;GO:0005623//cell;GO:0005634//nucleus;GO:0044464//cell part;GO:0003676//nucleic acid binding;GO:0003677//DNA binding;GO:0097159//organic cyclic compound binding;GO:1901363//heterocyclic compoun…	K08869//aarF domain-containing kinase;K17613//calcineurin-binding protein cabin-1
evm.model.Contig106.76	2.92	7.33	1.32558	1.59154e-15	3.30882e-15	XP_022865125.1|1.8e-116|putative exosome complex component rrp40 isoform X1 [Olea europaea var. sylvestris]	GO:0016071//mRNA metabolic process;GO:0009987//cellular process;GO:0016072//rRNA metabolic process;GO:0009056//catabolic process;GO:0031125//rRNA 3'-end processing;GO:0043628//ncRNA 3'-end processing;GO:0044238//primary metabolic process;GO:0022613//ribonucleoprotein complex biogenesis;GO:0010605//negative regulation of macromolecule metabolic process;GO:0031126//snoRNA 3'-end processing;GO:00344…	K03681//exosome complex component RRP40+ko03018//RNA degradation;K03681//exosome complex component RRP40+ko03018//RNA degradation;K03681//exosome complex component RRP40+ko03018//RNA degradation
evm.model.Contig106.79	11.27	38.71	1.79836	1.70806e-205	5.50434e-206	XP_022865159.1|0.0e+00|pantothenate kinase 2-like [Olea europaea var. sylvestris]	GO:0051186//cofactor metabolic process;GO:0006164//purine nucleotide biosynthetic process;GO:0046390//ribose phosphate biosynthetic process;GO:1901135//carbohydrate derivative metabolic process;GO:0009260//ribonucleotide biosynthetic process;GO:0033866//nucleoside bisphosphate biosynthetic process;GO:1901362//organic cyclic compound biosynthetic process;GO:1901566//organonitrogen compound biosynt…	K09680//type II pantothenate kinase [EC:2.7.1.33]+ko00770//Pantothenate and CoA biosynthesis+ko01100//Metabolic pathways;K09680//type II pantothenate kinase [EC:2.7.1.33]+ko00770//Pantothenate and CoA biosynthesis+ko01100//Metabolic pathways
evm.model.Contig106.85	3.56	11.35	1.67377	5.4322e-48	5.87755e-48	XP_022886144.1|3.4e-296|uncharacterized protein LOC111402214 [Olea europaea var. sylvestris]	GO:0016021//integral component of membrane;GO:0031224//intrinsic component of membrane;GO:0044425//membrane part;GO:0016020//membrane;
evm.model.Contig106.99	20.48	43.735	1.02847	2.88738e-113	1.63065e-113	XP_022886158.1|0.0e+00|protein NBR1 homolog [Olea europaea var. sylvestris]	GO:0009056//catabolic process;GO:0006914//autophagy;GO:0008152//metabolic process;GO:0016236//macroautophagy;GO:0009987//cellular process;GO:0044237//cellular metabolic process;GO:0061919//process utilizing autophagic mechanism;GO:0044248//cellular catabolic process;GO:0008270//zinc ion binding;GO:0046914//transition metal ion binding;GO:0032182//ubiquitin-like protein binding;GO:0005515//protein…	K17987//next to BRCA1 gene 1 protein;K17987//next to BRCA1 gene 1 protein
evm.model.Contig107.112	99.725	217.925	1.13286	6.1078e-108	3.59032e-108	XP_022860127.1|1.7e-93|uncharacterized protein LOC111380726 [Olea europaea var. sylvestris]	GO:0031224//intrinsic component of membrane;GO:0016020//membrane;GO:0016021//integral component of membrane;GO:0044425//membrane part;
evm.model.Contig107.114	0.135	2.375	4.19362	3.26152e-36	4.24606e-36	KZV29567.1|0.0e+00|plasma membrane ATPase 4 [Dorcoceras hygrometricum]	GO:0140115//export across plasma membrane;GO:0051179//localization;GO:0098662//inorganic cation transmembrane transport;GO:0015672//monovalent inorganic cation transport;GO:1902600//hydrogen ion transmembrane transport;GO:0051234//establishment of localization;GO:0055085//transmembrane transport;GO:0006812//cation transport;GO:0006811//ion transport;GO:0120029//hydrogen ion export across plasma m…	K01535//H+-transporting ATPase [EC:7.1.2.1]+ko00190//Oxidative phosphorylation
evm.model.Contig107.140	22.135	46.7	1.07893	5.27476e-75	4.16535e-75	XP_022870528.1|6.9e-305|probable zinc metalloprotease EGY1, chloroplastic [Olea europaea var. sylvestris]	GO:0016021//integral component of membrane;GO:0031224//intrinsic component of membrane;GO:0044425//membrane part;GO:0016020//membrane;	K00275//pyridoxamine 5'-phosphate oxidase [EC:1.4.3.5]+ko00750//Vitamin B6 metabolism+ko01100//Metabolic pathways
evm.model.Contig107.19	1.045	9.03	3.24761	8.64474e-58	8.23465e-58	XP_022882777.1|5.3e-135|gamma-glutamyl peptidase 3-like isoform X1 [Olea europaea var. sylvestris]	GO:1901605//alpha-amino acid metabolic process;GO:0009987//cellular process;GO:0071704//organic substance metabolic process;GO:0006520//cellular amino acid metabolic process;GO:0008152//metabolic process;GO:0006082//organic acid metabolic process;GO:0019752//carboxylic acid metabolic process;GO:0006807//nitrogen compound metabolic process;GO:0044237//cellular metabolic process;GO:0043436//oxoacid…	K22314//glucosinolate gamma-glutamyl hydrolase [EC:3.4.19.16];K22314//glucosinolate gamma-glutamyl hydrolase [EC:3.4.19.16]
evm.model.Contig107.24	1.55	4.545	1.55769	2.87197e-05	9.51351e-05	XP_022863127.1|4.7e-90|transmembrane protein 208-like isoform X2 [Olea europaea var. sylvestris]	GO:0016021//integral component of membrane;GO:0031224//intrinsic component of membrane;GO:0016020//membrane;GO:0044425//membrane part;
evm.model.Contig107.30	34.205	154.18	2.16534	4.83977e-302	1.02867e-302	XP_022863130.1|3.8e-147|tetraspanin-8-like [Olea europaea var. sylvestris]		K17356//tetraspanin-13/31;K17345//tetraspanin-5;K01184//polygalacturonase [EC:3.2.1.15]+ko00040//Pentose and glucuronate interconversions+ko01100//Metabolic pathways
evm.model.Contig107.39	10.205	249.74	4.66276	0	0	XP_011069851.1|5.4e-51|EG45-like domain containing protein [Sesamum indicum]		K20628//expansin;K14771//U3 small nucleolar RNA-associated protein 19;K20628//expansin;K14771//U3 small nucleolar RNA-associated protein 19;K20628//expansin;K14771//U3 small nucleolar RNA-associated protein 19
evm.model.Contig107.48	7.3	19.295	1.40181	3.9524e-92	2.66092e-92	XP_022888087.1|0.0e+00|protein SUPPRESSOR OF MAX2 1 [Olea europaea var. sylvestris]	GO:0071704//organic substance metabolic process;GO:0044238//primary metabolic process;GO:0019538//protein metabolic process;GO:0006807//nitrogen compound metabolic process;GO:0043170//macromolecule metabolic process;GO:1901564//organonitrogen compound metabolic process;GO:0008152//metabolic process;	K03695//ATP-dependent Clp protease ATP-binding subunit ClpB
evm.model.Contig107.49	1.51	7.185	2.25395	1.66072e-30	2.39904e-30	XP_022859681.1|4.9e-270|diacylglycerol kinase 4-like isoform X1 [Olea europaea var. sylvestris]		K00901//diacylglycerol kinase (ATP) [EC:2.7.1.107]+ko01100//Metabolic pathways+ko01110//Biosynthesis of secondary metabolites+ko04070//Phosphatidylinositol signaling system+ko00564//Glycerophospholipid metabolism+ko00561//Glycerolipid metabolism
evm.model.Contig107.50	0	0.305	5.1594	5.41402e-06	1.70417e-05	XP_022888518.1|0.0e+00|glutamate receptor 2.3-like [Olea europaea var. sylvestris]		K05387//glutamate receptor, ionotropic, plant
evm.model.Contig107.61	4.06	42.61	3.35243	2.84207e-25	4.57592e-25	PIN06325.1|5.5e-06|Copper chaperone [Handroanthus impetiginosus]
evm.model.Contig107.63	7.65	30.705	1.90098	1.64712e-108	9.64698e-109	XP_022858052.1|2.4e-247|uncharacterized protein LOC111378976 isoform X4 [Olea europaea var. sylvestris]		K01805//xylose isomerase [EC:5.3.1.5]+ko00040//Pentose and glucuronate interconversions+ko01100//Metabolic pathways+ko00051//Fructose and mannose metabolism;K01805//xylose isomerase [EC:5.3.1.5]+ko00040//Pentose and glucuronate interconversions+ko01100//Metabolic pathways+ko00051//Fructose and mannose metabolism
evm.model.Contig107.67	0	0.73	5.63032	1.24021e-07	3.54203e-07	XP_011069889.1|2.0e-239|protein DETOXIFICATION 16 [Sesamum indicum]	GO:0016021//integral component of membrane;GO:0031224//intrinsic component of membrane;GO:0044425//membrane part;GO:0016020//membrane;GO:0015297//antiporter activity;GO:0015291//secondary active transmembrane transporter activity;GO:0022857//transmembrane transporter activity;GO:0022804//active transmembrane transporter activity;GO:0015238//drug transmembrane transporter activity;GO:0005215//tran…	K03327//multidrug resistance protein, MATE family
evm.model.Contig107.72	17.59	64.36	1.87195	7.3572e-43	8.57755e-43	OIS96657.1|2.7e-21|hypothetical protein A4A49_35372 [Nicotiana attenuata]
evm.model.Contig108.108	0.6	1.715	1.5118	0.000289262	0.00103431	XP_022893687.1|1.2e-168|NAC domain-containing protein 71-like isoform X1 [Olea europaea var. sylvestris]	GO:0010556//regulation of macromolecule biosynthetic process;GO:0080090//regulation of primary metabolic process;GO:0019219//regulation of nucleobase-containing compound metabolic process;GO:0060255//regulation of macromolecule metabolic process;GO:0010468//regulation of gene expression;GO:0065007//biological regulation;GO:0031326//regulation of cellular biosynthetic process;GO:0019222//regulatio…	K00521//ferric-chelate reductase [EC:1.16.1.7];K13126//polyadenylate-binding protein+ko03015//mRNA surveillance pathway+ko03018//RNA degradation+ko03013//RNA transport;K03094//S-phase kinase-associated protein 1+ko04141//Protein processing in endoplasmic reticulum+ko04120//Ubiquitin mediated proteolysis;K12862//pleiotropic regulator 1+ko03040//Spliceosome
evm.model.Contig108.120	0.39	3.15	3.01498	4.49848e-08	1.25562e-07	XP_022875050.1|4.5e-89|uncharacterized protein LOC111393639 [Olea europaea var. sylvestris]
evm.model.Contig108.121	1.34	3.5	1.39289	1.39762e-14	3.0037e-14	XP_022865605.1|0.0e+00|probable disease resistance protein At5g66900 [Olea europaea var. sylvestris]		K19613//leucine-rich repeat protein SHOC2;K13415//protein brassinosteroid insensitive 1 [EC:2.7.10.1 2.7.11.1]+ko04075//Plant hormone signal transduction;K04733//interleukin-1 receptor-associated kinase 4 [EC:2.7.11.1]
evm.model.Contig108.131	7.95	44.085	2.47	4.73471e-86	3.37643e-86	XP_022865613.1|1.1e-118|EEF1A lysine methyltransferase 3-like [Olea europaea var. sylvestris]		K21804//protein N-lysine methyltransferase METTL21A [EC:2.1.1.-]
evm.model.Contig108.136	1.235	56.675	5.52911	1.79893e-232	5.13473e-233	XP_022856639.1|7.7e-127|probable BOI-related E3 ubiquitin-protein ligase 3 [Olea europaea var. sylvestris]	GO:0003824//catalytic activity;GO:0016874//ligase activity;	K19042//E3 ubiquitin-protein ligase BOI and related proteins [EC:2.3.2.27]
evm.model.Contig108.147	2.28	89.12	5.39632	0	0	XP_022856640.1|4.1e-195|probable serine/threonine-protein kinase PBL19 isoform X1 [Olea europaea var. sylvestris]	GO:0036211//protein modification process;GO:0006807//nitrogen compound metabolic process;GO:0007165//signal transduction;GO:0019538//protein metabolic process;GO:0009987//cellular process;GO:0051716//cellular response to stimulus;GO:0007154//cell communication;GO:0044238//primary metabolic process;GO:0006468//protein phosphorylation;GO:0006464//cellular protein modification process;GO:0050794//re…	K00924//kinase [EC:2.7.1.-];K00924//kinase [EC:2.7.1.-];K00924//kinase [EC:2.7.1.-];K00924//kinase [EC:2.7.1.-]
evm.model.Contig108.148	14.555	26.4	1.03253	1.12096e-27	1.71267e-27	XP_022856642.1|1.4e-73|casein kinase II subunit beta-2-like isoform X1 [Olea europaea var. sylvestris]	GO:0005623//cell;GO:0044464//cell part;GO:0005956//protein kinase CK2 complex;GO:0044424//intracellular part;GO:0005622//intracellular;GO:0032991//macromolecular complex;GO:0016772//transferase activity, transferring phosphorus-containing groups;GO:0016740//transferase activity;GO:0030234//enzyme regulator activity;GO:0098772//molecular function regulator;GO:0016301//kinase activity;GO:0019207//k…	K03115//casein kinase II subunit beta+ko04712//Circadian rhythm - plant+ko03008//Ribosome biogenesis in eukaryotes;K03115//casein kinase II subunit beta+ko04712//Circadian rhythm - plant+ko03008//Ribosome biogenesis in eukaryotes
evm.model.Contig108.21	8.485	34.795	2.04755	2.55824e-37	3.26637e-37	XP_022871901.1|3.3e-88|phytochrome-interacting ankyrin-repeat protein 2-like [Olea europaea var. sylvestris]		K21436//ankyrin repeat domain-containing protein 11/12;K06694//26S proteasome non-ATPase regulatory subunit 10
evm.model.Contig108.36	22.47	49.705	1.14725	3.99446e-38	5.03423e-38	XP_011082175.1|1.9e-87|uncharacterized protein LOC105164999 [Sesamum indicum]	GO:0031224//intrinsic component of membrane;GO:0016021//integral component of membrane;GO:0016020//membrane;GO:0044425//membrane part;
evm.model.Contig108.50	49.715	124.775	1.3532	1.35727e-193	4.6062e-194	XP_011092627.1|5.2e-144|uncharacterized protein LOC105172751 isoform X1 [Sesamum indicum]	GO:0031224//intrinsic component of membrane;GO:0044425//membrane part;GO:0016021//integral component of membrane;GO:0016020//membrane;	K12897//transformer-2 protein+ko03040//Spliceosome;K12897//transformer-2 protein+ko03040//Spliceosome
evm.model.Contig108.88	4.735	11.61	1.31026	4.59472e-32	6.42964e-32	XP_022872637.1|5.5e-118|growth-regulating factor 4-like isoform X1 [Olea europaea var. sylvestris]	GO:0034645//cellular macromolecule biosynthetic process;GO:0031326//regulation of cellular biosynthetic process;GO:0010467//gene expression;GO:0071704//organic substance metabolic process;GO:0031323//regulation of cellular metabolic process;GO:0065007//biological regulation;GO:1901362//organic cyclic compound biosynthetic process;GO:0044271//cellular nitrogen compound biosynthetic process;GO:0019…	K22382//WD repeat-containing protein 26;K22382//WD repeat-containing protein 26;K22382//WD repeat-containing protein 26
evm.model.Contig108.93	9.095	36.07	1.96301	6.00123e-131	3.00316e-131	XP_022893702.1|3.2e-91|uncharacterized protein LOC111408131 [Olea europaea var. sylvestris]
evm.model.Contig109.106	0	2.31	5.48908	4.32906e-07	1.27071e-06	XP_022886865.1|6.6e-81|vascular-related unknown protein 1-like [Olea europaea var. sylvestris]	GO:0009888//tissue development;GO:0032502//developmental process;GO:0010089//xylem development;GO:0010087//phloem or xylem histogenesis;GO:0048856//anatomical structure development;
evm.model.Contig109.112	69.52	154.785	1.1591	4.31369e-112	2.45529e-112	XP_022883782.1|2.9e-133|uncharacterized protein LOC111400612 [Olea europaea var. sylvestris]	GO:0016787//hydrolase activity;GO:0016788//hydrolase activity, acting on ester bonds;GO:0052689//carboxylic ester hydrolase activity;GO:0003824//catalytic activity;GO:0008806//carboxymethylenebutenolidase activity;	K01061//carboxymethylenebutenolidase [EC:3.1.1.45]+ko01100//Metabolic pathways+ko01110//Biosynthesis of secondary metabolites
evm.model.Contig109.124	19.055	63.565	1.74041	1.10443e-230	3.17771e-231	XP_022885912.1|8.2e-307|NAC domain-containing protein 17-like [Olea europaea var. sylvestris]		K00521//ferric-chelate reductase [EC:1.16.1.7];K13126//polyadenylate-binding protein+ko03015//mRNA surveillance pathway+ko03018//RNA degradation+ko03013//RNA transport;K03094//S-phase kinase-associated protein 1+ko04141//Protein processing in endoplasmic reticulum+ko04120//Ubiquitin mediated proteolysis;K16296//serine carboxypeptidase-like clade I [EC:3.4.16.-]
evm.model.Contig109.133	55.4	209.51	1.92108	0	0	XP_022851291.1|0.0e+00|protein GIGANTEA-like isoform X1 [Olea europaea var. sylvestris]	GO:0051239//regulation of multicellular organismal process;GO:0050789//regulation of biological process;GO:2000028//regulation of photoperiodism, flowering;GO:0050793//regulation of developmental process;GO:2000241//regulation of reproductive process;GO:0048580//regulation of post-embryonic development;GO:2000026//regulation of multicellular organismal development;GO:0048583//regulation of respon…	K12124//GIGANTEA+ko04712//Circadian rhythm - plant;K12124//GIGANTEA+ko04712//Circadian rhythm - plant
evm.model.Contig109.155	0.08	4.5	5.82468	6.15817e-15	1.30824e-14	XP_022885867.1|2.3e-96|vacuolar iron transporter homolog 2-like [Olea europaea var. sylvestris]		K22736//vacuolar iron transporter family protein
evm.model.Contig109.166	0	0.91	4.68172	9.52041e-05	0.000327736	XP_022886862.1|3.4e-112|nuclear speckle RNA-binding protein B-like [Olea europaea var. sylvestris]		K20725//MAP kinase substrate 1+ko04016//MAPK signaling pathway - plant
evm.model.Contig109.169	1.705	6.12	1.88877	9.21065e-21	1.65355e-20	XP_022885861.1|1.5e-213|alcohol dehydrogenase 1 [Olea europaea var. sylvestris]	GO:0005737//cytoplasm;GO:0044464//cell part;GO:0044424//intracellular part;GO:0005622//intracellular;GO:0005623//cell;GO:0016614//oxidoreductase activity, acting on CH-OH group of donors;GO:0043169//cation binding;GO:0016491//oxidoreductase activity;GO:0016616//oxidoreductase activity, acting on the CH-OH group of donors, NAD or NADP as acceptor;GO:0004022//alcohol dehydrogenase (NAD) activity;GO…	K18857//alcohol dehydrogenase class-P [EC:1.1.1.1]+ko00010//Glycolysis / Gluconeogenesis+ko00350//Tyrosine metabolism+ko00592//alpha-Linolenic acid metabolism+ko01100//Metabolic pathways+ko01110//Biosynthesis of secondary metabolites+ko00071//Fatty acid degradation;K18857//alcohol dehydrogenase class-P [EC:1.1.1.1]+ko00010//Glycolysis / Gluconeogenesis+ko00350//Tyrosine metabolism+ko00592//alpha-…
evm.model.Contig109.185	0.37	1.435	1.96183	2.29174e-07	6.63136e-07	XP_022851435.1|4.9e-287|pentatricopeptide repeat-containing protein At1g43980, mitochondrial [Olea europaea var. sylvestris]		K17710//pentatricopeptide repeat domain-containing protein 1;K19090//CRISPR-associated protein Cas5t
evm.model.Contig109.188	41.385	91.02	1.13682	1.32925e-149	5.8638e-150	XP_022881740.1|2.1e-274|TOM1-like protein 4 [Olea europaea var. sylvestris]	GO:0051234//establishment of localization;GO:0034613//cellular protein localization;GO:0042886//amide transport;GO:0051649//establishment of localization in cell;GO:0015031//protein transport;GO:0071705//nitrogen compound transport;GO:0051179//localization;GO:0070727//cellular macromolecule localization;GO:0008104//protein localization;GO:0006886//intracellular protein transport;GO:0046907//intra…	K12182//hepatocyte growth factor-regulated tyrosine kinase substrate+ko04144//Endocytosis+ko04145//Phagosome;K13141//integrator complex subunit 4
evm.model.Contig109.189	4.01	20.245	2.34021	3.36406e-23	5.68313e-23	XP_022882283.1|8.3e-75|probable calcium-binding protein CML44 [Olea europaea var. sylvestris]	GO:0005488//binding;GO:0005509//calcium ion binding;GO:0043167//ion binding;GO:0046872//metal ion binding;GO:0043169//cation binding;	K13448//calcium-binding protein CML+ko04626//Plant-pathogen interaction
evm.model.Contig109.190	0.12	4.925	5.30621	5.70336e-11	1.39855e-10	XP_022882284.1|9.2e-71|probable calcium-binding protein CML44 [Olea europaea var. sylvestris]	GO:0043169//cation binding;GO:0046872//metal ion binding;GO:0005488//binding;GO:0005509//calcium ion binding;GO:0043167//ion binding;	K13448//calcium-binding protein CML+ko04626//Plant-pathogen interaction
evm.model.Contig109.198	10.5	85.595	3.01642	6.18399e-237	1.73393e-237	XP_022886370.1|3.4e-140|NAC transcription factor 32-like [Olea europaea var. sylvestris]	GO:0060255//regulation of macromolecule metabolic process;GO:0080090//regulation of primary metabolic process;GO:0031326//regulation of cellular biosynthetic process;GO:2001141//regulation of RNA biosynthetic process;GO:0050794//regulation of cellular process;GO:1903506//regulation of nucleic acid-templated transcription;GO:2000112//regulation of cellular macromolecule biosynthetic process;GO:000…	K00521//ferric-chelate reductase [EC:1.16.1.7];K12862//pleiotropic regulator 1+ko03040//Spliceosome;K13126//polyadenylate-binding protein+ko03015//mRNA surveillance pathway+ko03018//RNA degradation+ko03013//RNA transport;K16296//serine carboxypeptidase-like clade I [EC:3.4.16.-]
evm.model.Contig109.43	3.91	19.235	2.30072	4.91128e-82	3.61416e-82	XP_022885967.1|3.0e-275|protein WHAT'S THIS FACTOR 1 [Olea europaea var. sylvestris]		K09566//peptidyl-prolyl isomerase G (cyclophilin G) [EC:5.2.1.8];K02885//large subunit ribosomal protein L19e+ko03010//Ribosome
evm.model.Contig109.46	9.35	36.7	2.04018	3.7249e-190	1.28291e-190	XP_022885958.1|4.7e-175|transcription factor TGA2.2-like isoform X2 [Olea europaea var. sylvestris]	GO:0043170//macromolecule metabolic process;GO:1901576//organic substance biosynthetic process;GO:0044249//cellular biosynthetic process;GO:1901360//organic cyclic compound metabolic process;GO:0008152//metabolic process;GO:0006351//transcription, DNA-templated;GO:0034654//nucleobase-containing compound biosynthetic process;GO:0018130//heterocycle biosynthetic process;GO:0009059//macromolecule bi…	K14431//transcription factor TGA+ko04075//Plant hormone signal transduction;K14431//transcription factor TGA+ko04075//Plant hormone signal transduction;K14431//transcription factor TGA+ko04075//Plant hormone signal transduction;K14431//transcription factor TGA+ko04075//Plant hormone signal transduction;K14431//transcription factor TGA+ko04075//Plant hormone signal transduction;K14431//transcripti…
evm.model.Contig109.48	1.875	20.045	3.03825	8.92503e-57	8.6162e-57	XP_017645056.1|1.5e-20|PREDICTED: uncharacterized protein LOC108485719 [Gossypium arboreum]
evm.model.Contig109.5	1.095	2.395	1.12739	6.93218e-06	2.19529e-05	XP_022886036.1|7.3e-299|probable galacturonosyltransferase 11 [Olea europaea var. sylvestris]		K13648//alpha-1,4-galacturonosyltransferase [EC:2.4.1.43]+ko00520//Amino sugar and nucleotide sugar metabolism
evm.model.Contig109.50	0.485	1.185	1.30112	4.86269e-05	0.000163762	XP_022885953.1|0.0e+00|BTB/POZ domain-containing protein At5g48130 [Olea europaea var. sylvestris]
evm.model.Contig109.70	4.535	12.915	1.5118	1.27903e-09	3.31969e-09	XP_022885935.1|1.1e-82|probable E3 ubiquitin-protein ligase XERICO [Olea europaea var. sylvestris]		K16285//RING/U-box domain-containing protein [EC:2.3.2.27]
evm.model.Contig109.72	0.575	3.285	2.52739	7.42477e-20	1.36437e-19	XP_022885921.1|0.0e+00|uncharacterized membrane protein At3g27390 isoform X1 [Olea europaea var. sylvestris]	GO:0044425//membrane part;GO:0016020//membrane;GO:0016021//integral component of membrane;GO:0031224//intrinsic component of membrane;
evm.model.Contig109.73	18.47	45.21	1.35723	6.16937e-72	5.02357e-72	XP_022885918.1|5.5e-151|uncharacterized protein LOC111402094 isoform X1 [Olea europaea var. sylvestris]	GO:0034622//cellular macromolecular complex assembly;GO:0065004//protein-DNA complex assembly;GO:0016043//cellular component organization;GO:0051276//chromosome organization;GO:0022607//cellular component assembly;GO:0006996//organelle organization;GO:0044085//cellular component biogenesis;GO:0065003//macromolecular complex assembly;GO:0071840//cellular component organization or biogenesis;GO:007…	K11507//centromere protein O;K11507//centromere protein O
evm.model.Contig109.74	0.065	0.71	3.45861	2.07817e-06	6.37031e-06	XP_022863991.1|2.9e-278|xyloglucan galactosyltransferase XLT2-like [Olea europaea var. sylvestris]	GO:0044260//cellular macromolecule metabolic process;GO:0071704//organic substance metabolic process;GO:1901576//organic substance biosynthetic process;GO:0006464//cellular protein modification process;GO:0034645//cellular macromolecule biosynthetic process;GO:0009058//biosynthetic process;GO:0006807//nitrogen compound metabolic process;GO:1901137//carbohydrate derivative biosynthetic process;GO:…	K20888//xyloglucan galactosyltransferase MUR3 [EC:2.4.1.-]
evm.model.Contig109.83	0.365	2.115	2.54422	1.04007e-10	2.57742e-10	EOX98776.1|3.4e-129|HXXXD-type acyl-transferase family protein, putative [Theobroma cacao]	GO:0003824//catalytic activity;GO:0016740//transferase activity;GO:0016747//transferase activity, transferring acyl groups other than amino-acyl groups;GO:0016746//transferase activity, transferring acyl groups;	K15400//omega-hydroxypalmitate O-feruloyl transferase [EC:2.3.1.188]+ko00073//Cutin, suberine and wax biosynthesis
evm.model.Contig109.94	0.265	1.55	2.55619	8.66414e-07	2.5886e-06	XP_022850400.1|1.1e-170|zinc transporter 5-like [Olea europaea var. sylvestris]		K14709//solute carrier family 39 (zinc transporter), member 1/2/3
evm.model.Contig109.97	2.35	129.955	5.78199	0	0	XP_022850313.1|9.7e-231|anthocyanidin 3-O-glucosyltransferase 2-like [Olea europaea var. sylvestris]	GO:0044425//membrane part;GO:0016021//integral component of membrane;GO:0031224//intrinsic component of membrane;GO:0016020//membrane;GO:0016758//transferase activity, transferring hexosyl groups;GO:0003824//catalytic activity;GO:0016757//transferase activity, transferring glycosyl groups;GO:0016740//transferase activity;	K22950//acylphloroglucinol glucosyltransferase [EC:2.4.1.358];K14709//solute carrier family 39 (zinc transporter), member 1/2/3;K08237//hydroquinone glucosyltransferase [EC:2.4.1.218]
evm.model.Contig109.99	1.485	4.32	1.54742	1.19936e-20	2.15922e-20	XP_022885889.1|0.0e+00|pentatricopeptide repeat-containing protein At3g22150, chloroplastic [Olea europaea var. sylvestris]		K22733//magnesium transporter;K01176//alpha-amylase [EC:3.2.1.1]+ko01100//Metabolic pathways+ko00500//Starch and sucrose metabolism
evm.model.Contig11.105	3.27	7.79	1.29758	2.69698e-12	6.26065e-12	XP_022858041.1|8.1e-198|uncharacterized protein LOC111378968 isoform X2 [Olea europaea var. sylvestris]	GO:0016020//membrane;GO:0031224//intrinsic component of membrane;GO:0016021//integral component of membrane;GO:0044425//membrane part;	K09648//mitochondrial inner membrane protease subunit 2 [EC:3.4.21.-]+ko03060//Protein export;K09648//mitochondrial inner membrane protease subunit 2 [EC:3.4.21.-]+ko03060//Protein export
evm.model.Contig11.106	51.55	141.52	1.46034	2.58869e-171	9.93239e-172	XP_022858039.1|9.9e-146|uncharacterized protein LOC111378967 [Olea europaea var. sylvestris]		K06195//ApaG protein
evm.model.Contig11.108	1.655	12.4	3.18736	1.52063e-85	1.08672e-85	XP_022864184.1|8.5e-212|triose phosphate/phosphate translocator, non-green plastid, chloroplastic-like isoform X1 [Olea europaea var. sylvestris]	GO:0031224//intrinsic component of membrane;GO:0044425//membrane part;GO:0016020//membrane;GO:0016021//integral component of membrane;GO:0022857//transmembrane transporter activity;GO:0005215//transporter activity;	K15283//solute carrier family 35, member E1;K15283//solute carrier family 35, member E1;K15283//solute carrier family 35, member E1;K15283//solute carrier family 35, member E1;K15283//solute carrier family 35, member E1;K15283//solute carrier family 35, member E1
evm.model.Contig11.113	10.345	140.255	3.76043	6.91022e-283	1.60178e-283	PIN07875.1|2.6e-72|Iron binding protein involved in Fe-S cluster formation [Handroanthus impetiginosus]	GO:0051186//cofactor metabolic process;GO:0009987//cellular process;GO:0044085//cellular component biogenesis;GO:0031163//metallo-sulfur cluster assembly;GO:0016043//cellular component organization;GO:0044237//cellular metabolic process;GO:0022607//cellular component assembly;GO:0016226//iron-sulfur cluster assembly;GO:0006790//sulfur compound metabolic process;GO:0071840//cellular component orga…	K22068//iron-sulfur cluster assembly enzyme ISCU, mitochondrial
evm.model.Contig11.140	3.36	122.5	5.19056	0	0	XP_011071829.1|1.2e-244|U-box domain-containing protein 19 [Sesamum indicum]	GO:0016874//ligase activity;GO:0019787//ubiquitin-like protein transferase activity;GO:0140096//catalytic activity, acting on a protein;GO:0003824//catalytic activity;GO:0004842//ubiquitin-protein transferase activity;GO:0016740//transferase activity;	K08332//vacuolar protein 8
evm.model.Contig11.143	0.105	9.765	6.5397	7.16622e-23	1.21885e-22	XP_022885308.1|6.3e-84|uncharacterized protein LOC111401682 [Olea europaea var. sylvestris]
evm.model.Contig11.151	2.26	5.825	1.36685	1.65285e-35	2.17503e-35	XP_022885318.1|1.4e-254|calmodulin-binding protein 60 A-like isoform X1 [Olea europaea var. sylvestris]		K21989//calcium permeable stress-gated cation channel;K21989//calcium permeable stress-gated cation channel;K21989//calcium permeable stress-gated cation channel
evm.model.Contig11.183	19.695	73.45	1.88877	3.07549e-296	6.70603e-297	XP_022866178.1|2.4e-195|polynucleotide 5'-hydroxyl-kinase NOL9-like [Olea europaea var. sylvestris]	GO:0044425//membrane part;GO:0016021//integral component of membrane;GO:0016020//membrane;GO:0031224//intrinsic component of membrane;GO:0016772//transferase activity, transferring phosphorus-containing groups;GO:0017076//purine nucleotide binding;GO:0003824//catalytic activity;GO:0016740//transferase activity;GO:0032553//ribonucleotide binding;GO:0097159//organic cyclic compound binding;GO:19013…	K06947//polynucleotide 5'-hydroxyl-kinase GRC3/NOL9 [EC:2.7.1.-];K06947//polynucleotide 5'-hydroxyl-kinase GRC3/NOL9 [EC:2.7.1.-];K06947//polynucleotide 5'-hydroxyl-kinase GRC3/NOL9 [EC:2.7.1.-]
evm.model.Contig11.187	22.415	48.275	1.10724	1.26375e-45	1.4193e-45	XP_011071742.1|7.0e-71|uncharacterized protein LOC105157133 isoform X1 [Sesamum indicum]		K09422//transcription factor MYB, plant
evm.model.Contig11.221	2.985	10.365	1.79191	2.47082e-65	2.16975e-65	XP_022885220.1|0.0e+00|ABC transporter A family member 2 [Olea europaea var. sylvestris]	GO:0044425//membrane part;GO:0016020//membrane;GO:0031224//intrinsic component of membrane;GO:0016021//integral component of membrane;GO:0102025//ATPase-coupled thiosulfate transmembrane transporter activity;GO:0043168//anion binding;GO:0015399//primary active transmembrane transporter activity;GO:0016462//pyrophosphatase activity;GO:0022804//active transmembrane transporter activity;GO:0005215//…	K05643//ATP-binding cassette, subfamily A (ABC1), member 3+ko02010//ABC transporters
evm.model.Contig11.228	0.515	1.185	1.20797	6.46567e-07	1.91655e-06	XP_022864636.1|1.1e-177|pentatricopeptide repeat-containing protein At4g20740 [Olea europaea var. sylvestris]	GO:0043170//macromolecule metabolic process;GO:0006139//nucleobase-containing compound metabolic process;GO:0006807//nitrogen compound metabolic process;GO:0008152//metabolic process;GO:0016070//RNA metabolic process;GO:0006725//cellular aromatic compound metabolic process;GO:0009987//cellular process;GO:0009451//RNA modification;GO:0044237//cellular metabolic process;GO:0043412//macromolecule mo…	K17964//leucine-rich PPR motif-containing protein, mitochondrial;K17964//leucine-rich PPR motif-containing protein, mitochondrial
evm.model.Contig11.24	2.425	11.4	2.31593	1.07573e-40	1.29871e-40	XP_022885341.1|4.1e-189|BTB/POZ and TAZ domain-containing protein 1 [Olea europaea var. sylvestris]	GO:0060255//regulation of macromolecule metabolic process;GO:0050789//regulation of biological process;GO:0050794//regulation of cellular process;GO:0009889//regulation of biosynthetic process;GO:0031326//regulation of cellular biosynthetic process;GO:0006355//regulation of transcription, DNA-templated;GO:2001141//regulation of RNA biosynthetic process;GO:0010556//regulation of macromolecule bios…	K10523//speckle-type POZ protein;K02987//small subunit ribosomal protein S4e+ko03010//Ribosome;K10523//speckle-type POZ protein;K02987//small subunit ribosomal protein S4e+ko03010//Ribosome
evm.model.Contig11.249	0.625	2.43	1.96466	1.01188e-09	2.61689e-09	XP_022883629.1|2.1e-254|putative pentatricopeptide repeat-containing protein At3g05240 [Olea europaea var. sylvestris]		K19090//CRISPR-associated protein Cas5t;K19589//release factor glutamine methyltransferase [EC:2.1.1.297]
evm.model.Contig11.253	1.07	4.2	1.9739	3.7682e-21	6.70125e-21	PIN23919.1|3.8e-294|hypothetical protein CDL12_03345 [Handroanthus impetiginosus]	GO:0046914//transition metal ion binding;GO:0046872//metal ion binding;GO:0005488//binding;GO:0043167//ion binding;GO:0043169//cation binding;GO:0008270//zinc ion binding;	K03452//magnesium/proton exchanger;K22733//magnesium transporter
evm.model.Contig11.268	0.82	1.905	1.21606	2.9279e-05	9.70605e-05	XP_011087244.1|5.7e-229|pentatricopeptide repeat-containing protein At3g47530 [Sesamum indicum]	GO:0046914//transition metal ion binding;GO:0046872//metal ion binding;GO:0008270//zinc ion binding;GO:0005488//binding;GO:0043169//cation binding;GO:0043167//ion binding;	K10683//BRCA1-associated RING domain protein 1+ko03440//Homologous recombination;K03452//magnesium/proton exchanger;K22733//magnesium transporter
evm.model.Contig11.270	4.33	13.535	1.63019	1.80621e-06	5.51624e-06	XP_022844956.1|2.9e-33|uncharacterized protein LOC111368026 [Olea europaea var. sylvestris]	GO:0005737//cytoplasm;GO:0043232//intracellular non-membrane-bounded organelle;GO:0044464//cell part;GO:0005622//intracellular;GO:0043229//intracellular organelle;GO:0032991//macromolecular complex;GO:0043228//non-membrane-bounded organelle;GO:0043226//organelle;GO:0044444//cytoplasmic part;GO:0044424//intracellular part;GO:0005623//cell;GO:0005840//ribosome;GO:1990904//ribonucleoprotein complex;
evm.model.Contig11.283	2.93	15.32	2.38868	7.70816e-47	8.4838e-47	XP_022883622.1|5.6e-175|NAC domain-containing protein 100-like [Olea europaea var. sylvestris]		K00521//ferric-chelate reductase [EC:1.16.1.7];K13126//polyadenylate-binding protein+ko03015//mRNA surveillance pathway+ko03018//RNA degradation+ko03013//RNA transport;K16296//serine carboxypeptidase-like clade I [EC:3.4.16.-];K12862//pleiotropic regulator 1+ko03040//Spliceosome
evm.model.Contig11.290	0.665	4.11	2.65135	3.92143e-09	1.04069e-08	XP_022885177.1|1.6e-86|uncharacterized protein LOC111401600 [Olea europaea var. sylvestris]
evm.model.Contig11.295	0.565	9.75	4.1127	1.1726e-161	4.76604e-162	XP_022885171.1|0.0e+00|probable LRR receptor-like serine/threonine-protein kinase At1g74360 [Olea europaea var. sylvestris]	GO:0031224//intrinsic component of membrane;GO:0016021//integral component of membrane;GO:0044425//membrane part;GO:0016020//membrane;GO:0016740//transferase activity;GO:0016773//phosphotransferase activity, alcohol group as acceptor;GO:0016772//transferase activity, transferring phosphorus-containing groups;GO:0043167//ion binding;GO:0032553//ribonucleotide binding;GO:0140096//catalytic activity…	K13415//protein brassinosteroid insensitive 1 [EC:2.7.10.1 2.7.11.1]+ko04075//Plant hormone signal transduction
evm.model.Contig11.299	3.675	11.295	1.6353	1.335e-49	1.41202e-49	XP_022885170.1|4.9e-308|uncharacterized protein LOC111401592 [Olea europaea var. sylvestris]
evm.model.Contig11.308	5.11	13.46	1.39932	3.04719e-09	8.0472e-09	XP_022885157.1|4.7e-65|uncharacterized protein LOC111401585 [Olea europaea var. sylvestris]
evm.model.Contig11.311	2.49	5.505	1.10311	4.6091e-13	1.04085e-12	XP_022885154.1|8.3e-259|F-box/kelch-repeat protein At1g51550-like [Olea europaea var. sylvestris]		K12115//clock-associated PAS protein ZTL+ko04712//Circadian rhythm - plant;K12117//LOV kelch protein 2;K12117//LOV kelch protein 2;K12115//clock-associated PAS protein ZTL+ko04712//Circadian rhythm - plant
evm.model.Contig11.314	1.225	2.975	1.27608	2.47653e-06	7.63683e-06	XP_022885150.1|1.6e-117|B-box zinc finger protein 32-like [Olea europaea var. sylvestris]	GO:0046872//metal ion binding;GO:0046914//transition metal ion binding;GO:0043169//cation binding;GO:0008270//zinc ion binding;GO:0043167//ion binding;GO:0005488//binding;	K10955//mucin-2
evm.model.Contig11.323	3.91	8.755	1.02195	3.61016e-16	7.35993e-16	PIN07946.1|0.0e+00|Exocyst complex subunit [Handroanthus impetiginosus]	GO:0006887//exocytosis;GO:0046903//secretion;GO:0009987//cellular process;GO:0051179//localization;GO:0032940//secretion by cell;GO:0006810//transport;GO:0051234//establishment of localization;GO:0016192//vesicle-mediated transport;GO:0005737//cytoplasm;GO:0044448//cell cortex part;GO:0032991//macromolecular complex;GO:0005622//intracellular;GO:0071944//cell periphery;GO:0044444//cytoplasmic part…	K19986//exocyst complex component 8;K19986//exocyst complex component 8
evm.model.Contig11.33	45.085	107.965	1.46354	0	0	XP_022885338.1|7.4e-283|cytochrome P450 71A1-like [Olea europaea var. sylvestris]	GO:0044425//membrane part;GO:0016021//integral component of membrane;GO:0016020//membrane;GO:0031224//intrinsic component of membrane;GO:0043167//ion binding;GO:0016491//oxidoreductase activity;GO:0020037//heme binding;GO:0048037//cofactor binding;GO:0046872//metal ion binding;GO:0046906//tetrapyrrole binding;GO:0016705//oxidoreductase activity, acting on paired donors, with incorporation or redu…	K20617//cytochrome P450 family 71 subfamily A;K20617//cytochrome P450 family 71 subfamily A;K20617//cytochrome P450 family 71 subfamily A
evm.model.Contig11.346	4.38	9.285	1.07264	4.69408e-35	6.21721e-35	XP_022879254.1|0.0e+00|uncharacterized protein LOC111396885 [Olea europaea var. sylvestris]	GO:0016021//integral component of membrane;GO:0016020//membrane;GO:0031224//intrinsic component of membrane;GO:0044425//membrane part;GO:0043168//anion binding;GO:0008289//lipid binding;GO:0005488//binding;GO:0043167//ion binding;GO:0035091//phosphatidylinositol binding;GO:0005543//phospholipid binding;	K17925//sorting nexin-13;K17925//sorting nexin-13
evm.model.Contig11.357	7.57	26.785	1.82677	4.93476e-35	6.53977e-35	XP_022879120.1|4.6e-114|uncharacterized protein LOC111396813 isoform X2 [Olea europaea var. sylvestris]	GO:0016021//integral component of membrane;GO:0031224//intrinsic component of membrane;GO:0044425//membrane part;GO:0016020//membrane;
evm.model.Contig11.41	1.425	3.08	1.11187	9.59735e-11	2.37424e-10	XP_022843601.1|1.7e-263|putative late blight resistance protein homolog R1A-10 isoform X1 [Olea europaea var. sylvestris]		K13457//disease resistance protein RPM1+ko04626//Plant-pathogen interaction;K13453//disease resistance protein+ko04626//Plant-pathogen interaction
evm.model.Contig11.48	0.41	3.12	2.91552	2.90534e-23	4.90064e-23	XP_022871955.1|1.2e-285|cytochrome P450 71A3-like isoform X3 [Olea europaea var. sylvestris]	GO:0016021//integral component of membrane;GO:0031224//intrinsic component of membrane;GO:0044425//membrane part;GO:0016020//membrane;GO:0004497//monooxygenase activity;GO:0003824//catalytic activity;GO:1901363//heterocyclic compound binding;GO:0016491//oxidoreductase activity;GO:0043167//ion binding;GO:0046906//tetrapyrrole binding;GO:0005506//iron ion binding;GO:0016705//oxidoreductase activity…	K00512//steroid 17alpha-monooxygenase / 17alpha-hydroxyprogesterone deacetylase [EC:1.14.14.19 1.14.14.32]+ko01100//Metabolic pathways;K00512//steroid 17alpha-monooxygenase / 17alpha-hydroxyprogesterone deacetylase [EC:1.14.14.19 1.14.14.32]+ko01100//Metabolic pathways
evm.model.Contig11.63	4.035	254.54	5.96858	0	0	XP_022893015.1|2.3e-45|uncharacterized protein LOC111407633 [Olea europaea var. sylvestris]		K04371//mitogen-activated protein kinase 1/3 [EC:2.7.11.24]+ko04933//AGE-RAGE signaling pathway in diabetic complications;K04422//mitogen-activated protein kinase kinase kinase 13 [EC:2.7.11.25]
evm.model.Contig11.76	0.065	1.12	4.09676	1.80706e-05	5.89407e-05	XP_004235594.1|2.9e-69|chaperonin CPN60-like 2, mitochondrial [Solanum lycopersicum]	GO:0006457//protein folding;GO:0009987//cellular process;GO:0042026//protein refolding;GO:0044464//cell part;GO:0005622//intracellular;GO:0005623//cell;GO:0005737//cytoplasm;GO:0044424//intracellular part;GO:0043168//anion binding;GO:0097159//organic cyclic compound binding;GO:0035639//purine ribonucleoside triphosphate binding;GO:0032555//purine ribonucleotide binding;GO:0043167//ion binding;GO:…	K04077//chaperonin GroEL+ko03018//RNA degradation
evm.model.Contig110.103	20.12	50.445	1.2412	7.68317e-106	4.59033e-106	XP_022874526.1|1.8e-217|casein kinase 1-like protein 10 [Olea europaea var. sylvestris]	GO:0035639//purine ribonucleoside triphosphate binding;GO:0004674//protein serine/threonine kinase activity;GO:1901363//heterocyclic compound binding;GO:0097367//carbohydrate derivative binding;GO:0016772//transferase activity, transferring phosphorus-containing groups;GO:0008144//drug binding;GO:0005524//ATP binding;GO:0032559//adenyl ribonucleotide binding;GO:0036094//small molecule binding;GO:…	K08959//casein kinase 1, delta [EC:2.7.11.1];K08960//casein kinase 1, epsilon [EC:2.7.11.1];K08959//casein kinase 1, delta [EC:2.7.11.1];K08960//casein kinase 1, epsilon [EC:2.7.11.1]
evm.model.Contig110.128	2.33	9.41	2.01103	2.31889e-23	3.90364e-23	XP_022874509.1|8.3e-168|uncharacterized protein LOC111393281 [Olea europaea var. sylvestris]		K03495//tRNA uridine 5-carboxymethylaminomethyl modification enzyme
evm.model.Contig110.142	1.895	4.235	1.19461	3.20596e-08	8.87749e-08	XP_022864525.1|7.2e-47|transcription factor MYB1R1-like [Olea europaea var. sylvestris]	GO:0097659//nucleic acid-templated transcription;GO:0044249//cellular biosynthetic process;GO:0006351//transcription, DNA-templated;GO:0010556//regulation of macromolecule biosynthetic process;GO:0071704//organic substance metabolic process;GO:0060255//regulation of macromolecule metabolic process;GO:0019438//aromatic compound biosynthetic process;GO:0016070//RNA metabolic process;GO:0034645//cel…
evm.model.Contig110.146	0.105	0.955	3.18422	4.85361e-05	0.000163449	XP_022849097.1|2.2e-148|RING-H2 finger protein ATL33-like [Olea europaea var. sylvestris]		K11982//E3 ubiquitin-protein ligase RNF115/126 [EC:2.3.2.27];K22378//E3 ubiquitin-protein ligase RNF181 [EC:2.3.2.27]
evm.model.Contig110.148	8.85	14.655	1.03671	3.73005e-20	6.80243e-20	XP_022849091.1|1.3e-169|E3 ubiquitin-protein ligase SINAT2-like isoform X1 [Olea europaea var. sylvestris]	GO:0044267//cellular protein metabolic process;GO:0044260//cellular macromolecule metabolic process;GO:0043170//macromolecule metabolic process;GO:0048856//anatomical structure development;GO:0007275//multicellular organism development;GO:0043632//modification-dependent macromolecule catabolic process;GO:0032446//protein modification by small protein conjugation;GO:0070647//protein modification b…	K04506//E3 ubiquitin-protein ligase SIAH1 [EC:2.3.2.27]+ko04120//Ubiquitin mediated proteolysis;K04506//E3 ubiquitin-protein ligase SIAH1 [EC:2.3.2.27]+ko04120//Ubiquitin mediated proteolysis
evm.model.Contig110.166	0.045	0.29	2.68172	0.000961083	0.0036138	XP_022849075.1|0.0e+00|exocyst complex component EXO70H1-like [Olea europaea var. sylvestris]	GO:0071702//organic substance transport;GO:0032940//secretion by cell;GO:0009987//cellular process;GO:0046903//secretion;GO:0015031//protein transport;GO:0033036//macromolecule localization;GO:0071705//nitrogen compound transport;GO:0051234//establishment of localization;GO:0006887//exocytosis;GO:0042886//amide transport;GO:0006810//transport;GO:0016192//vesicle-mediated transport;GO:0008104//pro…	K07195//exocyst complex component 7
evm.model.Contig110.18	15.13	41.33	1.45578	5.03255e-70	4.18786e-70	XP_022866005.1|7.2e-127|RPM1-interacting protein 4-like isoform X1 [Olea europaea var. sylvestris]		K13456//RPM1-interacting protein 4+ko04626//Plant-pathogen interaction;K13456//RPM1-interacting protein 4+ko04626//Plant-pathogen interaction
evm.model.Contig110.181	0.65	22.345	5.13018	1.73334e-33	2.36384e-33	PSR95161.1|1.3e-09|Transcriptional regulator like [Actinidia chinensis var. chinensis]
evm.model.Contig110.183	29.905	68.295	1.20666	2.30316e-144	1.04839e-144	XP_022849057.1|8.5e-158|ethylene-responsive transcription factor RAP2-7-like isoform X3 [Olea europaea var. sylvestris]	GO:0044260//cellular macromolecule metabolic process;GO:0044237//cellular metabolic process;GO:0046483//heterocycle metabolic process;GO:0090304//nucleic acid metabolic process;GO:0044271//cellular nitrogen compound biosynthetic process;GO:0032502//developmental process;GO:0008152//metabolic process;GO:0010467//gene expression;GO:0032774//RNA biosynthetic process;GO:0006139//nucleobase-containing…	K09284//AP2-like factor, euAP2 lineage;K09284//AP2-like factor, euAP2 lineage;K09284//AP2-like factor, euAP2 lineage;K09284//AP2-like factor, euAP2 lineage;K09284//AP2-like factor, euAP2 lineage
evm.model.Contig110.190	0.86	2.04	1.2543	3.80275e-05	0.000127061	XP_022857374.1|2.8e-200|pentatricopeptide repeat-containing protein At1g07590, mitochondrial isoform X2 [Olea europaea var. sylvestris]		K17964//leucine-rich PPR motif-containing protein, mitochondrial;K17710//pentatricopeptide repeat domain-containing protein 1
evm.model.Contig110.192	0.435	14.435	5.20718	7.70122e-185	2.75949e-185	XP_022874441.1|2.3e-221|uncharacterized protein LOC111393235 isoform X2 [Olea europaea var. sylvestris]
evm.model.Contig110.200	2.655	54.63	4.30409	0	0	XP_022857385.1|7.2e-244|putative E3 ubiquitin-protein ligase XBAT31 isoform X2 [Olea europaea var. sylvestris]	GO:0044424//intracellular part;GO:1905369//endopeptidase complex;GO:0000502//proteasome complex;GO:0005623//cell;GO:1902494//catalytic complex;GO:0044464//cell part;GO:0005622//intracellular;GO:1905368//peptidase complex;GO:0032991//macromolecular complex;GO:0016874//ligase activity;GO:0003824//catalytic activity;	K19044//E3 ubiquitin-protein ligase XBAT32/33 [EC:2.3.2.27];K19044//E3 ubiquitin-protein ligase XBAT32/33 [EC:2.3.2.27];K19044//E3 ubiquitin-protein ligase XBAT32/33 [EC:2.3.2.27];K19044//E3 ubiquitin-protein ligase XBAT32/33 [EC:2.3.2.27]
evm.model.Contig110.205	15.46	31.48	1.026	2.50978e-61	2.29715e-61	XP_022867988.1|7.8e-190|glycine--tRNA ligase, mitochondrial 1-like isoform X1 [Olea europaea var. sylvestris]	GO:0043170//macromolecule metabolic process;GO:0009987//cellular process;GO:0043043//peptide biosynthetic process;GO:0043603//cellular amide metabolic process;GO:0044267//cellular protein metabolic process;GO:0019538//protein metabolic process;GO:0016070//RNA metabolic process;GO:0006426//glycyl-tRNA aminoacylation;GO:1901564//organonitrogen compound metabolic process;GO:0034645//cellular macromo…	K01880//glycyl-tRNA synthetase [EC:6.1.1.14]+ko00970//Aminoacyl-tRNA biosynthesis;K01880//glycyl-tRNA synthetase [EC:6.1.1.14]+ko00970//Aminoacyl-tRNA biosynthesis
evm.model.Contig110.215	1.355	12.58	3.21822	5.19542e-61	4.77669e-61	XP_022864412.1|6.7e-164|uncharacterized protein LOC111384368 [Olea europaea var. sylvestris]	GO:0031224//intrinsic component of membrane;GO:0016020//membrane;GO:0044425//membrane part;GO:0016021//integral component of membrane;
evm.model.Contig110.221	1.42	2.87	1.01151	1.85396e-06	5.66574e-06	XP_022874337.1|2.8e-275|IQ domain-containing protein IQM2-like [Olea europaea var. sylvestris]		K04733//interleukin-1 receptor-associated kinase 4 [EC:2.7.11.1];K01214//isoamylase [EC:3.2.1.68]+ko01100//Metabolic pathways+ko00500//Starch and sucrose metabolism+ko01110//Biosynthesis of secondary metabolites;K06892//feruloyl-CoA ortho-hydroxylase [EC:1.14.11.-]+ko01110//Biosynthesis of secondary metabolites+ko00940//Phenylpropanoid biosynthesis
evm.model.Contig110.24	0.295	1.09	1.90412	0.000482727	0.00176208	XP_022885008.1|4.6e-57|mitogen-activated protein kinase kinase 5-like [Olea europaea var. sylvestris]	GO:0004674//protein serine/threonine kinase activity;GO:0016773//phosphotransferase activity, alcohol group as acceptor;GO:0032555//purine ribonucleotide binding;GO:0043167//ion binding;GO:0008144//drug binding;GO:0036094//small molecule binding;GO:1901265//nucleoside phosphate binding;GO:0003824//catalytic activity;GO:1901363//heterocyclic compound binding;GO:0030554//adenyl nucleotide binding;G…	K13413//mitogen-activated protein kinase kinase 4/5 [EC:2.7.12.2]+ko04016//MAPK signaling pathway - plant+ko04626//Plant-pathogen interaction+ko04075//Plant hormone signal transduction;K13413//mitogen-activated protein kinase kinase 4/5 [EC:2.7.12.2]+ko04016//MAPK signaling pathway - plant+ko04626//Plant-pathogen interaction+ko04075//Plant hormone signal transduction
evm.model.Contig110.240	10.245	24.69	1.34876	3.50017e-95	2.28854e-95	XP_022849137.1|1.4e-185|peroxisomal nicotinamide adenine dinucleotide carrier-like isoform X4 [Olea europaea var. sylvestris]	GO:0051179//localization;GO:0051234//establishment of localization;GO:0006810//transport;GO:0016020//membrane;GO:0044425//membrane part;GO:0016021//integral component of membrane;GO:0031224//intrinsic component of membrane;	K13354//solute carrier family 25 (peroxisomal adenine nucleotide transporter), member 17+ko04146//Peroxisome;K13354//solute carrier family 25 (peroxisomal adenine nucleotide transporter), member 17+ko04146//Peroxisome;K13354//solute carrier family 25 (peroxisomal adenine nucleotide transporter), member 17+ko04146//Peroxisome;K13354//solute carrier family 25 (peroxisomal adenine nucleotide transpo…
evm.model.Contig110.8	0.37	1.255	1.74603	0.000590679	0.00217455	XP_022848981.1|7.3e-120|ethylene-responsive transcription factor-like protein At4g13040 isoform X2 [Olea europaea var. sylvestris]
evm.model.Contig110.83	0.03	0.53	4.26669	5.22504e-06	1.64253e-05	XP_022860315.1|1.5e-144|probable leucine-rich repeat receptor-like protein kinase At2g33170 isoform X1 [Olea europaea var. sylvestris]		K13420//LRR receptor-like serine/threonine-protein kinase FLS2 [EC:2.7.11.1]+ko04016//MAPK signaling pathway - plant+ko04626//Plant-pathogen interaction
evm.model.Contig110.84	0.035	1.4	5.22604	1.83953e-10	4.60721e-10	XP_022859147.1|9.8e-136|leucine-rich repeat receptor-like serine/threonine-protein kinase BAM2, partial [Olea europaea var. sylvestris]		K13415//protein brassinosteroid insensitive 1 [EC:2.7.10.1 2.7.11.1]+ko04075//Plant hormone signal transduction
evm.model.Contig110.86	63.96	164.86	1.37025	1.31876e-66	1.14155e-66	XP_022879027.1|3.0e-62|multiple organellar RNA editing factor 2, chloroplastic-like [Olea europaea var. sylvestris]	GO:0043170//macromolecule metabolic process;GO:0016553//base conversion or substitution editing;GO:0006139//nucleobase-containing compound metabolic process;GO:0034641//cellular nitrogen compound metabolic process;GO:0044238//primary metabolic process;GO:0006807//nitrogen compound metabolic process;GO:1901360//organic cyclic compound metabolic process;GO:0006725//cellular aromatic compound metabo…	K00655//1-acyl-sn-glycerol-3-phosphate acyltransferase [EC:2.3.1.51]+ko01100//Metabolic pathways+ko01110//Biosynthesis of secondary metabolites+ko00564//Glycerophospholipid metabolism+ko00561//Glycerolipid metabolism;K09699//2-oxoisovalerate dehydrogenase E2 component (dihydrolipoyl transacylase) [EC:2.3.1.168]+ko00280//Valine, leucine and isoleucine degradation+ko00640//Propanoate metabolism+ko0…
evm.model.Contig110.88	1.01	2.07	1.04018	0.000596732	0.00219756	XP_022879029.1|1.5e-168|serine/threonine-protein kinase UCNL-like [Olea europaea var. sylvestris]		K20714//serine/threonine-protein kinase OXI1 [EC:2.7.11.1]+ko04016//MAPK signaling pathway - plant
evm.model.Contig110.98	0.245	25.64	6.71881	3.36406e-142	1.55083e-142	XP_022879040.1|5.0e-77|protein CUP-SHAPED COTYLEDON 3-like [Olea europaea var. sylvestris]	GO:0006355//regulation of transcription, DNA-templated;GO:0009987//cellular process;GO:0097659//nucleic acid-templated transcription;GO:1901360//organic cyclic compound metabolic process;GO:0032774//RNA biosynthetic process;GO:0060255//regulation of macromolecule metabolic process;GO:1903506//regulation of nucleic acid-templated transcription;GO:0044238//primary metabolic process;GO:0044271//cell…	K00521//ferric-chelate reductase [EC:1.16.1.7];K05941//glutathione gamma-glutamylcysteinyltransferase [EC:2.3.2.15];K13126//polyadenylate-binding protein+ko03015//mRNA surveillance pathway+ko03018//RNA degradation+ko03013//RNA transport;K16296//serine carboxypeptidase-like clade I [EC:3.4.16.-];K00521//ferric-chelate reductase [EC:1.16.1.7];K05941//glutathione gamma-glutamylcysteinyltransferase […
evm.model.Contig111.106	43.085	88.445	1.0448	3.60361e-245	9.75727e-246	XP_022882683.1|0.0e+00|probable galactinol--sucrose galactosyltransferase 2 isoform X1 [Olea europaea var. sylvestris]		K06617//raffinose synthase [EC:2.4.1.82]+ko00052//Galactose metabolism;K06617//raffinose synthase [EC:2.4.1.82]+ko00052//Galactose metabolism;K06617//raffinose synthase [EC:2.4.1.82]+ko00052//Galactose metabolism
evm.model.Contig111.108	32.755	172.595	2.37385	0	0	XP_022882677.1|2.7e-189|guanylate kinase 2-like isoform X1 [Olea europaea var. sylvestris]	GO:0044444//cytoplasmic part;GO:0005737//cytoplasm;GO:0005622//intracellular;GO:0044464//cell part;GO:0044424//intracellular part;GO:0005829//cytosol;GO:0005623//cell;GO:0050145//nucleoside phosphate kinase activity;GO:0016776//phosphotransferase activity, phosphate group as acceptor;GO:0016740//transferase activity;GO:0016772//transferase activity, transferring phosphorus-containing groups;GO:00…	K00942//guanylate kinase [EC:2.7.4.8]+ko00230//Purine metabolism+ko01100//Metabolic pathways;K00942//guanylate kinase [EC:2.7.4.8]+ko00230//Purine metabolism+ko01100//Metabolic pathways;K00942//guanylate kinase [EC:2.7.4.8]+ko00230//Purine metabolism+ko01100//Metabolic pathways;K00942//guanylate kinase [EC:2.7.4.8]+ko00230//Purine metabolism+ko01100//Metabolic pathways
evm.model.Contig111.27	0.105	1.04	3.26669	5.25738e-07	1.55027e-06	XP_022852386.1|2.3e-212|WAT1-related protein At5g07050-like [Olea europaea var. sylvestris]	GO:0031224//intrinsic component of membrane;GO:0016021//integral component of membrane;GO:0016020//membrane;GO:0044425//membrane part;GO:0005215//transporter activity;GO:0022857//transmembrane transporter activity;	K17500//integrin-linked kinase-associated serine/threonine phosphatase 2C [EC:3.1.3.16]
evm.model.Contig111.3	3.615	12.01	1.7387	2.42375e-67	2.07508e-67	XP_022888514.1|0.0e+00|alpha-L-arabinofuranosidase 1-like isoform X2 [Olea europaea var. sylvestris]	GO:0005975//carbohydrate metabolic process;GO:0044238//primary metabolic process;GO:0071704//organic substance metabolic process;GO:0044281//small molecule metabolic process;GO:0008152//metabolic process;GO:0005996//monosaccharide metabolic process;GO:0046373//L-arabinose metabolic process;GO:0019566//arabinose metabolic process;GO:0019321//pentose metabolic process;GO:0016787//hydrolase activity…	K01209//alpha-N-arabinofuranosidase [EC:3.2.1.55]+ko00520//Amino sugar and nucleotide sugar metabolism;K01209//alpha-N-arabinofuranosidase [EC:3.2.1.55]+ko00520//Amino sugar and nucleotide sugar metabolism;K01209//alpha-N-arabinofuranosidase [EC:3.2.1.55]+ko00520//Amino sugar and nucleotide sugar metabolism
evm.model.Contig111.31	0.715	1.66	1.21778	1.49097e-06	4.52706e-06	XP_022852379.1|0.0e+00|DExH-box ATP-dependent RNA helicase DExH18, mitochondrial-like [Olea europaea var. sylvestris]	GO:0016787//hydrolase activity;GO:0017111//nucleoside-triphosphatase activity;GO:0016462//pyrophosphatase activity;GO:0016818//hydrolase activity, acting on acid anhydrides, in phosphorus-containing anhydrides;GO:0003824//catalytic activity;GO:0004386//helicase activity;GO:0016817//hydrolase activity, acting on acid anhydrides;	K17675//ATP-dependent RNA helicase SUPV3L1/SUV3 [EC:3.6.4.13]
evm.model.Contig111.39	2.945	22.04	2.9062	1.77549e-117	9.7233e-118	XP_022888230.1|1.7e-262|probable mediator of RNA polymerase II transcription subunit 26b isoform X1 [Olea europaea var. sylvestris]
evm.model.Contig111.5	10.655	44.76	2.07032	3.08379e-264	7.67595e-265	XP_011079239.1|0.0e+00|alpha-L-arabinofuranosidase 1 isoform X1 [Sesamum indicum]	GO:0046373//L-arabinose metabolic process;GO:0044281//small molecule metabolic process;GO:0019566//arabinose metabolic process;GO:0008152//metabolic process;GO:0044238//primary metabolic process;GO:0005996//monosaccharide metabolic process;GO:0019321//pentose metabolic process;GO:0005975//carbohydrate metabolic process;GO:0071704//organic substance metabolic process;GO:0046556//alpha-L-arabinofur…	K01209//alpha-N-arabinofuranosidase [EC:3.2.1.55]+ko00520//Amino sugar and nucleotide sugar metabolism;K01209//alpha-N-arabinofuranosidase [EC:3.2.1.55]+ko00520//Amino sugar and nucleotide sugar metabolism;K01209//alpha-N-arabinofuranosidase [EC:3.2.1.55]+ko00520//Amino sugar and nucleotide sugar metabolism;K01209//alpha-N-arabinofuranosidase [EC:3.2.1.55]+ko00520//Amino sugar and nucleotide suga…
evm.model.Contig111.62	1.46	196.99	6.98845	0	0	XP_022873099.1|7.0e-305|beta-glucosidase-like isoform X2 [Olea europaea var. sylvestris]		K01188//beta-glucosidase [EC:3.2.1.21]+ko01100//Metabolic pathways+ko00500//Starch and sucrose metabolism+ko01110//Biosynthesis of secondary metabolites+ko00460//Cyanoamino acid metabolism+ko00940//Phenylpropanoid biosynthesis;K01188//beta-glucosidase [EC:3.2.1.21]+ko01100//Metabolic pathways+ko00500//Starch and sucrose metabolism+ko01110//Biosynthesis of secondary metabolites+ko00460//Cyanoamino…
evm.model.Contig111.72	119.945	268.065	1.15895	1.28603e-168	4.99324e-169	XP_022855207.1|9.9e-93|probable calcium-binding protein CML35 [Olea europaea var. sylvestris]	GO:0005488//binding;GO:0043169//cation binding;GO:0046872//metal ion binding;GO:0043167//ion binding;GO:0005509//calcium ion binding;	K13448//calcium-binding protein CML+ko04626//Plant-pathogen interaction
evm.model.Contig111.75	1.005	2.02	1.2848	1.81453e-21	3.19795e-21	XP_022854422.1|1.6e-31|uncharacterized protein LOC111375768 [Olea europaea var. sylvestris]		K13457//disease resistance protein RPM1+ko04626//Plant-pathogen interaction;K14175//(3S,6E)-nerolidol synthase [EC:4.2.3.48]+ko00909//Sesquiterpenoid and triterpenoid biosynthesis+ko01100//Metabolic pathways;K07393//glutathionyl-hydroquinone reductase [EC:1.8.5.7];K01183//chitinase [EC:3.2.1.14]+ko00520//Amino sugar and nucleotide sugar metabolism+ko01100//Metabolic pathways;K07478//putative ATPa…
evm.model.Contig111.76	0.65	3.93	2.56991	1.38613e-08	3.77494e-08	XP_022873157.1|3.0e-80|beta-D-glucosyl crocetin beta-1,6-glucosyltransferase-like [Olea europaea var. sylvestris]		K13080//flavanone 7-O-glucoside 2''-O-beta-L-rhamnosyltransferase [EC:2.4.1.236]+ko00941//Flavonoid biosynthesis+ko00944//Flavone and flavonol biosynthesis
evm.model.Contig111.85	144.1	309.01	1.09751	0	0	XP_022888272.1|6.3e-153|probable calcium-binding protein CML49 [Olea europaea var. sylvestris]	GO:0043169//cation binding;GO:0005509//calcium ion binding;GO:0046872//metal ion binding;GO:0043167//ion binding;GO:0005488//binding;	K13448//calcium-binding protein CML+ko04626//Plant-pathogen interaction;K13448//calcium-binding protein CML+ko04626//Plant-pathogen interaction
evm.model.Contig111.89	4.53	21.565	2.2436	9.76613e-41	1.178e-40	XP_022888274.1|6.7e-127|heat stress transcription factor B-3-like [Olea europaea var. sylvestris]	GO:0043227//membrane-bounded organelle;GO:0043226//organelle;GO:0044464//cell part;GO:0044424//intracellular part;GO:0043229//intracellular organelle;GO:0005622//intracellular;GO:0005623//cell;GO:0005634//nucleus;GO:0043231//intracellular membrane-bounded organelle;GO:0003700//DNA binding transcription factor activity;GO:1901363//heterocyclic compound binding;GO:0140110//transcription regulator a…	K09419//heat shock transcription factor, other eukaryote
evm.model.Contig112.111	20.2	342.455	4.07616	0	0	ALR35193.1|3.7e-133|caffeoyl CoA-O- methyl-transferas [Fraxinus mandshurica]	GO:0009058//biosynthetic process;GO:1901360//organic cyclic compound metabolic process;GO:0009808//lignin metabolic process;GO:0044249//cellular biosynthetic process;GO:0009699//phenylpropanoid biosynthetic process;GO:0019438//aromatic compound biosynthetic process;GO:0071704//organic substance metabolic process;GO:0044237//cellular metabolic process;GO:1901362//organic cyclic compound biosynthet…	K00588//caffeoyl-CoA O-methyltransferase [EC:2.1.1.104]+ko01100//Metabolic pathways+ko01110//Biosynthesis of secondary metabolites+ko00940//Phenylpropanoid biosynthesis+ko00941//Flavonoid biosynthesis+ko00945//Stilbenoid, diarylheptanoid and gingerol biosynthesis+ko00360//Phenylalanine metabolism
evm.model.Contig112.114	0.26	7.03	4.76514	7.28717e-44	8.38011e-44	XP_022898487.1|5.7e-224|PI-PLC X domain-containing protein At5g67130-like [Olea europaea var. sylvestris]	GO:0071704//organic substance metabolic process;GO:0006629//lipid metabolic process;GO:0044238//primary metabolic process;GO:0008152//metabolic process;GO:0003824//catalytic activity;GO:0042578//phosphoric ester hydrolase activity;GO:0016788//hydrolase activity, acting on ester bonds;GO:0016787//hydrolase activity;GO:0008081//phosphoric diester hydrolase activity;
evm.model.Contig112.116	7.055	22.96	1.64146	3.133e-28	4.73555e-28	XP_022898490.1|1.9e-83|thioredoxin M3, chloroplastic-like isoform X2 [Olea europaea var. sylvestris]	GO:0071704//organic substance metabolic process;GO:0018904//ether metabolic process;GO:0009987//cellular process;GO:0050794//regulation of cellular process;GO:0045454//cell redox homeostasis;GO:0050789//regulation of biological process;GO:0019725//cellular homeostasis;GO:0044281//small molecule metabolic process;GO:0006662//glycerol ether metabolic process;GO:0065008//regulation of biological qua…	K03671//thioredoxin 1;K03671//thioredoxin 1;K03671//thioredoxin 1
evm.model.Contig112.117	13.115	30.7	1.26572	1.43055e-64	1.2652e-64	XP_022898494.1|5.8e-219|ABSCISIC ACID-INSENSITIVE 5-like protein 5 isoform X2 [Olea europaea var. sylvestris]		K14432//ABA responsive element binding factor+ko04075//Plant hormone signal transduction;K14432//ABA responsive element binding factor+ko04075//Plant hormone signal transduction
evm.model.Contig112.122	10.94	22.67	1.07224	5.84493e-47	6.4179e-47	XP_022899521.1|3.3e-256|glycoprotein 3-alpha-L-fucosyltransferase A-like [Olea europaea var. sylvestris]	GO:1901135//carbohydrate derivative metabolic process;GO:0043412//macromolecule modification;GO:0009987//cellular process;GO:1901566//organonitrogen compound biosynthetic process;GO:0006464//cellular protein modification process;GO:0043170//macromolecule metabolic process;GO:0008152//metabolic process;GO:0009058//biosynthetic process;GO:0034645//cellular macromolecule biosynthetic process;GO:0044…	K00753//glycoprotein 3-alpha-L-fucosyltransferase [EC:2.4.1.214]+ko01100//Metabolic pathways;K00753//glycoprotein 3-alpha-L-fucosyltransferase [EC:2.4.1.214]+ko01100//Metabolic pathways
evm.model.Contig112.131	15.535	139.62	3.21909	0	0	XP_022899522.1|6.0e-268|uncharacterized protein LOC111412886 [Olea europaea var. sylvestris]	GO:0044267//cellular protein metabolic process;GO:0008152//metabolic process;GO:0030163//protein catabolic process;GO:0043170//macromolecule metabolic process;GO:0044265//cellular macromolecule catabolic process;GO:0009056//catabolic process;GO:0006807//nitrogen compound metabolic process;GO:0019538//protein metabolic process;GO:1901565//organonitrogen compound catabolic process;GO:0044238//prima…	K16297//serine carboxypeptidase-like clade II [EC:3.4.16.-];K16297//serine carboxypeptidase-like clade II [EC:3.4.16.-]
evm.model.Contig112.133	0.24	7.815	5.65135	3.78394e-59	3.54662e-59	XP_022897864.1|6.2e-157|uncharacterized protein LOC111411591 [Olea europaea var. sylvestris]		K19042//E3 ubiquitin-protein ligase BOI and related proteins [EC:2.3.2.27]
evm.model.Contig112.14	2.25	11.905	2.40701	1.27677e-52	1.29892e-52	XP_022876352.1|3.1e-232|uncharacterized protein LOC111394661 [Olea europaea var. sylvestris]		K04422//mitogen-activated protein kinase kinase kinase 13 [EC:2.7.11.25]
evm.model.Contig112.144	6.875	24.315	1.82485	1.39033e-53	1.39862e-53	PIN08289.1|1.5e-167|Iron/ascorbate family oxidoreductase [Handroanthus impetiginosus]	GO:0045486//naringenin 3-dioxygenase activity;GO:0003824//catalytic activity;GO:0043167//ion binding;GO:0051213//dioxygenase activity;GO:0016491//oxidoreductase activity;GO:0046872//metal ion binding;GO:0043169//cation binding;GO:0005488//binding;GO:0016705//oxidoreductase activity, acting on paired donors, with incorporation or reduction of molecular oxygen;GO:0016706//oxidoreductase activity, a…	K05278//flavonol synthase [EC:1.14.20.6]+ko01100//Metabolic pathways+ko01110//Biosynthesis of secondary metabolites+ko00941//Flavonoid biosynthesis;K05282//gibberellin-44 dioxygenase [EC:1.14.11.12]+ko00904//Diterpenoid biosynthesis+ko01100//Metabolic pathways+ko01110//Biosynthesis of secondary metabolites
evm.model.Contig112.147	49.75	198.985	2.00452	1.85452e-239	5.12339e-240	XP_022864209.1|1.5e-100|CCG-binding protein 1-like [Olea europaea var. sylvestris]	GO:0048868//pollen tube development;GO:0009856//pollination;GO:0010183//pollen tube guidance;GO:0048856//anatomical structure development;GO:0051704//multi-organism process;GO:0009605//response to external stimulus;GO:0042330//taxis;GO:0006935//chemotaxis;GO:0003006//developmental process involved in reproduction;GO:0050918//positive chemotaxis;GO:0032501//multicellular organismal process;GO:0044…
evm.model.Contig112.24	5.05	13.065	1.37704	1.21326e-20	2.18479e-20	XP_022898445.1|9.4e-194|malate dehydrogenase, glyoxysomal-like [Olea europaea var. sylvestris]	GO:0055114//oxidation-reduction process;GO:0071704//organic substance metabolic process;GO:0006082//organic acid metabolic process;GO:0019752//carboxylic acid metabolic process;GO:0006099//tricarboxylic acid cycle;GO:0006108//malate metabolic process;GO:0043436//oxoacid metabolic process;GO:0044281//small molecule metabolic process;GO:0045333//cellular respiration;GO:0044237//cellular metabolic p…	K00026//malate dehydrogenase [EC:1.1.1.37]+ko00020//Citrate cycle (TCA cycle)+ko01100//Metabolic pathways+ko01110//Biosynthesis of secondary metabolites+ko00710//Carbon fixation in photosynthetic organisms+ko00620//Pyruvate metabolism+ko00270//Cysteine and methionine metabolism+ko01200//Carbon metabolism+ko00630//Glyoxylate and dicarboxylate metabolism
evm.model.Contig112.33	0.055	304.225	12.4408	0	0	XP_022899144.1|2.1e-108|probable 6-phosphogluconolactonase 4, chloroplastic [Olea europaea var. sylvestris]	GO:0044281//small molecule metabolic process;GO:0071704//organic substance metabolic process;GO:0051156//glucose 6-phosphate metabolic process;GO:0034641//cellular nitrogen compound metabolic process;GO:0006098//pentose-phosphate shunt;GO:0006081//cellular aldehyde metabolic process;GO:0005975//carbohydrate metabolic process;GO:0019693//ribose phosphate metabolic process;GO:0006733//oxidoreductio…	K01057//6-phosphogluconolactonase [EC:3.1.1.31]+ko00030//Pentose phosphate pathway+ko01100//Metabolic pathways+ko01110//Biosynthesis of secondary metabolites+ko01200//Carbon metabolism
evm.model.Contig112.44	4.4	10.34	1.23858	1.27908e-37	1.62473e-37	XP_022889154.1|0.0e+00|putative disease resistance protein At3g14460, partial [Olea europaea var. sylvestris]		K19613//leucine-rich repeat protein SHOC2
evm.model.Contig112.65	1.215	3.015	1.31181	1.20602e-14	2.58823e-14	XP_022889154.1|0.0e+00|putative disease resistance protein At3g14460, partial [Olea europaea var. sylvestris]		K19613//leucine-rich repeat protein SHOC2;K19613//leucine-rich repeat protein SHOC2
evm.model.Contig112.66	4.115	13.305	1.71296	2.90571e-22	5.00872e-22	XP_022876339.1|2.7e-16|pre-mRNA-processing protein 40A-like [Olea europaea var. sylvestris]		K12821//pre-mRNA-processing factor 40+ko03040//Spliceosome;K19613//leucine-rich repeat protein SHOC2
evm.model.Contig112.69	2	6.295	1.65678	4.23204e-14	9.22785e-14	XP_022888189.1|2.2e-190|codeine O-demethylase-like [Olea europaea var. sylvestris]	GO:0016491//oxidoreductase activity;GO:0046872//metal ion binding;GO:0043169//cation binding;GO:0043167//ion binding;GO:0003824//catalytic activity;GO:0005488//binding;	K05278//flavonol synthase [EC:1.14.20.6]+ko01100//Metabolic pathways+ko01110//Biosynthesis of secondary metabolites+ko00941//Flavonoid biosynthesis
evm.model.Contig112.72	3.515	8.485	1.29481	2.05652e-48	2.21067e-48	XP_022889157.1|0.0e+00|uncharacterized protein LOC111404604 [Olea europaea var. sylvestris]	GO:1901360//organic cyclic compound metabolic process;GO:0034660//ncRNA metabolic process;GO:0016180//snRNA processing;GO:0010467//gene expression;GO:0009555//pollen development;GO:0034641//cellular nitrogen compound metabolic process;GO:0061458//reproductive system development;GO:0009791//post-embryonic development;GO:0003006//developmental process involved in reproduction;GO:0043170//macromolec…	K13144//integrator complex subunit 7;K13144//integrator complex subunit 7;K13144//integrator complex subunit 7;K13144//integrator complex subunit 7;K13144//integrator complex subunit 7;K13144//integrator complex subunit 7;K13144//integrator complex subunit 7
evm.model.Contig112.77	150.38	414.27	1.45753	0	0	XP_022888193.1|2.7e-140|zinc finger protein ZAT10-like [Olea europaea var. sylvestris]	GO:0003676//nucleic acid binding;GO:0097159//organic cyclic compound binding;GO:1901363//heterocyclic compound binding;GO:0005488//binding;	K22534//PR domain zinc finger protein 5;K05747//Wiskott-Aldrich syndrome protein+ko04144//Endocytosis
evm.model.Contig112.80	0.18	3.39	4.18422	9.70793e-06	3.10769e-05	XP_022889434.1|1.3e-45|uncharacterized protein LOC111404941 [Olea europaea var. sylvestris]
evm.model.Contig112.86	0.045	0.615	3.68172	6.81511e-07	2.02315e-06	XP_022898464.1|0.0e+00|probable indole-3-acetic acid-amido synthetase GH3.1 [Olea europaea var. sylvestris]		K14487//auxin responsive GH3 gene family+ko04075//Plant hormone signal transduction
evm.model.Contig112.89	3.64	21.03	2.53761	1.14186e-107	6.73135e-108	XP_022898465.1|1.1e-296|uncharacterized protein LOC111411984 isoform X1 [Olea europaea var. sylvestris]
evm.model.Contig112.91	2.47	6.75	1.53041	1.95163e-48	2.09762e-48	XP_022898472.1|0.0e+00|DNA repair protein REV1 isoform X5 [Olea europaea var. sylvestris]	GO:0009628//response to abiotic stimulus;GO:0006139//nucleobase-containing compound metabolic process;GO:0009416//response to light stimulus;GO:0044237//cellular metabolic process;GO:0090304//nucleic acid metabolic process;GO:0009314//response to radiation;GO:0006974//cellular response to DNA damage stimulus;GO:0046483//heterocycle metabolic process;GO:0044249//cellular biosynthetic process;GO:00…	K03515//DNA repair protein REV1 [EC:2.7.7.-];K03515//DNA repair protein REV1 [EC:2.7.7.-];K03515//DNA repair protein REV1 [EC:2.7.7.-]
evm.model.Contig112.92	7.135	78.45	3.45602	1.62046e-207	5.17006e-208	AFN85535.1|7.3e-115|PRp27-like protein [Olea europaea subsp. europaea]
evm.model.Contig112.93	6.12	77.33	3.65756	1.82188e-213	5.6707e-214	AFN85535.1|1.5e-120|PRp27-like protein [Olea europaea subsp. europaea]
evm.model.Contig112.94	0.19	1.47	2.93295	2.8454e-05	9.41733e-05	AFN85535.1|7.1e-126|PRp27-like protein [Olea europaea subsp. europaea]
evm.model.Contig112.96	2.865	49.995	4.13276	0	0	XP_022876308.1|2.4e-253|gallate 1-beta-glucosyltransferase-like [Olea europaea var. sylvestris]	GO:0043229//intracellular organelle;GO:0044424//intracellular part;GO:0043226//organelle;GO:0044464//cell part;GO:0005622//intracellular;GO:0043231//intracellular membrane-bounded organelle;GO:0005623//cell;GO:0043227//membrane-bounded organelle;GO:0080044//quercetin 7-O-glucosyltransferase activity;GO:0003824//catalytic activity;GO:0046527//glucosyltransferase activity;GO:0008194//UDP-glycosyltr…	K08236//limonoid glucosyltransferase [EC:2.4.1.210];K13068//sinapate 1-glucosyltransferase [EC:2.4.1.120]+ko00940//Phenylpropanoid biosynthesis
evm.model.Contig113.38	47.965	102.935	1.10821	8.35853e-65	7.37834e-65	XP_022846974.1|7.0e-56|autophagy-related protein 8i-like [Olea europaea var. sylvestris]	GO:0009056//catabolic process;GO:0009987//cellular process;GO:0061919//process utilizing autophagic mechanism;GO:0044248//cellular catabolic process;GO:0008152//metabolic process;GO:0006914//autophagy;GO:0044237//cellular metabolic process;GO:0005737//cytoplasm;GO:0005622//intracellular;GO:0005623//cell;GO:0044424//intracellular part;GO:0044464//cell part;	K08341//GABA(A) receptor-associated protein+ko04136//Autophagy - other;K08341//GABA(A) receptor-associated protein+ko04136//Autophagy - other;K08341//GABA(A) receptor-associated protein+ko04136//Autophagy - other
evm.model.Contig113.45	41.34	144.34	1.80549	2.64082e-211	8.27619e-212	XP_012839320.1|1.4e-122|PREDICTED: tetraspanin-3-like [Erythranthe guttata]	GO:0016020//membrane;GO:0031224//intrinsic component of membrane;GO:0044425//membrane part;GO:0016021//integral component of membrane;	K17345//tetraspanin-5;K17356//tetraspanin-13/31;K01184//polygalacturonase [EC:3.2.1.15]+ko00040//Pentose and glucuronate interconversions+ko01100//Metabolic pathways
evm.model.Contig113.57	22.565	91.68	1.99355	0	0	XP_011089373.1|3.9e-190|mitogen-activated protein kinase 3 [Sesamum indicum]	GO:0009617//response to bacterium;GO:0042742//defense response to bacterium;GO:0065007//biological regulation;GO:0080134//regulation of response to stress;GO:0009628//response to abiotic stimulus;GO:0048583//regulation of response to stimulus;GO:0050832//defense response to fungus;GO:1901000//regulation of response to salt stress;GO:0048518//positive regulation of biological process;GO:0009409//r…	K20536//mitogen-activated protein kinase 3 [EC:2.7.11.24]+ko04016//MAPK signaling pathway - plant;K20536//mitogen-activated protein kinase 3 [EC:2.7.11.24]+ko04016//MAPK signaling pathway - plant;K20536//mitogen-activated protein kinase 3 [EC:2.7.11.24]+ko04016//MAPK signaling pathway - plant
evm.model.Contig113.63	0.865	1.72	1.04299	3.43819e-05	0.000114512	XP_020552605.1|3.6e-129|ethylene-responsive transcription factor RAP2-7 isoform X2 [Sesamum indicum]	GO:0009058//biosynthetic process;GO:0032502//developmental process;GO:0044249//cellular biosynthetic process;GO:0090304//nucleic acid metabolic process;GO:0043170//macromolecule metabolic process;GO:0034641//cellular nitrogen compound metabolic process;GO:0006139//nucleobase-containing compound metabolic process;GO:0009059//macromolecule biosynthetic process;GO:0046483//heterocycle metabolic proc…	K09284//AP2-like factor, euAP2 lineage;K09284//AP2-like factor, euAP2 lineage
evm.model.Contig113.70	0.205	46.85	7.81101	3.60014e-48	3.88374e-48	OIS95677.1|3.2e-06|hypothetical protein A4A49_02838 [Nicotiana attenuata]
evm.model.Contig113.76	0.33	5.29	3.30791	5.2509e-42	6.20532e-42	XP_022883070.1|3.2e-161|probable serine/threonine-protein kinase PBL7 [Olea europaea var. sylvestris]	GO:0005488//binding;GO:0032555//purine ribonucleotide binding;GO:0000166//nucleotide binding;GO:0003824//catalytic activity;GO:0036094//small molecule binding;GO:0043168//anion binding;GO:0016772//transferase activity, transferring phosphorus-containing groups;GO:1901265//nucleoside phosphate binding;GO:0032553//ribonucleotide binding;GO:0008144//drug binding;GO:0035639//purine ribonucleoside tri…	K18873//pathogen-induced protein kinase+ko04626//Plant-pathogen interaction;K04733//interleukin-1 receptor-associated kinase 4 [EC:2.7.11.1];K04733//interleukin-1 receptor-associated kinase 4 [EC:2.7.11.1];K18873//pathogen-induced protein kinase+ko04626//Plant-pathogen interaction;K04733//interleukin-1 receptor-associated kinase 4 [EC:2.7.11.1]
evm.model.Contig113.99	27.065	58.2	1.11366	3.72768e-196	1.25482e-196	XP_022847011.1|0.0e+00|LOW QUALITY PROTEIN: calcium-transporting ATPase 4, endoplasmic reticulum-type-like [Olea europaea var. sylvestris]		K01537//Ca2+-transporting ATPase [EC:3.6.3.8];K01537//Ca2+-transporting ATPase [EC:3.6.3.8]
evm.model.Contig114.127	1.95	3.94	1.03705	1.16314e-10	2.88845e-10	XP_022854142.1|0.0e+00|putative pentatricopeptide repeat-containing protein At1g12700, mitochondrial [Olea europaea var. sylvestris]		K17710//pentatricopeptide repeat domain-containing protein 1;K17964//leucine-rich PPR motif-containing protein, mitochondrial;K17710//pentatricopeptide repeat domain-containing protein 1;K17964//leucine-rich PPR motif-containing protein, mitochondrial
evm.model.Contig114.129	0.195	0.505	1.36525	2.77748e-05	9.18064e-05	XP_022899025.1|0.0e+00|myosin-11-like isoform X2 [Olea europaea var. sylvestris]	GO:0030029//actin filament-based process;GO:0016043//cellular component organization;GO:0007010//cytoskeleton organization;GO:0030036//actin cytoskeleton organization;GO:0071840//cellular component organization or biogenesis;GO:0007015//actin filament organization;GO:0097435//supramolecular fiber organization;GO:0006996//organelle organization;GO:0009987//cellular process;GO:0044446//intracellula…	K10357//myosin V
evm.model.Contig114.141	11.18	25.54	1.11981	9.945e-66	8.68151e-66	XP_022872972.1|0.0e+00|geranylgeranyl transferase type-2 subunit alpha 1-like isoform X1 [Olea europaea var. sylvestris]	GO:0006996//organelle organization;GO:0022607//cellular component assembly;GO:0071826//ribonucleoprotein complex subunit organization;GO:0042254//ribosome biogenesis;GO:0044237//cellular metabolic process;GO:0097354//prenylation;GO:0022613//ribonucleoprotein complex biogenesis;GO:0043412//macromolecule modification;GO:0070925//organelle assembly;GO:0043933//macromolecular complex subunit organiza…	K14050//geranylgeranyl transferase type-2 subunit alpha [EC:2.5.1.60];K14855//ribosome assembly protein 4;K14050//geranylgeranyl transferase type-2 subunit alpha [EC:2.5.1.60];K14050//geranylgeranyl transferase type-2 subunit alpha [EC:2.5.1.60];K14050//geranylgeranyl transferase type-2 subunit alpha [EC:2.5.1.60];K14050//geranylgeranyl transferase type-2 subunit alpha [EC:2.5.1.60];K14855//ribos…
evm.model.Contig114.153	7.08	22.63	1.66137	1.57072e-31	2.22463e-31	XP_022872992.1|1.2e-137|transcription factor MYB14-like [Olea europaea var. sylvestris]	GO:0044424//intracellular part;GO:0005623//cell;GO:0005634//nucleus;GO:0043231//intracellular membrane-bounded organelle;GO:0043226//organelle;GO:0044464//cell part;GO:0043229//intracellular organelle;GO:0005622//intracellular;GO:0043227//membrane-bounded organelle;GO:0003676//nucleic acid binding;GO:0005488//binding;GO:1901363//heterocyclic compound binding;GO:0097159//organic cyclic compound bi…	K09422//transcription factor MYB, plant
evm.model.Contig114.157	1.455	6.58	2.17664	3.16613e-13	7.11266e-13	XP_022898290.1|1.5e-110|TOM1-like protein 2 [Olea europaea var. sylvestris]	GO:0015833//peptide transport;GO:0046907//intracellular transport;GO:0033036//macromolecule localization;GO:0051641//cellular localization;GO:0071702//organic substance transport;GO:0042886//amide transport;GO:0034613//cellular protein localization;GO:0070727//cellular macromolecule localization;GO:0051179//localization;GO:0051234//establishment of localization;GO:0071705//nitrogen compound trans…	K13141//integrator complex subunit 4;K12182//hepatocyte growth factor-regulated tyrosine kinase substrate+ko04144//Endocytosis+ko04145//Phagosome
evm.model.Contig114.181	3.25	11.56	1.8413	5.7809e-39	7.17969e-39	XP_022873643.1|1.4e-288|phospholipase A1-Igamma3, chloroplastic-like [Olea europaea var. sylvestris]	GO:0071704//organic substance metabolic process;GO:0006629//lipid metabolic process;GO:0044238//primary metabolic process;GO:0008152//metabolic process;GO:0016788//hydrolase activity, acting on ester bonds;GO:0004620//phospholipase activity;GO:0052740//1-acyl-2-lysophosphatidylserine acylhydrolase activity;GO:0003824//catalytic activity;GO:0052739//phosphatidylserine 1-acylhydrolase activity;GO:0…	K16818//phospholipase A1 [EC:3.1.1.32]+ko00592//alpha-Linolenic acid metabolism+ko01100//Metabolic pathways+ko01110//Biosynthesis of secondary metabolites+ko00564//Glycerophospholipid metabolism
evm.model.Contig114.197	0.23	1.135	2.37642	6.20768e-12	1.46161e-11	XP_011090138.1|3.1e-177|uncharacterized protein LOC105170906 isoform X1 [Sesamum indicum]
evm.model.Contig114.209	39.205	153.975	1.97705	0	0	XP_022873051.1|4.7e-139|uncharacterized protein At5g02240 [Olea europaea var. sylvestris]	GO:0016616//oxidoreductase activity, acting on the CH-OH group of donors, NAD or NADP as acceptor;GO:0016491//oxidoreductase activity;GO:0003824//catalytic activity;GO:0016614//oxidoreductase activity, acting on CH-OH group of donors;	K08956//AFG3 family protein [EC:3.4.24.-]
evm.model.Contig114.219	0.155	8.5	5.74882	1.63711e-26	2.5608e-26	XP_022899252.1|4.7e-97|uncharacterized protein LOC111412549 [Olea europaea var. sylvestris]	GO:0097747//RNA polymerase activity;GO:0016740//transferase activity;GO:0016772//transferase activity, transferring phosphorus-containing groups;GO:0034062//5'-3' RNA polymerase activity;GO:0003899//DNA-directed 5'-3' RNA polymerase activity;GO:0003824//catalytic activity;GO:0140098//catalytic activity, acting on RNA;GO:0016779//nucleotidyltransferase activity;
evm.model.Contig114.24	1.105	5.005	2.19632	2.72255e-68	2.30428e-68	XP_022854534.1|0.0e+00|mediator of RNA polymerase II transcription subunit 33A-like isoform X1 [Olea europaea var. sylvestris]	GO:0050794//regulation of cellular process;GO:0031323//regulation of cellular metabolic process;GO:2000762//regulation of phenylpropanoid metabolic process;GO:0043455//regulation of secondary metabolic process;GO:0019222//regulation of metabolic process;GO:0050789//regulation of biological process;GO:0065007//biological regulation;GO:0044425//membrane part;GO:0043231//intracellular membrane-bound…
evm.model.Contig114.3	1.035	2.405	1.21291	6.22196e-12	1.46506e-11	XP_022851064.1|0.0e+00|autophagy-related protein 18g [Olea europaea var. sylvestris]		K22991//WD repeat-containing protein 45;K17908//autophagy-related protein 18+ko04136//Autophagy - other;K22991//WD repeat-containing protein 45;K17908//autophagy-related protein 18+ko04136//Autophagy - other
evm.model.Contig114.34	2.94	39.315	3.75323	0	0	XP_022856192.1|1.5e-168|uncharacterized protein LOC111377346 [Olea europaea var. sylvestris]	GO:0009058//biosynthetic process;GO:0008152//metabolic process;GO:0016860//intramolecular oxidoreductase activity;GO:0016853//isomerase activity;GO:0003824//catalytic activity;GO:0016863//intramolecular oxidoreductase activity, transposing C=C bonds;GO:0102943//trans-2,3-dihydro-3-hydroxy-anthranilate isomerase activity;
evm.model.Contig114.35	0.665	29.5	5.49119	3.16911e-204	1.02902e-204	XP_022856192.1|1.1e-105|uncharacterized protein LOC111377346 [Olea europaea var. sylvestris]	GO:0009058//biosynthetic process;GO:0008152//metabolic process;GO:0003824//catalytic activity;
evm.model.Contig114.4	1.48	7.225	2.5119	2.28832e-37	2.91895e-37	XP_022851059.1|3.8e-234|receptor-like cytosolic serine/threonine-protein kinase RBK2 isoform X1 [Olea europaea var. sylvestris]	GO:0032555//purine ribonucleotide binding;GO:0035639//purine ribonucleoside triphosphate binding;GO:1901363//heterocyclic compound binding;GO:0043168//anion binding;GO:0043167//ion binding;GO:0016772//transferase activity, transferring phosphorus-containing groups;GO:0005524//ATP binding;GO:0032559//adenyl ribonucleotide binding;GO:0005488//binding;GO:0016740//transferase activity;GO:0016773//pho…	K04733//interleukin-1 receptor-associated kinase 4 [EC:2.7.11.1];K04733//interleukin-1 receptor-associated kinase 4 [EC:2.7.11.1]
evm.model.Contig114.41	0.925	2.21	1.20296	1.42414e-07	4.08192e-07	XP_011079844.1|1.4e-302|LOW QUALITY PROTEIN: mitochondrial Rho GTPase 1 [Sesamum indicum]	GO:0001101//response to acid chemical;GO:0009987//cellular process;GO:0033993//response to lipid;GO:0097305//response to alcohol;GO:0050896//response to stimulus;GO:0010033//response to organic substance;GO:0007005//mitochondrion organization;GO:0006996//organelle organization;GO:0009719//response to endogenous stimulus;GO:0042221//response to chemical;GO:1901700//response to oxygen-containing co…	K07870//mitochondrial Rho GTPase 1 [EC:3.6.5.-];K07870//mitochondrial Rho GTPase 1 [EC:3.6.5.-]
evm.model.Contig114.48	3.56	10.585	1.57681	3.18778e-12	7.42236e-12	XP_022858812.1|3.8e-42|uncharacterized protein LOC111379628 [Olea europaea var. sylvestris]		K09510//DnaJ homolog subfamily B member 4;K09510//DnaJ homolog subfamily B member 4
evm.model.Contig114.5	2.06	8.24	2.00066	5.62823e-40	6.87999e-40	XP_022851058.1|0.0e+00|probable LRR receptor-like serine/threonine-protein kinase RKF3 [Olea europaea var. sylvestris]	GO:0031224//intrinsic component of membrane;GO:0016021//integral component of membrane;GO:0016020//membrane;GO:0044425//membrane part;GO:0008144//drug binding;GO:0032555//purine ribonucleotide binding;GO:0005488//binding;GO:1901265//nucleoside phosphate binding;GO:0032559//adenyl ribonucleotide binding;GO:0030554//adenyl nucleotide binding;GO:0004674//protein serine/threonine kinase activity;GO:0…	K04733//interleukin-1 receptor-associated kinase 4 [EC:2.7.11.1]
evm.model.Contig114.76	0.275	2.47	3.16324	2.52564e-21	4.46972e-21	PIN04649.1|0.0e+00|Sulfate/bicarbonate/oxalate exchanger SAT-1 and related transporters (SLC26 family) [Handroanthus impetiginosus]	GO:0009536//plastid;GO:0043231//intracellular membrane-bounded organelle;GO:0016020//membrane;GO:0043226//organelle;GO:0016021//integral component of membrane;GO:0005737//cytoplasm;GO:0044464//cell part;GO:0043227//membrane-bounded organelle;GO:0043229//intracellular organelle;GO:0044425//membrane part;GO:0009507//chloroplast;GO:0005622//intracellular;GO:0044444//cytoplasmic part;GO:0044424//intr…	K17471//sulfate transporter 3
evm.model.Contig114.77	1.3	2.885	1.15577	1.27478e-05	4.11293e-05	XP_022899045.1|1.4e-214|uncharacterized protein LOC111412373 [Olea europaea var. sylvestris]	GO:0016491//oxidoreductase activity;GO:0003824//catalytic activity;
evm.model.Contig114.8	2.215	31.68	3.8279	2.41876e-212	7.55071e-213	XP_022851052.1|4.0e-264|sugar transporter ERD6-like 7 isoform X1 [Olea europaea var. sylvestris]	GO:0008643//carbohydrate transport;GO:0051179//localization;GO:0051234//establishment of localization;GO:0071702//organic substance transport;GO:0006810//transport;GO:0044425//membrane part;GO:0016020//membrane;GO:0031224//intrinsic component of membrane;GO:0016021//integral component of membrane;GO:0005215//transporter activity;GO:0022857//transmembrane transporter activity;	K08145//MFS transporter, SP family, solute carrier family 2 (facilitated glucose transporter), member 8
evm.model.Contig115.112	0.09	0.76	3.06116	0.000112454	0.000388854	XP_022883262.1|3.8e-173|peroxidase 5-like [Olea europaea var. sylvestris]	GO:0017144//drug metabolic process;GO:0042743//hydrogen peroxide metabolic process;GO:0044248//cellular catabolic process;GO:0042737//drug catabolic process;GO:0051187//cofactor catabolic process;GO:0044237//cellular metabolic process;GO:0016999//antibiotic metabolic process;GO:0051186//cofactor metabolic process;GO:0009056//catabolic process;GO:0017001//antibiotic catabolic process;GO:0009987//c…	K00430//peroxidase [EC:1.11.1.7]+ko01100//Metabolic pathways+ko01110//Biosynthesis of secondary metabolites+ko00940//Phenylpropanoid biosynthesis
evm.model.Contig115.115	208.8	484.465	1.2089	0	0	XP_022867907.1|4.0e-230|S-adenosylmethionine synthase 5-like [Olea europaea var. sylvestris]	GO:0051188//cofactor biosynthetic process;GO:0044281//small molecule metabolic process;GO:0071704//organic substance metabolic process;GO:1901576//organic substance biosynthetic process;GO:0046500//S-adenosylmethionine metabolic process;GO:0009108//coenzyme biosynthetic process;GO:0009058//biosynthetic process;GO:0044272//sulfur compound biosynthetic process;GO:0009987//cellular process;GO:000679…	K00789//S-adenosylmethionine synthetase [EC:2.5.1.6]+ko01230//Biosynthesis of amino acids+ko01100//Metabolic pathways+ko01110//Biosynthesis of secondary metabolites+ko00270//Cysteine and methionine metabolism
evm.model.Contig115.127	2.5	15.615	2.64209	3.26798e-110	1.88755e-110	XP_022867795.1|0.0e+00|probable receptor-like protein kinase At1g11050 [Olea europaea var. sylvestris]	GO:0031224//intrinsic component of membrane;GO:0044425//membrane part;GO:0016020//membrane;GO:0016021//integral component of membrane;GO:0005524//ATP binding;GO:0016301//kinase activity;GO:0032559//adenyl ribonucleotide binding;GO:0016772//transferase activity, transferring phosphorus-containing groups;GO:0032553//ribonucleotide binding;GO:0035639//purine ribonucleoside triphosphate binding;GO:00…	K04733//interleukin-1 receptor-associated kinase 4 [EC:2.7.11.1]
evm.model.Contig115.18	17.345	38.29	1.14333	2.2649e-45	2.55061e-45	XP_022866027.1|8.2e-206|uncharacterized protein LOC111385833 [Olea europaea var. sylvestris]	GO:0031224//intrinsic component of membrane;GO:0044425//membrane part;GO:0016021//integral component of membrane;GO:0016020//membrane;GO:0046906//tetrapyrrole binding;GO:0048037//cofactor binding;GO:0005488//binding;GO:1901363//heterocyclic compound binding;GO:0020037//heme binding;GO:0097159//organic cyclic compound binding;
evm.model.Contig115.25	0	0.505	4.41869	0.000332524	0.00119769	XP_022866055.1|1.1e-169|nicotianamine synthase-like [Olea europaea var. sylvestris]	GO:0044249//cellular biosynthetic process;GO:1901362//organic cyclic compound biosynthetic process;GO:0042401//cellular biogenic amine biosynthetic process;GO:0009309//amine biosynthetic process;GO:1901566//organonitrogen compound biosynthetic process;GO:0044237//cellular metabolic process;GO:0017144//drug metabolic process;GO:1901564//organonitrogen compound metabolic process;GO:0016053//organic…	K05953//nicotianamine synthase [EC:2.5.1.43]
evm.model.Contig115.28	2	9.88	2.31054	3.0719e-45	3.46692e-45	XP_011092142.1|5.3e-216|peptide chain release factor PrfB2, chloroplastic [Sesamum indicum]	GO:0005622//intracellular;GO:0005737//cytoplasm;GO:0044424//intracellular part;GO:0044464//cell part;GO:0005623//cell;GO:0003747//translation release factor activity;GO:0008079//translation termination factor activity;GO:0003676//nucleic acid binding;GO:0005488//binding;GO:1901363//heterocyclic compound binding;GO:0016149//translation release factor activity, codon specific;GO:0008135//translatio…	K02836//peptide chain release factor 2;K02836//peptide chain release factor 2
evm.model.Contig115.40	3.76	10.76	1.52183	4.68054e-41	5.61497e-41	XP_022867562.1|0.0e+00|scarecrow-like protein 27 isoform X2 [Olea europaea var. sylvestris]		K14494//DELLA protein+ko04075//Plant hormone signal transduction
evm.model.Contig115.64	0	0.975	5.18422	4.55252e-06	1.42604e-05	XP_022867498.1|2.4e-115|B3 domain-containing protein REM10-like isoform X2 [Olea europaea var. sylvestris]	GO:0043227//membrane-bounded organelle;GO:0005623//cell;GO:0005634//nucleus;GO:0005622//intracellular;GO:0043231//intracellular membrane-bounded organelle;GO:0044464//cell part;GO:0044424//intracellular part;GO:0043226//organelle;GO:0043229//intracellular organelle;GO:0003677//DNA binding;GO:0005488//binding;GO:0003676//nucleic acid binding;GO:0097159//organic cyclic compound binding;GO:1901363//…
evm.model.Contig115.8	4.7	14.03	1.65092	1.17502e-36	1.51787e-36	XP_022867265.1|2.5e-237|uncharacterized protein LOC111386986 isoform X1 [Olea europaea var. sylvestris]	GO:0046872//metal ion binding;GO:0043167//ion binding;GO:0008270//zinc ion binding;GO:0005488//binding;GO:0043169//cation binding;GO:0046914//transition metal ion binding;	K16271//E3 ubiquitin-protein ligase RLIM [EC:2.3.2.27];K16271//E3 ubiquitin-protein ligase RLIM [EC:2.3.2.27];K22753//E3 ubiquitin-protein ligase RNF6 [EC:2.3.2.27];K16271//E3 ubiquitin-protein ligase RLIM [EC:2.3.2.27];K22753//E3 ubiquitin-protein ligase RNF6 [EC:2.3.2.27];K16271//E3 ubiquitin-protein ligase RLIM [EC:2.3.2.27];K16271//E3 ubiquitin-protein ligase RLIM [EC:2.3.2.27];K16271//E3 ubi…
evm.model.Contig115.81	0	1.07	5.34469	1.392e-06	4.2189e-06	XP_022897053.1|2.8e-127|mitogen-activated protein kinase kinase kinase 3-like [Olea europaea var. sylvestris]		K04421//mitogen-activated protein kinase kinase kinase 3 [EC:2.7.11.25];K17533//mitogen-activated protein kinase kinase kinase 19 [EC:2.7.11.25];K04445//ribosomal protein S6 kinase alpha-5 [EC:2.7.11.1]
evm.model.Contig116.104	0.415	4.275	3.41869	7.85572e-06	2.49676e-05	XP_022899363.1|8.4e-26|NADP-dependent malic enzyme, chloroplastic-like [Olea europaea var. sylvestris]	GO:0043167//ion binding;GO:0046872//metal ion binding;GO:0005488//binding;GO:0000166//nucleotide binding;GO:0004471//malate dehydrogenase (decarboxylating) (NAD+) activity;GO:0050662//coenzyme binding;GO:0016616//oxidoreductase activity, acting on the CH-OH group of donors, NAD or NADP as acceptor;GO:0036094//small molecule binding;GO:0097159//organic cyclic compound binding;GO:0016614//oxidoredu…	K00029//malate dehydrogenase (oxaloacetate-decarboxylating)(NADP+) [EC:1.1.1.40]+ko01100//Metabolic pathways+ko00710//Carbon fixation in photosynthetic organisms+ko00620//Pyruvate metabolism+ko01200//Carbon metabolism
evm.model.Contig116.110	0	1.105	4.33555	0.000474377	0.00173023	XP_022857806.1|8.0e-68|uncharacterized protein LOC111378789 [Olea europaea var. sylvestris]
evm.model.Contig116.111	0	0.775	6.09676	8.75528e-10	2.25783e-09	KZV28409.1|9.6e-287|calcium-dependent protein kinase 26-like [Dorcoceras hygrometricum]	GO:0003824//catalytic activity;GO:0008144//drug binding;GO:0036094//small molecule binding;GO:0016773//phosphotransferase activity, alcohol group as acceptor;GO:0046872//metal ion binding;GO:0016772//transferase activity, transferring phosphorus-containing groups;GO:0005488//binding;GO:1901363//heterocyclic compound binding;GO:0043169//cation binding;GO:0016740//transferase activity;GO:0043168//a…	K13412//calcium-dependent protein kinase [EC:2.7.11.1]+ko04626//Plant-pathogen interaction
evm.model.Contig116.126	52.96	559.47	3.39314	0	0	XP_022883025.1|3.7e-105|NDR1/HIN1-like protein 1 [Olea europaea var. sylvestris]	GO:0016021//integral component of membrane;GO:0031224//intrinsic component of membrane;GO:0016020//membrane;GO:0044425//membrane part;	K03006//DNA-directed RNA polymerase II subunit RPB1 [EC:2.7.7.6]+ko03020//RNA polymerase;K08360//cytochrome b-561 [EC:7.2.1.3]
evm.model.Contig116.128	0.03	7.545	8.12467	1.13518e-57	1.08358e-57	XP_022889457.1|3.1e-100|uncharacterized protein LOC111404968 [Olea europaea var. sylvestris]
evm.model.Contig116.177	0.365	1.09	1.58576	3.4128e-05	0.000113609	XP_022879354.1|2.0e-127|protein BREAST CANCER SUSCEPTIBILITY 1 homolog isoform X3 [Olea europaea var. sylvestris]	GO:0006259//DNA metabolic process;GO:0050896//response to stimulus;GO:0043170//macromolecule metabolic process;GO:0008152//metabolic process;GO:0071704//organic substance metabolic process;GO:1901360//organic cyclic compound metabolic process;GO:0009987//cellular process;GO:0034641//cellular nitrogen compound metabolic process;GO:0046483//heterocycle metabolic process;GO:0090304//nucleic acid met…	K10683//BRCA1-associated RING domain protein 1+ko03440//Homologous recombination;K10683//BRCA1-associated RING domain protein 1+ko03440//Homologous recombination
evm.model.Contig116.187	2.77	14.81	2.40181	1.43089e-59	1.33458e-59	XP_022882950.1|8.3e-226|myb-related protein 2-like isoform X3 [Olea europaea var. sylvestris]		K06236//collagen, type I, alpha+ko04933//AGE-RAGE signaling pathway in diabetic complications;K14491//two-component response regulator ARR-B family+ko04075//Plant hormone signal transduction;K06236//collagen, type I, alpha+ko04933//AGE-RAGE signaling pathway in diabetic complications
evm.model.Contig116.189	0	1.305	4.55619	0.000177703	0.000624416	XP_022883221.1|4.2e-77|uncharacterized protein LOC111399974 [Olea europaea var. sylvestris]
evm.model.Contig116.33	1.11	2.7	1.28659	2.22279e-10	5.58851e-10	XP_022883048.1|1.1e-214|pentatricopeptide repeat-containing protein At3g42630 isoform X2 [Olea europaea var. sylvestris]	GO:0031325//positive regulation of cellular metabolic process;GO:0010557//positive regulation of macromolecule biosynthetic process;GO:0051247//positive regulation of protein metabolic process;GO:0009451//RNA modification;GO:0006446//regulation of translational initiation;GO:0010628//positive regulation of gene expression;GO:1901360//organic cyclic compound metabolic process;GO:0044238//primary m…	K17710//pentatricopeptide repeat domain-containing protein 1;K17710//pentatricopeptide repeat domain-containing protein 1
evm.model.Contig116.35	6.675	23.64	1.82329	3.29839e-168	1.28419e-168	XP_022883057.1|0.0e+00|auxin response factor 19-like [Olea europaea var. sylvestris]	GO:0051252//regulation of RNA metabolic process;GO:0050789//regulation of biological process;GO:0031323//regulation of cellular metabolic process;GO:0042221//response to chemical;GO:0006355//regulation of transcription, DNA-templated;GO:0032870//cellular response to hormone stimulus;GO:0009734//auxin-activated signaling pathway;GO:0031326//regulation of cellular biosynthetic process;GO:2000112//r…	K14486//auxin response factor+ko04075//Plant hormone signal transduction
evm.model.Contig116.42	0.055	25.625	8.86163	1.85998e-87	1.3119e-87	XP_011020098.1|1.2e-138|PREDICTED: probable xyloglucan endotransglucosylase/hydrolase protein 23 [Populus euphratica]	GO:0044262//cellular carbohydrate metabolic process;GO:0008152//metabolic process;GO:0043170//macromolecule metabolic process;GO:0010410//hemicellulose metabolic process;GO:0010383//cell wall polysaccharide metabolic process;GO:0071840//cellular component organization or biogenesis;GO:0016043//cellular component organization;GO:0005975//carbohydrate metabolic process;GO:0044260//cellular macromol…	K14504//xyloglucan:xyloglucosyl transferase TCH4 [EC:2.4.1.207]+ko04075//Plant hormone signal transduction
evm.model.Contig116.56	3.96	9.895	1.32054	8.92213e-23	1.52077e-22	XP_022857515.1|2.9e-85|dihydrolipoyllysine-residue succinyltransferase component of 2-oxoglutarate dehydrogenase complex 1, mitochondrial-like isoform X2 [Olea europaea var. sylvestris]	GO:0043436//oxoacid metabolic process;GO:0009060//aerobic respiration;GO:0016999//antibiotic metabolic process;GO:0009987//cellular process;GO:0006101//citrate metabolic process;GO:0045333//cellular respiration;GO:0044281//small molecule metabolic process;GO:0015980//energy derivation by oxidation of organic compounds;GO:0071704//organic substance metabolic process;GO:0006091//generation of precu…	K00658//2-oxoglutarate dehydrogenase E2 component (dihydrolipoamide succinyltransferase) [EC:2.3.1.61]+ko00310//Lysine degradation+ko00020//Citrate cycle (TCA cycle)+ko01100//Metabolic pathways+ko01110//Biosynthesis of secondary metabolites+ko01200//Carbon metabolism;K00658//2-oxoglutarate dehydrogenase E2 component (dihydrolipoamide succinyltransferase) [EC:2.3.1.61]+ko00310//Lysine degradation+…
evm.model.Contig116.58	5.43	15.44	1.49886	4.61866e-18	8.90992e-18	XP_011094110.1|2.8e-96|transcription factor bHLH35 [Sesamum indicum]	GO:0046983//protein dimerization activity;GO:0005488//binding;GO:0005515//protein binding;	K18486//heart-and neural crest derivatives-expressed protein 2;K04733//interleukin-1 receptor-associated kinase 4 [EC:2.7.11.1];K13422//transcription factor MYC2+ko04016//MAPK signaling pathway - plant+ko04075//Plant hormone signal transduction
evm.model.Contig117.108	0.45	2.845	2.66369	6.97253e-22	1.21574e-21	XP_011094896.1|1.5e-304|L-type lectin-domain containing receptor kinase S.4 [Sesamum indicum]	GO:0016020//membrane;GO:0044425//membrane part;GO:0031224//intrinsic component of membrane;GO:0016021//integral component of membrane;GO:0008144//drug binding;GO:1901363//heterocyclic compound binding;GO:0000166//nucleotide binding;GO:0003824//catalytic activity;GO:0005488//binding;GO:0017076//purine nucleotide binding;GO:0036094//small molecule binding;GO:0043168//anion binding;GO:0140096//catal…	K04733//interleukin-1 receptor-associated kinase 4 [EC:2.7.11.1]
evm.model.Contig117.111	0.1	0.975	3.30621	5.87176e-09	1.57075e-08	XP_020553486.1|2.5e-297|laccase-17-like [Sesamum indicum]	GO:0019748//secondary metabolic process;GO:0009808//lignin metabolic process;GO:0044237//cellular metabolic process;GO:1901575//organic substance catabolic process;GO:0009698//phenylpropanoid metabolic process;GO:0009056//catabolic process;GO:0044248//cellular catabolic process;GO:0019439//aromatic compound catabolic process;GO:0046274//lignin catabolic process;GO:0006725//cellular aromatic compo…	K05909//laccase [EC:1.10.3.2]
evm.model.Contig117.119	37.01	98.785	1.42068	2.2154e-170	8.53396e-171	XP_022854639.1|3.7e-204|probable serine/threonine-protein kinase PBL11 isoform X1 [Olea europaea var. sylvestris]	GO:0097159//organic cyclic compound binding;GO:0005524//ATP binding;GO:0008144//drug binding;GO:0032555//purine ribonucleotide binding;GO:0140096//catalytic activity, acting on a protein;GO:1901363//heterocyclic compound binding;GO:0016772//transferase activity, transferring phosphorus-containing groups;GO:0017076//purine nucleotide binding;GO:0016301//kinase activity;GO:0000166//nucleotide bindi…	K04733//interleukin-1 receptor-associated kinase 4 [EC:2.7.11.1];K04733//interleukin-1 receptor-associated kinase 4 [EC:2.7.11.1]
evm.model.Contig117.142	52.815	122.085	1.20736	1.07217e-212	3.34537e-213	XP_022887896.1|2.6e-277|uncharacterized protein LOC111403573 [Olea europaea var. sylvestris]	GO:0006970//response to osmotic stress;GO:0042538//hyperosmotic salinity response;GO:0006950//response to stress;GO:0009651//response to salt stress;GO:0006972//hyperosmotic response;GO:0009628//response to abiotic stimulus;GO:0050896//response to stimulus;
evm.model.Contig117.158	0.43	41.05	6.58861	1.05098e-259	2.68027e-260	XP_022887311.1|2.0e-147|LOW QUALITY PROTEIN: WAT1-related protein At2g37460-like [Olea europaea var. sylvestris]	GO:0031224//intrinsic component of membrane;GO:0016020//membrane;GO:0044425//membrane part;GO:0016021//integral component of membrane;GO:0022857//transmembrane transporter activity;GO:0005215//transporter activity;	K17500//integrin-linked kinase-associated serine/threonine phosphatase 2C [EC:3.1.3.16];K17500//integrin-linked kinase-associated serine/threonine phosphatase 2C [EC:3.1.3.16]
evm.model.Contig117.169	4.44	12.805	1.51563	7.23686e-55	7.16558e-55	XP_022846694.1|1.2e-39|serine/arginine-rich splicing factor RS2Z33-like isoform X3 [Olea europaea var. sylvestris]	GO:0031323//regulation of cellular metabolic process;GO:0043170//macromolecule metabolic process;GO:0050789//regulation of biological process;GO:0016070//RNA metabolic process;GO:0000381//regulation of alternative mRNA splicing, via spliceosome;GO:0008152//metabolic process;GO:0043484//regulation of RNA splicing;GO:0019222//regulation of metabolic process;GO:0019219//regulation of nucleobase-cont…	K12896//splicing factor, arginine/serine-rich 7+ko03040//Spliceosome;K12896//splicing factor, arginine/serine-rich 7+ko03040//Spliceosome;K12896//splicing factor, arginine/serine-rich 7+ko03040//Spliceosome;K12896//splicing factor, arginine/serine-rich 7+ko03040//Spliceosome
evm.model.Contig117.31	5.13	12.635	1.3009	8.26085e-19	1.56016e-18	XP_022846589.1|1.5e-191|uncharacterized protein LOC111369341 [Olea europaea var. sylvestris]	GO:0016020//membrane;GO:0016021//integral component of membrane;GO:0031224//intrinsic component of membrane;GO:0044425//membrane part;	K21952//CASK-interacting protein
evm.model.Contig117.36	19.79	56.63	1.51891	2.35113e-225	6.93362e-226	XP_022846583.1|0.0e+00|glutamine--tRNA ligase-like isoform X1 [Olea europaea var. sylvestris]	GO:0043604//amide biosynthetic process;GO:0043038//amino acid activation;GO:0008152//metabolic process;GO:0006520//cellular amino acid metabolic process;GO:0010467//gene expression;GO:0044267//cellular protein metabolic process;GO:0019752//carboxylic acid metabolic process;GO:0032501//multicellular organismal process;GO:1901566//organonitrogen compound biosynthetic process;GO:0006082//organic aci…	K01886//glutaminyl-tRNA synthetase [EC:6.1.1.18]+ko00970//Aminoacyl-tRNA biosynthesis+ko01100//Metabolic pathways
evm.model.Contig117.39	1.915	14.645	3.00288	3.89391e-133	1.90993e-133	XP_022871260.1|9.2e-229|LEAF RUST 10 DISEASE-RESISTANCE LOCUS RECEPTOR-LIKE PROTEIN KINASE-like 2.4 [Olea europaea var. sylvestris]		K04733//interleukin-1 receptor-associated kinase 4 [EC:2.7.11.1];K04733//interleukin-1 receptor-associated kinase 4 [EC:2.7.11.1];K04733//interleukin-1 receptor-associated kinase 4 [EC:2.7.11.1]
evm.model.Contig117.40	1.185	3.44	1.53959	1.01243e-12	2.31632e-12	XP_022871262.1|6.4e-230|LEAF RUST 10 DISEASE-RESISTANCE LOCUS RECEPTOR-LIKE PROTEIN KINASE-like 2.5 [Olea europaea var. sylvestris]		K04733//interleukin-1 receptor-associated kinase 4 [EC:2.7.11.1]
evm.model.Contig117.42	1.125	25.315	4.49558	7.8097e-244	2.12532e-244	XP_022860653.1|5.8e-255|uncharacterized protein LOC111381144 [Olea europaea var. sylvestris]		K04733//interleukin-1 receptor-associated kinase 4 [EC:2.7.11.1]
evm.model.Contig117.43	7.15	54.465	2.96451	0	0	XP_022860653.1|2.2e-243|uncharacterized protein LOC111381144 [Olea europaea var. sylvestris]		K04733//interleukin-1 receptor-associated kinase 4 [EC:2.7.11.1];K04733//interleukin-1 receptor-associated kinase 4 [EC:2.7.11.1];K04733//interleukin-1 receptor-associated kinase 4 [EC:2.7.11.1]
evm.model.Contig117.44	18.975	113.905	2.44324	0	0	XP_020549263.1|7.1e-267|LEAF RUST 10 DISEASE-RESISTANCE LOCUS RECEPTOR-LIKE PROTEIN KINASE-like 1.2 isoform X4 [Sesamum indicum]	GO:0044425//membrane part;GO:0031224//intrinsic component of membrane;GO:0016021//integral component of membrane;GO:0016020//membrane;GO:0016772//transferase activity, transferring phosphorus-containing groups;GO:0005524//ATP binding;GO:0017076//purine nucleotide binding;GO:0097159//organic cyclic compound binding;GO:0000166//nucleotide binding;GO:0035639//purine ribonucleoside triphosphate bindi…	K04733//interleukin-1 receptor-associated kinase 4 [EC:2.7.11.1];K04733//interleukin-1 receptor-associated kinase 4 [EC:2.7.11.1];K04733//interleukin-1 receptor-associated kinase 4 [EC:2.7.11.1];K04733//interleukin-1 receptor-associated kinase 4 [EC:2.7.11.1]
evm.model.Contig117.45	1.13	1.495	2.17181	3.48694e-08	9.67261e-08	XP_022860661.1|8.9e-24|LEAF RUST 10 DISEASE-RESISTANCE LOCUS RECEPTOR-LIKE PROTEIN KINASE-like 2.4 [Olea europaea var. sylvestris]		K04733//interleukin-1 receptor-associated kinase 4 [EC:2.7.11.1];K04733//interleukin-1 receptor-associated kinase 4 [EC:2.7.11.1]
evm.model.Contig117.46	0	0.72	4.55619	0.000177703	0.000624416	XP_022846615.1|1.2e-118|LEAF RUST 10 DISEASE-RESISTANCE LOCUS RECEPTOR-LIKE PROTEIN KINASE-like 2.1 [Olea europaea var. sylvestris]		K04733//interleukin-1 receptor-associated kinase 4 [EC:2.7.11.1]
evm.model.Contig117.54	17.015	39.75	1.21027	7.53703e-53	7.64821e-53	XP_011070767.1|3.7e-180|uncharacterized protein LOC105156355 isoform X1 [Sesamum indicum]	GO:0008152//metabolic process;GO:0009058//biosynthetic process;GO:0003824//catalytic activity;
evm.model.Contig117.55	10.39	22.625	1.12063	8.28912e-50	8.74704e-50	XP_022887369.1|0.0e+00|uncharacterized protein LOC111403195 [Olea europaea var. sylvestris]		K04422//mitogen-activated protein kinase kinase kinase 13 [EC:2.7.11.25]
evm.model.Contig117.58	38.825	119.75	1.62477	1.07401e-100	6.69894e-101	XP_022887379.1|8.7e-95|uncharacterized protein LOC111403202 [Olea europaea var. sylvestris]
evm.model.Contig117.62	3.22	7.145	1.15334	5.33149e-07	1.57343e-06	XP_022865297.1|3.7e-117|ACD11 homolog protein-like [Olea europaea var. sylvestris]	GO:0005737//cytoplasm;GO:0044464//cell part;GO:0005622//intracellular;GO:0005623//cell;GO:0044424//intracellular part;GO:0005319//lipid transporter activity;GO:0120013//intermembrane lipid transfer activity;GO:0005215//transporter activity;	K08051//pleckstrin homology domain containing family A member 8
evm.model.Contig117.64	0	0.455	4.90412	2.78129e-05	9.19836e-05	XP_022865304.1|2.9e-222|uncharacterized protein LOC111385161 [Olea europaea var. sylvestris]		K19476//vacuolar protein sorting-associated protein IST1+ko04144//Endocytosis
evm.model.Contig117.7	0	3.155	6.52303	2.4692e-12	5.72283e-12	XP_022857162.1|5.1e-116|cysteine-rich repeat secretory protein 12-like [Olea europaea var. sylvestris]	GO:0044425//membrane part;GO:0031224//intrinsic component of membrane;GO:0016021//integral component of membrane;GO:0016020//membrane;	K04733//interleukin-1 receptor-associated kinase 4 [EC:2.7.11.1]
evm.model.Contig117.74	1.255	174.605	7.1161	0	0	NP_001343409.1|1.1e-34|putative 18.5 kDa class I heat shock protein [Glycine max]	GO:0016043//cellular component organization;GO:0006457//protein folding;GO:0042542//response to hydrogen peroxide;GO:0043933//macromolecular complex subunit organization;GO:0050896//response to stimulus;GO:0009628//response to abiotic stimulus;GO:0006970//response to osmotic stress;GO:0022607//cellular component assembly;GO:0000302//response to reactive oxygen species;GO:0009408//response to heat…	K13993//HSP20 family protein+ko04141//Protein processing in endoplasmic reticulum
evm.model.Contig117.8	2.35	24.915	3.39444	2.34853e-13	5.25331e-13	XP_022887403.1|9.6e-26|uncharacterized protein LOC111403218 [Olea europaea var. sylvestris]
evm.model.Contig117.88	8.935	23.64	1.41042	5.7322e-25	9.29667e-25	XP_022846627.1|1.8e-127|probable DEAD-box ATP-dependent RNA helicase 48 [Olea europaea var. sylvestris]	GO:0016462//pyrophosphatase activity;GO:0004386//helicase activity;GO:0016817//hydrolase activity, acting on acid anhydrides;GO:0017111//nucleoside-triphosphatase activity;GO:0016818//hydrolase activity, acting on acid anhydrides, in phosphorus-containing anhydrides;GO:0003824//catalytic activity;GO:0016787//hydrolase activity;	K17679//ATP-dependent RNA helicase MSS116, mitochondrial [EC:3.6.4.13]
evm.model.Contig117.93	6.79	30.655	2.17795	2.90296e-218	8.8449e-219	XP_022846630.1|3.4e-235|putative receptor protein kinase ZmPK1 [Olea europaea var. sylvestris]	GO:0044267//cellular protein metabolic process;GO:0022414//reproductive process;GO:0071704//organic substance metabolic process;GO:0009875//pollen-pistil interaction;GO:0048544//recognition of pollen;GO:0032501//multicellular organismal process;GO:0044706//multi-multicellular organism process;GO:0043412//macromolecule modification;GO:0006464//cellular protein modification process;GO:0016310//phos…	K04733//interleukin-1 receptor-associated kinase 4 [EC:2.7.11.1];K04733//interleukin-1 receptor-associated kinase 4 [EC:2.7.11.1];K04733//interleukin-1 receptor-associated kinase 4 [EC:2.7.11.1]
evm.model.Contig118.13	0.175	8.455	5.61133	9.25961e-80	6.95271e-80	XP_022865494.1|8.3e-301|adenine/guanine permease AZG1-like [Olea europaea var. sylvestris]	GO:0016020//membrane;GO:0044425//membrane part;GO:0031224//intrinsic component of membrane;GO:0016021//integral component of membrane;GO:0005345//purine nucleobase transmembrane transporter activity;GO:0005215//transporter activity;GO:0015205//nucleobase transmembrane transporter activity;GO:0022857//transmembrane transporter activity;	K06901//putative MFS transporter, AGZA family, xanthine/uracil permease
evm.model.Contig118.20	0.07	11.975	7.35415	5.90027e-37	7.58038e-37	XP_022872386.1|2.0e-114|LOB domain-containing protein 15 [Olea europaea var. sylvestris]		K21994//LOB domain-containing protein 18;K13944//LOB domain-containing protein 16
evm.model.Contig118.24	0.07	0.96	3.72125	1.2279e-09	3.18473e-09	XP_022872384.1|7.9e-307|protein NRT1/ PTR FAMILY 5.1-like [Olea europaea var. sylvestris]	GO:0044425//membrane part;GO:0016021//integral component of membrane;GO:0016020//membrane;GO:0031224//intrinsic component of membrane;GO:0022857//transmembrane transporter activity;GO:0005215//transporter activity;	K14638//solute carrier family 15 (peptide/histidine transporter), member 3/4
evm.model.Contig118.34	0.25	8.45	5.11913	1.20806e-17	2.36075e-17	XP_022860264.1|6.0e-62|protein LURP-one-related 14-like [Olea europaea var. sylvestris]		K15285//solute carrier family 35, member E3
evm.model.Contig118.42	44.42	352.835	2.98074	0	0	XP_022887158.1|6.1e-78|wound-induced protein 1-like [Olea europaea var. sylvestris]
evm.model.Contig118.5	1.68	6.285	1.90412	9.42344e-20	1.7361e-19	XP_022851936.1|4.4e-246|alpha-galactosidase 3-like [Olea europaea var. sylvestris]		K07407//alpha-galactosidase [EC:3.2.1.22]+ko00603//Glycosphingolipid biosynthesis - globo and isoglobo series+ko00600//Sphingolipid metabolism+ko01100//Metabolic pathways+ko00052//Galactose metabolism+ko00561//Glycerolipid metabolism
evm.model.Contig118.70	0.685	3.28	2.27771	5.01517e-39	6.22178e-39	XP_022855955.1|0.0e+00|probable disease resistance protein At4g27220 [Olea europaea var. sylvestris]		K13459//disease resistance protein RPS2+ko04626//Plant-pathogen interaction;K13459//disease resistance protein RPS2+ko04626//Plant-pathogen interaction;K13459//disease resistance protein RPS2+ko04626//Plant-pathogen interaction
evm.model.Contig118.73	0.115	1.185	3.39511	4.31883e-20	7.89201e-20	XP_022855955.1|0.0e+00|probable disease resistance protein At4g27220 [Olea europaea var. sylvestris]		K13459//disease resistance protein RPS2+ko04626//Plant-pathogen interaction
evm.model.Contig118.82	0.875	3.475	1.97829	1.86852e-13	4.16562e-13	XP_022855956.1|6.0e-174|dehydration-responsive element-binding protein 2A-like [Olea europaea var. sylvestris]	GO:1901576//organic substance biosynthetic process;GO:0018130//heterocycle biosynthetic process;GO:0044271//cellular nitrogen compound biosynthetic process;GO:0009987//cellular process;GO:0044249//cellular biosynthetic process;GO:0090304//nucleic acid metabolic process;GO:0006807//nitrogen compound metabolic process;GO:0044238//primary metabolic process;GO:0019438//aromatic compound biosynthetic …	K09286//EREBP-like factor;K09286//EREBP-like factor
evm.model.Contig118.9	2.12	7.495	1.65078	4.67066e-40	5.70303e-40	XP_022857011.1|9.7e-89|magnesium transporter MRS2-I-like isoform X1 [Olea europaea var. sylvestris]	GO:0051234//establishment of localization;GO:0015693//magnesium ion transport;GO:0006812//cation transport;GO:0006811//ion transport;GO:0051179//localization;GO:0070838//divalent metal ion transport;GO:0030001//metal ion transport;GO:0006810//transport;GO:0072511//divalent inorganic cation transport;GO:0044464//cell part;GO:0016021//integral component of membrane;GO:0016020//membrane;GO:0044425//…	K16075//magnesium transporter;K16075//magnesium transporter;K16075//magnesium transporter
evm.model.Contig119.12	0.855	3.035	1.78199	3.33162e-28	5.03883e-28	XP_022855718.1|0.0e+00|histidine kinase 1 isoform X2 [Olea europaea var. sylvestris]	GO:0016020//membrane;GO:0044425//membrane part;GO:0031224//intrinsic component of membrane;GO:0016021//integral component of membrane;GO:0016301//kinase activity;GO:0016775//phosphotransferase activity, nitrogenous group as acceptor;GO:0003824//catalytic activity;GO:0004673//protein histidine kinase activity;GO:0140096//catalytic activity, acting on a protein;GO:0016740//transferase activity;GO:0…	K19691//osomolarity two-component system, sensor histidine kinase NIK1 [EC:2.7.13.3];K14489//arabidopsis histidine kinase 2/3/4 (cytokinin receptor) [EC:2.7.13.3]+ko04075//Plant hormone signal transduction;K14489//arabidopsis histidine kinase 2/3/4 (cytokinin receptor) [EC:2.7.13.3]+ko04075//Plant hormone signal transduction;K14489//arabidopsis histidine kinase 2/3/4 (cytokinin receptor) [EC:2.7.…
evm.model.Contig119.28	6.075	30.04	2.60801	9.88133e-76	7.73359e-76	XP_022885794.1|4.6e-151|isocitrate dehydrogenase [NAD] regulatory subunit 1, mitochondrial-like [Olea europaea var. sylvestris]	GO:0006101//citrate metabolic process;GO:0008152//metabolic process;GO:0006099//tricarboxylic acid cycle;GO:0072350//tricarboxylic acid metabolic process;GO:0009060//aerobic respiration;GO:0016999//antibiotic metabolic process;GO:0044237//cellular metabolic process;GO:0009987//cellular process;GO:0006091//generation of precursor metabolites and energy;GO:0044281//small molecule metabolic process;…	K00030//isocitrate dehydrogenase (NAD+) [EC:1.1.1.41]+ko00020//Citrate cycle (TCA cycle)+ko01230//Biosynthesis of amino acids+ko01100//Metabolic pathways+ko01110//Biosynthesis of secondary metabolites+ko01210//2-Oxocarboxylic acid metabolism+ko01200//Carbon metabolism;K00030//isocitrate dehydrogenase (NAD+) [EC:1.1.1.41]+ko00020//Citrate cycle (TCA cycle)+ko01230//Biosynthesis of amino acids+ko01…
evm.model.Contig119.56	46.51	128.075	1.46245	2.11647e-176	7.86184e-177	XP_022861496.1|5.8e-163|uncharacterized protein LOC111381882 [Olea europaea var. sylvestris]	GO:0016020//membrane;GO:0044425//membrane part;GO:0016021//integral component of membrane;GO:0031224//intrinsic component of membrane;
evm.model.Contig119.67	1.605	12.78	3.00365	1.43476e-35	1.88628e-35	XP_022843918.1|2.8e-123|uncharacterized protein LOC111367333 [Olea europaea var. sylvestris]
evm.model.Contig119.7	18.82	54.025	1.52288	4.90255e-137	2.33949e-137	PIN17240.1|5.2e-201|hypothetical protein CDL12_10119 [Handroanthus impetiginosus]	GO:0005488//binding;GO:0046872//metal ion binding;GO:0043169//cation binding;GO:0043167//ion binding;	K00921//1-phosphatidylinositol-3-phosphate 5-kinase [EC:2.7.1.150]+ko04145//Phagosome+ko01100//Metabolic pathways+ko04070//Phosphatidylinositol signaling system+ko00562//Inositol phosphate metabolism
evm.model.Contig119.85	9.295	21.325	1.19756	1.03221e-18	1.95481e-18	XP_022850962.1|6.6e-133|molybdate transporter 2-like [Olea europaea var. sylvestris]	GO:0016021//integral component of membrane;GO:0031224//intrinsic component of membrane;GO:0044425//membrane part;GO:0016020//membrane;GO:0005215//transporter activity;GO:0022857//transmembrane transporter activity;GO:0015075//ion transmembrane transporter activity;GO:0015098//molybdate ion transmembrane transporter activity;GO:0008509//anion transmembrane transporter activity;GO:0015103//inorgani…
evm.model.Contig119.86	6.905	16.77	1.27733	1.40012e-13	3.10789e-13	XP_022850962.1|4.0e-83|molybdate transporter 2-like [Olea europaea var. sylvestris]	GO:0016021//integral component of membrane;GO:0031224//intrinsic component of membrane;GO:0016020//membrane;GO:0044425//membrane part;GO:0008509//anion transmembrane transporter activity;GO:0005215//transporter activity;GO:0015075//ion transmembrane transporter activity;GO:0022857//transmembrane transporter activity;GO:0015098//molybdate ion transmembrane transporter activity;GO:0015318//inorgani…
evm.model.Contig119.9	13.5	49.725	1.86935	9.91249e-67	8.56529e-67	XP_022861331.1|4.1e-82|ubiquitin-conjugating enzyme E2 28-like isoform X1 [Olea europaea var. sylvestris]	GO:0043168//anion binding;GO:0097159//organic cyclic compound binding;GO:0008144//drug binding;GO:0003824//catalytic activity;GO:0017076//purine nucleotide binding;GO:0036094//small molecule binding;GO:0032553//ribonucleotide binding;GO:0097367//carbohydrate derivative binding;GO:0016740//transferase activity;GO:0030554//adenyl nucleotide binding;GO:1901363//heterocyclic compound binding;GO:00325…	K06689//ubiquitin-conjugating enzyme E2 D [EC:2.3.2.23]+ko04141//Protein processing in endoplasmic reticulum+ko04120//Ubiquitin mediated proteolysis;K06689//ubiquitin-conjugating enzyme E2 D [EC:2.3.2.23]+ko04141//Protein processing in endoplasmic reticulum+ko04120//Ubiquitin mediated proteolysis
evm.model.Contig12.1	5.48	11.115	1.05448	4.69266e-23	7.95058e-23	XP_022890288.1|2.0e-311|protein YLS7 [Olea europaea var. sylvestris]	GO:0031224//intrinsic component of membrane;GO:0044425//membrane part;GO:0016021//integral component of membrane;GO:0016020//membrane;
evm.model.Contig12.101	1.575	2.975	1.04701	2.03369e-11	4.894e-11	XP_022876302.1|0.0e+00|pentatricopeptide repeat-containing protein At5g04780, mitochondrial [Olea europaea var. sylvestris]	GO:0008270//zinc ion binding;GO:0043169//cation binding;GO:0046914//transition metal ion binding;GO:0046872//metal ion binding;GO:0043167//ion binding;GO:0005488//binding;	K22733//magnesium transporter;K22565//COMM domain containing 9;K22733//magnesium transporter;K22565//COMM domain containing 9;K22733//magnesium transporter;K22565//COMM domain containing 9;K22733//magnesium transporter;K22565//COMM domain containing 9
evm.model.Contig12.103	4.175	52.355	3.64179	4.54137e-139	2.13937e-139	XP_022862284.1|8.6e-121|transcription factor SRM1-like [Olea europaea var. sylvestris]	GO:0005622//intracellular;GO:0005634//nucleus;GO:0043227//membrane-bounded organelle;GO:0044424//intracellular part;GO:0005623//cell;GO:0043229//intracellular organelle;GO:0043231//intracellular membrane-bounded organelle;GO:0044464//cell part;GO:0043226//organelle;GO:1901363//heterocyclic compound binding;GO:0097159//organic cyclic compound binding;GO:0005488//binding;GO:0003676//nucleic acid bi…	K08869//aarF domain-containing kinase;K17613//calcineurin-binding protein cabin-1;K05909//laccase [EC:1.10.3.2];K12134//circadian clock associated 1+ko04712//Circadian rhythm - plant
evm.model.Contig12.115	7.085	15.79	1.15688	9.38433e-26	1.49373e-25	XP_011076933.1|1.3e-227|cytochrome c oxidase assembly protein COX15 [Sesamum indicum]	GO:0044249//cellular biosynthetic process;GO:0006783//heme biosynthetic process;GO:1901360//organic cyclic compound metabolic process;GO:0033013//tetrapyrrole metabolic process;GO:0009058//biosynthetic process;GO:0006725//cellular aromatic compound metabolic process;GO:0019438//aromatic compound biosynthetic process;GO:1901576//organic substance biosynthetic process;GO:0046148//pigment biosynthet…	K02259//cytochrome c oxidase assembly protein subunit 15+ko00860//Porphyrin and chlorophyll metabolism+ko01100//Metabolic pathways+ko00190//Oxidative phosphorylation+ko01110//Biosynthesis of secondary metabolites
evm.model.Contig12.124	124.84	401.27	1.68293	1.8023e-205	5.8108e-206	XP_022893145.1|2.3e-33|copper transport protein ATX1-like [Olea europaea var. sylvestris]	GO:0006810//transport;GO:0051234//establishment of localization;GO:0030001//metal ion transport;GO:0051179//localization;GO:0006812//cation transport;GO:0006811//ion transport;GO:0046872//metal ion binding;GO:0005488//binding;GO:0043167//ion binding;GO:0043169//cation binding;	K07213//copper chaperone;K07213//copper chaperone
evm.model.Contig12.130	1.11	3.27	1.55767	1.79444e-27	2.75427e-27	XP_022860438.1|0.0e+00|pleiotropic drug resistance protein 2-like isoform X2 [Olea europaea var. sylvestris]	GO:0031224//intrinsic component of membrane;GO:0005623//cell;GO:0016020//membrane;GO:0016021//integral component of membrane;GO:0044425//membrane part;GO:0017076//purine nucleotide binding;GO:0016887//ATPase activity;GO:0042626//ATPase activity, coupled to transmembrane movement of substances;GO:0008144//drug binding;GO:0015623//iron-chelate-transporting ATPase activity;GO:0015399//primary active…	K05681//ATP-binding cassette, subfamily G (WHITE), member 2+ko02010//ABC transporters
evm.model.Contig12.134	26.59	69.92	1.3587	1.83901e-255	4.75456e-256	PIN06020.1|7.8e-103|hypothetical protein CDL12_21443 [Handroanthus impetiginosus]
evm.model.Contig12.14	1.285	4.295	1.83239	3.03902e-16	6.18443e-16	XP_022862122.1|3.9e-39|N-acetyltransferase 9-like protein isoform X2 [Olea europaea var. sylvestris]	GO:0016740//transferase activity;GO:0003824//catalytic activity;GO:0016410//N-acyltransferase activity;GO:0016747//transferase activity, transferring acyl groups other than amino-acyl groups;GO:0016407//acetyltransferase activity;GO:0016746//transferase activity, transferring acyl groups;GO:0008080//N-acetyltransferase activity;
evm.model.Contig12.141	12.38	39.38	1.66551	2.39093e-128	1.22168e-128	XP_022893887.1|2.1e-296|uncharacterized protein LOC111408351 [Olea europaea var. sylvestris]		K18081//myotubularin-related protein 1/2 [EC:3.1.3.64 3.1.3.95]+ko01100//Metabolic pathways+ko04070//Phosphatidylinositol signaling system+ko00562//Inositol phosphate metabolism;K12812//ATP-dependent RNA helicase UAP56/SUB2 [EC:3.6.4.13]+ko03040//Spliceosome+ko03015//mRNA surveillance pathway+ko03013//RNA transport;K04733//interleukin-1 receptor-associated kinase 4 [EC:2.7.11.1]
evm.model.Contig12.144	12.905	42.2	1.65109	4.77679e-230	1.37878e-230	XP_022892564.1|0.0e+00|glycosyltransferase family protein 64 protein C5 [Olea europaea var. sylvestris]		K02367//glucuronyl/N-acetylglucosaminyl transferase EXT2 [EC:2.4.1.224 2.4.1.225]+ko01100//Metabolic pathways;K02367//glucuronyl/N-acetylglucosaminyl transferase EXT2 [EC:2.4.1.224 2.4.1.225]+ko01100//Metabolic pathways
evm.model.Contig12.153	2.52	7.39	1.54981	2.03981e-23	3.42885e-23	XP_022892573.1|1.5e-241|uncharacterized protein LOC111407380 [Olea europaea var. sylvestris]
evm.model.Contig12.159	0.09	10.13	6.81101	7.3643e-27	1.14474e-26	XP_009796279.1|9.6e-49|PREDICTED: protein LURP-one-related 10-like [Nicotiana sylvestris]		K15285//solute carrier family 35, member E3
evm.model.Contig12.176	18.18	132.185	2.85848	0	0	XP_022871514.1|0.0e+00|protein NUCLEAR FUSION DEFECTIVE 4-like [Olea europaea var. sylvestris]	GO:0051234//establishment of localization;GO:0051179//localization;GO:0055085//transmembrane transport;GO:0006810//transport;GO:0031224//intrinsic component of membrane;GO:0044425//membrane part;GO:0016021//integral component of membrane;GO:0016020//membrane;	K14794//ribosomal RNA-processing protein 12
evm.model.Contig12.184	5.655	11.61	1.08226	2.96031e-19	5.52487e-19	PIN05990.1|9.1e-224|Serine carboxypeptidases (lysosomal cathepsin A) [Handroanthus impetiginosus]	GO:0004180//carboxypeptidase activity;GO:0016787//hydrolase activity;GO:0070011//peptidase activity, acting on L-amino acid peptides;GO:0008238//exopeptidase activity;GO:0017171//serine hydrolase activity;GO:0070008//serine-type exopeptidase activity;GO:0004185//serine-type carboxypeptidase activity;GO:0140096//catalytic activity, acting on a protein;GO:0003824//catalytic activity;GO:0008236//ser…	K16298//serine carboxypeptidase-like clade IV [EC:3.4.16.-];K16298//serine carboxypeptidase-like clade IV [EC:3.4.16.-];K16298//serine carboxypeptidase-like clade IV [EC:3.4.16.-]
evm.model.Contig12.203	2.345	15.885	2.73799	5.65697e-88	3.96929e-88	XP_022892583.1|5.5e-229|probable serine/threonine-protein kinase PBL19 [Olea europaea var. sylvestris]	GO:0008152//metabolic process;GO:0043412//macromolecule modification;GO:0006464//cellular protein modification process;GO:0043170//macromolecule metabolic process;GO:0044260//cellular macromolecule metabolic process;GO:0050794//regulation of cellular process;GO:1901564//organonitrogen compound metabolic process;GO:0050789//regulation of biological process;GO:0019538//protein metabolic process;GO:…	K04733//interleukin-1 receptor-associated kinase 4 [EC:2.7.11.1];K04733//interleukin-1 receptor-associated kinase 4 [EC:2.7.11.1]
evm.model.Contig12.207	1.375	4.69	1.76555	2.35278e-13	5.26354e-13	XP_022863647.1|6.3e-218|lysM domain receptor-like kinase 3 isoform X1 [Olea europaea var. sylvestris]	GO:0043167//ion binding;GO:0030554//adenyl nucleotide binding;GO:0017076//purine nucleotide binding;GO:0036094//small molecule binding;GO:0003824//catalytic activity;GO:1901265//nucleoside phosphate binding;GO:0016740//transferase activity;GO:0043168//anion binding;GO:0032559//adenyl ribonucleotide binding;GO:0008144//drug binding;GO:0035639//purine ribonucleoside triphosphate binding;GO:1901363/…	K04733//interleukin-1 receptor-associated kinase 4 [EC:2.7.11.1]
evm.model.Contig12.21	4.07	8.83	1.11837	1.7695e-09	4.62408e-09	XP_022848589.1|5.0e-164|isopentenyl-diphosphate Delta-isomerase I-like [Olea europaea var. sylvestris]	GO:0006720//isoprenoid metabolic process;GO:0044237//cellular metabolic process;GO:0044255//cellular lipid metabolic process;GO:0071704//organic substance metabolic process;GO:0044238//primary metabolic process;GO:0008152//metabolic process;GO:0009987//cellular process;GO:0006629//lipid metabolic process;GO:1901576//organic substance biosynthetic process;GO:0008299//isoprenoid biosynthetic proces…	K01823//isopentenyl-diphosphate Delta-isomerase [EC:5.3.3.2]+ko00900//Terpenoid backbone biosynthesis+ko01100//Metabolic pathways+ko01110//Biosynthesis of secondary metabolites;K01823//isopentenyl-diphosphate Delta-isomerase [EC:5.3.3.2]+ko00900//Terpenoid backbone biosynthesis+ko01100//Metabolic pathways+ko01110//Biosynthesis of secondary metabolites
evm.model.Contig12.230	2.405	5.5	1.1963	0.000319165	0.0011466	XP_022892630.1|6.7e-80|CASP-like protein 5B2 [Olea europaea var. sylvestris]	GO:0005886//plasma membrane;GO:0044425//membrane part;GO:0005623//cell;GO:0016021//integral component of membrane;GO:0016020//membrane;GO:0071944//cell periphery;GO:0044464//cell part;GO:0031224//intrinsic component of membrane;
evm.model.Contig12.248	8.22	24.215	1.82483	1.23193e-58	1.16126e-58	XP_022857277.1|8.0e-148|protein GUCD1-like isoform X4 [Olea europaea var. sylvestris]		K03265//peptide chain release factor subunit 1+ko03015//mRNA surveillance pathway;K03265//peptide chain release factor subunit 1+ko03015//mRNA surveillance pathway;K03265//peptide chain release factor subunit 1+ko03015//mRNA surveillance pathway;K03265//peptide chain release factor subunit 1+ko03015//mRNA surveillance pathway;K03265//peptide chain release factor subunit 1+ko03015//mRNA surveillan…
evm.model.Contig12.254	3.84	1290.01	8.39899	0	0	XP_022863521.1|5.7e-82|17.8 kDa class I heat shock protein-like [Olea europaea var. sylvestris]		K13993//HSP20 family protein+ko04141//Protein processing in endoplasmic reticulum
evm.model.Contig12.274	5.91	13.67	1.21409	1.67456e-49	1.77385e-49	XP_011081486.1|0.0e+00|chaperone protein ClpB4, mitochondrial [Sesamum indicum]	GO:0050896//response to stimulus;GO:0071704//organic substance metabolic process;GO:0009987//cellular process;GO:0009266//response to temperature stimulus;GO:0043170//macromolecule metabolic process;GO:0006950//response to stress;GO:0006807//nitrogen compound metabolic process;GO:0009408//response to heat;GO:0019538//protein metabolic process;GO:0008152//metabolic process;GO:0006457//protein fold…	K03695//ATP-dependent Clp protease ATP-binding subunit ClpB
evm.model.Contig12.28	0.35	1.525	2.12054	2.21781e-05	7.28092e-05	XP_022883411.1|8.5e-74|RING-H2 finger protein ATL7-like [Olea europaea var. sylvestris]	GO:0016020//membrane;GO:0016021//integral component of membrane;GO:0044425//membrane part;GO:0031224//intrinsic component of membrane;	K19038//E3 ubiquitin-protein ligase ATL41 [EC:2.3.2.27];K19041//E3 ubiquitin-protein ligase RNF38/44 [EC:2.3.2.27]
evm.model.Contig12.281	2.64	10.59	2.00542	2.70355e-68	2.28778e-68	XP_022892673.1|0.0e+00|cytochrome b561, DM13 and DOMON domain-containing protein At5g54830 [Olea europaea var. sylvestris]	GO:0034622//cellular macromolecular complex assembly;GO:0043933//macromolecular complex subunit organization;GO:0071840//cellular component organization or biogenesis;GO:0055114//oxidation-reduction process;GO:0008152//metabolic process;GO:0065003//macromolecular complex assembly;GO:0017004//cytochrome complex assembly;GO:0044085//cellular component biogenesis;GO:0009987//cellular process;GO:0022…
evm.model.Contig12.286	0.03	1.21	5.34469	3.18706e-11	7.72799e-11	CAN77054.1|1.8e-240|hypothetical protein VITISV_002157 [Vitis vinifera]		K07192//flotillin
evm.model.Contig12.288	23.93	50.595	1.08482	1.18022e-101	7.31093e-102	XP_022865313.1|0.0e+00|uncharacterized protein LOC111385173 [Olea europaea var. sylvestris]		K08770//ubiquitin C;K04523//ubiquilin+ko04141//Protein processing in endoplasmic reticulum
evm.model.Contig12.290	15.51	84.785	2.60925	0	0	XP_022867587.1|1.2e-114|putative protein TPRXL [Olea europaea var. sylvestris]
evm.model.Contig12.3	2.235	5.39	1.26678	7.49925e-31	1.07794e-30	XP_011085404.1|0.0e+00|phytochrome C [Sesamum indicum]	GO:0051716//cellular response to stimulus;GO:0018130//heterocycle biosynthetic process;GO:0044267//cellular protein metabolic process;GO:0019222//regulation of metabolic process;GO:0019219//regulation of nucleobase-containing compound metabolic process;GO:0018298//protein-chromophore linkage;GO:0071482//cellular response to light stimulus;GO:0009987//cellular process;GO:0097659//nucleic acid-temp…	K12120//phytochrome A+ko04712//Circadian rhythm - plant;K12120//phytochrome A+ko04712//Circadian rhythm - plant
evm.model.Contig12.312	11.365	29.4	1.40423	3.17004e-57	3.04e-57	XP_022863806.1|5.2e-189|nucleotide-sugar uncharacterized transporter 3 isoform X1 [Olea europaea var. sylvestris]	GO:0044425//membrane part;GO:0016021//integral component of membrane;GO:0016020//membrane;GO:0031224//intrinsic component of membrane;	K15281//solute carrier family 35;K15281//solute carrier family 35;K15281//solute carrier family 35
evm.model.Contig12.322	9.925	19.375	1.00006	2.24462e-38	2.81724e-38	XP_011070982.1|9.9e-273|putative ATPase N2B isoform X1 [Sesamum indicum]	GO:0005739//mitochondrion;GO:0043229//intracellular organelle;GO:0044444//cytoplasmic part;GO:0043231//intracellular membrane-bounded organelle;GO:0005737//cytoplasm;GO:0043227//membrane-bounded organelle;GO:0005622//intracellular;GO:0044424//intracellular part;GO:0044464//cell part;GO:0005623//cell;GO:0043226//organelle;GO:0016787//hydrolase activity;GO:0016817//hydrolase activity, acting on aci…	K18798//peroxisome-assembly ATPase [EC:3.6.4.7];K18798//peroxisome-assembly ATPase [EC:3.6.4.7];K18798//peroxisome-assembly ATPase [EC:3.6.4.7];K18798//peroxisome-assembly ATPase [EC:3.6.4.7];K18798//peroxisome-assembly ATPase [EC:3.6.4.7];K18798//peroxisome-assembly ATPase [EC:3.6.4.7];K18798//peroxisome-assembly ATPase [EC:3.6.4.7];K18798//peroxisome-assembly ATPase [EC:3.6.4.7];K18798//peroxis…
evm.model.Contig12.324	97.02	359.31	1.89415	1.26895e-233	3.60066e-234	XP_022865516.1|3.3e-64|uncharacterized protein At2g34160-like [Olea europaea var. sylvestris]	GO:1901363//heterocyclic compound binding;GO:0097159//organic cyclic compound binding;GO:0005488//binding;GO:0003676//nucleic acid binding;
evm.model.Contig12.327	24.7	63.02	1.36056	4.92279e-49	5.24364e-49	XP_022892702.1|2.0e-67|uncharacterized protein LOC111407456 isoform X1 [Olea europaea var. sylvestris]
evm.model.Contig12.328	4.35	11.585	1.40226	1.39689e-10	3.48473e-10	XP_022892707.1|6.8e-93|copper transporter 5-like [Olea europaea var. sylvestris]		K14686//solute carrier family 31 (copper transporter), member 1
evm.model.Contig12.33	0	2.775	5.85165	1.40089e-08	3.81664e-08	XP_022855710.1|5.2e-84|zinc finger protein ZAT11-like [Olea europaea var. sylvestris]	GO:0003676//nucleic acid binding;GO:0097159//organic cyclic compound binding;GO:1901363//heterocyclic compound binding;GO:0005488//binding;	K22534//PR domain zinc finger protein 5;K14841//ribosome biogenesis protein NSA1
evm.model.Contig12.333	0.22	12.485	5.81197	1.31966e-27	2.01988e-27	XP_009758838.1|1.1e-72|PREDICTED: 17.3 kDa class II heat shock protein-like [Nicotiana sylvestris]		K13993//HSP20 family protein+ko04141//Protein processing in endoplasmic reticulum
evm.model.Contig12.339	1.055	84.37	6.3027	3.17212e-173	1.20739e-173	XP_009758838.1|1.6e-73|PREDICTED: 17.3 kDa class II heat shock protein-like [Nicotiana sylvestris]		K13993//HSP20 family protein+ko04141//Protein processing in endoplasmic reticulum
evm.model.Contig12.340	13.675	18.97	1.13322	1.45491e-54	1.44702e-54	XP_011081636.1|1.0e-193|probable 28S rRNA (cytosine-C(5))-methyltransferase isoform X1 [Sesamum indicum]	GO:0005488//binding;GO:0003723//RNA binding;GO:0016741//transferase activity, transferring one-carbon groups;GO:0016740//transferase activity;GO:1901363//heterocyclic compound binding;GO:0003676//nucleic acid binding;GO:0008168//methyltransferase activity;GO:0097159//organic cyclic compound binding;GO:0003824//catalytic activity;	K15264//25S rRNA (cytosine2278-C5)-methyltransferase [EC:2.1.1.311];K15264//25S rRNA (cytosine2278-C5)-methyltransferase [EC:2.1.1.311];K15264//25S rRNA (cytosine2278-C5)-methyltransferase [EC:2.1.1.311]
evm.model.Contig12.341	0	2.43	5.41869	7.75884e-07	2.31042e-06	XP_022880504.1|2.0e-63|probable WRKY transcription factor 50 [Olea europaea var. sylvestris]	GO:0044424//intracellular part;GO:0043227//membrane-bounded organelle;GO:0044464//cell part;GO:0043231//intracellular membrane-bounded organelle;GO:0005622//intracellular;GO:0043226//organelle;GO:0043229//intracellular organelle;GO:0005634//nucleus;GO:0005623//cell;GO:0003700//DNA binding transcription factor activity;GO:0097159//organic cyclic compound binding;GO:0005488//binding;GO:0043565//seq…	K13424//WRKY transcription factor 33+ko04016//MAPK signaling pathway - plant+ko04626//Plant-pathogen interaction
evm.model.Contig12.350	1.215	6.895	2.49886	3.05222e-07	8.89065e-07	XP_022892745.1|5.8e-52|uncharacterized protein LOC111407480 [Olea europaea var. sylvestris]	GO:0032559//adenyl ribonucleotide binding;GO:0032553//ribonucleotide binding;GO:0043167//ion binding;GO:0000166//nucleotide binding;GO:0097367//carbohydrate derivative binding;GO:0005524//ATP binding;GO:0035639//purine ribonucleoside triphosphate binding;GO:0097159//organic cyclic compound binding;GO:0017076//purine nucleotide binding;GO:0043168//anion binding;GO:1901265//nucleoside phosphate bin…
evm.model.Contig12.354	0.15	1.375	3.18422	4.85361e-05	0.000163449	CDP08286.1|5.9e-50|unnamed protein product [Coffea canephora]	GO:0044425//membrane part;GO:0016020//membrane;GO:0016021//integral component of membrane;GO:0031224//intrinsic component of membrane;
evm.model.Contig12.357	0	0.73	4.90412	2.78129e-05	9.19836e-05	XP_022892739.1|1.5e-150|heat shock factor protein HSF30-like [Olea europaea var. sylvestris]	GO:1903506//regulation of nucleic acid-templated transcription;GO:0051252//regulation of RNA metabolic process;GO:0065007//biological regulation;GO:0036293//response to decreased oxygen levels;GO:0010035//response to inorganic substance;GO:0009636//response to toxic substance;GO:0010628//positive regulation of gene expression;GO:0046677//response to antibiotic;GO:0051716//cellular response to sti…	K09419//heat shock transcription factor, other eukaryote;K09419//heat shock transcription factor, other eukaryote;K09419//heat shock transcription factor, other eukaryote
evm.model.Contig12.375	7.125	18.035	1.32103	2.30782e-17	4.54091e-17	XP_022845585.1|1.8e-46|uncharacterized protein C6G9.01c isoform X2 [Olea europaea var. sylvestris]
evm.model.Contig12.377	23.595	112.08	2.24903	0	0	XP_022872058.1|2.0e-239|vacuolar-processing enzyme-like [Olea europaea var. sylvestris]	GO:0016787//hydrolase activity;GO:0008233//peptidase activity;GO:0140096//catalytic activity, acting on a protein;GO:0003824//catalytic activity;	K01369//legumain [EC:3.4.22.34]
evm.model.Contig12.385	3.745	7.44	1.17042	6.24852e-13	1.41852e-12	OVA11370.1|1.4e-52|Snf7 [Macleaya cordata]	GO:0051179//localization;GO:0051234//establishment of localization;GO:0007034//vacuolar transport;GO:0006810//transport;GO:0005623//cell;GO:0005622//intracellular;GO:0044464//cell part;	K12194//charged multivesicular body protein 4+ko04144//Endocytosis;K12194//charged multivesicular body protein 4+ko04144//Endocytosis;K12194//charged multivesicular body protein 4+ko04144//Endocytosis;K12194//charged multivesicular body protein 4+ko04144//Endocytosis;K12194//charged multivesicular body protein 4+ko04144//Endocytosis;K12194//charged multivesicular body protein 4+ko04144//Endocytos…
evm.model.Contig12.386	0.07	3.165	5.92965	6.67632e-16	1.37302e-15	XP_022854808.1|6.7e-71|transcription factor MYB46-like [Olea europaea var. sylvestris]	GO:0043229//intracellular organelle;GO:0005622//intracellular;GO:0044424//intracellular part;GO:0005623//cell;GO:0043226//organelle;GO:0043231//intracellular membrane-bounded organelle;GO:0005634//nucleus;GO:0044464//cell part;GO:0043227//membrane-bounded organelle;GO:0003676//nucleic acid binding;GO:0097159//organic cyclic compound binding;GO:0003677//DNA binding;GO:0005488//binding;GO:1901363//…	K09422//transcription factor MYB, plant;K09422//transcription factor MYB, plant
evm.model.Contig12.387	0.49	2.91	2.55619	1.24425e-11	2.96591e-11	XP_022863029.1|3.3e-186|zinc finger CCCH domain-containing protein 20-like [Olea europaea var. sylvestris]	GO:0043169//cation binding;GO:0043167//ion binding;GO:0005488//binding;GO:0046872//metal ion binding;	K23048//RING finger protein unkempt
evm.model.Contig12.398	10.695	38.705	1.85729	6.5879e-121	3.53632e-121	XP_022845790.1|3.1e-256|ATP-dependent 6-phosphofructokinase 6-like [Olea europaea var. sylvestris]	GO:0019637//organophosphate metabolic process;GO:1901135//carbohydrate derivative metabolic process;GO:0008152//metabolic process;GO:0006002//fructose 6-phosphate metabolic process;GO:0006793//phosphorus metabolic process;GO:0071704//organic substance metabolic process;GO:0044237//cellular metabolic process;GO:0009987//cellular process;GO:0006796//phosphate-containing compound metabolic process;G…	K00850//6-phosphofructokinase 1 [EC:2.7.1.11]+ko00010//Glycolysis / Gluconeogenesis+ko00030//Pentose phosphate pathway+ko01230//Biosynthesis of amino acids+ko03018//RNA degradation+ko01100//Metabolic pathways+ko00052//Galactose metabolism+ko00051//Fructose and mannose metabolism+ko01110//Biosynthesis of secondary metabolites+ko01200//Carbon metabolism
evm.model.Contig12.4	9.24	20.97	1.18425	9.16777e-51	9.55657e-51	XP_020555044.1|0.0e+00|putative protein FAR1-RELATED SEQUENCE 10 isoform X2 [Sesamum indicum]	GO:0051252//regulation of RNA metabolic process;GO:0080090//regulation of primary metabolic process;GO:0065007//biological regulation;GO:0050789//regulation of biological process;GO:2000112//regulation of cellular macromolecule biosynthetic process;GO:0019219//regulation of nucleobase-containing compound metabolic process;GO:0060255//regulation of macromolecule metabolic process;GO:0031323//regul…	K17604//zinc finger SWIM domain-containing protein 3
[truncated: 5,411 more rows]

## Sheet: Tabe S6
Table S6 Down-regulated DEGs in R vs YG group
Gene ID	R FPKM	YG FPKM	log2(YG/R)	Q-value(R-vs-YG)	P-value(R-vs-YG)	Nr	GO	Kegg Orthology
BGI_novel_G000004	5.185	1.985	-1.3759	1.02595e-06	3.08375e-06			K17413//small subunit ribosomal protein S35
BGI_novel_G000020	2.155	0.545	-1.98863	1.7474e-19	3.23904e-19
BGI_novel_G000027	2.975	1.16	-1.35972	3.59675e-06	1.11984e-05			K12349//neutral ceramidase [EC:3.5.1.23]+ko00600//Sphingolipid metabolism+ko01100//Metabolic pathways
BGI_novel_G000042	1368.57	1.49	-9.83271	0	0		GO:0050896//response to stimulus;GO:0006952//defense response;GO:0006950//response to stress;
BGI_novel_G000045	2.6	0.7	-1.91198	2.60488e-08	7.18599e-08
[truncated: 8,154 more rows]

## Sheet: Tabe S7
Table S7 Up-regulated DEGs in R vs G group
[truncated: 6,341 more rows]

[truncated: 3 more sheets: Tabe S8, Tabe S9, Tabe S10]
