# Supplementary material for: Biochemical and transcriptomic analyses reveal that critical genes involved in pigment biosynthesis influence leaf color changes in a new sweet osmanthus cultivar ‘Qiannan Guifei’
Source: PeerJ. 2021 Oct 8;9:e12265. doi: 10.7717/peerj.12265 (PMC8504463; doi:10.7717/peerj.12265)
Supplement: Supplemental Information 4 — Table S11 Top 20 enriched GO terms in R vs G group. Table S12 Top 20 enriched GO terms in YG vs G group. Table S13 Top 20 enriched GO terms in R vs YG group. [file peerj-09-12265-s004.xlsx]

## Sheet: Table S11
Table S11 Top 20 enriched GO terms in R vs G group
GO term ID	GO term	Level 1	Level 2	Term candidate gene number	Total candidate gene number	Term gene number	Total gene number	Rich ratio	P-value	Q-value
GO:0003735	structural constituent of ribosome	molecular_function	structural molecule activity	452	10448	683	23999	0.661786	1.06072e-33	5.30572e-30
GO:0005840	ribosome	cellular_component	cell	490	7866	758	17683	0.646438	3.08135e-30	7.70646e-27
GO:0005198	structural molecule activity	molecular_function	structural molecule activity	517	10448	834	23999	0.619904	9.10967e-28	1.51889e-24
GO:0043228	non-membrane-bounded organelle	cellular_component	organelle	868	7866	1503	17683	0.577512	2.77178e-27	2.77289e-24
GO:0043232	intracellular non-membrane-bounded organelle	cellular_component	cell	868	7866	1503	17683	0.577512	2.77178e-27	2.77289e-24
GO:0043604	amide biosynthetic process	biological_process	cellular process	567	6002	945	13502	0.6	1.91202e-23	1.59399e-20
GO:0006518	peptide metabolic process	biological_process	cellular process	563	6002	939	13502	0.599574	3.52688e-23	2.52021e-20
GO:0006412	translation	biological_process	cellular process	536	6002	888	13502	0.603604	5.3637e-23	3.35365e-20
GO:0043043	peptide biosynthetic process	biological_process	cellular process	538	6002	895	13502	0.601117	1.64102e-22	9.12042e-20
GO:0043603	cellular amide metabolic process	biological_process	cellular process	614	6002	1045	13502	0.58756	3.21757e-22	1.60943e-19
GO:1901576	organic substance biosynthetic process	biological_process	metabolic process	1701	6002	3363	13502	0.505798	1.0607e-16	4.8233e-14
GO:0009058	biosynthetic process	biological_process	metabolic process	1784	6002	3547	13502	0.50296	2.30602e-16	9.61227e-14
GO:1990904	ribonucleoprotein complex	cellular_component	macromolecular complex	605	7866	1073	17683	0.56384	4.7895e-16	1.84285e-13
GO:0044249	cellular biosynthetic process	biological_process	cellular process	1647	6002	3259	13502	0.50537	6.83401e-16	2.4417e-13
GO:0044271	cellular nitrogen compound biosynthetic process	biological_process	cellular process	1072	6002	2043	13502	0.524719	1.77286e-15	5.91191e-13
GO:0015631	tubulin binding	molecular_function	binding	134	10448	186	23999	0.72043	2.64608e-15	7.78571e-13
GO:0034645	cellular macromolecule biosynthetic process	biological_process	cellular process	1030	6002	1957	13502	0.526316	2.52527e-15	7.78571e-13
GO:0008017	microtubule binding	molecular_function	binding	118	10448	159	23999	0.742138	3.348e-15	9.30373e-13
GO:1901566	organonitrogen compound biosynthetic process	biological_process	metabolic process	1009	6002	1918	13502	0.526069	6.28066e-15	1.65346e-12
GO:0044391	ribosomal subunit	cellular_component	organelle part	144	7866	202	17683	0.712871	8.42063e-15	2.106e-12

## Sheet: Table S12
Table S12 Top 20 enriched GO terms in YG vs G group
GO term ID	GO term	Level 1	Level 2	Term candidate gene number	Total candidate gene number	Term gene number	Total gene number	Rich ratio	P-value	Q-value
GO:0005840	ribosome	cellular_component	cell	412	5066	758	17683	0.543536	6.00442e-52	2.78545e-48
GO:0003735	structural constituent of ribosome	molecular_function	structural molecule activity	379	6944	683	23999	0.554905	5.68036e-49	1.31756e-45
GO:0005198	structural molecule activity	molecular_function	structural molecule activity	425	6944	834	23999	0.509592	3.41005e-42	5.27308e-39
GO:0006412	translation	biological_process	cellular process	440	3997	888	13502	0.495495	2.77803e-38	3.22182e-35
GO:0043043	peptide biosynthetic process	biological_process	cellular process	442	3997	895	13502	0.493855	5.23215e-38	4.51406e-35
GO:0043604	amide biosynthetic process	biological_process	cellular process	461	3997	945	13502	0.487831	5.83841e-38	4.51406e-35
GO:1990904	ribonucleoprotein complex	cellular_component	macromolecular complex	497	5066	1073	17683	0.463187	6.63191e-37	4.39506e-34
GO:0006518	peptide metabolic process	biological_process	cellular process	451	3997	939	13502	0.480298	5.0093e-35	2.90477e-32
GO:0043603	cellular amide metabolic process	biological_process	cellular process	487	3997	1045	13502	0.466029	1.03059e-33	5.31212e-31
GO:0043228	non-membrane-bounded organelle	cellular_component	organelle	626	5066	1503	17683	0.4165	1.06347e-29	4.48496e-27
GO:0043232	intracellular non-membrane-bounded organelle	cellular_component	cell	626	5066	1503	17683	0.4165	1.06347e-29	4.48496e-27
GO:0044249	cellular biosynthetic process	biological_process	cellular process	1218	3997	3259	13502	0.373734	2.49503e-28	9.64539e-26
GO:0009058	biosynthetic process	biological_process	metabolic process	1304	3997	3547	13502	0.367635	3.97647e-27	1.41899e-24
GO:1901566	organonitrogen compound biosynthetic process	biological_process	metabolic process	771	3997	1918	13502	0.401981	5.36185e-27	1.77669e-24
GO:0044391	ribosomal subunit	cellular_component	organelle part	131	5066	202	17683	0.648515	7.97214e-27	2.31142e-24
GO:1901576	organic substance biosynthetic process	biological_process	metabolic process	1244	3997	3363	13502	0.369908	7.48792e-27	2.31142e-24
GO:0044271	cellular nitrogen compound biosynthetic process	biological_process	cellular process	812	3997	2043	13502	0.397455	1.00049e-26	2.73017e-24
GO:0034645	cellular macromolecule biosynthetic process	biological_process	cellular process	776	3997	1957	13502	0.396525	4.576e-25	1.17934e-22
GO:0009059	macromolecule biosynthetic process	biological_process	metabolic process	783	3997	2009	13502	0.389746	9.91911e-23	2.42183e-20
GO:0044260	cellular macromolecule metabolic process	biological_process	cellular process	1138	3997	3159	13502	0.360241	2.81464e-19	6.52855e-17

## Sheet: Table S13
Table S13 Top 20 enriched GO terms in R vs YG group
GO term ID	GO term	Level 1	Level 2	Term candidate gene number	Total candidate gene number	Term gene number	Total gene number	Rich ratio	P-value	Q-value
GO:0004672	protein kinase activity	molecular_function	catalytic activity	859	7623	2025	23999	0.424198	3.99999e-26	1.80119e-22
GO:0004674	protein serine/threonine kinase activity	molecular_function	catalytic activity	595	7623	1323	23999	0.449735	3.26311e-25	7.34688e-22
GO:0016773	phosphotransferase activity, alcohol group as acceptor	molecular_function	catalytic activity	930	7623	2284	23999	0.40718	1.51434e-21	2.27303e-18
GO:0008017	microtubule binding	molecular_function	binding	106	7623	159	23999	0.666667	1.48209e-19	1.66847e-16
GO:0016301	kinase activity	molecular_function	catalytic activity	1049	7623	2683	23999	0.39098	9.06948e-18	8.16797e-15
GO:0015631	tubulin binding	molecular_function	binding	115	7623	186	23999	0.61828	2.74982e-17	2.03505e-14
GO:0031224	intrinsic component of membrane	cellular_component	membrane part	3195	5715	9081	17683	0.351833	3.16353e-17	2.03505e-14
GO:0016021	integral component of membrane	cellular_component	membrane part	3187	5715	9070	17683	0.351378	1.05902e-16	5.96099e-14
GO:0007017	microtubule-based process	biological_process	cellular process	123	4159	216	13502	0.569444	1.01948e-15	5.10081e-13
GO:0007018	microtubule-based movement	biological_process	cellular process	64	4159	89	13502	0.719101	1.49893e-15	6.74967e-13
GO:0003777	microtubule motor activity	molecular_function	catalytic activity	64	7623	89	23999	0.719101	8.50079e-15	3.47992e-12
GO:0006928	movement of cell or subcellular component	biological_process	cellular process	65	4159	94	13502	0.691489	1.95062e-14	7.31972e-12
GO:0044425	membrane part	cellular_component	membrane part	3274	5715	9477	17683	0.345468	5.27051e-12	1.82562e-09
GO:0016772	transferase activity, transferring phosphorus-containing groups	molecular_function	catalytic activity	1112	7623	2986	23999	0.372405	6.4288e-12	2.06778e-09
GO:0003774	motor activity	molecular_function	catalytic activity	73	7623	117	23999	0.623932	8.84568e-12	2.65547e-09
GO:1990939	ATP-dependent microtubule motor activity	molecular_function	catalytic activity	31	7623	36	23999	0.861111	2.10392e-11	5.92123e-09
GO:0016020	membrane	cellular_component	membrane	3445	5715	10034	17683	0.343333	2.77032e-11	7.33809e-09
GO:0140096	catalytic activity, acting on a protein	molecular_function	catalytic activity	1415	7623	3916	23999	0.361338	1.10152e-10	2.75564e-08
GO:0015630	microtubule cytoskeleton	cellular_component	cell	95	5715	172	17683	0.552326	4.13047e-10	9.78922e-08
GO:0099080	supramolecular complex	cellular_component	supramolecular complex	84	5715	149	17683	0.563758	1.09697e-09	2.14768e-07
