# Supplementary material for: Biochemical and transcriptomic analyses reveal that critical genes involved in pigment biosynthesis influence leaf color changes in a new sweet osmanthus cultivar ‘Qiannan Guifei’
Source: PeerJ. 2021 Oct 8;9:e12265. doi: 10.7717/peerj.12265 (PMC8504463; doi:10.7717/peerj.12265)
Supplement: Supplemental Information 5 — Table S14 Top 20 enriched pathways in R vs YG group. Table S15 Top 20 enriched pathways in R vs G group. Table S16 Top 20 enriched pathways in YG vs G group. [file peerj-09-12265-s005.xlsx]

## Sheet: Table S14
Table S14 Top 20 enriched pathways in R vs YG group
Pathway ID	Pathway name	Level 1	Level 2	Term candidate gene number	Total candidate gene number	Term gene number	Total gene number	Rich ratio	P-value	Q-value
ko04016	MAPK signaling pathway-plant	Environmental Information Processing	Signal transduction	475	6062	1131	19222	0.419982	1.48758e-14	2.06773e-12
ko04626	Plant-pathogen interaction	Organismal Systems	Environmental adaptation	551	6062	1380	19222	0.399275	4.98521e-12	3.46472e-10
ko04075	Plant hormone signal transduction	Environmental Information Processing	Signal transduction	520	6062	1411	19222	0.368533	5.85807e-06	0.000271424
ko00940	Phenylpropanoid biosynthesis	Metabolism	Biosynthesis of other secondary metabolites	279	6062	723	19222	0.385892	2.50706e-05	0.000871202
ko00100	Steroid biosynthesis	Metabolism	Lipid metabolism	46	6062	88	19222	0.522727	4.16361e-05	0.00115748
ko00402	Benzoxazinoid biosynthesis	Metabolism	Biosynthesis of other secondary metabolites	17	6062	25	19222	0.68	0.000194355	0.00385934
ko00906	Carotenoid biosynthesis	Metabolism	Metabolism of terpenoids and polyketides	70	6062	156	19222	0.448718	0.000311571	0.00541355
ko00511	Other glycan degradation	Metabolism	Glycan biosynthesis and metabolism	93	6062	222	19222	0.418919	0.000690893	0.0106705
ko04712	Circadian rhythm-plant	Organismal Systems	Environmental adaptation	153	6062	391	19222	0.391304	0.00079404	0.0110372
ko00061	Fatty acid biosynthesis	Metabolism	Lipid metabolism	60	6062	135	19222	0.444444	0.00107635	0.0136012
ko00460	Cyanoamino acid metabolism	Metabolism	Metabolism of other amino acids	135	6062	346	19222	0.390173	0.00176596	0.0194413
ko00943	Isoflavonoid biosynthesis	Metabolism	Biosynthesis of other secondary metabolites	29	6062	57	19222	0.508772	0.00181825	0.0194413
ko00941	Flavonoid biosynthesis	Metabolism	Biosynthesis of other secondary metabolites	86	6062	210	19222	0.409524	0.0023732	0.0219917
ko04933	AGE-RAGE signaling pathway in diabetic complications	Human Diseases	Endocrine and metabolic diseases	73	6062	174	19222	0.41954	0.00232941	0.0219917
ko00500	Starch and sucrose metabolism	Metabolism	Carbohydrate metabolism	293	6062	814	19222	0.359951	0.00314184	0.0272947
ko00650	Butanoate metabolism	Metabolism	Carbohydrate metabolism	28	6062	59	19222	0.474576	0.00755376	0.0583318
ko00942	Anthocyanin biosynthesis	Metabolism	Biosynthesis of other secondary metabolites	10	6062	16	19222	0.625	0.0104606	0.0765277
ko00062	Fatty acid elongation	Metabolism	Lipid metabolism	62	6062	155	19222	0.4	0.0155252	0.100191
ko00531	Glycosaminoglycan degradation	Metabolism	Glycan biosynthesis and metabolism	44	6062	105	19222	0.419048	0.0158575	0.100191
ko03020	RNA polymerase	Genetic Information Processing	Transcription	111	6062	295	19222	0.376271	0.014633	0.100191

## Sheet: Table S15
Table S15 Top 20 enriched pathways in R vs G group
Pathway ID	Pathway name	Level 1	Level 2	Term candidate gene number	Total candidate gene number	Term gene number	Total gene number	Rich ratio	P-value	Q-value
ko03010	Ribosome	Genetic Information Processing	Translation	622	8428	952	19222	0.653361	1.06901e-42	1.48592e-40
ko03050	Proteasome	Genetic Information Processing	Folding, sorting and degradation	150	8428	253	19222	0.592885	4.8603e-07	3.37791e-05
ko00100	Steroid biosynthesis	Metabolism	Lipid metabolism	52	8428	88	19222	0.590909	0.00280836	0.0875043
ko00511	Other glycan degradation	Metabolism	Glycan biosynthesis and metabolism	118	8428	222	19222	0.531532	0.00314764	0.0875043
ko04016	MAPK signaling pathway - plant	Environmental Information Processing	Signal transduction	541	8428	1131	19222	0.478338	0.00298687	0.0875043
ko00460	Cyanoamino acid metabolism	Metabolism	Metabolism of other amino acids	175	8428	346	19222	0.50578	0.00649591	0.150489
ko01230	Biosynthesis of amino acids	Metabolism	Global and overview maps	404	8428	846	19222	0.477541	0.0106389	0.211259
ko00531	Glycosaminoglycan degradation	Metabolism	Glycan biosynthesis and metabolism	58	8428	105	19222	0.552381	0.0121786	0.211603
ko00600	Sphingolipid metabolism	Metabolism	Lipid metabolism	115	8428	224	19222	0.513393	0.0139552	0.215531
ko00052	Galactose metabolism	Metabolism	Carbohydrate metabolism	194	8428	395	19222	0.491139	0.018961	0.263558
ko00999	Biosynthesis of secondary metabolites-unclassified	Metabolism	Biosynthesis of other secondary metabolites	8	8428	10	19222	0.8	0.0229789	0.29037
ko00061	Fatty acid biosynthesis	Metabolism	Lipid metabolism	70	8428	135	19222	0.518519	0.0368072	0.305003
ko00300	Lysine biosynthesis	Metabolism	Amino acid metabolism	25	8428	43	19222	0.581395	0.041691	0.305003
ko00402	Benzoxazinoid biosynthesis	Metabolism	Biosynthesis of other secondary metabolites	16	8428	25	19222	0.64	0.0339754	0.305003
ko00520	Amino sugar and nucleotide sugar metabolism	Metabolism	Carbohydrate metabolism	246	8428	514	19222	0.478599	0.0350858	0.305003
ko00563	Glycosylphosphatidylinositol (GPI)-anchor biosynthesis	Metabolism	Glycan biosynthesis and metabolism	49	8428	91	19222	0.538462	0.0347451	0.305003
ko00604	Glycosphingolipid biosynthesis-ganglio series	Metabolism	Glycan biosynthesis and metabolism	48	8428	88	19222	0.545455	0.0278742	0.305003
ko00650	Butanoate metabolism	Metabolism	Carbohydrate metabolism	33	8428	59	19222	0.559322	0.0412263	0.305003
ko00942	Anthocyanin biosynthesis	Metabolism	Biosynthesis of other secondary metabolites	11	8428	16	19222	0.6875	0.0397539	0.305003
ko00260	Glycine, serine and threonine metabolism	Metabolism	Amino acid metabolism	101	8428	202	19222	0.5	0.0448667	0.311824

## Sheet: Table 16
Table S16 Top 20 enriched pathways in YG vs G group
Pathway ID	Pathway name	Level 1	Level 2	Term candidate gene number	Total candidate gene number	Term gene number	Total gene number	Rich ratio	P-value	Q-value
ko03010	Ribosome	Genetic Information Processing	Translation	504	5617	952	19222	0.529412	9.85426e-56	1.35989e-53
ko03050	Proteasome	Genetic Information Processing	Folding, sorting and degradation	111	5617	253	19222	0.438735	4.50431e-07	3.10798e-05
ko00052	Galactose metabolism	Metabolism	Carbohydrate metabolism	147	5617	395	19222	0.372152	0.000332511	0.0152955
ko04712	Circadian rhythm - plant	Organismal Systems	Environmental adaptation	140	5617	391	19222	0.358056	0.00263582	0.0909358
ko00261	Monobactam biosynthesis	Metabolism	Biosynthesis of other secondary metabolites	20	5617	42	19222	0.47619	0.00887049	0.244826
ko00520	Amino sugar and nucleotide sugar metabolism	Metabolism	Carbohydrate metabolism	173	5617	514	19222	0.336576	0.0150039	0.258818
ko00600	Sphingolipid metabolism	Metabolism	Lipid metabolism	81	5617	224	19222	0.361607	0.0143034	0.258818
ko01230	Biosynthesis of amino acids	Metabolism	Global and overview maps	277	5617	846	19222	0.327423	0.0123681	0.258818
ko00100	Steroid biosynthesis	Metabolism	Lipid metabolism	35	5617	88	19222	0.397727	0.0216291	0.277927
ko00515	Mannose type O-glycan biosynthesis	Metabolism	Glycan biosynthesis and metabolism	6	5617	9	19222	0.666667	0.0221536	0.277927
ko00910	Nitrogen metabolism	Metabolism	Energy metabolism	46	5617	120	19222	0.383333	0.0196167	0.277927
ko03450	Non-homologous end-joining	Genetic Information Processing	Replication and repair	9	5617	17	19222	0.529412	0.0341467	0.392687
ko00053	Ascorbate and aldarate metabolism	Metabolism	Carbohydrate metabolism	90	5617	265	19222	0.339623	0.0518993	0.422588
ko00300	Lysine biosynthesis	Metabolism	Amino acid metabolism	18	5617	43	19222	0.418605	0.0520579	0.422588
ko00591	Linoleic acid metabolism	Metabolism	Lipid metabolism	18	5617	43	19222	0.418605	0.0520579	0.422588
ko00860	Porphyrin and chlorophyll metabolism	Metabolism	Metabolism of cofactors and vitamins	61	5617	172	19222	0.354651	0.0441389	0.422588
ko00999	Biosynthesis of secondary metabolites-unclassified	Metabolism	Biosynthesis of other secondary metabolites	6	5617	10	19222	0.6	0.0418266	0.422588
ko00460	Cyanoamino acid metabolism	Metabolism	Metabolism of other amino acids	115	5617	346	19222	0.33237	0.0563327	0.431884
ko00942	Anthocyanin biosynthesis	Metabolism	Biosynthesis of other secondary metabolites	8	5617	16	19222	0.5	0.0646315	0.469429
ko00650	Butanoate metabolism	Metabolism	Carbohydrate metabolism	23	5617	59	19222	0.389831	0.068447	0.472285
