# Supplementary material for: Biochemical and transcriptomic analyses reveal that critical genes involved in pigment biosynthesis influence leaf color changes in a new sweet osmanthus cultivar ‘Qiannan Guifei’
Source: PeerJ. 2021 Oct 8;9:e12265. doi: 10.7717/peerj.12265 (PMC8504463; doi:10.7717/peerj.12265)
Supplement: Supplemental Information 6 [file peerj-09-12265-s006.xlsx]

## Sheet: Table S17
Table S17 DEGs involved in chlorophyll metabolism during the leaf color change process
Gene name	Gene ID	R FPKM	YG FPKM	G FPKM	Kegg Orthology	Pathway Name	Level 1	Level 2	Nr	GO
OfHEMA	evm.model.Contig22.288	55.68	112.34	309.93	K02492//glutamyl-tRNA reductase [EC:1.2.1.70]+ko00860//Porphyrin and chlorophyll metabolism+ko01100//Metabolic pathways+ko01110//Biosynthesis of secondary metabolites	ko01100//Metabolic pathways;ko00860//Porphyrin and chlorophyll metabolism;ko01110//Biosynthesis of secondary metabolites	Metabolism	Metabolism of cofactors and vitamins;Global and overview maps	XP_022896190.1|4.7e-285|glutamyl-tRNA reductase 1, chloroplastic-like [Olea europaea var. sylvestris]	GO:0018130//heterocycle biosynthetic process;GO:1901360//organic cyclic compound metabolic process;GO:0071704//organic substance metabolic process;GO:0008152//metabolic process;GO:0044271//cellular nitrogen compound biosynthetic process;GO:0006725//cellular aromatic compound metabolic process;GO:0006783//heme biosynthetic process;GO:0034641//cellular nitrogen compound metabolic process;GO:0051188…
OfHEMB	evm.model.Contig38.113	40.155	51.67	16	K01698//porphobilinogen synthase [EC:4.2.1.24]+ko00860//Porphyrin and chlorophyll metabolism+ko01100//Metabolic pathways+ko01110//Biosynthesis of secondary metabolites;K01698//porphobilinogen synthase [EC:4.2.1.24]+ko00860//Porphyrin and chlorophyll metabolism+ko01100//Metabolic pathways+ko01110//Biosynthesis of secondary metabolites;K01698//porphobilinogen synthase [EC:4.2.1.24]+ko00860//Porphyr…	ko01100//Metabolic pathways;ko01110//Biosynthesis of secondary metabolites;ko00860//Porphyrin and chlorophyll metabolism	Metabolism	Global and overview maps;Metabolism of cofactors and vitamins	XP_022861462.1|1.0e-223|delta-aminolevulinic acid dehydratase 1, chloroplastic isoform X2 [Olea europaea var. sylvestris]	GO:0006779//porphyrin-containing compound biosynthetic process;GO:0051188//cofactor biosynthetic process;GO:0006807//nitrogen compound metabolic process;GO:0009058//biosynthetic process;GO:0044249//cellular biosynthetic process;GO:0033013//tetrapyrrole metabolic process;GO:0018130//heterocycle biosynthetic process;GO:0044237//cellular metabolic process;GO:0034641//cellular nitrogen compound metab…
OfHEMC	evm.model.Contig208.73	99.55	23.325	6.03	K01749//hydroxymethylbilane synthase [EC:2.5.1.61]+ko00860//Porphyrin and chlorophyll metabolism+ko01100//Metabolic pathways+ko01110//Biosynthesis of secondary metabolites	ko01100//Metabolic pathways;ko00860//Porphyrin and chlorophyll metabolism;ko01110//Biosynthesis of secondary metabolites	Metabolism	Global and overview maps;Metabolism of cofactors and vitamins	XP_022892195.1|5.0e-198|porphobilinogen deaminase, chloroplastic [Olea europaea var. sylvestris]	GO:0034641//cellular nitrogen compound metabolic process;GO:1901362//organic cyclic compound biosynthetic process;GO:0044267//cellular protein metabolic process;GO:0018193//peptidyl-amino acid modification;GO:0019438//aromatic compound biosynthetic process;GO:0033013//tetrapyrrole metabolic process;GO:1901360//organic cyclic compound metabolic process;GO:0044238//primary metabolic process;GO:0044…
OfHEMC	evm.model.Contig54.225	72.295	48.11	13.555	K01749//hydroxymethylbilane synthase [EC:2.5.1.61]+ko00860//Porphyrin and chlorophyll metabolism+ko01100//Metabolic pathways+ko01110//Biosynthesis of secondary metabolites;K01749//hydroxymethylbilane synthase [EC:2.5.1.61]+ko00860//Porphyrin and chlorophyll metabolism+ko01100//Metabolic pathways+ko01110//Biosynthesis of secondary metabolites;K01749//hydroxymethylbilane synthase [EC:2.5.1.61]+ko00…	ko01110//Biosynthesis of secondary metabolites;ko01100//Metabolic pathways;ko00860//Porphyrin and chlorophyll metabolism	Metabolism	Global and overview maps;Metabolism of cofactors and vitamins	XP_022892195.1|1.2e-165|porphobilinogen deaminase, chloroplastic [Olea europaea var. sylvestris]	GO:0018160//peptidyl-pyrromethane cofactor linkage;GO:0034641//cellular nitrogen compound metabolic process;GO:0044271//cellular nitrogen compound biosynthetic process;GO:0019438//aromatic compound biosynthetic process;GO:1901576//organic substance biosynthetic process;GO:0044237//cellular metabolic process;GO:0036211//protein modification process;GO:1901566//organonitrogen compound biosynthetic …
OfHEME	evm.model.Contig161.57	49.08	38.895	19.44	K01599//uroporphyrinogen decarboxylase [EC:4.1.1.37]+ko00860//Porphyrin and chlorophyll metabolism+ko01100//Metabolic pathways+ko01110//Biosynthesis of secondary metabolites;K01599//uroporphyrinogen decarboxylase [EC:4.1.1.37]+ko00860//Porphyrin and chlorophyll metabolism+ko01100//Metabolic pathways+ko01110//Biosynthesis of secondary metabolites	ko01100//Metabolic pathways;ko01110//Biosynthesis of secondary metabolites;ko00860//Porphyrin and chlorophyll metabolism	Metabolism	Metabolism of cofactors and vitamins;Global and overview maps	XP_022848491.1|3.3e-230|uroporphyrinogen decarboxylase 1, chloroplastic-like [Olea europaea var. sylvestris]	GO:0046501//protoporphyrinogen IX metabolic process;GO:0051186//cofactor metabolic process;GO:0046483//heterocycle metabolic process;GO:0044271//cellular nitrogen compound biosynthetic process;GO:0044237//cellular metabolic process;GO:0006725//cellular aromatic compound metabolic process;GO:0044249//cellular biosynthetic process;GO:0033013//tetrapyrrole metabolic process;GO:0006779//porphyrin-con…
OfHEME	evm.model.Contig370.45	52.58	28.665	22.22	K01599//uroporphyrinogen decarboxylase [EC:4.1.1.37]+ko00860//Porphyrin and chlorophyll metabolism+ko01100//Metabolic pathways+ko01110//Biosynthesis of secondary metabolites;K01599//uroporphyrinogen decarboxylase [EC:4.1.1.37]+ko00860//Porphyrin and chlorophyll metabolism+ko01100//Metabolic pathways+ko01110//Biosynthesis of secondary metabolites;K01599//uroporphyrinogen decarboxylase [EC:4.1.1.37…	ko00860//Porphyrin and chlorophyll metabolism;ko01110//Biosynthesis of secondary metabolites;ko01100//Metabolic pathways	Metabolism	Global and overview maps;Metabolism of cofactors and vitamins	XP_011084845.1|4.6e-194|uroporphyrinogen decarboxylase [Sesamum indicum]	GO:1901360//organic cyclic compound metabolic process;GO:0008152//metabolic process;GO:1901362//organic cyclic compound biosynthetic process;GO:0046501//protoporphyrinogen IX metabolic process;GO:0044271//cellular nitrogen compound biosynthetic process;GO:0006725//cellular aromatic compound metabolic process;GO:0006807//nitrogen compound metabolic process;GO:1901576//organic substance biosyntheti…
OfHEME	evm.model.Contig52.129	46.075	31.985	20.055	K01599//uroporphyrinogen decarboxylase [EC:4.1.1.37]+ko00860//Porphyrin and chlorophyll metabolism+ko01100//Metabolic pathways+ko01110//Biosynthesis of secondary metabolites	ko00860//Porphyrin and chlorophyll metabolism;ko01100//Metabolic pathways;ko01110//Biosynthesis of secondary metabolites	Metabolism	Metabolism of cofactors and vitamins;Global and overview maps	XP_022848491.1|1.7e-218|uroporphyrinogen decarboxylase 1, chloroplastic-like [Olea europaea var. sylvestris]	GO:0042440//pigment metabolic process;GO:0006783//heme biosynthetic process;GO:0046501//protoporphyrinogen IX metabolic process;GO:0071704//organic substance metabolic process;GO:0006725//cellular aromatic compound metabolic process;GO:0019438//aromatic compound biosynthetic process;GO:1901564//organonitrogen compound metabolic process;GO:0006778//porphyrin-containing compound metabolic process;G…
OfHEMF	evm.model.Contig14.468	226.44	166.665	95.44	K00228//coproporphyrinogen III oxidase [EC:1.3.3.3]+ko00860//Porphyrin and chlorophyll metabolism+ko01100//Metabolic pathways+ko01110//Biosynthesis of secondary metabolites	ko01110//Biosynthesis of secondary metabolites;ko00860//Porphyrin and chlorophyll metabolism;ko01100//Metabolic pathways	Metabolism	Metabolism of cofactors and vitamins;Global and overview maps	XP_022853531.1|8.2e-227|oxygen-dependent coproporphyrinogen-III oxidase, chloroplastic-like [Olea europaea var. sylvestris]	GO:0051186//cofactor metabolic process;GO:0019438//aromatic compound biosynthetic process;GO:0044271//cellular nitrogen compound biosynthetic process;GO:0006778//porphyrin-containing compound metabolic process;GO:1901362//organic cyclic compound biosynthetic process;GO:0033013//tetrapyrrole metabolic process;GO:0006807//nitrogen compound metabolic process;GO:0006779//porphyrin-containing compound…
OfPPO	evm.model.Contig1.384	33.88	14.59	2.125	K02293//15-cis-phytoene desaturase [EC:1.3.5.5]+ko00906//Carotenoid biosynthesis+ko01100//Metabolic pathways+ko01110//Biosynthesis of secondary metabolites;K00231//protoporphyrinogen/coproporphyrinogen III oxidase [EC:1.3.3.4 1.3.3.15]+ko00860//Porphyrin and chlorophyll metabolism+ko01100//Metabolic pathways+ko01110//Biosynthesis of secondary metabolites;K20029//palmitoyltransferase ZDHHC3/7/25 […	ko00906//Carotenoid biosynthesis;ko01110//Biosynthesis of secondary metabolites;ko01100//Metabolic pathways;ko00860//Porphyrin and chlorophyll metabolism	Metabolism	Global and overview maps;Metabolism of cofactors and vitamins;Metabolism of terpenoids and polyketides	XP_022876411.1|2.1e-260|phytoene dehydrogenase, chloroplastic/chromoplastic [Olea europaea var. sylvestris]	GO:0016491//oxidoreductase activity;GO:0003824//catalytic activity;
OfCHLD	evm.model.Contig762.1	78.05	21.2	9.905	K03404//magnesium chelatase subunit D [EC:6.6.1.1]+ko00860//Porphyrin and chlorophyll metabolism+ko01100//Metabolic pathways+ko01110//Biosynthesis of secondary metabolites;K03404//magnesium chelatase subunit D [EC:6.6.1.1]+ko00860//Porphyrin and chlorophyll metabolism+ko01100//Metabolic pathways+ko01110//Biosynthesis of secondary metabolites;K03404//magnesium chelatase subunit D [EC:6.6.1.1]+ko00…	ko01100//Metabolic pathways;ko00860//Porphyrin and chlorophyll metabolism;ko01110//Biosynthesis of secondary metabolites	Metabolism	Global and overview maps;Metabolism of cofactors and vitamins	XP_022884055.1|1.3e-159|magnesium-chelatase subunit ChlD, chloroplastic isoform X1 [Olea europaea var. sylvestris]	GO:0046148//pigment biosynthetic process;GO:0051186//cofactor metabolic process;GO:0033014//tetrapyrrole biosynthetic process;GO:0006725//cellular aromatic compound metabolic process;GO:0015994//chlorophyll metabolic process;GO:0015995//chlorophyll biosynthetic process;GO:0033013//tetrapyrrole metabolic process;GO:0006779//porphyrin-containing compound biosynthetic process;GO:0044249//cellular bi…
OfCHLH	evm.model.Contig167.81	208.02	30.32	77.85	K03403//magnesium chelatase subunit H [EC:6.6.1.1]+ko00860//Porphyrin and chlorophyll metabolism+ko01100//Metabolic pathways+ko01110//Biosynthesis of secondary metabolites	ko01100//Metabolic pathways;ko00860//Porphyrin and chlorophyll metabolism;ko01110//Biosynthesis of secondary metabolites	Metabolism	Metabolism of cofactors and vitamins;Global and overview maps	XP_011075248.1|0.0e+00|magnesium-chelatase subunit ChlH, chloroplastic [Sesamum indicum]	GO:0009058//biosynthetic process;GO:0006725//cellular aromatic compound metabolic process;GO:0051186//cofactor metabolic process;GO:0044237//cellular metabolic process;GO:0033014//tetrapyrrole biosynthetic process;GO:1901566//organonitrogen compound biosynthetic process;GO:0046483//heterocycle metabolic process;GO:0006779//porphyrin-containing compound biosynthetic process;GO:0046148//pigment bio…
OfCHLI	BGI_novel_G002470	0.185	0.04	0.67	K03405//magnesium chelatase subunit I [EC:6.6.1.1]+ko00860//Porphyrin and chlorophyll metabolism+ko01100//Metabolic pathways+ko01110//Biosynthesis of secondary metabolites	ko01110//Biosynthesis of secondary metabolites;ko01100//Metabolic pathways;ko00860//Porphyrin and chlorophyll metabolism	Metabolism	Global and overview maps;Metabolism of cofactors and vitamins
OfDVR	evm.model.Contig561.10	55.42	16.61	38.145	K19073//divinyl chlorophyllide a 8-vinyl-reductase [EC:1.3.1.75]+ko00860//Porphyrin and chlorophyll metabolism+ko01100//Metabolic pathways+ko01110//Biosynthesis of secondary metabolites	ko00860//Porphyrin and chlorophyll metabolism;ko01110//Biosynthesis of secondary metabolites;ko01100//Metabolic pathways	Metabolism	Metabolism of cofactors and vitamins;Global and overview maps	XP_022849239.1|2.0e-194|divinyl chlorophyllide a 8-vinyl-reductase, chloroplastic [Olea europaea var. sylvestris]	GO:0016491//oxidoreductase activity;GO:0016627//oxidoreductase activity, acting on the CH-CH group of donors;GO:0033728//divinyl chlorophyllide a 8-vinyl-reductase activity;GO:0016628//oxidoreductase activity, acting on the CH-CH group of donors, NAD or NADP as acceptor;GO:0003824//catalytic activity;
OfCHLG	evm.model.Contig122.3	29.35	20.15	58.525	K04040//chlorophyll/bacteriochlorophyll a synthase [EC:2.5.1.62 2.5.1.133]+ko00860//Porphyrin and chlorophyll metabolism+ko01100//Metabolic pathways+ko01110//Biosynthesis of secondary metabolites	ko00860//Porphyrin and chlorophyll metabolism;ko01110//Biosynthesis of secondary metabolites;ko01100//Metabolic pathways	Metabolism	Metabolism of cofactors and vitamins;Global and overview maps	XP_022856851.1|1.2e-204|chlorophyll synthase, chloroplastic-like [Olea europaea var. sylvestris]	GO:0006725//cellular aromatic compound metabolic process;GO:0006779//porphyrin-containing compound biosynthetic process;GO:1901360//organic cyclic compound metabolic process;GO:0044249//cellular biosynthetic process;GO:1901362//organic cyclic compound biosynthetic process;GO:0044271//cellular nitrogen compound biosynthetic process;GO:0034641//cellular nitrogen compound metabolic process;GO:001599…
OfCHLG	evm.model.Contig216.66	13.615	12.515	54.22	K04040//chlorophyll/bacteriochlorophyll a synthase [EC:2.5.1.62 2.5.1.133]+ko00860//Porphyrin and chlorophyll metabolism+ko01100//Metabolic pathways+ko01110//Biosynthesis of secondary metabolites;K04040//chlorophyll/bacteriochlorophyll a synthase [EC:2.5.1.62 2.5.1.133]+ko00860//Porphyrin and chlorophyll metabolism+ko01100//Metabolic pathways+ko01110//Biosynthesis of secondary metabolites;K04040/…	ko01100//Metabolic pathways;ko00860//Porphyrin and chlorophyll metabolism;ko01110//Biosynthesis of secondary metabolites	Metabolism	Global and overview maps;Metabolism of cofactors and vitamins	XP_022893535.1|7.3e-166|chlorophyll synthase, chloroplastic [Olea europaea var. sylvestris]	GO:0046148//pigment biosynthetic process;GO:0015995//chlorophyll biosynthetic process;GO:0051186//cofactor metabolic process;GO:1901564//organonitrogen compound metabolic process;GO:1901566//organonitrogen compound biosynthetic process;GO:0071704//organic substance metabolic process;GO:0015994//chlorophyll metabolic process;GO:0033014//tetrapyrrole biosynthetic process;GO:1901362//organic cyclic …
OfCHLG	evm.model.Contig467.16	97.14	77.355	219.74	K04040//chlorophyll/bacteriochlorophyll a synthase [EC:2.5.1.62 2.5.1.133]+ko00860//Porphyrin and chlorophyll metabolism+ko01100//Metabolic pathways+ko01110//Biosynthesis of secondary metabolites;K04040//chlorophyll/bacteriochlorophyll a synthase [EC:2.5.1.62 2.5.1.133]+ko00860//Porphyrin and chlorophyll metabolism+ko01100//Metabolic pathways+ko01110//Biosynthesis of secondary metabolites	ko01110//Biosynthesis of secondary metabolites;ko00860//Porphyrin and chlorophyll metabolism;ko01100//Metabolic pathways	Metabolism	Metabolism of cofactors and vitamins;Global and overview maps	XP_022856851.1|2.8e-209|chlorophyll synthase, chloroplastic-like [Olea europaea var. sylvestris]	GO:0019438//aromatic compound biosynthetic process;GO:0008152//metabolic process;GO:0033013//tetrapyrrole metabolic process;GO:0018130//heterocycle biosynthetic process;GO:0071704//organic substance metabolic process;GO:0015995//chlorophyll biosynthetic process;GO:1901360//organic cyclic compound metabolic process;GO:0006725//cellular aromatic compound metabolic process;GO:0006778//porphyrin-cont…
OfCAO	evm.model.Contig20.181	23.38	3.52	43.085	K13600//chlorophyllide a oxygenase [EC:1.14.13.122]+ko00860//Porphyrin and chlorophyll metabolism+ko01100//Metabolic pathways+ko01110//Biosynthesis of secondary metabolites;K13600//chlorophyllide a oxygenase [EC:1.14.13.122]+ko00860//Porphyrin and chlorophyll metabolism+ko01100//Metabolic pathways+ko01110//Biosynthesis of secondary metabolites	ko01110//Biosynthesis of secondary metabolites;ko00860//Porphyrin and chlorophyll metabolism;ko01100//Metabolic pathways	Metabolism	Global and overview maps;Metabolism of cofactors and vitamins	XP_022875886.1|4.2e-307|chlorophyllide a oxygenase, chloroplastic-like [Olea europaea var. sylvestris]	GO:0046872//metal ion binding;GO:0043167//ion binding;GO:0004497//monooxygenase activity;GO:0048037//cofactor binding;GO:0016703//oxidoreductase activity, acting on single donors with incorporation of molecular oxygen, incorporation of one atom of oxygen (internal monooxygenases or internal mixed function oxidases);GO:0051537//2 iron, 2 sulfur cluster binding;GO:0005506//iron ion binding;GO:00164…
OfCAO	evm.model.Contig477.31	39.345	17.845	52.985	K13600//chlorophyllide a oxygenase [EC:1.14.13.122]+ko00860//Porphyrin and chlorophyll metabolism+ko01100//Metabolic pathways+ko01110//Biosynthesis of secondary metabolites	ko00860//Porphyrin and chlorophyll metabolism;ko01110//Biosynthesis of secondary metabolites;ko01100//Metabolic pathways	Metabolism	Global and overview maps;Metabolism of cofactors and vitamins	XP_022860217.1|1.2e-309|chlorophyllide a oxygenase, chloroplastic-like isoform X1 [Olea europaea var. sylvestris]	GO:0016491//oxidoreductase activity;GO:0046872//metal ion binding;GO:0016703//oxidoreductase activity, acting on single donors with incorporation of molecular oxygen, incorporation of one atom of oxygen (internal monooxygenases or internal mixed function oxidases);GO:0051536//iron-sulfur cluster binding;GO:0048037//cofactor binding;GO:0005506//iron ion binding;GO:0046914//transition metal ion bin…
OfCLH	evm.model.Contig147.35	124.94	391.965	171.21	K08099//chlorophyllase [EC:3.1.1.14]+ko00860//Porphyrin and chlorophyll metabolism+ko01100//Metabolic pathways+ko01110//Biosynthesis of secondary metabolites	ko01100//Metabolic pathways;ko00860//Porphyrin and chlorophyll metabolism;ko01110//Biosynthesis of secondary metabolites	Metabolism	Metabolism of cofactors and vitamins;Global and overview maps	XP_022849598.1|9.3e-177|chlorophyllase-2, chloroplastic [Olea europaea var. sylvestris]	GO:0033015//tetrapyrrole catabolic process;GO:0044237//cellular metabolic process;GO:0006807//nitrogen compound metabolic process;GO:1901361//organic cyclic compound catabolic process;GO:0044248//cellular catabolic process;GO:0042440//pigment metabolic process;GO:0046483//heterocycle metabolic process;GO:0051187//cofactor catabolic process;GO:0019439//aromatic compound catabolic process;GO:004614…
OfMCS	evm.model.Contig45.76	0.99	44.805	0.085	K22013//magnesium dechelatase [EC:4.99.1.10]+ko00860//Porphyrin and chlorophyll metabolism+ko01110//Biosynthesis of secondary metabolites;K22013//magnesium dechelatase [EC:4.99.1.10]+ko00860//Porphyrin and chlorophyll metabolism+ko01110//Biosynthesis of secondary metabolites	ko00860//Porphyrin and chlorophyll metabolism;ko01110//Biosynthesis of secondary metabolites	Metabolism	Global and overview maps;Metabolism of cofactors and vitamins	XP_022858146.1|1.3e-99|protein STAY-GREEN, chloroplastic-like [Olea europaea var. sylvestris]
OfPAO	evm.model.Contig62.40	15.78	139.125	219.49	K13071//pheophorbide a oxygenase [EC:1.14.15.17]+ko00860//Porphyrin and chlorophyll metabolism+ko01110//Biosynthesis of secondary metabolites;K13071//pheophorbide a oxygenase [EC:1.14.15.17]+ko00860//Porphyrin and chlorophyll metabolism+ko01110//Biosynthesis of secondary metabolites	ko00860//Porphyrin and chlorophyll metabolism;ko01110//Biosynthesis of secondary metabolites	Metabolism	Global and overview maps;Metabolism of cofactors and vitamins	PIN04299.1|1.4e-122|Pheophorbide a oxygenase [Handroanthus impetiginosus]	GO:0016491//oxidoreductase activity;GO:0005488//binding;GO:0016701//oxidoreductase activity, acting on single donors with incorporation of molecular oxygen;GO:0016703//oxidoreductase activity, acting on single donors with incorporation of molecular oxygen, incorporation of one atom of oxygen (internal monooxygenases or internal mixed function oxidases);GO:0048037//cofactor binding;GO:0016730//oxi…
OfNOL/NYC	evm.model.Contig145.94	24.595	27.8	120.59	K13606//chlorophyll(ide) b reductase [EC:1.1.1.294]+ko00860//Porphyrin and chlorophyll metabolism+ko01100//Metabolic pathways+ko01110//Biosynthesis of secondary metabolites;K13606//chlorophyll(ide) b reductase [EC:1.1.1.294]+ko00860//Porphyrin and chlorophyll metabolism+ko01100//Metabolic pathways+ko01110//Biosynthesis of secondary metabolites;K13606//chlorophyll(ide) b reductase [EC:1.1.1.294]+k…	ko00860//Porphyrin and chlorophyll metabolism;ko00630//Glyoxylate and dicarboxylate metabolism;ko01110//Biosynthesis of secondary metabolites;ko00910//Nitrogen metabolism;ko01100//Metabolic pathways	Metabolism	Global and overview maps;Energy metabolism;Carbohydrate metabolism;Metabolism of cofactors and vitamins	XP_022893449.1|4.0e-153|probable chlorophyll(ide) b reductase NYC1, chloroplastic isoform X2 [Olea europaea var. sylvestris]	GO:0044425//membrane part;GO:0016020//membrane;GO:0031224//intrinsic component of membrane;GO:0016021//integral component of membrane;GO:1901363//heterocyclic compound binding;GO:0097159//organic cyclic compound binding;GO:0005488//binding;GO:0003676//nucleic acid binding;
