# Supplementary material for: Biochemical and transcriptomic analyses reveal that critical genes involved in pigment biosynthesis influence leaf color changes in a new sweet osmanthus cultivar ‘Qiannan Guifei’
Source: PeerJ. 2021 Oct 8;9:e12265. doi: 10.7717/peerj.12265 (PMC8504463; doi:10.7717/peerj.12265)
Supplement: Supplemental Information 7 [file peerj-09-12265-s007.xlsx]

## Sheet: Table S18
Table S18 DEGs involved in carotenoid biosynthesis during the leaf color change process
Gene name	Gene ID	R FPKM	YG FPKM	G FPKM	Kegg Orthology	Pathway Name	Level 1	Level 2	Nr	GO
OfPSY	evm.model.Contig7.6	52.54	10.565	34.41	K02291//15-cis-phytoene synthase [EC:2.5.1.32]+ko00906//Carotenoid biosynthesis+ko01100//Metabolic pathways+ko01110//Biosynthesis of secondary metabolites	ko01100//Metabolic pathways;ko00906//Carotenoid biosynthesis;ko01110//Biosynthesis of secondary metabolites	Metabolism	Metabolism of terpenoids and polyketides;Global and overview maps	XP_022879717.1|2.4e-231|phytoene synthase 2, chloroplastic [Olea europaea var. sylvestris]	GO:0016125//sterol metabolic process;GO:0071704//organic substance metabolic process;GO:0044107//cellular alcohol metabolic process;GO:0044281//small molecule metabolic process;GO:0006696//ergosterol biosynthetic process;GO:0006629//lipid metabolic process;GO:0044238//primary metabolic process;GO:0044108//cellular alcohol biosynthetic process;GO:0097384//cellular lipid biosynthetic process;GO:190…
OfPDS	evm.model.Contig53.312	22.385	34.335	13.435	K02293//15-cis-phytoene desaturase [EC:1.3.5.5]+ko00906//Carotenoid biosynthesis+ko01100//Metabolic pathways+ko01110//Biosynthesis of secondary metabolites	ko01100//Metabolic pathways;ko01110//Biosynthesis of secondary metabolites;ko00906//Carotenoid biosynthesis	Metabolism	Metabolism of terpenoids and polyketides;Global and overview maps	KZV46264.1|6.2e-288|phytoene desaturase [Dorcoceras hygrometricum]	GO:0016114//terpenoid biosynthetic process;GO:0044255//cellular lipid metabolic process;GO:0009987//cellular process;GO:0042440//pigment metabolic process;GO:0006720//isoprenoid metabolic process;GO:0006629//lipid metabolic process;GO:0008610//lipid biosynthetic process;GO:0046148//pigment biosynthetic process;GO:0008152//metabolic process;GO:0016108//tetraterpenoid metabolic process;GO:0071704//…
OfZ-ISO	evm.model.Contig290.63	2.205	3.7	1.255	K15744//zeta-carotene isomerase [EC:5.2.1.12]+ko00906//Carotenoid biosynthesis+ko01100//Metabolic pathways+ko01110//Biosynthesis of secondary metabolites	ko00906//Carotenoid biosynthesis;ko01100//Metabolic pathways;ko01110//Biosynthesis of secondary metabolites	Metabolism	Global and overview maps;Metabolism of terpenoids and polyketides	XP_022881954.1|4.7e-120|uncharacterized protein LOC111398988 [Olea europaea var. sylvestris]
OfZ-ISO	evm.model.Contig87.13	6.44	13.355	6.275	K15744//zeta-carotene isomerase [EC:5.2.1.12]+ko00906//Carotenoid biosynthesis+ko01100//Metabolic pathways+ko01110//Biosynthesis of secondary metabolites	ko01100//Metabolic pathways;ko00906//Carotenoid biosynthesis;ko01110//Biosynthesis of secondary metabolites	Metabolism	Global and overview maps;Metabolism of terpenoids and polyketides	XP_022888039.1|7.6e-137|uncharacterized protein LOC111403681 [Olea europaea var. sylvestris]
OfZ-ISO	evm.model.Contig94.101	11.98	15.405	6.84	K15744//zeta-carotene isomerase [EC:5.2.1.12]+ko00906//Carotenoid biosynthesis+ko01100//Metabolic pathways+ko01110//Biosynthesis of secondary metabolites;K15744//zeta-carotene isomerase [EC:5.2.1.12]+ko00906//Carotenoid biosynthesis+ko01100//Metabolic pathways+ko01110//Biosynthesis of secondary metabolites;K15744//zeta-carotene isomerase [EC:5.2.1.12]+ko00906//Carotenoid biosynthesis+ko01100//Met…	ko00906//Carotenoid biosynthesis;ko01100//Metabolic pathways;ko01110//Biosynthesis of secondary metabolites	Metabolism	Global and overview maps;Metabolism of terpenoids and polyketides	XP_011070485.1|1.4e-95|uncharacterized protein LOC105156132 [Sesamum indicum]
OfZ-ISO	evm.model.Contig27.271	5.875	13.075	9.055	K15744//zeta-carotene isomerase [EC:5.2.1.12]+ko00906//Carotenoid biosynthesis+ko01100//Metabolic pathways+ko01110//Biosynthesis of secondary metabolites	ko00906//Carotenoid biosynthesis;ko01100//Metabolic pathways;ko01110//Biosynthesis of secondary metabolites	Metabolism	Global and overview maps;Metabolism of terpenoids and polyketides	XP_022847092.1|6.2e-139|uncharacterized protein LOC111369708 isoform X1 [Olea europaea var. sylvestris]
OfZ-ISO	evm.model.Contig56.58	0.85	5.985	5.48	K15744//zeta-carotene isomerase [EC:5.2.1.12]+ko00906//Carotenoid biosynthesis+ko01100//Metabolic pathways+ko01110//Biosynthesis of secondary metabolites	ko01100//Metabolic pathways;ko01110//Biosynthesis of secondary metabolites;ko00906//Carotenoid biosynthesis	Metabolism	Metabolism of terpenoids and polyketides;Global and overview maps	XP_022880374.1|2.0e-126|uncharacterized protein LOC111397604 isoform X2 [Olea europaea var. sylvestris]
OfLCYE	evm.model.Contig123.95	24.495	9.14	5.775	K06444//lycopene epsilon-cyclase [EC:5.5.1.18]+ko00906//Carotenoid biosynthesis+ko01100//Metabolic pathways+ko01110//Biosynthesis of secondary metabolites;K06444//lycopene epsilon-cyclase [EC:5.5.1.18]+ko00906//Carotenoid biosynthesis+ko01100//Metabolic pathways+ko01110//Biosynthesis of secondary metabolites	ko01100//Metabolic pathways;ko00906//Carotenoid biosynthesis;ko01110//Biosynthesis of secondary metabolites	Metabolism	Global and overview maps;Metabolism of terpenoids and polyketides	XP_022842858.1|1.3e-295|lycopene epsilon cyclase, chloroplastic [Olea europaea var. sylvestris]	GO:0006629//lipid metabolic process;GO:0016114//terpenoid biosynthetic process;GO:0044249//cellular biosynthetic process;GO:0006720//isoprenoid metabolic process;GO:0044255//cellular lipid metabolic process;GO:0016117//carotenoid biosynthetic process;GO:0006721//terpenoid metabolic process;GO:0046148//pigment biosynthetic process;GO:0042440//pigment metabolic process;GO:0009058//biosynthetic proc…
OfHYB	evm.model.Contig47.12	14.2	38.325	152.7	K15746//beta-carotene 3-hydroxylase [EC:1.14.15.24]+ko00906//Carotenoid biosynthesis+ko01100//Metabolic pathways+ko01110//Biosynthesis of secondary metabolites;K15746//beta-carotene 3-hydroxylase [EC:1.14.15.24]+ko00906//Carotenoid biosynthesis+ko01100//Metabolic pathways+ko01110//Biosynthesis of secondary metabolites	ko01100//Metabolic pathways;ko01110//Biosynthesis of secondary metabolites;ko00906//Carotenoid biosynthesis	Metabolism	Global and overview maps;Metabolism of terpenoids and polyketides	XP_022874606.1|5.4e-166|beta-carotene hydroxylase 2, chloroplastic-like [Olea europaea var. sylvestris]	GO:0008610//lipid biosynthetic process;GO:0046148//pigment biosynthetic process;GO:0016117//carotenoid biosynthetic process;GO:0044249//cellular biosynthetic process;GO:0044255//cellular lipid metabolic process;GO:0009058//biosynthetic process;GO:0044237//cellular metabolic process;GO:0006629//lipid metabolic process;GO:0006721//terpenoid metabolic process;GO:0044238//primary metabolic process;GO…
OfHYB	evm.model.Contig496.37	8.89	20.62	64.42	K15746//beta-carotene 3-hydroxylase [EC:1.14.15.24]+ko00906//Carotenoid biosynthesis+ko01100//Metabolic pathways+ko01110//Biosynthesis of secondary metabolites	ko00906//Carotenoid biosynthesis;ko01100//Metabolic pathways;ko01110//Biosynthesis of secondary metabolites	Metabolism	Metabolism of terpenoids and polyketides;Global and overview maps	XP_022874606.1|6.4e-167|beta-carotene hydroxylase 2, chloroplastic-like [Olea europaea var. sylvestris]	GO:0016114//terpenoid biosynthetic process;GO:0044249//cellular biosynthetic process;GO:0006720//isoprenoid metabolic process;GO:0006721//terpenoid metabolic process;GO:0008299//isoprenoid biosynthetic process;GO:0008610//lipid biosynthetic process;GO:0016116//carotenoid metabolic process;GO:0044238//primary metabolic process;GO:0071704//organic substance metabolic process;GO:0044255//cellular li…
OfHYE	evm.model.Contig350.65	36.415	38.665	14.91	K09837//carotenoid epsilon hydroxylase [EC:1.14.14.158]+ko00906//Carotenoid biosynthesis+ko01100//Metabolic pathways+ko01110//Biosynthesis of secondary metabolites;K09837//carotenoid epsilon hydroxylase [EC:1.14.14.158]+ko00906//Carotenoid biosynthesis+ko01100//Metabolic pathways+ko01110//Biosynthesis of secondary metabolites	ko01100//Metabolic pathways;ko01110//Biosynthesis of secondary metabolites;ko00906//Carotenoid biosynthesis	Metabolism	Metabolism of terpenoids and polyketides;Global and overview maps	XP_022888641.1|1.1e-282|carotene epsilon-monooxygenase, chloroplastic [Olea europaea var. sylvestris]	GO:0048037//cofactor binding;GO:0020037//heme binding;GO:0005488//binding;GO:1901363//heterocyclic compound binding;GO:0003824//catalytic activity;GO:0004497//monooxygenase activity;GO:0005506//iron ion binding;GO:0046906//tetrapyrrole binding;GO:0016705//oxidoreductase activity, acting on paired donors, with incorporation or reduction of molecular oxygen;GO:0016491//oxidoreductase activity;GO:00…
OfZEP	evm.model.Contig71.184	113.81	165.505	232.12	K09838//zeaxanthin epoxidase [EC:1.14.15.21]+ko00906//Carotenoid biosynthesis+ko01100//Metabolic pathways+ko01110//Biosynthesis of secondary metabolites	ko01100//Metabolic pathways;ko01110//Biosynthesis of secondary metabolites;ko00906//Carotenoid biosynthesis	Metabolism	Metabolism of terpenoids and polyketides;Global and overview maps	XP_022863205.1|0.0e+00|zeaxanthin epoxidase, chloroplastic [Olea europaea var. sylvestris]	GO:0009687//abscisic acid metabolic process;GO:0009987//cellular process;GO:0008299//isoprenoid biosynthetic process;GO:0044249//cellular biosynthetic process;GO:0044237//cellular metabolic process;GO:0043288//apocarotenoid metabolic process;GO:0006721//terpenoid metabolic process;GO:1901576//organic substance biosynthetic process;GO:0046165//alcohol biosynthetic process;GO:0019752//carboxylic ac…
OfZEP	evm.model.Contig286.61	1.03	2.375	5.43	K09838//zeaxanthin epoxidase [EC:1.14.15.21]+ko00906//Carotenoid biosynthesis+ko01100//Metabolic pathways+ko01110//Biosynthesis of secondary metabolites	ko00906//Carotenoid biosynthesis;ko01110//Biosynthesis of secondary metabolites;ko01100//Metabolic pathways	Metabolism	Global and overview maps;Metabolism of terpenoids and polyketides	XP_022881523.1|9.6e-230|uncharacterized protein LOC111398710 isoform X1 [Olea europaea var. sylvestris]	GO:0005488//binding;GO:0048037//cofactor binding;GO:0004497//monooxygenase activity;GO:0043167//ion binding;GO:0050662//coenzyme binding;GO:0000166//nucleotide binding;GO:1901265//nucleoside phosphate binding;GO:0036094//small molecule binding;GO:0050660//flavin adenine dinucleotide binding;GO:0071949//FAD binding;GO:0043168//anion binding;GO:0016491//oxidoreductase activity;GO:1901363//heterocyc…
OfCCS	evm.model.Contig418.48	3.705	1.125	0.985	K14593//capsanthin/capsorubin synthase [EC:5.3.99.8]+ko00906//Carotenoid biosynthesis	ko00906//Carotenoid biosynthesis	Metabolism	Metabolism of terpenoids and polyketides	XP_022851386.1|5.0e-278|capsanthin/capsorubin synthase, chromoplastic-like [Olea europaea var. sylvestris]	GO:0016116//carotenoid metabolic process;GO:0006721//terpenoid metabolic process;GO:0006629//lipid metabolic process;GO:0044249//cellular biosynthetic process;GO:0006720//isoprenoid metabolic process;GO:0009987//cellular process;GO:0016109//tetraterpenoid biosynthetic process;GO:0042440//pigment metabolic process;GO:0008610//lipid biosynthetic process;GO:0071704//organic substance metabolic proce…
