# Supplementary material for: Biochemical and transcriptomic analyses reveal that critical genes involved in pigment biosynthesis influence leaf color changes in a new sweet osmanthus cultivar ‘Qiannan Guifei’
Source: PeerJ. 2021 Oct 8;9:e12265. doi: 10.7717/peerj.12265 (PMC8504463; doi:10.7717/peerj.12265)
Supplement: Supplemental Information 8 [file peerj-09-12265-s008.xlsx]

## Sheet: Table S19 
Table S19 DEGs involved in flavonoid biosynthesis during the leaf color change process
Gene name	Gene ID	R FPKM	YG FPKM	G FPKM	Kegg Orthology	Pathway Name	Level 1	Level 2	Nr	GO
OfPAL	evm.model.Contig204.8	76.16	176.98	83.505	K10775//phenylalanine ammonia-lyase [EC:4.3.1.24]+ko01100//Metabolic pathways+ko01110//Biosynthesis of secondary metabolites+ko00940//Phenylpropanoid biosynthesis+ko00360//Phenylalanine metabolism	ko01110//Biosynthesis of secondary metabolites;ko00940//Phenylpropanoid biosynthesis;ko00360//Phenylalanine metabolism;ko01100//Metabolic pathways	Metabolism	Amino acid metabolism;Biosynthesis of other secondary metabolites;Global and overview maps	XP_022887262.1|0.0e+00|phenylalanine ammonia-lyase-like isoform X1 [Olea europaea var. sylvestris]	GO:0016054//organic acid catabolic process;GO:1901605//alpha-amino acid metabolic process;GO:0072330//monocarboxylic acid biosynthetic process;GO:0006520//cellular amino acid metabolic process;GO:0006559//L-phenylalanine catabolic process;GO:0044238//primary metabolic process;GO:0006807//nitrogen compound metabolic process;GO:0016053//organic acid biosynthetic process;GO:0009699//phenylpropanoid …
OfPAL	evm.model.Contig337.42	37.065	32.095	0.425	K10775//phenylalanine ammonia-lyase [EC:4.3.1.24]+ko01100//Metabolic pathways+ko01110//Biosynthesis of secondary metabolites+ko00940//Phenylpropanoid biosynthesis+ko00360//Phenylalanine metabolism	ko00940//Phenylpropanoid biosynthesis;ko01100//Metabolic pathways;ko00360//Phenylalanine metabolism;ko01110//Biosynthesis of secondary metabolites	Metabolism	Amino acid metabolism;Global and overview maps;Biosynthesis of other secondary metabolites	XP_022887262.1|0.0e+00|phenylalanine ammonia-lyase-like isoform X1 [Olea europaea var. sylvestris]	GO:0009058//biosynthetic process;GO:0044248//cellular catabolic process;GO:1901576//organic substance biosynthetic process;GO:0019752//carboxylic acid metabolic process;GO:0016053//organic acid biosynthetic process;GO:0009699//phenylpropanoid biosynthetic process;GO:0009987//cellular process;GO:1902221//erythrose 4-phosphate/phosphoenolpyruvate family amino acid metabolic process;GO:0043436//oxoa…
OfPAL	evm.model.Contig345.59	0.32	2.745	0.765	K10775//phenylalanine ammonia-lyase [EC:4.3.1.24]+ko01100//Metabolic pathways+ko01110//Biosynthesis of secondary metabolites+ko00940//Phenylpropanoid biosynthesis+ko00360//Phenylalanine metabolism	ko00360//Phenylalanine metabolism;ko01110//Biosynthesis of secondary metabolites;ko01100//Metabolic pathways;ko00940//Phenylpropanoid biosynthesis	Metabolism	Biosynthesis of other secondary metabolites;Global and overview maps;Amino acid metabolism	XP_022886100.1|0.0e+00|phenylalanine ammonia-lyase-like [Olea europaea var. sylvestris]	GO:0006558//L-phenylalanine metabolic process;GO:0019439//aromatic compound catabolic process;GO:0008152//metabolic process;GO:1901605//alpha-amino acid metabolic process;GO:0044248//cellular catabolic process;GO:0009074//aromatic amino acid family catabolic process;GO:0044237//cellular metabolic process;GO:0019438//aromatic compound biosynthetic process;GO:0009699//phenylpropanoid biosynthetic p…
OfPAL	evm.model.Contig37.35	12.42	12.82	1.875	K10775//phenylalanine ammonia-lyase [EC:4.3.1.24]+ko01100//Metabolic pathways+ko01110//Biosynthesis of secondary metabolites+ko00940//Phenylpropanoid biosynthesis+ko00360//Phenylalanine metabolism	ko00940//Phenylpropanoid biosynthesis;ko00360//Phenylalanine metabolism;ko01100//Metabolic pathways;ko01110//Biosynthesis of secondary metabolites	Metabolism	Biosynthesis of other secondary metabolites;Global and overview maps;Amino acid metabolism	AHZ31605.1|0.0e+00|phenylalanine ammonia-lyase [Olea europaea]	GO:0009800//cinnamic acid biosynthetic process;GO:0071704//organic substance metabolic process;GO:0006559//L-phenylalanine catabolic process;GO:0006725//cellular aromatic compound metabolic process;GO:0009058//biosynthetic process;GO:0044237//cellular metabolic process;GO:0009072//aromatic amino acid family metabolic process;GO:1901362//organic cyclic compound biosynthetic process;GO:0032787//mon…
OfC4H	evm.model.Contig248.59	4.92	2.95	0.525	K00487//trans-cinnamate 4-monooxygenase [EC:1.14.14.91]+ko00130//Ubiquinone and other terpenoid-quinone biosynthesis+ko01100//Metabolic pathways+ko01110//Biosynthesis of secondary metabolites+ko00940//Phenylpropanoid biosynthesis+ko00941//Flavonoid biosynthesis+ko00945//Stilbenoid, diarylheptanoid and gingerol biosynthesis+ko00360//Phenylalanine metabolism	ko00945//Stilbenoid, diarylheptanoid and gingerol biosynthesis;ko00360//Phenylalanine metabolism;ko01110//Biosynthesis of secondary metabolites;ko00130//Ubiquinone and other terpenoid-quinone biosynthesis;ko00940//Phenylpropanoid biosynthesis;ko00941//Flavonoid biosynthesis;ko01100//Metabolic pathways	Metabolism	Metabolism of cofactors and vitamins;Biosynthesis of other secondary metabolites;Global and overview maps;Amino acid metabolism	AHZ90133.1|0.0e+00|cinnamate 4-hydroxylase [Osmanthus fragrans]	GO:0031224//intrinsic component of membrane;GO:0016020//membrane;GO:0016021//integral component of membrane;GO:0044425//membrane part;GO:0003824//catalytic activity;GO:0004497//monooxygenase activity;GO:1901363//heterocyclic compound binding;GO:0016491//oxidoreductase activity;GO:0048037//cofactor binding;GO:0043167//ion binding;GO:0097159//organic cyclic compound binding;GO:0046872//metal ion bi…
OfC4H	evm.model.Contig73.57	238.535	471.69	133.05	K00487//trans-cinnamate 4-monooxygenase [EC:1.14.14.91]+ko00130//Ubiquinone and other terpenoid-quinone biosynthesis+ko01100//Metabolic pathways+ko01110//Biosynthesis of secondary metabolites+ko00940//Phenylpropanoid biosynthesis+ko00941//Flavonoid biosynthesis+ko00945//Stilbenoid, diarylheptanoid and gingerol biosynthesis+ko00360//Phenylalanine metabolism	ko00940//Phenylpropanoid biosynthesis;ko00130//Ubiquinone and other terpenoid-quinone biosynthesis;ko00941//Flavonoid biosynthesis;ko00360//Phenylalanine metabolism;ko00945//Stilbenoid, diarylheptanoid and gingerol biosynthesis;ko01110//Biosynthesis of secondary metabolites;ko01100//Metabolic pathways	Metabolism	Global and overview maps;Metabolism of cofactors and vitamins;Amino acid metabolism;Biosynthesis of other secondary metabolites	ANF04753.1|7.1e-296|cinnamate 4-hydroxylase [Osmanthus fragrans]	GO:0097159//organic cyclic compound binding;GO:0004497//monooxygenase activity;GO:0048037//cofactor binding;GO:0043169//cation binding;GO:0046872//metal ion binding;GO:0016705//oxidoreductase activity, acting on paired donors, with incorporation or reduction of molecular oxygen;GO:0005488//binding;GO:0016709//oxidoreductase activity, acting on paired donors, with incorporation or reduction of mol…
Of4CL	evm.model.Contig430.47	9.54	84.92	2.865	K01904//4-coumarate--CoA ligase [EC:6.2.1.12]+ko00130//Ubiquinone and other terpenoid-quinone biosynthesis+ko01100//Metabolic pathways+ko01110//Biosynthesis of secondary metabolites+ko00940//Phenylpropanoid biosynthesis+ko00360//Phenylalanine metabolism;K01904//4-coumarate--CoA ligase [EC:6.2.1.12]+ko00130//Ubiquinone and other terpenoid-quinone biosynthesis+ko01100//Metabolic pathways+ko01110//B…	ko00360//Phenylalanine metabolism;ko00130//Ubiquinone and other terpenoid-quinone biosynthesis;ko00940//Phenylpropanoid biosynthesis;ko01100//Metabolic pathways;ko01110//Biosynthesis of secondary metabolites	Metabolism	Metabolism of cofactors and vitamins;Global and overview maps;Amino acid metabolism;Biosynthesis of other secondary metabolites	AHL44986.1|1.5e-133|4-coumarate:coenzyme A ligase 4 [Fraxinus mandshurica]	GO:0008152//metabolic process;GO:0016874//ligase activity;GO:0003824//catalytic activity;
Of4CL	evm.model.Contig45.204	107.81	105.55	4.575	K01904//4-coumarate--CoA ligase [EC:6.2.1.12]+ko00130//Ubiquinone and other terpenoid-quinone biosynthesis+ko01100//Metabolic pathways+ko01110//Biosynthesis of secondary metabolites+ko00940//Phenylpropanoid biosynthesis+ko00360//Phenylalanine metabolism	ko01110//Biosynthesis of secondary metabolites;ko00130//Ubiquinone and other terpenoid-quinone biosynthesis;ko00940//Phenylpropanoid biosynthesis;ko01100//Metabolic pathways;ko00360//Phenylalanine metabolism	Metabolism	Amino acid metabolism;Biosynthesis of other secondary metabolites;Global and overview maps;Metabolism of cofactors and vitamins	XP_011084613.1|2.9e-285|4-coumarate--CoA ligase 2 [Sesamum indicum]	GO:0003824//catalytic activity;GO:0016874//ligase activity;
Of4CL	evm.model.Contig46.221	59.795	14.09	2.21	K01904//4-coumarate--CoA ligase [EC:6.2.1.12]+ko00130//Ubiquinone and other terpenoid-quinone biosynthesis+ko01100//Metabolic pathways+ko01110//Biosynthesis of secondary metabolites+ko00940//Phenylpropanoid biosynthesis+ko00360//Phenylalanine metabolism	ko00130//Ubiquinone and other terpenoid-quinone biosynthesis;ko01100//Metabolic pathways;ko00940//Phenylpropanoid biosynthesis;ko01110//Biosynthesis of secondary metabolites;ko00360//Phenylalanine metabolism	Metabolism	Amino acid metabolism;Biosynthesis of other secondary metabolites;Global and overview maps;Metabolism of cofactors and vitamins	AHL44980.1|2.6e-307|4-coumarate:coenzyme A ligase 4 [Fraxinus mandshurica]	GO:0003824//catalytic activity;GO:0016874//ligase activity;
Of4CL	evm.model.Contig53.130	21.99	141.65	3.55	K01904//4-coumarate--CoA ligase [EC:6.2.1.12]+ko00130//Ubiquinone and other terpenoid-quinone biosynthesis+ko01100//Metabolic pathways+ko01110//Biosynthesis of secondary metabolites+ko00940//Phenylpropanoid biosynthesis+ko00360//Phenylalanine metabolism	ko00940//Phenylpropanoid biosynthesis;ko00360//Phenylalanine metabolism;ko01110//Biosynthesis of secondary metabolites;ko01100//Metabolic pathways;ko00130//Ubiquinone and other terpenoid-quinone biosynthesis	Metabolism	Global and overview maps;Amino acid metabolism;Biosynthesis of other secondary metabolites;Metabolism of cofactors and vitamins	AHL44986.1|9.6e-241|4-coumarate:coenzyme A ligase 4 [Fraxinus mandshurica]	GO:0016874//ligase activity;GO:0003824//catalytic activity;
OfCHS	evm.model.Contig24.27	560.19	206.63	94.03	K00660//chalcone synthase [EC:2.3.1.74]+ko04712//Circadian rhythm - plant+ko01100//Metabolic pathways+ko01110//Biosynthesis of secondary metabolites+ko00941//Flavonoid biosynthesis	ko00941//Flavonoid biosynthesis;ko04712//Circadian rhythm - plant;ko01100//Metabolic pathways;ko01110//Biosynthesis of secondary metabolites	Metabolism;Organismal Systems	Biosynthesis of other secondary metabolites;Environmental adaptation;Global and overview maps	AWX67435.1|4.5e-205|chalcone synthase 1 [Salvia miltiorrhiza]	GO:0008152//metabolic process;GO:0009058//biosynthetic process;GO:0016746//transferase activity, transferring acyl groups;GO:0016740//transferase activity;GO:0003824//catalytic activity;GO:0016747//transferase activity, transferring acyl groups other than amino-acyl groups;
OfCHS	evm.model.Contig320.44	119.975	19.755	0.56	K00660//chalcone synthase [EC:2.3.1.74]+ko04712//Circadian rhythm - plant+ko01100//Metabolic pathways+ko01110//Biosynthesis of secondary metabolites+ko00941//Flavonoid biosynthesis	ko01100//Metabolic pathways;ko00941//Flavonoid biosynthesis;ko01110//Biosynthesis of secondary metabolites;ko04712//Circadian rhythm - plant	Organismal Systems;Metabolism	Global and overview maps;Biosynthesis of other secondary metabolites;Environmental adaptation	O04111.1|2.1e-207|RecName: Full=Chalcone synthase; AltName: Full=Naringenin-chalcone synthase	GO:0009812//flavonoid metabolic process;GO:0008152//metabolic process;GO:0071704//organic substance metabolic process;GO:1901576//organic substance biosynthetic process;GO:0009813//flavonoid biosynthetic process;GO:0009058//biosynthetic process;GO:0016746//transferase activity, transferring acyl groups;GO:0003824//catalytic activity;GO:0016747//transferase activity, transferring acyl groups other…
OfCHI	evm.model.Contig190.11	162.81	128.53	50.29	K01859//chalcone isomerase [EC:5.5.1.6]+ko01100//Metabolic pathways+ko01110//Biosynthesis of secondary metabolites+ko00941//Flavonoid biosynthesis;K01859//chalcone isomerase [EC:5.5.1.6]+ko01100//Metabolic pathways+ko01110//Biosynthesis of secondary metabolites+ko00941//Flavonoid biosynthesis	ko01100//Metabolic pathways;ko00941//Flavonoid biosynthesis;ko01110//Biosynthesis of secondary metabolites	Metabolism	Global and overview maps;Biosynthesis of other secondary metabolites	XP_022867362.1|6.3e-108|probable chalcone--flavonone isomerase 3 [Olea europaea var. sylvestris]	GO:0016872//intramolecular lyase activity;GO:0016853//isomerase activity;GO:0003824//catalytic activity;
OfCHI	evm.model.Contig90.123	569.615	174.495	61.23	K01859//chalcone isomerase [EC:5.5.1.6]+ko01100//Metabolic pathways+ko01110//Biosynthesis of secondary metabolites+ko00941//Flavonoid biosynthesis	ko01100//Metabolic pathways;ko01110//Biosynthesis of secondary metabolites;ko00941//Flavonoid biosynthesis	Metabolism	Biosynthesis of other secondary metabolites;Global and overview maps	ALL27265.1|5.9e-134|chalcone isomerase [Osmanthus fragrans]	GO:0016872//intramolecular lyase activity;GO:0016853//isomerase activity;GO:0003824//catalytic activity;
OfF3H	evm.model.Contig482.28	239.2	27.565	0.225	K00475//naringenin 3-dioxygenase [EC:1.14.11.9]+ko01100//Metabolic pathways+ko01110//Biosynthesis of secondary metabolites+ko00941//Flavonoid biosynthesis	ko00941//Flavonoid biosynthesis;ko01100//Metabolic pathways;ko01110//Biosynthesis of secondary metabolites	Metabolism	Biosynthesis of other secondary metabolites;Global and overview maps	XP_022884727.1|1.9e-197|flavanone 3-dioxygenase-like [Olea europaea var. sylvestris]	GO:0005488//binding;GO:0046872//metal ion binding;GO:0051213//dioxygenase activity;GO:0043167//ion binding;GO:0016491//oxidoreductase activity;GO:0003824//catalytic activity;GO:0043169//cation binding;	1	0.999595
OfDFR	evm.model.Contig306.27	180.055	0.185	0.07	K13082//bifunctional dihydroflavonol 4-reductase/flavanone 4-reductase [EC:1.1.1.219 1.1.1.234]+ko01100//Metabolic pathways+ko01110//Biosynthesis of secondary metabolites+ko00941//Flavonoid biosynthesis	ko01110//Biosynthesis of secondary metabolites;ko00941//Flavonoid biosynthesis;ko01100//Metabolic pathways	Metabolism	Biosynthesis of other secondary metabolites;Global and overview maps	ANA96271.1|3.2e-130|ribulose-dihydroflavonol reductase [Osmanthus fragrans]	GO:0008152//metabolic process;GO:0071704//organic substance metabolic process;GO:0046283//anthocyanin-containing compound metabolic process;GO:0009812//flavonoid metabolic process;GO:0009813//flavonoid biosynthetic process;GO:1901576//organic substance biosynthetic process;GO:0046148//pigment biosynthetic process;GO:0009058//biosynthetic process;GO:0042440//pigment metabolic process;GO:0009718//a…
OfANS	evm.model.Contig583.8	282.365	0.045	0	K05277//anthocyanidin synthase [EC:1.14.20.4]+ko01100//Metabolic pathways+ko01110//Biosynthesis of secondary metabolites+ko00941//Flavonoid biosynthesis	ko00941//Flavonoid biosynthesis;ko01100//Metabolic pathways;ko01110//Biosynthesis of secondary metabolites	Metabolism	Biosynthesis of other secondary metabolites;Global and overview maps	XP_022846062.1|6.5e-187|leucoanthocyanidin dioxygenase-like [Olea europaea var. sylvestris]	GO:0043169//cation binding;GO:0043167//ion binding;GO:0016491//oxidoreductase activity;GO:0046872//metal ion binding;GO:0051213//dioxygenase activity;GO:0003824//catalytic activity;GO:0005488//binding;
OfUGT	evm.model.Contig11.137	18.51	0.195	0.485	K13496//UDP-glucosyl transferase 73C [EC:2.4.1.-];K08237//hydroquinone glucosyltransferase [EC:2.4.1.218];K12356//coniferyl-alcohol glucosyltransferase [EC:2.4.1.111]+ko00940//Phenylpropanoid biosynthesis;K22845//phlorizin synthase [EC:2.4.1.357]+ko01110//Biosynthesis of secondary metabolites+ko00941//Flavonoid biosynthesis	ko01110//Biosynthesis of secondary metabolites;ko00941//Flavonoid biosynthesis;ko00940//Phenylpropanoid biosynthesis	Metabolism	Biosynthesis of other secondary metabolites;Global and overview maps	XP_022883656.1|2.6e-255|UDP-glycosyltransferase 90A1-like [Olea europaea var. sylvestris]	GO:0008152//metabolic process;GO:0016740//transferase activity;GO:0016758//transferase activity, transferring hexosyl groups;GO:0016757//transferase activity, transferring glycosyl groups;GO:0003824//catalytic activity;
Of3AT	evm.model.Contig573.3	2.545	0.39	1.4	K21383//anthocyanidin 3-O-glucoside 6''-O-acyltransferase [EC:2.3.1.215]+ko00942//Anthocyanin biosynthesis;K13264//isoflavone 7-O-glucoside-6''-O-malonyltransferase [EC:2.3.1.115]+ko00943//Isoflavonoid biosynthesis+ko00944//Flavone and flavonol biosynthesis;K14329//agmatine coumaroyltransferase [EC:2.3.1.64 2.3.1.-]+ko00330//Arginine and proline metabolism;K21383//anthocyanidin 3-O-glucoside 6''-…	ko00330//Arginine and proline metabolism;ko00942//Anthocyanin biosynthesis;ko00943//Isoflavonoid biosynthesis;ko00944//Flavone and flavonol biosynthesis	Metabolism	Amino acid metabolism;Biosynthesis of other secondary metabolites	KZV52195.1|1.5e-131|malonyl-coenzyme A:anthocyanin 3-O-glucoside-6''-O-malonyltransferase-like [Dorcoceras hygrometricum]	GO:0016740//transferase activity;GO:0016746//transferase activity, transferring acyl groups;GO:0003824//catalytic activity;GO:0016747//transferase activity, transferring acyl groups other than amino-acyl groups;
