# Supplementary material for: Biochemical and transcriptomic analyses reveal that critical genes involved in pigment biosynthesis influence leaf color changes in a new sweet osmanthus cultivar ‘Qiannan Guifei’
Source: PeerJ. 2021 Oct 8;9:e12265. doi: 10.7717/peerj.12265 (PMC8504463; doi:10.7717/peerj.12265)
Supplement: Supplemental Information 9 [file peerj-09-12265-s009.xlsx]

## Sheet: Table S20
Table S20 Six differentially expressed OfMYBs
Gene name	Gene ID	R FPKM	YG FPKM	G FPKM	Log2(R/YG)	Log2(R/G)	Kegg Orthology	Nr	GO
OfMYB1	evm.model.Contig121.53	15.375	0.96	0.525	4.00141	4.87213	K09422//transcription factor MYB, plant	XP_022870118.1|8.6e-75|transcription factor MYB114-like [Olea europaea var. sylvestris]	GO:0005634//nucleus;GO:0005623//cell;GO:0043229//intracellular organelle;GO:0043226//organelle;GO:0005622//intracellular;GO:0044424//intracellular part;GO:0043231//intracellular membrane-bounded organelle;GO:0044464//cell part;GO:0043227//membrane-bounded organelle;GO:0003677//DNA binding;GO:0005488//binding;GO:0097159//organic cyclic compound binding;GO:0003676//nucleic acid binding;GO:1901363//…
OfMYB2	evm.model.Contig128.91	7.25	3.17	1.15	1.1935	2.65635	K09422//transcription factor MYB, plant	ANW12207.1|2.0e-99|putative MYB2 [Olea europaea subsp. europaea]	GO:0005623//cell;GO:0005622//intracellular;GO:0044464//cell part;GO:0005634//nucleus;GO:0044424//intracellular part;GO:0043229//intracellular organelle;GO:0043231//intracellular membrane-bounded organelle;GO:0043226//organelle;GO:0043227//membrane-bounded organelle;GO:0097159//organic cyclic compound binding;GO:0003676//nucleic acid binding;GO:1901363//heterocyclic compound binding;GO:0005488//bi…
OfMYB3	evm.model.Contig13.17	20.615	1.87	0.365	3.46258	5.81965	K09422//transcription factor MYB, plant	AKR80572.1|4.0e-22|R3 MYB transcription factor [Vaccinium uliginosum]	GO:0032502//developmental process;GO:0009987//cellular process;GO:0048869//cellular developmental process;GO:0030154//cell differentiation;GO:0005622//intracellular;GO:0043231//intracellular membrane-bounded organelle;GO:0043227//membrane-bounded organelle;GO:0043226//organelle;GO:0005634//nucleus;GO:0044424//intracellular part;GO:0005623//cell;GO:0043229//intracellular organelle;GO:0044464//cell…
OfMYB4	evm.model.Contig50.114	3.7	0.385	0.19	3.26459	4.28345	K09422//transcription factor MYB, plant	XP_022885010.1|3.4e-94|transcription factor MYB114-like [Olea europaea var. sylvestris]	GO:0005622//intracellular;GO:0005623//cell;GO:0043231//intracellular membrane-bounded organelle;GO:0043226//organelle;GO:0044464//cell part;GO:0043227//membrane-bounded organelle;GO:0044424//intracellular part;GO:0005634//nucleus;GO:0043229//intracellular organelle;GO:1901363//heterocyclic compound binding;GO:0003676//nucleic acid binding;GO:0097159//organic cyclic compound binding;GO:0003677//DN…
OfMYB5	evm.model.Contig570.2	39.935	13.265	1.25	1.59003	4.99765	K09422//transcription factor MYB, plant	XP_022895042.1|1.3e-153|myb-related protein 330-like [Olea europaea var. sylvestris]	GO:0043229//intracellular organelle;GO:0044424//intracellular part;GO:0043226//organelle;GO:0005634//nucleus;GO:0005623//cell;GO:0044464//cell part;GO:0043231//intracellular membrane-bounded organelle;GO:0043227//membrane-bounded organelle;GO:0005622//intracellular;GO:0003676//nucleic acid binding;GO:1901363//heterocyclic compound binding;GO:0097159//organic cyclic compound binding;GO:0003677//DN…
OfMYB6	evm.model.Contig8.333	28.025	7.97	6	1.81406	2.22368	K09422//transcription factor MYB, plant	XP_022896754.1|7.8e-151|myb-related protein 308-like [Olea europaea var. sylvestris]	GO:0032502//developmental process;GO:0030154//cell differentiation;GO:0048869//cellular developmental process;GO:0009987//cellular process;GO:0005634//nucleus;GO:0043229//intracellular organelle;GO:0044464//cell part;GO:0005622//intracellular;GO:0044424//intracellular part;GO:0043231//intracellular membrane-bounded organelle;GO:0043227//membrane-bounded organelle;GO:0043226//organelle;GO:0005623/…
